# Supplementary material for: Amino-oxetanes as amide isosteres by an alternative defluorosulfonylative coupling of sulfonyl fluorides
Source: Springer Nature journal article supplement (doi:10.1038/s41557-021-00856-2), 2022-01-27
Supplement: 41557_2021_856_MOESM149_ESM.cif [file 41557_2021_856_MOESM149_ESM.cif]

 
data_56
  
_audit_creation_method            'SHELXL-2018/3' 
_shelx_SHELXL_version_number      '2018/3' 
_chemical_name_systematic         ? 
_chemical_name_common             ? 
_chemical_melting_point           ? 
_chemical_formula_moiety
 'C19 H31 F O5 S Si' 
_chemical_formula_sum 
 'C19 H31 F O5 S Si' 
_chemical_formula_weight          418.59 
  
loop_ 
 _atom_type_symbol 
 _atom_type_description 
 _atom_type_scat_dispersion_real 
 _atom_type_scat_dispersion_imag 
 _atom_type_scat_source 
 'C'  'C'   0.0033   0.0016 
 'International Tables Vol C Tables 4.2.6.8 and 6.1.1.4' 
 'H'  'H'   0.0000   0.0000 
 'International Tables Vol C Tables 4.2.6.8 and 6.1.1.4' 
 'F'  'F'   0.0171   0.0103 
 'International Tables Vol C Tables 4.2.6.8 and 6.1.1.4' 
 'O'  'O'   0.0106   0.0060 
 'International Tables Vol C Tables 4.2.6.8 and 6.1.1.4' 
 'S'  'S'   0.1246   0.1234 
 'International Tables Vol C Tables 4.2.6.8 and 6.1.1.4' 
 'Si'  'Si'   0.0817   0.0704 
 'International Tables Vol C Tables 4.2.6.8 and 6.1.1.4' 
  
_space_group_crystal_system       orthorhombic 
_space_group_IT_number            61 
_space_group_name_H-M_alt         'P b c a' 
_space_group_name_Hall            '-P 2ac 2ab' 
  
_shelx_space_group_comment 
; 
The symmetry employed for this shelxl refinement is uniquely defined 
by the following loop, which should always be used as a source of 
symmetry information in preference to the above space-group names. 
They are only intended as comments. 
; 
  
loop_ 
 _space_group_symop_operation_xyz 
 'x, y, z' 
 '-x+1/2, -y, z+1/2' 
 '-x, y+1/2, -z+1/2' 
 'x+1/2, -y+1/2, -z' 
 '-x, -y, -z' 
 'x-1/2, y, -z-1/2' 
 'x, -y-1/2, z-1/2' 
 '-x-1/2, y-1/2, z' 
  
_cell_length_a                    10.1479(4) 
_cell_length_b                    12.1911(5) 
_cell_length_c                    35.6650(15) 
_cell_angle_alpha                 90 
_cell_angle_beta                  90 
_cell_angle_gamma                 90 
_cell_volume                      4412.3(3) 
_cell_formula_units_Z             8 
_cell_measurement_temperature     173(2) 
_cell_measurement_reflns_used     4214 
_cell_measurement_theta_min       2.9580 
_cell_measurement_theta_max       27.7010 
  
_exptl_crystal_description        needles 
_exptl_crystal_colour             Colourless 
_exptl_crystal_density_meas       ? 
_exptl_crystal_density_method     ? 
_exptl_crystal_density_diffrn     1.260 
_exptl_crystal_F_000              1792 
_exptl_transmission_factor_min    ? 
_exptl_transmission_factor_max    ? 
_exptl_crystal_size_max           0.599 
_exptl_crystal_size_mid           0.114 
_exptl_crystal_size_min           0.061 
_exptl_absorpt_coefficient_mu     0.235 
_shelx_estimated_absorpt_T_min    ? 
_shelx_estimated_absorpt_T_max    ? 
_exptl_absorpt_correction_type    analytical 
_exptl_absorpt_correction_T_min   0.927 
_exptl_absorpt_correction_T_max   0.987 
_exptl_absorpt_process_details     
; 
CrysAlisPro 1.171.38.46 (Rigaku Oxford Diffraction, 2015) 
Analytical numeric absorption correction using a multifaceted crystal 
model based on expressions derived by R.C. Clark & J.S. Reid. 
(Clark, R. C. & Reid, J. S. (1995). Acta Cryst. A51, 887-897) 
Empirical absorption correction using spherical harmonics, 
implemented in SCALE3 ABSPACK scaling algorithm. 
; 
_exptl_absorpt_special_details    ? 
_diffrn_ambient_temperature       173(2) 
_diffrn_radiation_wavelength      0.71073 
_diffrn_radiation_type            MoK\a 
_diffrn_source                    'Enhance (Mo) X-ray Source' 
_diffrn_measurement_device_type   'Agilent Xcalibur 3 E' 
_diffrn_measurement_method        'omega scans' 
_diffrn_detector_area_resol_mean  16.0382 
_diffrn_reflns_number             23619 
_diffrn_reflns_av_unetI/netI      0.0466 
_diffrn_reflns_av_R_equivalents   0.0500 
_diffrn_reflns_limit_h_min        -13 
_diffrn_reflns_limit_h_max        11 
_diffrn_reflns_limit_k_min        -16 
_diffrn_reflns_limit_k_max        10 
_diffrn_reflns_limit_l_min        -47 
_diffrn_reflns_limit_l_max        43 
_diffrn_reflns_theta_min          2.673 
_diffrn_reflns_theta_max          28.317 
_diffrn_reflns_theta_full         25.242 
_diffrn_measured_fraction_theta_max   0.895 
_diffrn_measured_fraction_theta_full  0.999 
_diffrn_reflns_Laue_measured_fraction_max    0.895 
_diffrn_reflns_Laue_measured_fraction_full   0.999 
_diffrn_reflns_point_group_measured_fraction_max   0.895 
_diffrn_reflns_point_group_measured_fraction_full  0.999 
_reflns_number_total              4921 
_reflns_number_gt                 3559 
_reflns_threshold_expression      'I > 2\s(I)' 
_reflns_Friedel_coverage          0.000 
_reflns_Friedel_fraction_max      . 
_reflns_Friedel_fraction_full     . 
  
_reflns_special_details 
; 
 Reflections were merged by SHELXL according to the crystal 
 class for the calculation of statistics and refinement. 
  
 _reflns_Friedel_fraction is defined as the number of unique 
 Friedel pairs measured divided by the number that would be 
 possible theoretically, ignoring centric projections and 
 systematic absences. 
; 
  
_computing_data_collection        'CrysAlisPro, Rigaku OD' 
_computing_cell_refinement        'CrysAlisPro, Rigaku OD' 
_computing_data_reduction         'CrysAlisPro, Rigaku OD' 
_computing_structure_solution     'SHELXS-2014 (Sheldrick, 2017)' 
_computing_structure_refinement 'SHELXL-2018/3 (Sheldrick, 2018)' 
_computing_molecular_graphics     'Bruker SHELXTL' 
_computing_publication_material   'CIFTAB-2014 (Sheldrick, 2017)' 
_refine_special_details           ? 
_refine_ls_structure_factor_coef  Fsqd 
_refine_ls_matrix_type            full 
_refine_ls_weighting_scheme       calc 
_refine_ls_weighting_details 
'w=1/[\s^2^(Fo^2^)+(0.0489P)^2^+3.0571P] where P=(Fo^2^+2Fc^2^)/3' 
_atom_sites_solution_primary      ? 
_atom_sites_solution_secondary    ? 
_atom_sites_solution_hydrogens    geom 
_refine_ls_hydrogen_treatment     constr 
_refine_ls_extinction_method      none 
_refine_ls_extinction_coef        . 
_refine_ls_number_reflns          4921 
_refine_ls_number_parameters      282 
_refine_ls_number_restraints      201 
_refine_ls_R_factor_all           0.0880 
_refine_ls_R_factor_gt            0.0582 
_refine_ls_wR_factor_ref          0.1373 
_refine_ls_wR_factor_gt           0.1248 
_refine_ls_goodness_of_fit_ref    1.087 
_refine_ls_restrained_S_all       1.199 
_refine_ls_shift/su_max           0.000 
_refine_ls_shift/su_mean          0.000 
  
loop_ 
 _atom_site_label 
 _atom_site_type_symbol 
 _atom_site_fract_x 
 _atom_site_fract_y 
 _atom_site_fract_z 
 _atom_site_U_iso_or_equiv 
 _atom_site_adp_type 
 _atom_site_occupancy 
 _atom_site_site_symmetry_order 
 _atom_site_calc_flag 
 _atom_site_refinement_flags_posn 
 _atom_site_refinement_flags_adp 
 _atom_site_refinement_flags_occupancy 
 _atom_site_disorder_assembly 
 _atom_site_disorder_group 
C1 C 0.5911(2) 0.68646(18) 0.45198(7) 0.0302(5) Uani 1 1 d . . . . . 
C2 C 0.5443(3) 0.7242(2) 0.49111(8) 0.0443(7) Uani 1 1 d . . . . . 
H2A H 0.451240 0.748506 0.491607 0.053 Uiso 1 1 calc R U . . . 
H2B H 0.561446 0.669860 0.511144 0.053 Uiso 1 1 calc R U . . . 
O3 O 0.6372(3) 0.81361(18) 0.49072(6) 0.0795(8) Uani 1 1 d . . . . . 
C4 C 0.6770(3) 0.7911(2) 0.45307(8) 0.0436(7) Uani 1 1 d . . . . . 
H4A H 0.772463 0.776132 0.450551 0.052 Uiso 1 1 calc R U . . . 
H4B H 0.648672 0.847923 0.434951 0.052 Uiso 1 1 calc R U . . . 
C5 C 0.4934(2) 0.67153(18) 0.42083(7) 0.0294(5) Uani 1 1 d . . . . . 
C6 C 0.3769(2) 0.61313(19) 0.42703(7) 0.0301(5) Uani 1 1 d . . . . . 
H6A H 0.359851 0.582201 0.450989 0.036 Uiso 1 1 calc R U . . . 
C7 C 0.2864(2) 0.6002(2) 0.39831(7) 0.0331(6) Uani 1 1 d . . . . . 
C8 C 0.3107(2) 0.6487(2) 0.36332(7) 0.0348(6) Uani 1 1 d . . . . . 
C9 C 0.4264(3) 0.7047(2) 0.35744(7) 0.0407(6) Uani 1 1 d . . . . . 
H9A H 0.443538 0.736195 0.333564 0.049 Uiso 1 1 calc R U . . . 
C10 C 0.5177(3) 0.7158(2) 0.38577(7) 0.0365(6) Uani 1 1 d . . . . . 
H10A H 0.597720 0.754015 0.381219 0.044 Uiso 1 1 calc R U . . . 
O11 O 0.17052(18) 0.54518(16) 0.40100(5) 0.0458(5) Uani 1 1 d . . . . . 
C12 C 0.1401(3) 0.4938(3) 0.43602(8) 0.0553(8) Uani 1 1 d . . . . . 
H12A H 0.051820 0.461471 0.434761 0.083 Uiso 1 1 calc R U . . . 
H12B H 0.142775 0.548677 0.456094 0.083 Uiso 1 1 calc R U . . . 
H12C H 0.204908 0.436179 0.441189 0.083 Uiso 1 1 calc R U . . . 
O13 O 0.22079(18) 0.63603(16) 0.33512(5) 0.0432(5) Uani 1 1 d D . . . . 
Si14 Si 0.07941(7) 0.70211(6) 0.32778(2) 0.0376(2) Uani 1 1 d D . . . . 
C15 C 0.0815(4) 0.7419(4) 0.27761(10) 0.0681(13) Uani 0.825(3) 1 d D . P A 1 
H15A H -0.000922 0.784579 0.272743 0.082 Uiso 0.825(3) 1 calc R U P A 1 
C16 C 0.1982(6) 0.8185(6) 0.26916(16) 0.100(2) Uani 0.825(3) 1 d D U P A 1 
H16A H 0.196602 0.880760 0.286542 0.149 Uiso 0.825(3) 1 calc R U P A 1 
H16B H 0.281010 0.778095 0.272221 0.149 Uiso 0.825(3) 1 calc R U P A 1 
H16C H 0.191423 0.845451 0.243349 0.149 Uiso 0.825(3) 1 calc R U P A 1 
C17 C 0.0803(6) 0.6431(5) 0.25098(12) 0.108(2) Uani 0.825(3) 1 d D U P A 1 
H17A H 0.005108 0.595795 0.256970 0.162 Uiso 0.825(3) 1 calc R U P A 1 
H17B H 0.072705 0.668884 0.225043 0.162 Uiso 0.825(3) 1 calc R U P A 1 
H17C H 0.162292 0.601528 0.253915 0.162 Uiso 0.825(3) 1 calc R U P A 1 
C18 C -0.0564(3) 0.6007(3) 0.33899(10) 0.0505(9) Uani 0.825(3) 1 d D . P A 1 
H18A H -0.068323 0.602966 0.366811 0.061 Uiso 0.825(3) 1 calc R U P A 1 
C19 C -0.1892(4) 0.6333(4) 0.32193(14) 0.0734(13) Uani 0.825(3) 1 d D . P A 1 
H19A H -0.208979 0.709729 0.328365 0.110 Uiso 0.825(3) 1 calc R U P A 1 
H19B H -0.185225 0.625551 0.294604 0.110 Uiso 0.825(3) 1 calc R U P A 1 
H19C H -0.258535 0.585538 0.331904 0.110 Uiso 0.825(3) 1 calc R U P A 1 
C20 C -0.0248(5) 0.4820(3) 0.32913(15) 0.0772(14) Uani 0.825(3) 1 d D U P A 1 
H20A H 0.060296 0.461635 0.340116 0.116 Uiso 0.825(3) 1 calc R U P A 1 
H20B H -0.093818 0.433954 0.339114 0.116 Uiso 0.825(3) 1 calc R U P A 1 
H20C H -0.020508 0.473966 0.301814 0.116 Uiso 0.825(3) 1 calc R U P A 1 
C21 C 0.0669(4) 0.8263(3) 0.35859(11) 0.0501(9) Uani 0.825(3) 1 d D . P A 1 
H21A H 0.153448 0.865204 0.356657 0.060 Uiso 0.825(3) 1 calc R U P A 1 
C22 C 0.0448(5) 0.8031(4) 0.40026(11) 0.0680(14) Uani 0.825(3) 1 d D U P A 1 
H22A H 0.111815 0.751460 0.409202 0.102 Uiso 0.825(3) 1 calc R U P A 1 
H22B H 0.051454 0.871764 0.414436 0.102 Uiso 0.825(3) 1 calc R U P A 1 
H22C H -0.042938 0.771273 0.403844 0.102 Uiso 0.825(3) 1 calc R U P A 1 
C23 C -0.0384(5) 0.9074(3) 0.34469(15) 0.0866(16) Uani 0.825(3) 1 d D . P A 1 
H23A H -0.024487 0.922451 0.317988 0.130 Uiso 0.825(3) 1 calc R U P A 1 
H23B H -0.126094 0.875484 0.348317 0.130 Uiso 0.825(3) 1 calc R U P A 1 
H23C H -0.031702 0.975974 0.358908 0.130 Uiso 0.825(3) 1 calc R U P A 1 
C15' C 0.1566(13) 0.8334(8) 0.3033(4) 0.040(4) Uiso 0.175(3) 1 d D . P A 2 
H15B H 0.215918 0.866919 0.322533 0.047 Uiso 0.175(3) 1 calc R U P A 2 
C16' C 0.0603(17) 0.9196(11) 0.2938(5) 0.067(5) Uiso 0.175(3) 1 d D . P A 2 
H16D H 0.006814 0.936739 0.315894 0.101 Uiso 0.175(3) 1 calc R U P A 2 
H16E H 0.107098 0.985719 0.285580 0.101 Uiso 0.175(3) 1 calc R U P A 2 
H16F H 0.002937 0.893691 0.273518 0.101 Uiso 0.175(3) 1 calc R U P A 2 
C17' C 0.246(2) 0.7986(18) 0.2716(6) 0.074(7) Uiso 0.175(3) 1 d D U P A 2 
H17D H 0.306540 0.741393 0.280489 0.110 Uiso 0.175(3) 1 calc R U P A 2 
H17E H 0.193178 0.769912 0.250859 0.110 Uiso 0.175(3) 1 calc R U P A 2 
H17F H 0.297340 0.861940 0.262920 0.110 Uiso 0.175(3) 1 calc R U P A 2 
C18' C -0.0261(11) 0.6167(10) 0.2975(3) 0.035(3) Uiso 0.175(3) 1 d D . P A 2 
H18B H -0.103445 0.662808 0.290180 0.042 Uiso 0.175(3) 1 calc R U P A 2 
C19' C 0.038(3) 0.577(2) 0.2613(4) 0.100(8) Uiso 0.175(3) 1 d D U P A 2 
H19D H 0.073080 0.639763 0.247389 0.151 Uiso 0.175(3) 1 calc R U P A 2 
H19E H 0.110480 0.526427 0.267374 0.151 Uiso 0.175(3) 1 calc R U P A 2 
H19F H -0.027328 0.538625 0.245960 0.151 Uiso 0.175(3) 1 calc R U P A 2 
C20' C -0.081(2) 0.5166(15) 0.3194(6) 0.083(7) Uiso 0.175(3) 1 d D U P A 2 
H20D H -0.122397 0.541745 0.342713 0.124 Uiso 0.175(3) 1 calc R U P A 2 
H20E H -0.146414 0.478450 0.304001 0.124 Uiso 0.175(3) 1 calc R U P A 2 
H20F H -0.008607 0.466252 0.325415 0.124 Uiso 0.175(3) 1 calc R U P A 2 
C21' C -0.0014(10) 0.7531(10) 0.3695(3) 0.034(3) Uiso 0.175(3) 1 d D . P A 2 
H21B H -0.012405 0.688465 0.386524 0.041 Uiso 0.175(3) 1 calc R U P A 2 
C22' C 0.0746(18) 0.8395(16) 0.3921(5) 0.058(6) Uiso 0.175(3) 1 d D U P A 2 
H22D H 0.163986 0.812850 0.397157 0.086 Uiso 0.175(3) 1 calc R U P A 2 
H22E H 0.079288 0.907905 0.377743 0.086 Uiso 0.175(3) 1 calc R U P A 2 
H22F H 0.029132 0.853047 0.415928 0.086 Uiso 0.175(3) 1 calc R U P A 2 
C23' C -0.1426(11) 0.7981(14) 0.3621(4) 0.056(5) Uiso 0.175(3) 1 d D . P A 2 
H23D H -0.193058 0.744070 0.347644 0.084 Uiso 0.175(3) 1 calc R U P A 2 
H23E H -0.186929 0.811835 0.386035 0.084 Uiso 0.175(3) 1 calc R U P A 2 
H23F H -0.136773 0.866694 0.347849 0.084 Uiso 0.175(3) 1 calc R U P A 2 
S24 S 0.69000(6) 0.56576(5) 0.45522(2) 0.03575(18) Uani 1 1 d . . . . . 
O25 O 0.7582(2) 0.55074(16) 0.42034(5) 0.0513(5) Uani 1 1 d . . . . . 
O26 O 0.61591(18) 0.47667(14) 0.46878(5) 0.0431(5) Uani 1 1 d . . . . . 
F27 F 0.79344(18) 0.59692(15) 0.48414(5) 0.0657(5) Uani 1 1 d . . . . . 
  
loop_ 
 _atom_site_aniso_label 
 _atom_site_aniso_U_11 
 _atom_site_aniso_U_22 
 _atom_site_aniso_U_33 
 _atom_site_aniso_U_23 
 _atom_site_aniso_U_13 
 _atom_site_aniso_U_12 
C1 0.0309(13) 0.0233(11) 0.0365(13) -0.0018(10) -0.0023(10) -0.0002(10) 
C2 0.0520(18) 0.0370(14) 0.0440(15) -0.0133(12) 0.0025(13) -0.0071(13) 
O3 0.112(2) 0.0590(14) 0.0673(15) -0.0327(12) 0.0195(14) -0.0468(15) 
C4 0.0486(17) 0.0319(13) 0.0503(16) -0.0024(12) -0.0028(13) -0.0107(12) 
C5 0.0276(12) 0.0238(11) 0.0367(13) -0.0015(10) -0.0034(10) 0.0047(10) 
C6 0.0304(13) 0.0263(12) 0.0335(12) 0.0012(10) -0.0032(10) 0.0015(10) 
C7 0.0274(13) 0.0317(13) 0.0401(13) -0.0018(11) -0.0050(10) 0.0013(11) 
C8 0.0309(13) 0.0396(14) 0.0337(13) -0.0036(11) -0.0056(11) 0.0117(11) 
C9 0.0376(15) 0.0482(15) 0.0362(13) 0.0101(12) 0.0013(12) 0.0070(13) 
C10 0.0294(13) 0.0382(14) 0.0419(14) 0.0072(11) 0.0025(11) 0.0009(11) 
O11 0.0377(11) 0.0569(12) 0.0428(10) 0.0027(9) -0.0102(8) -0.0133(9) 
C12 0.0509(19) 0.064(2) 0.0510(17) 0.0052(15) -0.0037(15) -0.0255(16) 
O13 0.0376(11) 0.0575(12) 0.0346(9) -0.0080(8) -0.0106(8) 0.0140(9) 
Si14 0.0327(4) 0.0440(4) 0.0360(4) 0.0027(3) -0.0069(3) 0.0041(3) 
C15 0.051(2) 0.105(4) 0.048(2) 0.025(2) -0.0078(19) 0.007(2) 
C16 0.079(4) 0.142(5) 0.077(3) 0.063(3) -0.003(3) -0.005(4) 
C17 0.117(5) 0.170(6) 0.037(2) -0.009(3) -0.014(3) 0.027(5) 
C18 0.047(2) 0.053(2) 0.052(2) 0.0001(17) -0.0115(17) -0.0060(18) 
C19 0.040(2) 0.084(3) 0.097(3) 0.011(3) -0.009(2) -0.009(2) 
C20 0.074(3) 0.057(3) 0.101(4) -0.009(2) -0.034(3) -0.017(2) 
C21 0.042(2) 0.0408(19) 0.067(2) -0.0024(17) -0.0043(17) 0.0008(16) 
C22 0.083(3) 0.058(3) 0.063(3) -0.015(2) 0.013(2) 0.014(3) 
C23 0.087(4) 0.050(2) 0.122(4) -0.012(3) -0.028(3) 0.027(3) 
S24 0.0293(3) 0.0306(3) 0.0474(4) 0.0057(3) -0.0058(3) 0.0021(3) 
O25 0.0479(12) 0.0513(12) 0.0546(11) 0.0067(10) 0.0191(10) 0.0141(10) 
O26 0.0392(11) 0.0276(9) 0.0623(12) 0.0050(8) 0.0016(9) 0.0010(8) 
F27 0.0578(12) 0.0594(11) 0.0800(12) 0.0135(9) -0.0371(10) -0.0076(9) 
  
_geom_special_details 
; 
 All esds (except the esd in the dihedral angle between two l.s. planes) 
 are estimated using the full covariance matrix.  The cell esds are taken 
 into account individually in the estimation of esds in distances, angles 
 and torsion angles; correlations between esds in cell parameters are only 
 used when they are defined by crystal symmetry.  An approximate (isotropic) 
 treatment of cell esds is used for estimating esds involving l.s. planes. 
; 
  
loop_ 
 _geom_bond_atom_site_label_1 
 _geom_bond_atom_site_label_2 
 _geom_bond_distance 
 _geom_bond_site_symmetry_2 
 _geom_bond_publ_flag 
C1 C5 1.500(3) . ? 
C1 C2 1.545(3) . ? 
C1 C4 1.546(3) . ? 
C1 S24 1.785(2) . ? 
C2 O3 1.441(3) . ? 
O3 C4 1.429(3) . ? 
C5 C10 1.384(3) . ? 
C5 C6 1.397(3) . ? 
C6 C7 1.385(3) . ? 
C7 O11 1.357(3) . ? 
C7 C8 1.402(3) . ? 
C8 O13 1.366(3) . ? 
C8 C9 1.375(4) . ? 
C9 C10 1.378(4) . ? 
O11 C12 1.431(3) . ? 
O13 Si14 1.6662(19) . ? 
Si14 C21' 1.810(9) . ? 
Si14 C18' 1.842(9) . ? 
Si14 C15 1.854(4) . ? 
Si14 C21 1.875(3) . ? 
Si14 C18 1.893(4) . ? 
Si14 C15' 1.984(10) . ? 
C15 C17 1.534(6) . ? 
C15 C16 1.538(6) . ? 
C18 C20 1.524(5) . ? 
C18 C19 1.532(5) . ? 
C21 C22 1.530(5) . ? 
C21 C23 1.538(5) . ? 
C15' C16' 1.475(11) . ? 
C15' C17' 1.512(13) . ? 
C18' C19' 1.528(12) . ? 
C18' C20' 1.553(12) . ? 
C21' C22' 1.535(12) . ? 
C21' C23' 1.557(11) . ? 
S24 O26 1.4066(18) . ? 
S24 O25 1.4355(19) . ? 
S24 F27 1.5198(17) . ? 
  
loop_ 
 _geom_angle_atom_site_label_1 
 _geom_angle_atom_site_label_2 
 _geom_angle_atom_site_label_3 
 _geom_angle 
 _geom_angle_site_symmetry_1 
 _geom_angle_site_symmetry_3 
 _geom_angle_publ_flag 
C5 C1 C2 120.1(2) . . ? 
C5 C1 C4 119.4(2) . . ? 
C2 C1 C4 84.51(18) . . ? 
C5 C1 S24 108.64(15) . . ? 
C2 C1 S24 111.10(18) . . ? 
C4 C1 S24 111.21(18) . . ? 
O3 C2 C1 90.9(2) . . ? 
C4 O3 C2 92.80(18) . . ? 
O3 C4 C1 91.32(19) . . ? 
C10 C5 C6 119.5(2) . . ? 
C10 C5 C1 120.3(2) . . ? 
C6 C5 C1 120.2(2) . . ? 
C7 C6 C5 120.1(2) . . ? 
O11 C7 C6 125.4(2) . . ? 
O11 C7 C8 115.0(2) . . ? 
C6 C7 C8 119.6(2) . . ? 
O13 C8 C9 120.9(2) . . ? 
O13 C8 C7 119.3(2) . . ? 
C9 C8 C7 119.7(2) . . ? 
C8 C9 C10 120.8(2) . . ? 
C9 C10 C5 120.3(2) . . ? 
C7 O11 C12 117.7(2) . . ? 
C8 O13 Si14 129.47(16) . . ? 
O13 Si14 C21' 115.3(4) . . ? 
O13 Si14 C18' 108.6(4) . . ? 
C21' Si14 C18' 114.3(5) . . ? 
O13 Si14 C15 105.57(15) . . ? 
O13 Si14 C21 110.88(13) . . ? 
C15 Si14 C21 110.79(19) . . ? 
O13 Si14 C18 106.13(13) . . ? 
C15 Si14 C18 112.51(18) . . ? 
C21 Si14 C18 110.74(17) . . ? 
O13 Si14 C15' 96.8(4) . . ? 
C21' Si14 C15' 105.3(6) . . ? 
C18' Si14 C15' 115.3(6) . . ? 
C17 C15 C16 111.2(4) . . ? 
C17 C15 Si14 113.1(3) . . ? 
C16 C15 Si14 110.9(3) . . ? 
C20 C18 C19 109.9(3) . . ? 
C20 C18 Si14 114.7(3) . . ? 
C19 C18 Si14 112.8(3) . . ? 
C22 C21 C23 109.3(3) . . ? 
C22 C21 Si14 115.5(3) . . ? 
C23 C21 Si14 112.2(3) . . ? 
C16' C15' C17' 115.3(11) . . ? 
C16' C15' Si14 114.5(9) . . ? 
C17' C15' Si14 109.9(9) . . ? 
C19' C18' C20' 109.1(11) . . ? 
C19' C18' Si14 115.2(9) . . ? 
C20' C18' Si14 111.0(9) . . ? 
C22' C21' C23' 108.1(10) . . ? 
C22' C21' Si14 116.1(9) . . ? 
C23' C21' Si14 113.4(8) . . ? 
O26 S24 O25 117.20(12) . . ? 
O26 S24 F27 109.21(11) . . ? 
O25 S24 F27 106.67(13) . . ? 
O26 S24 C1 110.99(11) . . ? 
O25 S24 C1 108.67(11) . . ? 
F27 S24 C1 103.08(11) . . ? 
  
_refine_diff_density_max    0.287 
_refine_diff_density_min   -0.316 
_refine_diff_density_rms    0.054 
  
_shelx_res_file 
; 
TITL JAB2111 in Pbca 
    JAB2111.res 
    created by SHELXL-2018/3 at 10:33:08 on 06-May-2021 
REM Pbca (#61 in standard setting) 
REM JR-2-147 
CELL 0.71073  10.147916  12.191090  35.665009  90.0000  90.0000  90.0000 
ZERR    8.00   0.000412   0.000478   0.001492   0.0000   0.0000   0.0000 
LATT  1 
SYMM -x+1/2,-y, z+1/2 
SYMM -x, y+1/2,-z+1/2 
SYMM  x+1/2,-y+1/2,-z 
SFAC C H F O S Si 
UNIT 152 248 8 40 8 8 
TEMP -100 
  
L.S. 6 
FMAP 2 
PLAN 10 
  
ACTA 
  
SADI SI14 C15  SI14 C18  SI14 C21  = 
     SI14 C15' SI14 C18' SI14 C21' 
SADI C15  C16  C15  C17  C18  C19  C18  C20  C21  C22  C21  C23  = 
     C15' C16' C15' C17' C18' C19' C18' C20' C21' C22' C21' C23' 
SADI O13  C15  O13  C18  O13  C21  = 
     O13  C15' O13  C18' O13  C21' 
SADI SI14 C16  SI14 C17  SI14 C19  SI14 C20  SI14 C22  SI14 C23  = 
     SI14 C16' SI14 C17' SI14 C19' SI14 C20' SI14 C22' SI14 C23' 
SADI C16  C17  C19  C20  C22  C23  = 
     C16' C17' C19' C20' C22' C23' 
SIMU 0.02 0.02 1 C15 > C23' 
  
WGHT    0.048900    3.057100 
FVAR       2.88616   0.82506 
C1    1    0.591108    0.686457    0.451977    11.00000    0.03095    0.02325 = 
         0.03655   -0.00179   -0.00235   -0.00023 
C2    1    0.544322    0.724237    0.491112    11.00000    0.05197    0.03698 = 
         0.04402   -0.01327    0.00253   -0.00707 
AFIX  23 
H2A   2    0.451240    0.748506    0.491607    11.00000   -1.20000 
H2B   2    0.561446    0.669860    0.511144    11.00000   -1.20000 
AFIX   0 
O3    4    0.637224    0.813606    0.490719    11.00000    0.11223    0.05904 = 
         0.06730   -0.03273    0.01950   -0.04676 
C4    1    0.676991    0.791109    0.453074    11.00000    0.04865    0.03187 = 
         0.05028   -0.00242   -0.00284   -0.01073 
AFIX  23 
H4A   2    0.772463    0.776132    0.450551    11.00000   -1.20000 
H4B   2    0.648672    0.847923    0.434951    11.00000   -1.20000 
AFIX   0 
C5    1    0.493399    0.671525    0.420831    11.00000    0.02759    0.02384 = 
         0.03666   -0.00149   -0.00338    0.00471 
C6    1    0.376946    0.613130    0.427029    11.00000    0.03035    0.02634 = 
         0.03347    0.00122   -0.00316    0.00152 
AFIX  43 
H6A   2    0.359851    0.582201    0.450989    11.00000   -1.20000 
AFIX   0 
C7    1    0.286376    0.600242    0.398311    11.00000    0.02744    0.03167 = 
         0.04008   -0.00181   -0.00498    0.00131 
C8    1    0.310652    0.648704    0.363323    11.00000    0.03094    0.03961 = 
         0.03370   -0.00364   -0.00562    0.01168 
C9    1    0.426356    0.704740    0.357439    11.00000    0.03756    0.04824 = 
         0.03621    0.01014    0.00127    0.00696 
AFIX  43 
H9A   2    0.443538    0.736195    0.333564    11.00000   -1.20000 
AFIX   0 
C10   1    0.517706    0.715816    0.385769    11.00000    0.02942    0.03819 = 
         0.04188    0.00716    0.00253    0.00095 
AFIX  43 
H10A  2    0.597720    0.754015    0.381219    11.00000   -1.20000 
AFIX   0 
O11   4    0.170517    0.545185    0.400995    11.00000    0.03773    0.05694 = 
         0.04282    0.00275   -0.01024   -0.01331 
C12   1    0.140109    0.493832    0.436019    11.00000    0.05092    0.06399 = 
         0.05097    0.00515   -0.00371   -0.02551 
AFIX 137 
H12A  2    0.051820    0.461471    0.434761    11.00000   -1.50000 
H12B  2    0.142775    0.548677    0.456094    11.00000   -1.50000 
H12C  2    0.204908    0.436179    0.441189    11.00000   -1.50000 
AFIX   0 
O13   4    0.220793    0.636028    0.335120    11.00000    0.03757    0.05746 = 
         0.03459   -0.00802   -0.01062    0.01397 
SI14  6    0.079406    0.702112    0.327777    11.00000    0.03273    0.04403 = 
         0.03602    0.00265   -0.00688    0.00414 
PART   1 
C15   1    0.081482    0.741913    0.277614    21.00000    0.05121    0.10476 = 
         0.04844    0.02483   -0.00776    0.00697 
AFIX  13 
H15A  2   -0.000922    0.784579    0.272743    21.00000   -1.20000 
AFIX   0 
C16   1    0.198220    0.818503    0.269165    21.00000    0.07887    0.14233 = 
         0.07744    0.06299   -0.00296   -0.00520 
AFIX  33 
H16A  2    0.196602    0.880760    0.286542    21.00000   -1.50000 
H16B  2    0.281010    0.778095    0.272221    21.00000   -1.50000 
H16C  2    0.191423    0.845451    0.243349    21.00000   -1.50000 
AFIX   0 
C17   1    0.080289    0.643109    0.250981    21.00000    0.11711    0.16962 = 
         0.03683   -0.00933   -0.01369    0.02667 
AFIX  33 
H17A  2    0.005108    0.595795    0.256970    21.00000   -1.50000 
H17B  2    0.072705    0.668884    0.225043    21.00000   -1.50000 
H17C  2    0.162292    0.601528    0.253915    21.00000   -1.50000 
AFIX   0 
C18   1   -0.056359    0.600745    0.338990    21.00000    0.04653    0.05254 = 
         0.05245    0.00007   -0.01148   -0.00595 
AFIX  13 
H18A  2   -0.068323    0.602966    0.366811    21.00000   -1.20000 
AFIX   0 
C19   1   -0.189242    0.633325    0.321929    21.00000    0.03963    0.08404 = 
         0.09651    0.01058   -0.00907   -0.00932 
AFIX  33 
H19A  2   -0.208979    0.709729    0.328365    21.00000   -1.50000 
H19B  2   -0.185225    0.625551    0.294604    21.00000   -1.50000 
H19C  2   -0.258535    0.585538    0.331904    21.00000   -1.50000 
AFIX   0 
C20   1   -0.024779    0.481974    0.329128    21.00000    0.07377    0.05736 = 
         0.10059   -0.00864   -0.03370   -0.01738 
AFIX  33 
H20A  2    0.060296    0.461635    0.340116    21.00000   -1.50000 
H20B  2   -0.093818    0.433954    0.339114    21.00000   -1.50000 
H20C  2   -0.020508    0.473966    0.301814    21.00000   -1.50000 
AFIX   0 
C21   1    0.066943    0.826323    0.358585    21.00000    0.04204    0.04078 = 
         0.06734   -0.00240   -0.00430    0.00077 
AFIX  13 
H21A  2    0.153448    0.865204    0.356657    21.00000   -1.20000 
AFIX   0 
C22   1    0.044833    0.803121    0.400260    21.00000    0.08314    0.05820 = 
         0.06265   -0.01536    0.01260    0.01426 
AFIX  33 
H22A  2    0.111815    0.751460    0.409202    21.00000   -1.50000 
H22B  2    0.051454    0.871764    0.414436    21.00000   -1.50000 
H22C  2   -0.042938    0.771273    0.403844    21.00000   -1.50000 
AFIX   0 
C23   1   -0.038389    0.907413    0.344689    21.00000    0.08738    0.05000 = 
         0.12238   -0.01188   -0.02815    0.02657 
AFIX  33 
H23A  2   -0.024487    0.922451    0.317988    21.00000   -1.50000 
H23B  2   -0.126094    0.875484    0.348317    21.00000   -1.50000 
H23C  2   -0.031702    0.975974    0.358908    21.00000   -1.50000 
AFIX   0 
PART   2 
C15'  1    0.156621    0.833385    0.303295   -21.00000    0.03951 
AFIX  13 
H15B  2    0.215918    0.866919    0.322533   -21.00000   -1.20000 
AFIX   0 
C16'  1    0.060282    0.919621    0.293773   -21.00000    0.06705 
AFIX  33 
H16D  2    0.006814    0.936739    0.315894   -21.00000   -1.50000 
H16E  2    0.107098    0.985719    0.285580   -21.00000   -1.50000 
H16F  2    0.002937    0.893691    0.273518   -21.00000   -1.50000 
AFIX   0 
C17'  1    0.246307    0.798598    0.271604   -21.00000    0.07366 
AFIX  33 
H17D  2    0.306540    0.741393    0.280489   -21.00000   -1.50000 
H17E  2    0.193178    0.769912    0.250859   -21.00000   -1.50000 
H17F  2    0.297340    0.861940    0.262920   -21.00000   -1.50000 
AFIX   0 
C18'  1   -0.026123    0.616746    0.297544   -21.00000    0.03499 
AFIX  13 
H18B  2   -0.103445    0.662808    0.290180   -21.00000   -1.20000 
AFIX   0 
C19'  1    0.038300    0.576811    0.261321   -21.00000    0.10045 
AFIX  33 
H19D  2    0.073080    0.639763    0.247389   -21.00000   -1.50000 
H19E  2    0.110480    0.526427    0.267374   -21.00000   -1.50000 
H19F  2   -0.027328    0.538625    0.245960   -21.00000   -1.50000 
AFIX   0 
C20'  1   -0.080940    0.516560    0.319437   -21.00000    0.08284 
AFIX  33 
H20D  2   -0.122397    0.541745    0.342713   -21.00000   -1.50000 
H20E  2   -0.146414    0.478450    0.304001   -21.00000   -1.50000 
H20F  2   -0.008607    0.466252    0.325415   -21.00000   -1.50000 
AFIX   0 
C21'  1   -0.001433    0.753075    0.369533   -21.00000    0.03414 
AFIX  13 
H21B  2   -0.012405    0.688465    0.386524   -21.00000   -1.20000 
AFIX   0 
C22'  1    0.074618    0.839535    0.392133   -21.00000    0.05759 
AFIX  33 
H22D  2    0.163986    0.812850    0.397157   -21.00000   -1.50000 
H22E  2    0.079288    0.907905    0.377743   -21.00000   -1.50000 
H22F  2    0.029132    0.853047    0.415928   -21.00000   -1.50000 
AFIX   0 
C23'  1   -0.142634    0.798090    0.362074   -21.00000    0.05619 
AFIX  33 
H23D  2   -0.193058    0.744070    0.347644   -21.00000   -1.50000 
H23E  2   -0.186929    0.811835    0.386035   -21.00000   -1.50000 
H23F  2   -0.136773    0.866694    0.347849   -21.00000   -1.50000 
AFIX   0 
PART   0 
S24   5    0.690004    0.565762    0.455224    11.00000    0.02925    0.03064 = 
         0.04737    0.00565   -0.00584    0.00206 
O25   4    0.758238    0.550739    0.420341    11.00000    0.04793    0.05127 = 
         0.05456    0.00674    0.01909    0.01407 
O26   4    0.615910    0.476674    0.468776    11.00000    0.03924    0.02758 = 
         0.06234    0.00503    0.00164    0.00103 
F27   3    0.793435    0.596922    0.484143    11.00000    0.05781    0.05938 = 
         0.07997    0.01352   -0.03709   -0.00758 
  
HKLF 4 
  
  
  
  
REM  JAB2111 in Pbca 
REM wR2 = 0.1373, GooF = S = 1.087, Restrained GooF = 1.199 for all data 
REM R1 = 0.0582 for 3559 Fo > 4sig(Fo) and 0.0880 for all 4921 data 
REM 282 parameters refined using 201 restraints 
  
END 
  
WGHT      0.0489      3.0571 
  
REM Highest difference peak  0.287,  deepest hole -0.316,  1-sigma level  0.054 
Q1    1   0.6266  0.6294  0.4520  11.00000  0.05    0.29 
Q2    1   0.5543  0.8215  0.4857  11.00000  0.05    0.28 
Q3    1   0.7746  0.5775  0.4372  11.00000  0.05    0.25 
Q4    1   0.2838  0.8355  0.2782  11.00000  0.05    0.23 
Q5    1   0.1010  0.9414  0.2913  11.00000  0.05    0.22 
Q6    1   0.8063  0.5413  0.4128  11.00000  0.05    0.22 
Q7    1   0.1485  0.5563  0.2587  11.00000  0.05    0.21 
Q8    1   0.6613  0.8278  0.4993  11.00000  0.05    0.20 
Q9    1   0.2501  0.6924  0.3406  11.00000  0.05    0.20 
Q10   1   0.2061  0.9569  0.3082  11.00000  0.05    0.20 
; 
_shelx_res_checksum   44048 
  
_shelx_hkl_file 
; 
   0   0  -5 6.49720 70.5000   3 
   0   0   5 40.3536 49.1023   1 
   0   0   6 85505.7 1008.11   3 
   0   0  -6 85877.4 852.136   1 
   0   0  -7 1985.12 214.661   1 
   0   0  -7 70.7090 188.615   3 
   0   0   7 1986.46 305.824   3 
   0   0   7 494.528 115.714   1 
   0   0   8 39992.1 678.536   1 
   0   0  -8 40570.2 678.770   1 
   0   0  -8 38983.0 794.821   3 
   0   0   8 39795.6 811.516   3 
   0   0   9 2307.19 253.130   1 
   0   0  -9 3915.63 347.779   1 
   0   0   9 2949.88 416.565   3 
   0   0 -10 212438. 1731.46   1 
   0   0 -10 208484. 2024.73   3 
   0   0  10 215125. 1742.79   1 
   0   0  10 212012. 2053.17   3 
   0   0  11 2864.73 488.780   3 
   0   0 -11 7423.12 732.629   3 
   0   0  11 5247.36 428.714   1 
   0   0 -11 9738.73 533.320   1 
   0   0  11 4606.92 610.860   2 
   0   0  12 254286. 2080.58   1 
   0   0  12 259269. 2493.33   3 
   0   0 -12 251965. 2062.40   1 
   0   0  12 256641. 2023.76   2 
   0   0 -12 248958. 2411.98   3 
   0   0  13 5641.49 578.701   2 
   0   0  13 5594.35 439.347   1 
   0   0 -13 7803.35 546.150   1 
   0   0  13 6752.35 618.908   3 
   0   0  14 59804.4 1063.31   2 
   0   0 -14 57195.0 1058.99   1 
   0   0  14 57363.3 1071.03   1 
   0   0 -14 54722.2 1235.46   3 
   0   0  14 58110.3 1291.79   3 
   0   0 -15 2015.88 318.881   1 
   0   0  15 1014.33 313.222   3 
   0   0  15 1965.50 379.247   2 
   0   0  15 1338.86 259.783   1 
   0   0  16 44072.2 1208.64   3 
   0   0  16 43468.1 978.535   2 
   0   0 -16 41943.7 1150.73   3 
   0   0  16 43752.8 997.399   1 
   0   0  17 1651.44 295.527   1 
   0   0  17 1636.58 398.054   3 
   0   0 -17 2532.15 533.480   3 
   0   0  18 86272.4 1467.80   2 
   0   0  18 85111.7 1786.48   3 
   0   0 -18 82647.8 1713.17   3 
   0   0  18 86697.2 1486.52   1 
   0   0  19 3300.30 372.351   2 
   0   0  19 1897.00 435.141   3 
   0   0  19 1859.77 322.126   1 
   0   0 -20 365.381 205.096   3 
   0   0  20 616.608 250.844   3 
   0   0  20 604.214 178.399   2 
   0   0  20 773.832 184.183   1 
   0   0  21 760.730 302.220   3 
   0   0  21 426.007 206.694   1 
   0   0 -21 854.469 383.544   3 
   0   0  21 958.798 310.780   2 
   0   0  22 40065.4 1121.31   2 
   0   0 -22 41710.9 1371.87   3 
   0   0  22 42422.7 1156.22   1 
   0   0  22 42222.7 1398.72   3 
   0   0  23 3054.76 396.120   2 
   0   0  23 2391.61 452.984   3 
   0   0  23 1590.63 335.451   1 
   0   0 -24 41845.9 1468.99   3 
   0   0  24 43129.4 1225.17   1 
   0   0  24 41748.7 1185.88   2 
   0   0  25 1730.44 355.029   2 
   0   0  25 1533.45 302.207   1 
   0   0 -25 2007.39 519.288   3 
   0   0 -26 13527.8 851.596   3 
   0   0  26 13698.7 720.596   1 
   0   0  26 13777.9 707.675   2 
   0   0  27 283.128 190.139   2 
   0   0  27 680.700 236.481   1 
   0   0 -27 764.775 363.921   3 
   0   0 -28 10220.3 791.626   3 
   0   0  28 9409.03 615.063   2 
   0   0  28 9160.94 617.286   1 
   0   0  29 206.575 161.868   2 
   0   0 -29 615.743 329.788   3 
   0   0  29 216.628 171.273   1 
   0   0  30 1603.83 290.638   2 
   0   0 -30 2450.48 479.555   3 
   0   0  30 1779.17 310.673   1 
   0   0  31 2492.62 420.718   2 
   0   0 -31 3151.76 693.980   3 
   0   0  31 2274.97 420.561   1 
   0   0  32 82601.0 1943.79   2 
   0   0 -32 84497.9 2426.75   3 
   0   0  32 80344.5 1938.29   1 
   0   0  33 4364.75 583.198   2 
   0   0 -33 8091.54 890.117   3 
   0   0  34 27273.0 1171.89   2 
   0   0 -34 28672.6 1469.34   3 
   0   0 -35 1456.01 456.288   3 
   0   0  35 1440.86 322.793   2 
   0   0  36 875.456 247.003   2 
   0   0 -36 785.297 362.050   3 
   0   0 -37 701.649 397.848   3 
   0   0 -38 8428.22 858.031   3 
   0   0 -39 265.623 353.986   3 
   0   0 -40 6323.83 808.966   3 
   0   0 -41 640.420 395.292   3 
   0   0 -42 3819.28 638.854   3 
   0   0 -43 371.216 348.587   3 
   0   0 -44 336.044 373.645   3 
   0   0 -45-256.807 324.993   3 
   0   0 -46 242.435 342.980   3 
   0   0 -47-286.723 390.605   3 
   0  -1  -3 66.2208 72.8570   3 
   0   1  -3-92.7504 78.0836   2 
   0   1  -4 154.645 102.591   2 
   0   1   4 113.723 103.905   3 
   0  -1  -4-166.808 110.147   3 
   0  -1   4 254.860 118.967   2 
   0  -1   5-118.847 119.195   2 
   0   1  -5 170.822 121.005   2 
   0  -1   5-87.6170 80.9545   3 
   0   1   5-87.5164 137.572   3 
   0  -1  -5-8.41813 124.287   3 
   0   1  -5 102.819 62.0046   3 
   0  -1   6-15.1246 103.573   1 
   0   1   6 36.3452 60.9531   1 
   0  -1  -6 16.3886 73.0667   1 
   0   1  -6 85.6005 77.7098   3 
   0  -1   6 128.704 97.1426   3 
   0   1  -6-128.532 125.254   2 
   0  -1   6 204.678 143.014   2 
   0   1   6-75.6401 154.706   3 
   0  -1  -6 73.4006 151.743   3 
   0   1   7-63.7164 145.739   3 
   0  -1  -7 182.226 181.023   3 
   0  -1  -7 172.408 93.4212   1 
   0  -1   7-30.2606 112.166   1 
   0   1  -7 13.4320 105.881   3 
   0   1   7 87.2687 68.7532   1 
   0  -1   7-256.709 150.952   2 
   0  -1   7 112.444 108.223   3 
   0  -1  -8-88.5727 87.8260   1 
   0  -1  -8 209.072 194.779   3 
   0   1  -8 40.8151 107.438   3 
   0  -1   8 89.7881 122.421   1 
   0  -1   8 0.25859 116.168   3 
   0  -1   8 65.3753 150.324   2 
   0   1   8-63.8715 147.431   3 
   0   1   8 53.9273 75.1537   1 
   0   1  -9 53.5529 126.480   3 
   0  -1  -9 478.388 231.312   3 
   0  -1   9 203.602 170.634   2 
   0  -1   9 78.8511 120.665   1 
   0   1   9 147.012 176.073   3 
   0   1   9-4.02493 75.4721   1 
   0  -1   9 149.459 133.088   3 
   0  -1  -9 155.182 106.359   1 
   0   1 -10 200.248 144.850   3 
   0  -1 -10 109.717 208.493   3 
   0   1  10-46.1260 187.293   3 
   0  -1  10 52.4460 132.698   1 
   0  -1  10 47.3914 156.903   3 
   0  -1  10 313.384 178.459   2 
   0   1  10 56.6180 90.0740   1 
   0  -1 -10 63.3919 100.478   1 
   0  -1  11-51.6507 164.207   2 
   0   1 -11 63.4131 163.454   3 
   0   1  11-129.270 220.769   3 
   0  -1  11 97.6031 143.175   1 
   0   1  11-12.7438 88.4312   1 
   0  -1 -11-52.5075 209.427   3 
   0  -1 -11 63.9009 113.679   1 
   0  -1  11 120.418 176.524   3 
   0   1  12 42.9417 98.2096   1 
   0  -1  12-72.3415 152.415   3 
   0  -1  12-93.4401 186.368   2 
   0  -1  12 33.8173 133.475   1 
   0   1  12-370.637 211.862   3 
   0   1 -12 229.620 185.866   3 
   0  -1 -12 167.006 123.562   1 
   0  -1 -12 28.8103 220.746   3 
   0  -1  13-94.4973 149.874   3 
   0   1 -13-45.9016 175.553   3 
   0  -1  13 8.68461 165.827   2 
   0   1  13-108.512 102.275   1 
   0   1  13 142.024 169.301   3 
   0  -1  13 18.4340 123.950   1 
   0  -1 -13 56.2735 115.529   1 
   0  -1 -13 40.9048 224.839   3 
   0  -1 -14-75.8460 117.639   1 
   0   1 -14 75.7427 170.203   3 
   0   1  14 38.5031 106.506   1 
   0  -1  14 4.76123 124.314   1 
   0  -1  14-123.727 151.744   3 
   0   1  14-379.348 219.851   3 
   0  -1 -14 71.9129 207.442   3 
   0  -1  14 112.303 168.672   2 
   0   1  15 115.825 206.781   3 
   0  -1  15-30.9530 178.583   2 
   0  -1  15-3.30428 141.794   3 
   0  -1 -15-19.6983 117.460   1 
   0   1  15 79.3503 108.942   1 
   0  -1 -15 42.9935 238.454   3 
   0  -1  15 365.140 165.289   1 
   0   1 -15 371.043 206.807   3 
   0  -1  16 93.0160 148.749   1 
   0   1  16 211.542 134.026   1 
   0  -1 -16 475.617 289.391   3 
   0  -1 -16 84.1639 125.636   1 
   0   1  16 309.339 234.111   3 
   0  -1  16 224.736 163.293   3 
   0  -1  16 485.940 200.532   2 
   0   1 -16 397.983 201.808   3 
   0   1  17 218.226 198.554   3 
   0  -1  17 275.656 161.510   1 
   0  -1  17 315.803 210.173   2 
   0  -1 -17 123.227 230.656   3 
   0  -1 -17 142.011 132.986   1 
   0  -1  17 134.781 171.095   3 
   0   1 -17 159.818 198.351   3 
   0   1  17 86.5767 115.280   1 
   0  -1  18 218.602 180.161   3 
   0  -1  18 262.035 194.990   2 
   0  -1 -18-92.4243 210.455   3 
   0   1 -18 102.607 165.125   3 
   0   1  18-79.9244 173.626   3 
   0  -1  18 0.60069 154.045   1 
   0  -1 -18-20.6911 124.510   1 
   0   1  18-53.5429 108.053   2 
   0   1  18-157.847 128.852   1 
   0  -1  19 267.504 136.138   1 
   0  -1  19-289.048 176.437   2 
   0   1 -19 0.46241 172.008   3 
   0   1  19 189.694 115.713   2 
   0   1  19-264.898 192.319   3 
   0  -1  19 19.6690 150.586   3 
   0  -1 -19 59.1701 208.657   3 
   0   1  19 82.2678 98.9749   1 
   0  -1 -19 39.1985 113.085   1 
   0  -1  20-119.403 157.770   2 
   0   1  20 79.0981 117.861   1 
   0  -1 -20 188.661 140.506   1 
   0   1 -20-129.832 179.444   3 
   0  -1  20 10.3677 117.991   1 
   0  -1 -20 73.9139 214.234   3 
   0  -1  20 16.2252 166.287   3 
   0   1  20-77.6842 108.508   2 
   0   1  20 297.189 237.445   3 
   0  -1 -21 108.787 133.044   1 
   0  -1  21 115.480 160.622   3 
   0   1  21 40.4795 112.791   2 
   0  -1  21-166.435 154.384   2 
   0   1 -21 60.0721 201.521   3 
   0  -1 -21-320.037 210.155   3 
   0   1  21-190.253 168.265   3 
   0  -1  21 51.9765 129.679   1 
   0   1  21-62.3975 100.364   1 
   0   1  22-75.9431 113.309   2 
   0   1  22-22.9850 106.211   1 
   0  -1 -22-26.1458 222.337   3 
   0  -1  22 190.185 162.659   1 
   0  -1  22 22.4191 166.245   3 
   0   1 -22 28.0744 201.584   3 
   0  -1  22 62.5587 175.224   2 
   0  -1  23-0.07451 146.097   2 
   0  -1  23 42.7684 160.226   3 
   0  -1  23 53.6653 149.945   1 
   0   1 -23 270.979 224.120   3 
   0   1  23 169.605 128.262   2 
   0   1  23 137.336 123.626   1 
   0  -1 -23 407.161 283.893   3 
   0   1 -24 342.990 228.141   3 
   0   1  24-27.4142 136.217   2 
   0  -1 -24 264.788 256.844   3 
   0   1  24 68.1019 115.322   1 
   0  -1  24 382.206 201.939   1 
   0  -1  24 423.374 217.595   2 
   0  -1  24 121.176 153.288   3 
   0   1  25 224.790 150.060   2 
   0  -1 -25 16.8120 223.177   3 
   0   1 -25 32.3378 197.252   3 
   0  -1  25-119.104 163.018   2 
   0  -1  25 237.790 168.161   1 
   0   1  25-25.6769 103.405   1 
   0  -1  26-37.7556 139.896   1 
   0   1 -26 0.67858 234.683   3 
   0  -1  26-5.57077 163.954   2 
   0   1  26 25.8160 117.761   2 
   0   1  26-26.2103 100.230   1 
   0  -1 -26-556.673 319.740   3 
   0   1  27-47.2489 133.106   2 
   0  -1  27-348.629 206.877   2 
   0  -1 -27 206.406 235.194   3 
   0   1 -27-325.596 300.777   3 
   0  -1  27-84.9998 134.606   1 
   0   1  27-17.5409 99.0152   1 
   0  -1  28 8.08866 149.194   1 
   0   1  28-10.7376 117.022   1 
   0   1  28-444.744 202.821   2 
   0   1 -28-422.183 265.796   3 
   0  -1  28-149.177 169.221   2 
   0   1  29 54.7495 145.968   2 
   0   1 -29-137.226 237.856   3 
   0   1  29 21.1111 124.049   1 
   0  -1  29-308.843 219.774   2 
   0  -1  29-7.33920 137.916   1 
   0  -1 -29 417.029 282.694   3 
   0   1  30-51.5126 125.851   1 
   0   1 -30 160.508 216.702   3 
   0  -1 -30 527.376 279.989   3 
   0  -1  30 35.6303 173.665   2 
   0   1  30 18.9598 140.583   2 
   0  -1  30-106.173 149.104   1 
   0   1  31 70.4439 125.347   1 
   0   1 -31 222.193 257.644   3 
   0  -1 -31-366.556 283.276   3 
   0  -1  31 39.1648 162.990   2 
   0   1  31 152.822 135.518   2 
   0   1 -32-100.758 214.386   3 
   0  -1 -32 520.348 324.098   3 
   0  -1  32 277.557 242.713   2 
   0   1  32 203.730 156.880   2 
   0   1  33 141.475 140.388   2 
   0  -1  33 86.8477 244.281   2 
   0  -1 -33 237.276 320.338   3 
   0   1 -33 279.262 297.817   3 
   0  -1  34-248.813 217.518   2 
   0  -1 -34 34.2847 235.355   3 
   0   1 -34 250.754 328.847   3 
   0   1  34 261.381 175.226   2 
   0  -1 -35-116.781 261.004   3 
   0  -1  35 186.891 231.511   2 
   0   1 -35 198.788 269.670   3 
   0  -1  36 110.348 197.369   2 
   0   1 -36 6.26917 237.733   3 
   0  -1 -36-113.708 265.861   3 
   0  -1  37 258.260 172.321   2 
   0   1 -37-274.559 287.114   3 
   0  -1 -37 38.5143 263.339   3 
   0   1 -38 286.270 309.618   3 
   0  -1 -38 309.486 329.962   3 
   0  -1 -39-576.259 380.179   3 
   0   1 -39-23.9794 294.648   3 
   0   1 -40 719.401 348.993   3 
   0  -1 -40-336.445 338.797   3 
   0   1 -41 355.632 263.456   3 
   0  -1 -41 91.6008 258.102   3 
   0  -1 -42 204.111 346.144   3 
   0   1 -42 103.962 266.448   3 
   0   1 -43 337.882 278.991   3 
   0  -1 -43-321.650 355.237   3 
   0  -1 -44-408.437 313.386   3 
   0   1 -44-107.239 289.093   3 
   0   1 -45-164.783 311.183   3 
   0  -1 -45 370.102 317.139   3 
   0  -1 -46-149.082 362.273   3 
   0  -2   0 105663. 1156.68   2 
   0  -2   0 100933. 874.757   3 
   0   2   0 99571.7 874.528   3 
   0   2   1 498318. 2185.90   3 
   0  -2  -1 510706. 2432.92   2 
   0  -2   1 507503. 2641.91   2 
   0  -2  -1 503831. 2156.09   3 
   0   2  -1 135615. 1365.88   2 
   0  -2   2 167218. 1576.98   2 
   0   2  -2 70827.9 1013.36   2 
   0  -2  -2 165878. 1336.42   2 
   0   2   2 168293. 1409.96   3 
   0   2   2 43072.4 691.044   2 
   0  -2  -2 163939. 1357.52   3 
   0  -2  -3 350716. 1833.56   2 
   0  -2  -3 336346. 2094.40   3 
   0   2   3 342318. 2169.31   3 
   0  -2   3 340684. 2358.82   2 
   0   2   4 565.509 101.958   2 
   0   2  -4 645.801 157.374   2 
   0  -2   4 767.401 196.860   2 
   0  -2  -4 645.634 106.530   2 
   0  -2  -5 12243.8 312.938   2 
   0   2   5 14589.1 571.259   3 
   0   2   5 12417.6 334.889   2 
   0  -2   5 12613.5 516.899   2 
   0   2  -5 11890.7 513.018   2 
   0  -2  -5 14991.4 575.965   3 
   0  -2  -6 110247. 1445.22   3 
   0   2  -6 103250. 1477.75   2 
   0  -2  -6 111074. 937.514   2 
   0  -2   6 108621. 1473.35   2 
   0   2   6 104729. 942.474   2 
   0   2   6 111509. 1484.09   3 
   0   2   7 76802.2 790.496   2 
   0  -2  -7 78368.1 876.474   1 
   0   2  -7 73340.6 1275.90   2 
   0   2  -7 74313.5 715.656   3 
   0   2   7 76531.7 1331.12   3 
   0  -2  -8 293095. 1705.01   1 
   0  -2   8 285200. 1533.69   3 
   0  -2  -8 284456. 2530.37   3 
   0   2  -8 276742. 1509.24   3 
   0   2   8 280354. 2596.39   3 
   0   2   8 287333. 1519.69   2 
   0   2  -8 273690. 2506.42   2 
   0  -2   8 281646. 2522.30   2 
   0  -2   9 4184.06 221.468   3 
   0  -2   9 5367.97 631.393   2 
   0   2   9 4673.60 532.953   3 
   0   2   9 3991.40 195.650   2 
   0  -2  -9 4318.31 233.287   1 
   0   2  -9 4094.72 363.050   2 
   0   2 -10 13692.1 461.394   3 
   0   2  10 12841.3 660.230   3 
   0  -2  10 11246.9 392.680   3 
   0  -2  10 15161.8 738.849   2 
   0   2 -10 11250.2 550.973   2 
   0   2  10 11175.5 319.157   2 
   0  -2 -10 11522.1 362.826   1 
   0  -2  10 11215.2 563.678   1 
   0   2  11 99532.7 1728.52   3 
   0  -2  11 98244.7 1181.69   3 
   0  -2  11 95566.8 1618.36   1 
   0  -2  11 98314.0 1610.05   2 
   0  -2 -11 95065.6 1676.92   3 
   0   2 -11 96651.4 1164.74   3 
   0  -2 -11 96847.7 1055.67   1 
   0   2  12 19237.0 832.406   3 
   0   2  12 17080.8 480.556   1 
   0  -2 -12 30150.1 1153.50   3 
   0   2 -12 24114.6 714.828   3 
   0  -2  12 17919.6 735.585   1 
   0  -2  12 29146.8 1060.88   2 
   0  -2 -12 18206.1 471.608   1 
   0  -2  12 19851.5 637.546   3 
   0  -2  13 111518. 1430.63   3 
   0   2 -13 109061. 1385.19   3 
   0  -2  13 112538. 1812.84   2 
   0  -2 -13 110567. 1196.03   1 
   0   2  13 109314. 1227.40   1 
   0   2  13 112551. 1967.45   3 
   0  -2  13 110376. 1811.72   1 
   0  -2 -13 115467. 1929.74   3 
   0  -2 -14 39105.7 1265.40   3 
   0   2  14 29610.9 669.693   1 
   0   2  14 32247.5 1124.73   3 
   0  -2  14 39791.9 1153.56   2 
   0  -2  14 30342.9 987.919   1 
   0  -2  14 32112.5 837.594   3 
   0   2 -14 33533.5 866.375   3 
   0  -2 -14 30628.0 649.219   1 
   0  -2 -15 25478.2 1050.87   3 
   0  -2  15 26069.3 936.249   2 
   0  -2  15 21108.6 836.367   1 
   0   2  15 20358.9 570.766   1 
   0   2  15 21406.3 925.559   3 
   0  -2 -15 19372.3 543.499   1 
   0   2 -15 23498.8 739.329   3 
   0  -2  15 20893.3 707.569   3 
   0  -2 -16 37600.5 1236.55   3 
   0   2  16 36887.5 797.566   1 
   0  -2  16 38286.0 978.525   3 
   0  -2  16 37905.0 1146.93   2 
   0  -2 -16 36788.4 773.917   1 
   0   2  16 37018.1 1250.55   3 
   0  -2  16 37099.1 1133.54   1 
   0   2 -16 38203.6 962.476   3 
   0  -2  17 11077.2 742.633   2 
   0  -2 -17 6619.28 344.646   1 
   0  -2  17 8245.33 525.190   3 
   0   2 -17 11741.8 632.066   3 
   0   2  17 7103.10 601.561   3 
   0  -2  17 6427.91 501.069   1 
   0   2  17 6646.52 366.587   1 
   0  -2 -17 13467.0 901.513   3 
   0   2 -18 56881.0 1257.86   3 
   0  -2  18 57468.1 1290.02   3 
   0  -2  18 57129.8 1422.06   2 
   0   2  18 59538.1 1650.03   3 
   0  -2 -18 57465.5 1595.98   3 
   0   2  18 57547.0 1048.36   1 
   0  -2  18 56429.6 1455.62   1 
   0  -2 -18 55356.9 1003.73   1 
   0   2  19 908.561 196.770   1 
   0  -2  19 1029.69 254.509   1 
   0  -2 -19 904.840 200.715   1 
   0  -2  19 4609.04 519.306   2 
   0   2  19 2346.92 422.480   3 
   0  -2 -19 4428.46 640.118   3 
   0  -2  19 2240.77 346.120   3 
   0   2 -19 2971.81 423.819   3 
   0   2  20 5704.08 354.208   1 
   0   2 -20 5838.97 455.937   3 
   0  -2 -20 5127.93 335.593   1 
   0  -2  20 5761.87 445.834   3 
   0  -2 -20 5284.91 535.141   3 
   0  -2  20 5278.58 477.652   1 
   0  -2  20 5598.63 488.044   2 
   0  -2  21 6661.29 560.530   2 
   0   2 -21 8018.35 547.686   3 
   0   2  21 6506.57 369.635   2 
   0  -2  21 6402.75 527.752   1 
   0   2  21 7159.28 418.339   1 
   0  -2  21 7108.69 511.357   3 
   0  -2 -21 7925.52 685.472   3 
   0  -2 -21 7098.49 401.811   1 
   0   2  22 18271.2 616.335   2 
   0  -2  22 17941.5 826.276   3 
   0  -2 -22 18921.3 1030.19   3 
   0   2  22 18377.3 686.564   1 
   0  -2 -22 17391.8 643.623   1 
   0   2 -22 18406.0 848.890   3 
   0  -2  22 19238.7 902.064   2 
   0  -2  22 16982.0 866.521   1 
   0  -2  23 14085.7 796.458   2 
   0   2 -23 14245.3 761.032   3 
   0   2  23 14717.3 560.691   2 
   0   2  23 14306.4 615.156   1 
   0  -2  23 14522.0 775.518   3 
   0  -2  23 14190.7 800.736   1 
   0  -2 -23 14830.3 939.347   3 
   0  -2 -23 13891.4 577.885   1 
   0   2  24 1422.56 289.255   1 
   0   2  24 1788.85 259.880   2 
   0  -2 -24 1332.60 241.501   1 
   0  -2 -24 3876.02 732.541   3 
   0  -2  24 2626.67 472.288   2 
   0  -2  24 1571.86 354.975   3 
   0  -2  24 1174.74 275.145   1 
   0   2 -24 2950.28 484.358   3 
   0  -2  25 46188.2 1482.07   2 
   0  -2 -25 45875.8 1117.88   1 
   0   2  25 47069.1 1061.10   2 
   0  -2  25 45947.9 1430.03   3 
   0   2  25 46841.7 1152.15   1 
   0  -2  25 46580.8 1507.30   1 
   0   2 -25 49736.1 1456.44   3 
   0  -2 -25 46254.3 1690.41   3 
   0  -2 -26 8111.00 811.655   3 
   0  -2  26 6627.02 595.427   1 
   0  -2  26 9141.79 696.188   2 
   0   2  26 7656.50 458.047   2 
   0   2 -26 8961.14 687.494   3 
   0  -2  26 7435.27 625.080   3 
   0   2  26 6794.13 481.737   1 
   0   2  27 289.036 143.677   2 
   0  -2  27 690.313 287.008   2 
   0   2  27 59.1739 115.444   1 
   0  -2 -27-37.2399 287.147   3 
   0   2 -27 440.895 243.397   3 
   0  -2  28 1173.28 327.325   2 
   0  -2 -28 1015.78 346.650   3 
   0   2 -28 1164.91 299.755   3 
   0   2  28 932.211 188.834   1 
   0   2  28 918.564 166.501   2 
   0  -2 -29 9306.90 828.815   3 
   0   2 -29 9276.66 707.339   3 
   0   2  29 9439.23 550.864   1 
   0   2  29 9222.26 513.386   2 
   0  -2  29 9040.75 726.985   2 
   0   2 -30 1886.28 447.117   3 
   0   2  30 956.677 236.491   2 
   0  -2  30 1315.04 405.007   2 
   0   2  30 1162.68 282.713   1 
   0  -2 -30 1302.46 504.113   3 
   0   2  31 23310.1 852.683   2 
   0  -2 -31 23619.2 1341.14   3 
   0   2 -31 24511.2 1201.34   3 
   0  -2  31 21923.9 1150.38   2 
   0  -2  32 14124.9 953.763   2 
   0  -2 -32 14642.2 1097.28   3 
   0   2  32 14292.8 677.353   2 
   0   2 -32 14797.1 973.772   3 
   0   2  33 705.095 206.646   2 
   0   2 -33 1491.68 421.250   3 
   0  -2 -33 840.697 401.276   3 
   0  -2  33 991.499 320.692   2 
   0  -2  34 4044.64 563.779   2 
   0  -2 -34 4141.07 683.599   3 
   0   2 -34 4623.91 611.312   3 
   0  -2  35 14866.8 1000.54   2 
   0   2 -35 14860.9 1032.61   3 
   0  -2 -35 14936.5 1173.11   3 
   0  -2 -36 9281.45 978.017   3 
   0  -2  36 9125.84 803.066   2 
   0   2 -36 9254.29 824.447   3 
   0   2 -37 2159.30 486.471   3 
   0  -2  37 2269.99 437.143   2 
   0  -2 -37 2010.03 539.673   3 
   0   2 -38 5731.94 676.614   3 
   0  -2 -38 5335.29 775.616   3 
   0  -2  38 5133.78 627.964   2 
   0  -2 -39 5628.73 773.043   3 
   0   2 -39 6666.13 742.331   3 
   0   2 -40 477.793 298.159   3 
   0  -2 -40 467.079 370.341   3 
   0   2 -41 1043.03 375.935   3 
   0  -2 -41 1093.29 438.299   3 
   0  -2 -42 128.676 319.339   3 
   0   2 -42 123.409 295.044   3 
   0  -2 -43 139.563 344.249   3 
   0  -2 -44 577.903 359.760   3 
   0   3   0 65.7792 97.2871   3 
   0   3   0 2.20879 156.687   2 
   0  -3   0-329.477 142.500   3 
   0   3  -1 77.1168 148.585   2 
   0   3   1 281.025 150.136   2 
   0   3   1-11.0918 116.594   3 
   0   3  -1 31.5667 89.3978   3 
   0  -3   1 85.6448 217.160   2 
   0  -3   1 30.3660 106.433   3 
   0  -3  -1-31.4508 128.538   3 
   0   3   2-74.8678 139.167   3 
   0  -3  -2 141.298 154.957   3 
   0   3  -2 18.7674 166.473   2 
   0  -3   2 28.0560 92.6545   3 
   0   3  -2-7.38985 73.7544   3 
   0  -3   2 521.080 236.778   2 
   0   3   2 81.4931 157.941   2 
   0  -3   3-25.9534 216.503   2 
   0   3   3 171.102 133.349   2 
   0   3   3 20.3226 141.902   3 
   0  -3  -3-78.9751 162.482   3 
   0   3  -3-76.3497 175.692   2 
   0   3   4 220.902 181.062   3 
   0  -3   4 180.219 233.683   2 
   0   3  -4 22.7103 196.247   2 
   0  -3  -4 49.5946 190.237   3 
   0   3   4 226.866 139.932   2 
   0  -3  -4 490.701 170.273   2 
   0   3  -5 41.8199 189.650   2 
   0  -3   5-95.8744 262.165   2 
   0  -3  -5-49.8437 185.563   3 
   0   3   5 100.896 163.808   3 
   0   3   5 16.4908 120.723   2 
   0  -3  -6 4.22492 211.128   3 
   0   3   6-185.822 191.814   3 
   0   3   6 68.8734 115.442   2 
   0  -3   6-29.3645 227.002   2 
   0   3  -6 2.13757 166.089   2 
   0  -3   7-144.198 240.558   2 
   0   3   7-115.447 107.786   2 
   0   3   7 54.1186 221.582   3 
   0  -3  -7-287.434 169.737   2 
   0  -3  -7-219.634 213.591   3 
   0   3  -7 155.877 214.242   2 
   0  -3  -8 57.5677 117.546   2 
   0   3   8 14.1330 101.858   2 
   0  -3   8-143.345 259.229   2 
   0  -3  -8 25.1737 219.038   3 
   0   3  -8 573.195 256.914   2 
   0   3   8 99.5676 176.505   3 
   0  -3   9 15.1017 243.316   2 
   0  -3  -9 158.427 134.054   2 
   0   3   9 51.7699 101.370   2 
   0   3   9 35.9453 206.979   3 
   0  -3  -9 323.134 227.508   3 
   0   3  -9 28.1209 170.077   2 
   0   3  -9 68.7270 61.4138   3 
   0  -3 -10-33.3122 123.330   1 
   0   3 -10 22.8616 67.1329   3 
   0   3  10 21.5466 220.865   3 
   0  -3 -10 131.938 236.857   3 
   0   3 -10 212.969 220.020   2 
   0   3  10-30.2515 92.8248   2 
   0  -3  10-3.58939 234.794   2 
   0  -3  11 274.506 234.870   2 
   0   3  11-197.420 189.348   3 
   0   3 -11-17.3413 77.0548   3 
   0   3  11 58.7066 80.8340   2 
   0  -3 -11 34.0131 106.133   1 
   0   3  12-14.8908 79.9222   2 
   0  -3  12 69.7870 152.394   1 
   0   3 -12 111.302 199.369   2 
   0   3 -12 44.9545 95.3864   3 
   0   3  12 81.5580 170.551   3 
   0  -3 -12-72.7140 111.134   1 
   0  -3  12 225.302 236.466   2 
   0  -3 -12 476.378 276.760   3 
   0   3  13 17.2406 217.002   3 
   0  -3  13-6.14940 164.043   1 
   0   3  13 146.841 79.7533   2 
   0  -3 -13 364.851 250.655   3 
   0  -3 -13 118.766 113.367   1 
   0   3 -13 183.664 115.936   3 
   0   3 -14 144.760 121.821   3 
   0  -3  14 225.840 236.773   2 
   0  -3  14-118.071 162.855   1 
   0  -3 -14 62.8220 234.827   3 
   0  -3 -14-2.94965 90.8976   1 
   0   3  14-36.1626 79.0058   2 
   0   3  14 339.218 208.065   3 
   0  -3  15-101.524 213.604   2 
   0   3 -15 77.7999 111.122   3 
   0  -3 -15 117.100 199.785   3 
   0  -3 -15-79.0685 94.7014   1 
   0   3  15-102.894 184.775   3 
   0  -3  15-108.704 118.598   3 
   0   3  15-11.6280 66.0324   2 
   0  -3  15 124.581 145.687   1 
   0  -3 -16-77.0555 90.5166   1 
   0  -3  16-94.4308 108.174   3 
   0  -3 -16-194.553 260.942   3 
   0   3  16-540.408 283.516   3 
   0   3 -16 264.569 133.038   3 
   0  -3  16-92.8815 165.868   1 
   0  -3  16-73.1298 212.468   2 
   0   3  16 110.449 79.8850   2 
   0  -3  17-76.6186 205.287   2 
   0  -3  17-93.1739 112.325   3 
   0   3 -17 130.423 136.376   3 
   0  -3 -17-29.0361 84.5025   1 
   0   3  17-275.972 221.483   3 
   0  -3 -17 169.071 215.604   3 
   0   3  17 40.5456 74.1314   2 
   0  -3  17 59.2287 152.999   1 
   0   3 -18-51.4340 136.841   3 
   0  -3 -18 115.221 90.3136   1 
   0  -3 -18 38.1895 273.690   3 
   0   3  18-47.4107 74.8626   2 
   0  -3  18-74.4666 103.211   3 
   0  -3  18-151.758 145.924   1 
   0  -3  18 108.344 191.739   2 
   0  -3  19 44.9196 130.232   3 
   0  -3 -19-112.459 95.1135   1 
   0   3 -19-100.968 126.752   3 
   0  -3  19 213.672 177.737   1 
   0   3  19-53.8092 80.1338   2 
   0  -3  19-250.223 200.623   2 
   0   3  20-26.0835 83.4772   2 
   0  -3 -20-121.040 109.839   1 
   0  -3  20-123.118 147.737   3 
   0  -3  20-138.549 150.216   1 
   0  -3  20 134.334 211.390   2 
   0   3 -20 248.229 157.688   3 
   0  -3 -20-131.141 231.260   3 
   0   3 -21-80.2740 165.451   3 
   0  -3  21-19.0615 119.908   3 
   0  -3  21 70.2856 167.413   1 
   0  -3  21-101.246 199.410   2 
   0  -3 -21 68.7245 96.7064   1 
   0  -3 -21 245.257 271.649   3 
   0  -3  22-103.370 128.905   3 
   0  -3 -22 638.082 306.378   3 
   0  -3  22 564.406 234.140   1 
   0  -3  22 4.73832 195.423   2 
   0   3 -22 83.5971 147.772   3 
   0  -3 -22-30.0806 88.8372   1 
   0  -3  23-64.4772 211.970   2 
   0  -3 -23 523.848 348.881   3 
   0  -3 -23 74.7061 104.707   1 
   0  -3  23 49.7501 118.758   3 
   0   3 -23 96.9502 139.108   3 
   0  -3  24-135.399 182.547   3 
   0   3  24 115.278 96.1570   2 
   0  -3  24-118.673 228.369   2 
   0  -3 -24-100.835 111.216   1 
   0  -3 -24 48.4261 286.895   3 
   0   3 -24-0.21338 150.141   3 
   0   3 -25-6.32068 167.270   3 
   0  -3  25-64.1097 208.626   2 
   0  -3 -25-54.6859 105.779   1 
   0  -3  25-111.649 153.583   3 
   0   3  25 23.5246 78.0518   2 
   0  -3 -25-142.827 308.473   3 
   0  -3  26-360.582 238.158   2 
   0  -3 -26-450.891 342.276   3 
   0   3  26-125.872 86.4139   2 
   0   3 -26-60.6981 205.031   3 
   0  -3 -26 75.4934 113.272   1 
   0  -3  26 57.0370 131.507   3 
   0  -3 -27-255.413 311.894   3 
   0  -3 -27 7.43557 100.435   1 
   0  -3  27 86.6153 206.405   2 
   0  -3  27 136.293 156.047   3 
   0   3  27 45.4333 81.9129   2 
   0   3 -27-89.7533 168.796   3 
   0   3  27 25.7800 89.5484   1 
   0   3  28-105.021 98.3832   1 
   0  -3  28 378.436 240.140   2 
   0   3 -28-285.664 203.029   3 
   0  -3 -28-206.330 293.338   3 
   0  -3  28-170.779 201.424   3 
   0   3  28 49.3156 75.5008   2 
   0   3 -29-102.040 214.065   3 
   0  -3 -29-395.254 300.042   3 
   0  -3  29 127.189 229.365   2 
   0   3  29 15.1686 80.8649   2 
   0  -3 -30-225.991 348.785   3 
   0   3 -30-272.635 204.175   3 
   0  -3  30 94.9197 206.499   2 
   0   3  30-78.0349 88.9447   2 
   0   3  31 12.6628 86.7670   2 
   0   3 -31 1.42806 178.963   3 
   0  -3 -31-291.918 297.872   3 
   0  -3  31-365.896 260.372   2 
   0  -3  32-24.9055 213.671   2 
   0   3 -32 176.873 199.665   3 
   0  -3 -32 278.017 294.850   3 
   0   3 -33-53.2875 230.817   3 
   0  -3  33-216.861 232.913   2 
   0  -3 -33-41.2657 302.490   3 
   0  -3  34-179.753 210.617   2 
   0   3 -34 21.1465 227.400   3 
   0  -3 -34 45.6341 256.964   3 
   0   3 -35 224.616 236.717   3 
   0  -3  35 311.300 267.158   2 
   0  -3 -35-169.279 307.342   3 
   0   3 -36 440.396 277.975   3 
   0  -3  36 485.291 305.875   2 
   0  -3 -36 300.104 433.107   3 
   0  -3 -37-69.9544 307.355   3 
   0  -3  37 410.616 283.147   2 
   0   3 -37 495.501 300.988   3 
   0  -3  38 688.673 321.698   2 
   0  -3 -38 297.721 366.682   3 
   0   3 -38 80.5878 225.436   3 
   0   3 -39 168.787 291.661   3 
   0  -3 -39-20.1268 332.617   3 
   0  -3  39 226.442 279.679   2 
   0  -3 -40-61.4238 291.720   3 
   0  -3 -41 77.2390 307.364   3 
   0  -3 -42-16.4739 309.836   3 
   0  -3 -43-643.141 445.931   3 
   0   4   0 4243.47 361.019   2 
   0  -4   0 6509.97 542.702   2 
   0   4   0 4530.07 292.644   3 
   0  -4   0 4129.01 284.634   3 
   0   4   1 2486.47 287.750   2 
   0  -4  -1 2866.25 268.677   3 
   0   4  -1 2198.70 292.276   2 
   0  -4   1 2731.72 222.579   3 
   0  -4   1 2783.47 368.547   2 
   0   4   1 3359.15 300.589   3 
   0   4  -1 3401.30 272.547   3 
   0   4  -2 39929.3 1076.18   2 
   0   4  -2 43668.1 726.815   3 
   0   4   2 42460.5 948.705   3 
   0   4   2 40830.7 991.869   2 
   0  -4  -2 41083.5 875.243   3 
   0  -4   2 38803.0 668.539   3 
   0  -4  -2 35851.5 882.874   2 
   0  -4   2 42487.3 1092.43   2 
   0  -4  -3 136678. 1754.81   2 
   0   4   3 143647. 1783.60   3 
   0  -4  -3 143714. 1714.75   3 
   0   4  -3 142176. 1153.22   3 
   0   4   3 147593. 1812.70   2 
   0  -4   3 142574. 2051.97   2 
   0  -4   3 146205. 1143.29   3 
   0   4  -3 145645. 2052.08   2 
   0   4  -4 15177.6 366.210   3 
   0  -4  -4 16342.8 786.972   3 
   0   4  -4 15407.9 719.806   2 
   0  -4  -4 10877.3 412.339   2 
   0   4   4 15747.6 617.935   2 
   0  -4   4 15817.8 762.394   2 
   0   4  -5 405004. 3597.88   2 
   0   4   5 405469. 3231.23   3 
   0  -4  -5 404024. 2859.74   2 
   0   4   5 398516. 2920.78   2 
   0  -4   5 398942. 3583.61   2 
   0  -4  -5 397659. 3148.86   3 
   0  -4  -6 11483.4 488.821   2 
   0  -4   6 10938.5 706.843   2 
   0   4   6 12374.8 747.729   3 
   0   4  -6 10345.1 618.595   2 
   0   4   6 9889.99 468.995   2 
   0   4   7 54186.5 1028.77   2 
   0  -4   7 52446.4 1369.30   2 
   0  -4  -7 60373.6 1083.46   2 
   0   4   7 56673.6 1303.39   3 
   0  -4  -7 53480.4 1259.61   3 
   0   4  -7 54417.0 1370.62   2 
   0   4  -8 1902.48 319.783   2 
   0  -4   8 1980.70 465.308   2 
   0   4   8 1749.95 220.980   2 
   0  -4  -8 1401.99 156.151   2 
   0   4   8 2031.97 332.289   3 
   0   4   9 2289.57 225.314   2 
   0  -4   9 2833.59 462.556   2 
   0   4  -9 1984.35 323.690   2 
   0   4   9 2250.29 331.732   3 
   0  -4  -9 3407.83 427.998   3 
   0  -4  -9 2212.44 213.910   2 
   0   4 -10 11705.6 695.481   2 
   0   4  10 12447.8 702.194   3 
   0  -4 -10 15337.1 830.379   3 
   0   4  10 11634.7 451.987   2 
   0  -4 -10 12058.4 453.695   2 
   0  -4  10 13620.3 831.648   2 
   0  -4 -11 71254.0 1625.45   3 
   0  -4  11 69760.9 1685.98   2 
   0  -4 -11 70829.0 1059.02   2 
   0   4  11 66569.6 1058.57   2 
   0   4  11 71244.7 1664.05   3 
   0   4 -11 67868.3 1646.88   2 
   0  -4 -12 41798.1 1309.34   3 
   0   4 -12 35941.2 1225.79   2 
   0  -4  12 39034.8 1323.26   2 
   0  -4 -12 38024.6 870.436   1 
   0   4  12 36337.9 771.364   2 
   0   4  12 38605.5 1260.71   3 
   0   4 -12 35189.2 502.788   3 
   0   4  13 49.0725 92.9590   2 
   0   4 -13 415.502 121.989   3 
   0   4 -13 324.884 195.496   2 
   0  -4 -13-45.6681 110.529   1 
   0  -4  13 1929.38 481.456   2 
   0  -4 -13 1709.21 502.295   3 
   0   4  13 163.770 216.002   3 
   0  -4 -14 10787.5 459.437   1 
   0  -4 -14 11171.5 708.513   3 
   0  -4  14 10426.0 691.606   1 
   0   4  14 10604.4 701.419   3 
   0   4  14 9985.12 386.458   2 
   0   4 -14 10028.3 672.912   2 
   0  -4  14 10323.4 708.436   2 
   0   4 -14 10235.6 346.459   3 
   0  -4 -15 5756.78 338.302   1 
   0  -4  15 5381.50 551.926   2 
   0   4 -15 5449.10 280.718   3 
   0   4  15 5305.98 286.839   2 
   0   4  15 5860.44 554.904   3 
   0  -4 -15 6104.86 572.333   3 
   0  -4  15 5270.28 520.207   1 
   0  -4  16 34.3116 163.280   1 
   0  -4 -16 711.124 346.063   3 
   0   4  16 107.996 82.9768   2 
   0  -4  16 1083.04 357.264   2 
   0   4 -16 580.271 154.917   3 
   0  -4 -16 138.485 110.992   1 
   0  -4  17 10969.2 747.996   2 
   0  -4 -17 11599.7 799.249   3 
   0  -4 -17 10559.2 456.086   1 
   0  -4  17 10918.7 737.813   1 
   0   4 -17 11197.0 437.627   3 
   0   4  17 10139.6 386.355   2 
   0   4  18 11027.1 406.561   2 
   0   4 -18 14657.9 560.059   3 
   0  -4  18 11102.6 771.900   1 
   0  -4 -18 11320.2 482.757   1 
   0  -4  18 16389.9 978.756   2 
   0  -4 -18 15067.3 1017.32   3 
   0  -4  19 55972.1 1699.38   2 
   0   4 -19 56034.5 1096.74   3 
   0  -4 -19 56599.4 1051.89   1 
   0  -4 -19 56607.3 1764.98   3 
   0   4  19 56694.9 897.186   2 
   0  -4  20 6086.43 717.254   2 
   0   4  20 3135.41 224.940   2 
   0   4 -20 5877.34 443.939   3 
   0  -4 -20 6474.39 790.312   3 
   0  -4 -20 3423.06 267.003   1 
   0   4 -21 15174.2 633.364   3 
   0  -4  21 15157.1 917.920   2 
   0   4  21 13528.6 442.597   2 
   0  -4 -21 14253.5 535.490   1 
   0  -4 -21 14943.8 984.808   3 
   0   4 -22 16112.8 687.710   3 
   0  -4  22 15545.8 992.696   2 
   0  -4 -22 12557.9 513.222   1 
   0   4  22 12440.4 437.837   2 
   0  -4 -22 16382.8 1092.13   3 
   0   4 -23 44116.8 1144.56   3 
   0  -4 -23 44331.6 959.302   1 
   0  -4 -23 45135.2 1700.78   3 
   0   4  23 44476.0 805.358   2 
   0  -4  23 44683.0 1603.36   2 
   0   4 -24 2152.35 354.665   3 
   0  -4 -24 717.783 163.542   1 
   0  -4  24 2906.94 532.460   2 
   0   4  24 713.235 133.918   2 
   0  -4 -24 2613.44 558.000   3 
   0   4  25-29.6926 60.0100   2 
   0  -4 -25 166.034 324.285   3 
   0   4  25 48.2066 74.0603   2 
   0  -4 -25 16.6479 95.8667   1 
   0  -4  25-253.664 215.850   2 
   0   4 -25 87.7798 138.254   3 
   0   4  26 112.741 87.9343   2 
   0  -4 -26 961.463 508.888   3 
   0   4  26 250.626 110.164   2 
   0  -4 -26 41.4664 124.884   1 
   0   4 -26 1078.44 322.660   3 
   0   4 -27 37208.1 1187.41   3 
   0  -4 -27 37565.0 916.276   1 
   0  -4 -27 36952.8 1661.56   3 
   0   4  27 35410.4 724.363   2 
   0  -4  27 34934.7 1528.61   2 
   0   4  27 35666.6 723.213   2 
   0  -4 -28 2239.62 577.150   3 
   0   4  28 959.751 151.102   2 
   0  -4 -28 888.301 187.566   1 
   0   4  28 1435.18 163.578   2 
   0   4 -28 1933.09 379.540   3 
   0  -4  29 1990.91 430.305   2 
   0   4 -29 2068.00 334.488   3 
   0  -4 -29 1563.58 370.141   3 
   0   4  29 1792.71 167.435   2 
   0  -4 -29 1884.92 221.767   1 
   0   4 -30 269.401 155.632   3 
   0  -4 -30-229.896 311.241   3 
   0  -4  30 319.553 292.240   2 
   0   4 -31 622.269 178.952   3 
   0  -4  31 273.956 223.338   2 
   0  -4 -31 529.224 308.327   3 
   0   4 -32 1062.05 326.868   3 
   0  -4  32 1329.52 402.447   2 
   0  -4 -32 1569.53 565.284   3 
   0  -4  33 17475.3 1184.67   2 
   0   4 -33 18112.0 968.915   3 
   0  -4 -33 17845.3 1318.98   3 
   0  -4  34 13509.2 1061.41   2 
   0  -4 -34 14186.1 1219.46   3 
   0   4 -34 13531.2 867.591   3 
   0   4 -35 1136.68 348.579   3 
   0  -4  35 1089.86 428.941   2 
   0  -4 -35 1288.14 515.651   3 
   0   4 -36 1056.20 362.705   3 
   0  -4  36 2195.95 533.444   2 
   0  -4 -36 1854.19 595.989   3 
   0  -4 -37 24115.0 1594.67   3 
   0  -4  37 24456.3 1455.25   2 
   0  -4  38 1849.53 436.050   2 
   0  -4 -38 2696.96 646.817   3 
   0  -4  39 344.543 336.965   2 
   0  -4 -39 294.282 384.703   3 
   0  -4  40 53.7528 289.537   2 
   0  -4 -40-182.951 324.864   3 
   0  -4 -41 1294.31 467.852   3 
   0  -4 -42 509.914 390.280   3 
   0  -5   0 17.5971 149.186   3 
   0   5   0 122.989 115.648   3 
   0   5   0 5.68554 167.582   2 
   0  -5   0 408.775 306.728   2 
   0  -5   1 58.8460 143.356   3 
   0  -5  -1-47.2668 152.412   3 
   0   5  -1-24.3748 115.975   3 
   0   5   1-139.083 185.317   2 
   0   5  -1 4.06457 148.435   2 
   0   5   1-92.3484 132.478   3 
   0   5  -2 98.0294 106.032   3 
   0  -5   2 61.4422 115.430   3 
   0  -5   2 344.434 263.931   2 
   0  -5  -2 78.2833 166.841   3 
   0   5   2 64.1389 129.905   3 
   0   5  -2 261.781 186.622   2 
   0   5   2 168.077 167.497   2 
   0   5  -3-43.8067 89.1721   3 
   0   5   3-46.5107 165.922   2 
   0   5  -3-98.4842 207.221   2 
   0  -5   3 8.90194 249.631   2 
   0  -5  -3 132.011 165.238   3 
   0   5   3-212.788 167.645   3 
   0  -5   3 224.564 115.349   3 
   0  -5  -4 69.6808 165.331   3 
   0   5   4-116.737 153.621   3 
   0   5  -4-13.1738 77.5166   3 
   0   5   4-74.5209 133.078   2 
   0  -5   4-7.71821 207.512   2 
   0   5  -4 140.828 175.544   2 
   0   5  -5 36.4530 156.120   2 
   0  -5  -5-658.539 301.964   2 
   0   5  -5 40.5383 57.7445   3 
   0  -5  -5-538.776 242.573   3 
   0  -5   5-192.402 210.791   2 
   0   5   5-46.0121 131.775   2 
   0   5   5-368.502 187.973   3 
   0  -5   6 140.889 247.892   2 
   0   5  -6-134.272 205.465   2 
   0   5   6-37.2815 158.531   2 
   0  -5  -6 296.735 174.141   2 
   0   5   6-104.427 173.051   3 
   0  -5  -6-500.241 230.841   3 
   0  -5  -7-159.007 221.494   3 
   0   5  -7-187.399 197.777   2 
   0   5   7 30.8936 172.573   3 
   0   5   7 72.0474 132.332   2 
   0  -5   7 172.685 222.401   2 
   0   5   8 63.4370 168.742   3 
   0   5  -8 21.7233 177.651   2 
   0  -5   8 406.347 270.862   2 
   0   5   8-94.2019 135.891   2 
   0  -5  -8-38.3881 202.488   3 
   0   5   9 143.725 123.185   2 
   0  -5  -9-143.659 212.821   3 
   0  -5  -9-54.6419 180.206   2 
   0  -5   9 116.296 259.575   2 
   0   5   9-126.791 194.267   3 
   0   5  -9-143.453 164.919   2 
   0  -5  10-159.864 234.678   2 
   0   5  10-35.4948 158.613   3 
   0   5  10 115.621 136.865   2 
   0  -5 -10 87.4179 124.249   2 
   0   5 -10 225.939 224.610   2 
   0  -5 -10 106.891 224.191   3 
   0  -5 -11-0.47821 212.579   3 
   0   5 -11 79.8613 188.520   2 
   0  -5  11 119.417 230.536   2 
   0  -5 -11-33.3826 117.917   2 
   0   5  11 59.1399 118.568   2 
   0   5  11 119.888 185.980   3 
   0  -5  12 25.8173 262.085   2 
   0  -5 -12-62.2731 246.926   3 
   0  -5 -12 186.880 152.070   2 
   0   5 -12 64.0128 184.641   2 
   0   5  12-111.150 193.804   3 
   0   5  12-36.2067 110.852   2 
   0   5  13 172.490 180.400   3 
   0   5 -13-88.5533 197.377   2 
   0  -5  13 190.037 242.826   2 
   0  -5 -13 40.7354 248.566   3 
   0   5  13-53.1624 94.5420   2 
   0  -5 -14 14.2872 132.275   1 
   0   5  14 103.250 98.2820   2 
   0  -5 -14 126.696 234.969   3 
   0   5  14 182.667 216.309   3 
   0  -5  14 360.331 224.170   2 
   0  -5 -15 91.1026 245.471   3 
   0  -5  15 213.099 222.203   2 
   0  -5 -15 5.24347 107.383   1 
   0   5  15 177.292 117.874   2 
   0  -5  16-133.097 250.795   2 
   0   5 -16 58.9168 45.5055   3 
   0   5  16 113.878 104.121   2 
   0  -5 -16 111.386 121.431   1 
   0  -5 -16-267.928 284.570   3 
   0   5  17 55.8178 86.2468   2 
   0  -5  17 132.929 239.921   2 
   0  -5 -17-291.023 152.945   1 
   0   5 -17-11.5942 50.1844   3 
   0  -5 -18-28.3492 104.341   1 
   0   5  18 45.3286 67.9409   2 
   0  -5  18 153.122 223.498   2 
   0   5 -18-26.0842 61.4940   3 
   0  -5  19 191.074 225.188   2 
   0   5 -19 25.0052 70.1746   3 
   0  -5 -19-130.786 313.936   3 
   0  -5 -19-62.1965 95.6392   1 
   0   5  19-65.6661 76.6120   2 
   0  -5 -20 68.1113 109.442   1 
   0  -5  20-207.925 268.971   2 
   0   5  20-110.571 74.8888   2 
   0   5 -20-25.6158 82.2071   3 
   0  -5 -20 243.147 217.114   3 
   0   5  21-90.7031 76.9282   2 
   0  -5  21 43.2324 240.552   2 
   0   5 -21-18.5070 86.2723   3 
   0  -5 -21-400.361 334.226   3 
   0  -5 -21-41.7452 106.160   1 
   0  -5 -22-43.8061 85.9453   1 
   0  -5  22 19.7024 249.062   2 
   0  -5 -22-195.238 265.614   3 
   0   5 -22 89.8733 99.0430   3 
   0   5  22-73.4204 77.1191   2 
   0   5 -23-18.3654 100.943   3 
   0  -5 -23-238.278 251.598   3 
   0  -5  23-86.4065 255.915   2 
   0  -5 -23-15.3712 99.0859   1 
   0   5  23-55.9052 64.7316   2 
   0  -5 -24 427.919 302.296   3 
   0   5  24-66.4817 62.2195   2 
   0  -5  24 58.4176 257.199   2 
   0   5 -24 8.17227 123.650   3 
   0  -5 -24 31.8346 87.4976   1 
   0  -5  25-108.941 268.413   2 
   0  -5 -25 228.590 246.465   3 
   0   5 -25-41.6997 108.827   3 
   0   5  25 20.0628 43.4141   2 
   0  -5 -25 59.0445 95.4637   1 
   0   5 -26-203.180 142.326   3 
   0  -5 -26-68.4064 102.875   1 
   0   5  26-110.330 63.5674   2 
   0   5  26-44.5417 40.4943   2 
   0  -5 -26 60.9215 268.391   3 
   0  -5  26-422.492 300.965   2 
   0   5 -27 7.96697 114.109   3 
   0  -5 -27 34.7815 82.3582   1 
   0   5  27-29.1293 35.2506   2 
   0  -5 -27 9.97809 273.390   3 
   0   5  27-11.5926 32.0953   2 
   0  -5  27 7.42591 245.870   2 
   0  -5 -28-346.134 302.129   3 
   0   5 -28 159.619 146.983   3 
   0  -5 -28 39.8462 107.005   1 
   0  -5  28 3.08186 251.431   2 
   0  -5  29-214.590 233.855   2 
   0  -5 -29 63.5477 347.787   3 
   0   5 -29-138.082 144.018   3 
   0  -5  30 113.765 254.465   2 
   0   5 -30-76.4905 140.402   3 
   0  -5 -30-400.012 388.242   3 
   0  -5  31 181.136 256.377   2 
   0   5 -31 200.911 146.439   3 
   0   5 -32 182.886 209.649   3 
   0  -5 -32-350.563 330.820   3 
   0  -5  32-24.5884 273.080   2 
   0  -5  33 93.9732 239.734   2 
   0  -5 -33 59.2366 350.791   3 
   0  -5 -34-28.7560 313.077   3 
   0  -5  34 244.816 306.126   2 
   0  -5  35 378.597 337.443   2 
   0  -5 -35 240.882 324.327   3 
   0  -5  36 213.341 296.038   2 
   0  -5 -36 1108.65 557.977   3 
   0  -5  37 708.478 398.847   2 
   0  -5 -37 296.596 372.387   3 
   0  -5 -38 676.633 432.135   3 
   0  -5  38-458.106 323.177   2 
   0  -5 -39 14.4172 329.398   3 
   0  -5  39-338.869 328.516   2 
   0  -5 -40 601.827 379.189   3 
   0  -5  40 401.558 314.577   2 
   0  -5  41-90.3436 301.184   2 
   0   6   0-124.815 191.810   2 
   0   6   0-123.076 139.327   3 
   0  -6   0 223.980 146.970   3 
   0   6   1 505.154 182.505   2 
   0   6   1 597.390 186.231   3 
   0  -6  -1 642.795 172.447   3 
   0  -6   1 876.526 329.305   2 
   0  -6   1 601.409 170.186   3 
   0   6  -1 543.086 229.338   2 
   0  -6  -1 210.927 267.863   2 
   0   6  -1 424.091 144.296   3 
   0  -6  -2 15427.3 767.957   2 
   0   6  -2 15769.9 553.399   3 
   0  -6  -2 15949.2 662.510   3 
   0   6  -2 15897.9 822.037   2 
   0   6   2 15831.2 791.604   2 
   0  -6   2 15620.2 844.422   2 
   0  -6   2 15106.3 552.208   3 
   0   6   2 15816.9 670.318   3 
   0  -6   3 16417.3 537.731   3 
   0   6  -3 17282.9 887.579   2 
   0   6   3 18457.9 750.441   3 
   0  -6   3 17048.6 881.146   2 
   0   6   3 18341.7 814.655   2 
   0  -6  -3 17924.9 806.235   2 
   0   6  -3 16654.8 549.262   3 
   0  -6  -3 16817.2 707.220   3 
   0  -6   4 9668.69 506.220   3 
   0  -6  -4 7556.59 503.206   3 
   0  -6   4 7608.62 598.212   2 
   0   6   4 7545.11 527.197   2 
   0   6  -4 7349.98 608.948   2 
   0   6  -4 7120.69 337.929   3 
   0  -6  -4 6911.04 510.755   2 
   0   6   4 7644.44 514.706   3 
   0  -6   5 1985.01 355.525   2 
   0   6  -5 1859.63 359.541   2 
   0  -6  -5 1228.10 253.446   3 
   0   6  -5 1531.57 149.321   3 
   0   6   5 1333.51 240.378   2 
   0   6   5 1806.01 275.709   3 
   0  -6  -5 1372.69 205.389   2 
   0   6  -6 4051.39 453.352   2 
   0   6  -6 4715.53 214.511   3 
   0  -6   6 4014.13 465.187   2 
   0  -6  -6 4560.00 429.866   3 
   0  -6  -6 4981.17 409.307   2 
   0   6   6 4849.05 435.295   3 
   0   6   6 4118.77 392.535   2 
   0   6   7 587.289 191.405   2 
   0  -6  -7 1023.57 272.732   2 
   0  -6   7 474.770 242.122   2 
   0   6  -7 448.068 164.421   2 
   0   6   7 528.717 224.875   3 
   0  -6  -7 600.550 204.547   3 
   0  -6  -8 794.448 273.337   3 
   0   6  -8 543.521 198.522   2 
   0  -6   8 831.384 372.030   2 
   0   6   8 691.421 197.044   2 
   0   6   8 710.706 234.587   3 
   0  -6  -8 1305.16 332.887   2 
   0  -6   9 16883.2 942.184   2 
   0  -6  -9 19026.4 788.274   2 
   0   6   9 18906.4 898.171   3 
   0   6   9 17660.0 739.247   2 
   0  -6  -9 17250.9 860.664   3 
   0   6  10 1538.37 314.059   3 
   0  -6 -10 2437.01 414.449   3 
   0  -6 -10 1640.06 238.707   2 
   0   6  10 1691.02 258.137   2 
   0  -6  10 2259.09 432.193   2 
   0  -6  11 1575.50 418.552   2 
   0  -6 -11 749.573 187.381   2 
   0   6  11 874.309 236.798   3 
   0  -6 -11 1147.68 323.338   3 
   0   6  11 1101.80 226.478   2 
   0  -6 -12 9865.36 707.375   3 
   0  -6 -12 11032.7 564.772   2 
   0  -6  12 10628.0 790.769   2 
   0   6  12 11225.7 743.108   3 
   0   6  12 10909.0 554.366   2 
   0   6  13 345.564 165.565   2 
   0  -6  13 560.988 322.177   2 
   0  -6 -13 235.893 255.959   3 
   0  -6 -13 265.498 155.985   2 
   0  -6 -14 4985.79 375.012   2 
   0   6  14 5096.83 385.389   2 
   0  -6 -14 4579.61 538.866   3 
   0  -6  14 5125.25 593.803   2 
   0  -6 -15 14041.8 663.983   1 
   0  -6 -15 13763.7 897.456   3 
   0  -6  15 14031.8 928.704   2 
   0   6  15 14392.8 599.813   2 
   0  -6 -16 9020.78 791.334   3 
   0   6  16 8946.36 485.265   2 
   0  -6  16 9721.92 838.460   2 
   0  -6 -16 8395.58 520.316   1 
   0  -6 -17 16503.8 1011.35   3 
   0  -6  17 18112.3 1076.58   2 
   0   6  17 17401.3 629.265   2 
   0  -6 -17 16927.5 714.489   1 
   0  -6  18 6481.52 697.406   2 
   0  -6 -18 6076.46 657.170   3 
   0  -6 -18 6443.35 444.121   1 
   0   6  18 6699.81 383.952   2 
   0  -6 -19 182.786 148.165   1 
   0   6  19 215.335 128.802   2 
   0   6  20 16311.2 564.013   2 
   0  -6 -20 15946.0 667.951   1 
   0  -6 -20 14748.6 1016.93   3 
   0  -6  20 15846.6 1055.46   2 
   0  -6  21 12049.0 939.089   2 
   0  -6 -21 11612.6 565.377   1 
   0   6 -21 10755.8 337.997   3 
   0  -6 -21 11527.8 932.482   3 
   0   6  21 12353.0 480.294   2 
   0   6 -22 422.813 95.2874   3 
   0  -6  22 507.427 318.027   2 
   0  -6 -22 494.465 153.483   1 
   0   6  22 466.251 117.665   2 
   0  -6 -22 572.688 405.843   3 
   0  -6 -23 2751.15 518.478   3 
   0  -6 -23 2228.21 254.453   1 
   0  -6  23 2499.19 508.001   2 
   0   6  23 2054.30 188.241   2 
   0   6 -23 2140.14 184.196   3 
   0  -6 -24 2169.49 248.016   1 
   0  -6 -24 2307.69 510.477   3 
   0   6  24 2075.41 176.984   2 
   0   6 -24 2444.21 215.634   3 
   0  -6  24 2650.15 531.181   2 
   0  -6 -25 8431.77 858.805   3 
   0   6 -25 8646.23 411.851   3 
   0   6  25 7715.02 298.290   2 
   0  -6  25 8180.03 831.985   2 
   0  -6 -25 8327.17 453.525   1 
   0  -6  26 5455.95 728.652   2 
   0  -6 -26 6388.68 759.511   3 
   0   6 -26 6123.66 362.889   3 
   0  -6 -26 5941.38 381.579   1 
   0  -6 -27 1423.68 462.587   3 
   0  -6 -27 1085.49 174.648   1 
   0  -6  27 779.124 327.370   2 
   0   6 -27 1354.46 191.656   3 
   0  -6  28 2127.34 509.850   2 
   0  -6 -28 2735.58 631.719   3 
   0  -6  29 10949.9 991.756   2 
   0  -6 -29 12670.2 1096.62   3 
   0  -6 -30 3874.27 683.879   3 
   0  -6  30 4514.83 704.558   2 
   0  -6 -31 730.084 394.015   3 
   0  -6  31 1336.15 424.344   2 
   0  -6 -32 601.410 503.428   3 
   0  -6  32 214.766 382.070   2 
   0  -6  33 13434.0 1148.38   2 
   0  -6 -33 13773.7 1202.15   3 
   0  -6 -34 8159.54 1010.30   3 
   0  -6  34 6943.84 863.597   2 
   0  -6 -35 647.358 490.594   3 
   0  -6  35 492.912 408.951   2 
   0  -6 -36 6422.68 874.524   3 
   0  -6  36 7278.40 881.548   2 
   0  -6  37 914.824 408.742   2 
   0  -6 -37 1146.06 505.394   3 
   0  -6  38 669.569 405.665   2 
   0  -6 -38-119.959 337.444   3 
   0  -6  39 4736.94 774.059   2 
   0  -6 -39 6161.09 879.666   3 
   0  -6  40 102.846 319.746   2 
   0  -6  41 17.2879 305.821   2 
   0  -6  42 356.735 368.427   2 
   0  -7   0 60.2184 133.236   3 
   0   7   0-53.9282 131.477   3 
   0   7   0-39.0609 154.697   2 
   0  -7   0-356.786 297.682   2 
   0   7   1-245.543 158.863   2 
   0  -7  -1 40.7918 164.331   3 
   0  -7   1-197.140 229.973   2 
   0   7  -1-44.2439 117.693   3 
   0   7  -1 128.939 176.199   2 
   0  -7   1 103.669 147.239   3 
   0  -7  -1-249.500 258.565   2 
   0   7   1 74.5298 116.302   3 
   0  -7  -2-48.1899 149.375   3 
   0  -7   2 198.410 135.737   3 
   0   7  -2-81.7067 165.896   2 
   0   7   2 54.0311 134.791   3 
   0   7   2 161.461 188.201   2 
   0  -7  -2-245.329 243.197   2 
   0   7  -2 21.2294 104.867   3 
   0   7   3-109.447 150.259   3 
   0  -7  -3-197.215 187.737   2 
   0   7  -3 26.7456 160.498   2 
   0   7   3-195.680 165.372   2 
   0   7  -3 52.6738 117.263   3 
   0  -7  -3 33.2571 162.358   3 
   0  -7   3 227.936 273.502   2 
   0  -7   3 216.873 133.820   3 
   0  -7  -4 161.048 189.392   3 
   0  -7   4-142.657 221.223   2 
   0  -7  -4-98.8876 197.356   2 
   0   7   4-247.250 179.091   3 
   0   7   4-40.6121 156.649   2 
   0   7  -4 63.5923 95.2383   3 
   0  -7   5-214.432 235.042   2 
   0   7  -5 32.4601 74.0486   3 
   0  -7  -5-35.6983 178.516   2 
   0   7   5-149.335 164.623   3 
   0   7   5 112.892 142.719   2 
   0  -7  -5 4.80607 171.668   3 
   0   7  -6 41.9801 59.6545   3 
   0   7   6-138.031 181.507   3 
   0  -7  -6-76.1223 161.362   2 
   0   7   6 28.0870 133.642   2 
   0  -7   6-32.8160 247.220   2 
   0  -7  -6-137.147 204.658   3 
   0   7   7-180.885 207.334   3 
   0   7   7 33.1348 125.652   2 
   0  -7  -7-46.1587 189.616   3 
   0  -7   7 91.9705 240.462   2 
   0   7  -7 22.2493 43.6259   3 
   0  -7  -7 548.248 209.443   2 
   0   7   8 57.6824 176.060   3 
   0  -7  -8 58.2729 176.814   3 
   0  -7   8 121.253 235.373   2 
   0   7   8-58.7619 146.381   2 
   0  -7  -8 131.282 234.315   2 
   0   7   9-85.2734 134.237   2 
   0  -7   9-386.665 311.500   2 
   0   7   9 61.4670 150.092   3 
   0  -7  -9-258.486 210.712   3 
   0  -7 -10 517.494 197.691   2 
   0   7  10 19.1679 142.239   2 
   0  -7 -10 130.598 213.453   3 
   0  -7  10-140.178 331.257   2 
   0   7  10-27.7628 181.503   3 
   0   7  11-365.731 175.032   2 
   0  -7 -11-252.750 204.326   2 
   0  -7  11-165.715 258.683   2 
   0  -7 -11-107.940 230.464   3 
   0  -7 -12-44.7119 140.501   2 
   0  -7 -12-153.401 233.349   3 
   0  -7  12-92.6153 265.018   2 
   0   7  12-4.02772 113.158   2 
   0  -7 -13-32.6246 126.403   2 
   0  -7 -13-324.899 260.986   3 
   0   7  13-72.1904 139.788   2 
   0  -7  13-295.552 291.146   2 
   0   7  14-98.3792 118.963   2 
   0  -7  14-244.308 295.660   2 
   0  -7 -14-21.6581 128.934   2 
   0  -7 -14 166.685 243.540   3 
   0  -7 -15 251.565 238.543   3 
   0  -7  15 32.9168 244.764   2 
   0  -7 -15 3.62645 136.927   2 
   0   7  15-38.3749 104.663   2 
   0   7  16 65.7530 106.623   2 
   0  -7  16 135.180 223.133   2 
   0  -7  17-221.981 269.980   2 
   0  -7 -17-96.5844 132.421   1 
   0   7  17 113.118 108.476   2 
   0  -7 -17-330.400 325.847   3 
   0  -7 -18 8.53998 125.157   1 
   0  -7  18-174.412 325.618   2 
   0   7  18 84.3948 105.185   2 
   0  -7  19 13.6262 282.026   2 
   0   7  19 135.153 93.5644   2 
   0  -7 -19-7.51304 121.532   1 
   0  -7 -20-33.6691 121.666   1 
   0   7  20-60.0352 79.3002   2 
   0  -7 -20-279.945 342.690   3 
   0  -7  20-199.423 275.800   2 
   0   7  21 51.3356 74.0791   2 
   0  -7 -21 58.6675 141.773   1 
   0  -7 -21-44.9424 332.003   3 
   0  -7  21 400.370 303.376   2 
   0  -7 -22 103.457 146.892   1 
   0   7  22 95.4831 70.4259   2 
   0  -7  22 452.945 288.242   2 
   0  -7 -23 85.6085 127.621   1 
   0   7  23 139.928 80.8987   2 
   0  -7  23-91.2022 247.138   2 
   0  -7 -23-92.8296 330.305   3 
   0  -7 -24-648.501 363.074   3 
   0  -7 -24 54.8720 109.639   1 
   0  -7  25 200.567 298.322   2 
   0  -7 -25 84.5060 245.070   3 
   0  -7 -25-39.2077 103.438   1 
   0  -7 -26-215.945 325.106   3 
   0  -7  26-231.097 263.510   2 
   0  -7  27 55.9697 247.236   2 
   0  -7 -27-489.747 384.966   3 
   0  -7  28 85.8216 293.260   2 
   0  -7 -28-56.9719 314.837   3 
   0  -7  29-46.3693 285.618   2 
   0  -7 -29-297.504 393.210   3 
   0  -7 -30-175.981 414.879   3 
   0  -7  30-314.559 344.961   2 
   0  -7 -31-304.195 358.017   3 
   0  -7  31 414.447 343.257   2 
   0  -7 -32-170.393 396.807   3 
   0  -7  32-287.774 266.521   2 
   0  -7 -33-120.297 321.566   3 
   0  -7  33 541.094 365.695   2 
   0  -7  34 292.183 276.829   2 
   0  -7 -34 400.364 431.300   3 
   0  -7 -35 235.562 288.405   3 
   0  -7  35 190.568 316.482   2 
   0  -7 -36 153.288 367.369   3 
   0  -7  36-97.6923 277.758   2 
   0  -7  37 167.958 336.864   2 
   0  -7 -37 1060.96 491.157   3 
   0  -7  38 382.391 364.463   2 
   0  -7  39-40.9892 310.766   2 
   0  -7  40-68.4315 310.934   2 
   0  -7  41 530.056 428.234   2 
   0  -7  42-57.6118 287.817   2 
   0  -8   0 89188.0 1648.68   3 
   0  -8   0 93901.2 2263.06   2 
   0   8   0 91146.2 1706.26   3 
   0   8   1 12938.9 705.483   3 
   0  -8   1 11508.5 865.850   2 
   0  -8  -1 10692.9 638.242   3 
   0  -8  -1 11935.7 825.138   2 
   0  -8   1 11227.5 603.123   3 
   0   8  -1 12293.7 633.296   3 
   0  -8   2 37246.1 983.815   3 
   0  -8  -2 37357.2 1141.26   3 
   0   8  -2 36955.5 1011.32   3 
   0   8   2 37614.0 1186.89   3 
   0  -8   2 38339.9 1478.87   2 
   0  -8  -2 37440.8 1406.09   2 
   0  -8   3 2113.33 247.870   3 
   0  -8   3 1572.23 392.557   2 
   0  -8  -3 1143.70 236.048   3 
   0  -8  -3 1269.22 310.701   2 
   0   8  -3 2151.54 260.436   3 
   0   8   3 1734.07 332.837   2 
   0   8   3 2126.20 333.854   3 
   0  -8   4 884.501 343.749   2 
   0  -8  -4 612.130 208.407   3 
   0   8   4 502.014 170.783   3 
   0  -8  -4 207.591 212.910   2 
   0   8  -4 568.850 140.833   3 
   0   8   4 523.045 199.940   2 
   0   8   5 25.6959 181.784   2 
   0  -8  -5 200.789 235.336   2 
   0   8   5-173.285 173.399   3 
   0  -8  -5 68.8371 185.090   3 
   0  -8   5 461.235 320.291   2 
   0   8  -5 110.108 87.7802   3 
   0   8   6 1767.71 347.754   3 
   0  -8  -6 1881.57 379.282   3 
   0   8   6 2201.37 357.687   2 
   0   8  -6 1805.29 183.334   3 
   0  -8  -6 2171.40 365.470   2 
   0  -8   6 1498.84 422.374   2 
   0  -8  -7 35443.1 1279.37   2 
   0  -8   7 34561.0 1496.23   2 
   0   8   7 34434.5 1258.94   2 
   0   8  -7 32286.4 633.446   3 
   0   8   7 35306.0 1319.20   3 
   0  -8  -7 32459.6 1230.78   3 
   0   8   8 12215.1 772.459   2 
   0  -8   8 13854.4 1038.37   2 
   0   8   8 11672.3 791.772   3 
   0  -8  -8 11772.6 801.208   3 
   0  -8  -8 12004.9 776.558   2 
   0  -8   9 19239.3 1160.42   2 
   0   8   9 19343.8 935.490   2 
   0  -8  -9 18643.1 989.780   3 
   0  -8  -9 20418.8 968.380   2 
   0   8  10 9965.18 664.628   2 
   0  -8 -10 11343.1 731.726   2 
   0  -8 -10 9304.30 762.601   3 
   0  -8  10 10029.6 891.872   2 
   0   8  11 12826.1 746.662   2 
   0  -8 -11 13773.4 771.046   2 
   0  -8 -11 13527.6 884.534   3 
   0  -8  11 14656.2 1043.45   2 
   0  -8 -12 6498.56 697.371   3 
   0   8  12 5952.85 519.508   2 
   0  -8  12 8123.58 855.742   2 
   0  -8 -12 6452.48 530.027   2 
   0   8  13 19427.4 885.872   2 
   0  -8 -13 18438.3 1084.58   3 
   0  -8  13 19999.4 1238.35   2 
   0  -8 -13 20037.4 907.941   2 
   0   8  14 16160.6 792.814   2 
   0  -8  14 16121.7 1107.70   2 
   0  -8 -14 16809.3 808.775   2 
   0  -8 -14 15519.2 997.704   3 
   0  -8 -15 353.840 205.419   2 
   0   8  15 386.283 190.128   2 
   0  -8  15 129.560 288.292   2 
   0  -8 -15 5.20880 261.453   3 
   0  -8 -16 1095.75 244.107   2 
   0   8  16 1260.94 242.979   2 
   0  -8 -16 1221.08 343.283   3 
   0  -8  16 811.256 345.703   2 
   0  -8  17 561.201 321.603   2 
   0   8  17 206.281 136.575   2 
   0  -8 -17 62.4341 279.736   3 
   0  -8 -18 4301.23 639.841   3 
   0  -8  18 5312.11 724.414   2 
   0  -8 -18 3144.30 395.782   1 
   0   8  18 3470.56 353.088   2 
   0   8  19 21209.4 819.087   2 
   0  -8 -19 21161.1 1278.89   3 
   0  -8  19 21758.7 1350.41   2 
   0  -8 -19 21232.0 947.336   1 
   0  -8  20 17412.0 1258.84   2 
   0  -8 -20 16374.6 1161.41   3 
   0   8  20 15913.3 689.092   2 
   0  -8 -20 17096.7 845.028   1 
   0  -8  21 3851.97 794.255   2 
   0  -8 -21 1928.54 321.867   1 
   0  -8 -21 2910.47 720.754   3 
   0  -8  22 48790.2 2078.19   2 
   0  -8 -22 44933.8 1940.45   3 
   0  -8 -22 49080.7 1363.19   1 
   0  -8  23 3050.35 721.966   2 
   0  -8 -23 1970.15 668.219   3 
   0  -8 -24 11763.2 1042.17   3 
   0  -8  24 11467.7 1054.34   2 
   0  -8 -24 12922.7 680.922   1 
   0  -8 -25 881.539 411.473   3 
   0  -8  25 1418.08 472.662   2 
   0  -8 -26 480.180 376.793   3 
   0  -8  26 865.118 356.969   2 
   0  -8 -27 1331.85 362.796   3 
   0  -8  27 1816.67 483.687   2 
   0  -8 -28-374.113 401.111   3 
   0  -8  28-898.856 422.619   2 
   0  -8  29 31.1015 294.364   2 
   0  -8 -29-58.5186 332.205   3 
   0  -8 -30 4416.20 778.271   3 
   0  -8  30 4393.72 736.846   2 
   0  -8  31 5807.93 897.348   2 
   0  -8 -31 5084.98 896.794   3 
   0  -8  32 23419.5 1619.41   2 
   0  -8 -32 21629.9 1581.21   3 
   0  -8  33 1388.53 517.857   2 
   0  -8 -33 511.651 517.955   3 
   0  -8  34 247.469 366.182   2 
   0  -8 -34 293.624 370.052   3 
   0  -8  35 786.348 412.298   2 
   0  -8 -35 1435.78 573.331   3 
   0  -8  36 1360.98 513.180   2 
   0  -8  37 2686.45 643.982   2 
   0  -8  38 946.870 442.999   2 
   0  -8  39 835.486 389.699   2 
   0  -8  40 2459.73 626.933   2 
   0   9   0 149.548 142.564   3 
   0  -9   0-128.591 260.206   2 
   0  -9   0 470.854 212.053   3 
   0   9   1-58.1304 127.125   3 
   0  -9  -1 297.460 204.185   3 
   0  -9   1 206.285 231.600   2 
   0  -9  -1-20.7611 237.975   2 
   0   9  -1 61.8094 120.484   3 
   0  -9   1 41.5905 135.467   3 
   0  -9   2-256.193 231.542   2 
   0   9  -2-44.8309 104.208   3 
   0  -9  -2-86.7632 155.730   3 
   0  -9  -2 80.8926 225.498   2 
   0  -9   2 129.418 162.690   3 
   0   9   2 6.79252 138.592   3 
   0  -9  -3-278.491 283.688   2 
   0  -9   3 202.462 227.302   2 
   0  -9  -3 80.0873 161.095   3 
   0   9  -3 35.6912 104.637   3 
   0   9   3-75.3109 144.574   3 
   0  -9   4-433.763 289.696   2 
   0   9   4 53.7780 167.711   3 
   0  -9  -4 56.8741 160.537   3 
   0   9  -4-110.854 100.721   3 
   0  -9  -4-40.0907 238.936   2 
   0  -9  -5 75.6439 180.478   3 
   0  -9  -5-559.895 311.142   2 
   0  -9   5 32.1615 258.667   2 
   0   9  -5 17.3313 78.8394   3 
   0   9   5-154.006 191.957   3 
   0  -9   6-99.6432 324.091   2 
   0  -9  -6-160.657 224.868   3 
   0  -9  -6 110.531 215.728   2 
   0   9  -6 18.1451 75.1210   3 
   0   9   6-230.839 179.535   3 
   0  -9   7 40.7454 271.101   2 
   0  -9  -7 302.838 252.654   2 
   0  -9  -7-36.5483 183.199   3 
   0  -9  -8 786.052 297.760   2 
   0  -9  -8 37.8024 236.746   3 
   0  -9   8 139.360 225.268   2 
   0  -9  -9 191.549 281.436   2 
   0  -9   9 290.648 362.270   2 
   0  -9  -9-355.239 292.333   3 
   0  -9  10 428.762 275.690   2 
   0   9  10-77.2489 189.210   2 
   0  -9 -10 647.821 315.927   2 
   0  -9 -10-381.804 315.934   3 
   0  -9 -11-379.630 300.694   3 
   0   9  11 97.6155 157.218   2 
   0  -9 -11 300.020 201.405   2 
   0  -9  11-3.56754 307.964   2 
   0   9  12-104.176 161.464   2 
   0  -9 -12-125.504 212.016   3 
   0  -9 -12 61.1628 173.155   2 
   0  -9  12 42.4673 228.009   2 
   0  -9 -13-599.671 348.131   3 
   0   9  13-234.793 163.716   2 
   0  -9 -13-258.513 188.660   2 
   0  -9  13 8.20287 295.769   2 
   0  -9 -14-582.757 321.246   3 
   0  -9 -14 127.686 192.625   2 
   0   9  14-19.8992 139.542   2 
   0  -9  14-209.324 271.689   2 
   0  -9 -15 43.0774 269.285   3 
   0   9  15 52.1993 137.805   2 
   0  -9  15 33.9659 276.187   2 
   0  -9 -15 129.211 200.034   2 
   0  -9  16 399.744 269.592   2 
   0  -9 -16 200.486 192.000   2 
   0   9  16 188.452 144.250   2 
   0  -9 -16 2.76227 227.964   3 
   0  -9  17 40.4588 282.705   2 
   0   9  17-7.99998 114.281   2 
   0  -9 -17-44.4151 159.403   2 
   0  -9 -17-356.653 345.578   3 
   0  -9  18-65.9275 287.934   2 
   0  -9 -18-445.683 347.733   3 
   0  -9  19 350.488 357.456   2 
   0  -9 -19 4.44279 159.555   1 
   0  -9 -20 10.5619 188.450   1 
   0  -9 -20-344.403 330.221   3 
   0  -9 -21 200.219 167.685   1 
   0  -9  21 107.345 307.432   2 
   0  -9 -21-316.736 350.989   3 
   0  -9  22-149.062 333.455   2 
   0  -9 -22-400.660 369.688   3 
   0  -9 -22-11.5490 139.510   1 
   0  -9 -23-507.442 458.602   3 
   0  -9  23-289.045 359.924   2 
   0  -9  24-45.7258 325.550   2 
   0  -9 -24-923.160 494.415   3 
   0  -9 -25 18.1098 366.195   3 
   0  -9  25-319.800 344.481   2 
   0  -9  26 251.869 305.383   2 
   0  -9 -26-638.536 380.171   3 
   0  -9 -27-370.469 404.508   3 
   0  -9  27 119.390 324.980   2 
   0  -9 -28-462.772 362.912   3 
   0  -9  28-109.632 361.495   2 
   0  -9 -29 507.587 388.219   3 
   0  -9  29 464.180 443.902   2 
   0  -9 -30 22.0612 321.494   3 
   0  -9  30 141.099 416.897   2 
   0  -9 -31 484.137 375.984   3 
   0  -9  31-139.175 304.942   2 
   0  -9  32-27.2490 330.776   2 
   0  -9 -32 477.833 426.650   3 
   0  -9  33 218.912 404.613   2 
   0  -9 -33-166.115 317.549   3 
   0  -9  34 938.043 503.451   2 
   0  -9  35 313.176 475.391   2 
   0  -9  36 41.1370 310.526   2 
   0  10   0 22701.8 951.377   3 
   0 -10   0 22143.1 1256.12   2 
   0 -10   0 22798.0 935.847   3 
   0  10  -1 1962.79 296.491   3 
   0 -10  -1 2266.91 357.352   3 
   0 -10  -1 1949.41 432.223   2 
   0  10   1 1853.13 337.664   3 
   0 -10   1 1853.67 430.107   2 
   0 -10   1 1803.50 314.848   3 
   0  10  -2 196.620 133.678   3 
   0  10   2 393.047 203.441   3 
   0 -10  -2 213.505 214.483   3 
   0 -10  -2 61.0090 263.458   2 
   0 -10   2-157.981 261.372   2 
   0 -10  -3 12541.3 771.893   3 
   0  10   3 12244.6 766.301   3 
   0 -10  -3 12902.1 956.782   2 
   0 -10   3 12838.2 1018.21   2 
   0  10  -3 12563.5 636.123   3 
   0  10   4 1273.98 408.310   3 
   0 -10  -4 1253.55 401.443   2 
   0 -10  -4 773.881 328.146   3 
   0 -10   4 656.514 442.337   2 
   0  10  -4 464.151 191.082   3 
   0  10  -5 51533.9 1119.89   3 
   0 -10  -5 52256.4 1612.75   3 
   0 -10   5 56006.7 2076.08   2 
   0 -10  -5 53096.4 1861.52   2 
   0 -10  -6 22277.8 1210.44   2 
   0 -10   6 24654.6 1434.11   2 
   0 -10  -6 20777.4 1078.67   3 
   0 -10   7 21401.3 1339.04   2 
   0 -10  -7 24666.3 1252.60   2 
   0 -10  -7 22131.6 1104.50   3 
   0 -10   8 500.229 418.015   2 
   0 -10  -8 381.224 337.617   3 
   0 -10  -8 976.522 390.555   2 
   0 -10   9 2748.74 492.697   2 
   0 -10  -9 3018.60 439.610   3 
   0 -10  -9 4279.66 558.797   2 
   0 -10 -10 56.8083 214.405   3 
   0 -10  10 28.7200 317.799   2 
   0 -10 -11 377.084 298.344   3 
   0 -10  11-285.437 267.270   2 
   0 -10 -11-142.640 245.473   2 
   0 -10  12 14777.9 1149.45   2 
   0 -10 -12 14666.0 908.589   2 
   0 -10 -12 13147.8 955.621   3 
   0 -10 -13 5364.11 555.173   2 
   0 -10  13 6122.51 780.643   2 
   0 -10 -13 5489.02 690.891   3 
   0 -10  14 2474.99 612.873   2 
   0 -10 -14 1881.48 367.687   2 
   0 -10 -14 1817.86 454.083   3 
   0 -10 -15 10257.3 893.063   3 
   0 -10  15 12653.4 1110.73   2 
   0 -10 -15 12669.0 824.188   2 
   0 -10 -16 777.597 274.655   2 
   0 -10 -16 957.427 427.011   3 
   0 -10  16 1750.81 577.763   2 
   0 -10 -17 12479.8 793.009   2 
   0 -10 -17 11373.5 1000.07   3 
   0 -10  17 11747.4 1093.48   2 
   0 -10  18 11032.2 1094.02   2 
   0 -10 -18 11696.1 1058.09   3 
   0 -10 -18 12019.2 776.081   2 
   0 -10 -19 19171.5 1284.46   3 
   0 -10  19 19007.3 1422.96   2 
   0 -10 -19 20304.4 1082.32   1 
   0 -10 -20 1210.38 526.987   3 
   0 -10  20 1842.98 638.375   2 
   0 -10 -20 893.090 278.909   1 
   0 -10  21 11650.9 1120.51   2 
   0 -10 -21 11797.4 1046.89   3 
   0 -10 -22 2515.37 568.690   3 
   0 -10  22 1503.16 528.603   2 
   0 -10  23 1853.59 576.444   2 
   0 -10 -23 1491.74 505.475   3 
   0 -10  24 777.321 437.489   2 
   0 -10 -24 344.708 365.800   3 
   0 -10 -25-313.416 391.376   3 
   0 -10  25 669.608 425.709   2 
   0 -10  26 2103.58 558.728   2 
   0 -10 -26 2039.32 494.767   3 
   0 -10  27 2172.91 565.419   2 
   0 -10 -27 1616.10 506.241   3 
   0 -10  28 1627.67 552.339   2 
   0 -10 -28 244.132 325.966   3 
   0 -10 -29 1970.47 562.158   3 
   0 -10  29 257.928 358.003   2 
   0 -10  30 1812.01 534.984   2 
   0 -10 -30 1777.35 507.669   3 
   0 -10  31 503.857 373.742   2 
   0 -10 -31 364.846 406.085   3 
   0 -10  32 662.022 465.569   2 
   0 -11   0 26.1287 161.482   3 
   0 -11   0-246.515 258.635   2 
   0 -11  -1 75.2899 194.783   3 
   0 -11   1 314.312 252.515   2 
   0 -11  -1 16.9490 250.750   2 
   0 -11  -2-32.7113 181.140   3 
   0 -11  -2 56.0811 266.924   2 
   0 -11   2-241.954 243.362   2 
   0 -11  -3 419.582 254.201   3 
   0 -11  -3-211.627 261.046   2 
   0 -11   3-48.1522 299.738   2 
   0 -11  -4 266.327 276.891   3 
   0 -11  -4 158.139 277.042   2 
   0 -11   4-70.6727 274.013   2 
   0 -11   5-128.518 310.700   2 
   0 -11  -5 481.607 288.627   3 
   0 -11  -5 440.181 336.794   2 
   0 -11   6-164.235 310.294   2 
   0 -11  -6 511.600 312.477   2 
   0 -11  -6-38.1446 186.947   3 
   0 -11  -7 160.794 287.652   2 
   0 -11  -7-46.6033 226.264   3 
   0 -11   7-12.9272 312.394   2 
   0 -11  -8 697.026 327.650   2 
   0 -11   8-342.621 395.830   2 
   0 -11  -8 119.876 235.316   3 
   0 -11   9-341.110 345.684   2 
   0 -11  -9 76.3520 201.610   3 
   0 -11 -10 379.427 243.447   2 
   0 -11 -10-128.848 210.511   3 
   0 -11 -11 71.2227 207.922   2 
   0 -11 -11 101.957 252.951   3 
   0 -11  11 14.9352 279.919   2 
   0 -11 -12 306.449 270.809   3 
   0 -11 -12 14.0067 233.193   2 
   0 -11  12-182.920 339.971   2 
   0 -11 -13-24.6258 198.580   2 
   0 -11 -13 16.0527 236.784   3 
   0 -11  13-92.4293 321.466   2 
   0 -11  14-676.197 443.702   2 
   0 -11 -14-59.5212 237.316   2 
   0 -11 -14-15.8546 302.895   3 
   0 -11 -15-519.443 365.941   3 
   0 -11  15-476.086 407.244   2 
   0 -11 -15 20.7392 182.843   2 
   0 -11  16 300.564 340.262   2 
   0 -11 -16 129.714 190.588   2 
   0 -11 -16 27.0944 301.316   3 
   0 -11  17 283.824 338.364   2 
   0 -11 -17-325.114 317.566   3 
   0 -11 -17 316.577 221.395   2 
   0 -11 -18-170.068 285.448   3 
   0 -11  18 768.331 392.469   2 
   0 -11  19 253.737 388.383   2 
   0 -11 -19 0.69597 259.169   3 
   0 -11  20-70.3996 275.917   2 
   0 -11 -20-481.593 390.599   3 
   0 -11  21 235.426 330.274   2 
   0 -11 -21-473.927 352.821   3 
   0 -11 -22-404.063 322.184   3 
   0 -11  22-528.672 334.869   2 
   0 -11  23-138.217 351.881   2 
   0 -11 -23-397.648 348.215   3 
   0 -11  24-535.474 426.323   2 
   0 -11 -24-298.138 322.103   3 
   0 -11 -25 353.372 298.855   3 
   0 -11  25 382.491 385.439   2 
   0 -11 -26 328.964 382.792   3 
   0 -11  26 31.1980 315.584   2 
   0 -11  27 365.832 410.176   2 
   0 -11 -27-138.524 383.711   3 
   0 -11 -28-241.281 399.951   3 
   0 -11  28 248.529 357.004   2 
   0 -11 -29-495.237 417.709   3 
   0 -12   0 6172.83 762.110   2 
   0 -12  -1 1233.75 406.037   2 
   0 -12   1 1185.39 423.881   2 
   0 -12  -1 1548.07 320.999   3 
   0 -12  -2 1357.60 434.908   2 
   0 -12   2 1191.83 396.607   2 
   0 -12  -2 1600.55 328.527   3 
   0 -12  -3 3720.81 475.682   3 
   0 -12  -3 4200.13 642.845   2 
   0 -12   3 4263.80 679.706   2 
   0 -12   4 3176.75 621.365   2 
   0 -12  -4 2677.14 433.625   3 
   0 -12  -4 2681.02 544.540   2 
   0 -12  -5 5615.34 593.209   3 
   0 -12  -5 5794.73 729.024   2 
   0 -12   5 4800.54 718.787   2 
   0 -12  -6 1935.84 499.068   2 
   0 -12   6 1153.08 482.204   2 
   0 -12  -6 1153.76 362.114   3 
   0 -12  -7 4877.73 609.906   3 
   0 -12  -7 5443.54 694.956   2 
   0 -12   7 3726.62 664.615   2 
   0 -12  -8 1065.10 421.549   3 
   0 -12   8 917.372 429.014   2 
   0 -12  -8 1264.16 450.784   2 
   0 -12  -9 12366.6 952.816   3 
   0 -12  -9 13481.2 1031.80   2 
   0 -12   9 12568.9 1134.88   2 
   0 -12 -10 473.553 320.288   3 
   0 -12 -10 286.785 273.873   2 
   0 -12  10 709.855 365.023   2 
   0 -12  11 2288.31 596.978   2 
   0 -12 -11 1752.74 417.834   2 
   0 -12 -11 2992.01 523.146   3 
   0 -12 -12 5007.04 640.727   2 
   0 -12  12 3814.17 678.022   2 
   0 -12 -12 4568.64 638.972   3 
   0 -12  13 883.141 435.249   2 
   0 -12 -13 821.436 289.038   2 
   0 -12 -13 766.830 359.353   3 
   0 -12 -14 3062.35 578.565   3 
   0 -12  14 2904.27 628.269   2 
   0 -12 -14 3679.85 521.171   2 
   0 -12 -15 668.981 348.972   3 
   0 -12  15 558.647 422.221   2 
   0 -12  16 81.9930 432.522   2 
   0 -12 -16-50.1820 253.128   3 
   0 -12  17 1817.25 569.005   2 
   0 -12 -17 1640.06 504.379   3 
   0 -12 -18 5377.80 766.263   3 
   0 -12  18 4892.83 835.745   2 
   0 -12  19 3630.74 721.091   2 
   0 -12 -19 2491.58 557.932   3 
   0 -12 -20-202.866 297.818   3 
   0 -12  20 903.513 465.926   2 
   0 -12  21 621.679 346.136   2 
   0 -12 -21 779.392 422.223   3 
   0 -12  22 13.0452 329.371   2 
   0 -12 -22 485.074 356.993   3 
   0 -12 -23 455.389 402.936   3 
   0 -12  23 7.51692 310.490   2 
   0 -12  24 2168.61 631.291   2 
   0 -12 -24 1900.84 565.891   3 
   0 -12 -25 413.579 325.144   3 
   0 -12 -26 1077.96 519.889   3 
   0 -13   0 170.612 337.039   2 
   0 -13  -1-136.192 313.178   2 
   0 -13   1 75.0974 304.659   2 
   0 -13   2-55.6014 354.512   2 
   0 -13  -2-122.204 294.644   2 
   0 -13  -3-259.913 277.560   2 
   0 -13   3 442.869 310.613   2 
   0 -13   4 245.594 308.066   2 
   0 -13  -4 369.025 323.439   2 
   0 -13   5-281.455 303.743   2 
   0 -13  -5 227.915 334.173   2 
   0 -13  -5 194.118 231.727   3 
   0 -13   6-415.311 372.952   2 
   0 -13  -6 340.047 267.445   3 
   0 -13   7 279.671 344.380   2 
   0 -13  -7 541.459 402.185   2 
   0 -13  -7 321.634 275.710   3 
   0 -13  -8-218.054 241.022   3 
   0 -13   8-250.385 383.140   2 
   0 -13  -9-66.8173 260.955   2 
   0 -13   9 452.760 380.501   2 
   0 -13  -9 50.4107 210.125   3 
   0 -13 -10 155.901 237.637   3 
   0 -13  10-105.712 334.549   2 
   0 -13 -10-56.3777 254.159   2 
   0 -13 -11 383.509 294.147   2 
   0 -13 -11 176.730 238.637   3 
   0 -13 -12-581.133 347.427   2 
   0 -13 -12-61.8536 290.267   3 
   0 -13  12 243.224 353.665   2 
   0 -13 -13 420.357 350.374   3 
   0 -13  13 563.656 364.878   2 
   0 -13 -14 368.012 375.551   3 
   0 -13  14-42.9938 379.901   2 
   0 -13  15-173.015 371.094   2 
   0 -13 -15 41.6469 300.013   3 
   0 -13  16 140.494 369.467   2 
   0 -13 -16-1.43086 303.533   3 
   0 -13  17 3.46418 300.713   2 
   0 -13 -17-145.195 295.700   3 
   0 -13 -18 173.437 308.173   3 
   0 -13  18 844.259 476.887   2 
   0 -13  19 868.682 460.553   2 
   0 -13 -19 578.578 376.728   3 
   0 -13 -20 373.405 429.108   3 
   0 -13 -21 421.531 357.386   3 
   0 -13 -22-595.582 418.122   3 
   0 -13 -23 568.044 428.522   3 
   0 -13 -24 745.825 461.077   3 
   0 -14   0 1362.94 520.221   2 
   0 -14  -1 4915.84 777.591   2 
   0 -14   1 5064.25 791.267   2 
   0 -14   2 54.6169 339.135   2 
   0 -14  -2 94.7449 345.235   2 
   0 -14  -3 1878.46 543.717   2 
   0 -14   3 2156.65 551.201   2 
   0 -14  -4 624.000 420.736   2 
   0 -14   4 221.837 328.119   2 
   0 -14   5 322.539 373.477   2 
   0 -14  -5 480.268 425.801   2 
   0 -14   6 2357.08 615.999   2 
   0 -14  -6 3020.01 670.433   2 
   0 -14   7 10010.3 1102.52   2 
   0 -14  -7 12408.6 1132.36   2 
   0 -14   8 2523.54 664.490   2 
   0 -14  -8 2270.08 604.438   2 
   0 -14  -9 95.9487 301.200   2 
   0 -14   9 588.962 453.858   2 
   0 -14 -10 6000.74 769.277   2 
   0 -14  10 6467.79 953.848   2 
   0 -14  11 3141.28 745.206   2 
   0 -14  12 5689.09 892.443   2 
   0 -14 -12 4392.81 634.648   3 
   0 -14 -13 201.129 320.301   3 
   0 -14  13 464.570 475.010   2 
   0 -14 -14 3172.17 602.877   3 
   0 -14 -15 2862.56 586.661   3 
   0 -14 -16 1212.75 503.116   3 
   0 -14 -17 3410.91 681.668   3 
   0 -14 -18 3285.86 661.929   3 
   0 -14 -19 392.479 395.909   3 
   0 -14 -20 1168.28 515.603   3 
   0 -14 -21 1286.74 502.251   3 
   0 -15   0 484.707 381.068   2 
   0 -15  -1-183.449 315.172   2 
   0 -15   1-266.098 357.977   2 
   0 -15  -2-460.135 353.877   2 
   0 -15   2 356.497 428.614   2 
   0 -15   3 482.373 405.735   2 
   0 -15  -3 599.861 407.986   2 
   0 -15  -4 106.339 318.884   2 
   0 -15   4 99.7545 332.113   2 
   0 -15  -5 900.402 493.666   2 
   0 -15   5 296.087 340.472   2 
   0 -15  -6 69.3247 270.842   2 
   0 -15   6-121.827 327.293   2 
   0 -15  -7 15.9057 294.030   2 
   0 -16  -2 1222.88 521.001   2 
   0 -16  -3 1586.02 589.869   2 
   0 -16  -4 1671.32 567.824   2 
  -1   0   3 9.85322 79.1989   2 
   1   0  -3 63.0832 85.2111   2 
   1   0   3 43.6320 70.5598   1 
  -1   0  -3 117.534 99.2142   1 
  -1   0  -4 438448. 2307.04   1 
   1   0  -4 443707. 1846.28   2 
  -1   0   4 450606. 1839.23   2 
   1   0   4 451112. 2238.17   3 
  -1   0   5 235.335 97.5294   2 
  -1   0  -5 29.7019 108.832   3 
   1   0   5 109.966 97.3735   1 
   1   0   5 145.626 125.833   3 
   1   0  -5 13.0454 90.1660   2 
  -1   0  -5 23.8791 123.158   1 
   1   0  -6 567732. 2219.30   2 
  -1   0  -6 583854. 2914.16   1 
   1   0   6 566967. 2840.10   3 
   1   0  -6 562946. 2924.86   3 
  -1   0   6 560389. 2212.72   2 
  -1   0   7-202.609 105.627   2 
   1   0   7 0.82691 131.670   3 
  -1   0  -7-42.1731 139.323   1 
  -1   0  -7 348.554 164.230   3 
   1   0  -7 112.664 168.977   3 
   1   0  -7 10.8688 99.6692   2 
  -1   0  -8 476116. 2873.85   1 
  -1   0   8 474270. 2221.01   2 
   1   0   8 476675. 2873.45   1 
   1   0   8 475959. 2905.26   3 
  -1   0   8 476085. 2985.37   3 
  -1   0  -8 474369. 2827.98   3 
   1   0  -8 471287. 2987.73   3 
   1   0  -8 475163. 2220.12   2 
  -1   0  -9 7.17777 153.546   1 
   1   0   9 123.746 185.142   3 
  -1   0   9-187.805 171.683   3 
  -1   0  -9 439.270 203.031   3 
  -1   0   9-31.3458 108.977   2 
   1   0  -9-90.0508 112.882   2 
   1   0  -9-45.8881 183.526   3 
   1   0  10 67639.3 1152.72   1 
  -1   0  10 66505.6 899.702   2 
   1   0  10 65222.6 1188.67   3 
  -1   0 -10 64062.4 1153.16   3 
  -1   0 -10 65521.3 1135.26   1 
  -1   0  10 63804.3 1207.37   3 
   1   0 -10 63648.5 898.481   2 
   1   0 -10 64512.1 1214.78   3 
  -1   0  11-13.7717 97.5801   1 
  -1   0  11 152.537 135.270   2 
  -1   0  11 104.223 239.252   3 
   1   0 -11-83.7120 128.290   2 
   1   0  11-109.110 184.740   3 
  -1   0 -11 24.0165 172.919   1 
   1   0 -11 112.496 216.449   3 
  -1   0 -12 54854.9 1153.34   3 
   1   0  12 55901.6 1120.50   1 
  -1   0  12 55924.0 876.781   1 
   1   0  12 53464.5 1150.98   3 
  -1   0 -12 55455.8 1119.05   1 
   1   0 -12 54682.2 899.461   2 
   1   0 -12 52221.9 1206.55   3 
  -1   0  12 54287.0 1206.49   3 
  -1   0  12 55610.0 910.884   2 
   1   0  13 126.273 207.887   3 
   1   0 -13 402.255 288.808   3 
   1   0  13 1243.79 306.713   1 
  -1   0  13 582.769 279.119   3 
  -1   0 -13 904.324 409.501   3 
  -1   0  13 120.961 114.172   1 
  -1   0  13 383.998 213.215   2 
  -1   0 -13 305.508 217.188   1 
  -1   0  14 44621.9 1164.41   3 
  -1   0  14 42863.3 846.126   1 
   1   0  14 42839.9 1124.19   3 
   1   0  14 45593.3 1072.35   1 
   1   0 -14 43249.4 1148.24   3 
  -1   0  14 41700.0 868.198   2 
  -1   0 -14 42634.5 1047.47   1 
  -1   0 -14 45145.8 1119.43   3 
  -1   0  15 458.882 274.144   3 
   1   0  15 850.032 295.722   1 
  -1   0  15 467.128 250.711   2 
  -1   0  15 130.660 120.967   1 
   1   0  15-66.5145 164.129   3 
   1   0 -15 136.254 221.514   3 
  -1   0 -15 215.302 201.505   1 
  -1   0 -16 11577.2 577.156   1 
  -1   0 -16 12343.5 642.712   3 
   1   0  16 12111.4 590.868   1 
   1   0  16 11266.9 631.248   3 
   1   0 -16 11027.5 647.232   3 
  -1   0  16 11901.1 465.170   1 
  -1   0  16 12400.8 499.720   2 
  -1   0  16 11859.9 656.163   3 
   1   0  17 237.980 179.182   1 
   1   0  17 205.276 170.783   3 
  -1   0  17 409.650 198.608   2 
   1   0 -17 201.722 228.602   3 
  -1   0  17 406.075 235.332   3 
  -1   0 -17 289.052 171.562   1 
  -1   0  17 24.0862 110.386   1 
  -1   0  18 1445.00 304.131   3 
  -1   0 -18 974.027 216.509   1 
   1   0  18 1414.33 286.743   3 
   1   0 -18 1244.64 270.039   3 
  -1   0 -18 1122.80 273.097   3 
   1   0  18 1399.26 248.475   1 
  -1   0  18 1414.11 197.559   1 
  -1   0  18 1368.18 200.518   2 
  -1   0 -19 614.446 292.409   3 
  -1   0 -19 178.358 170.355   1 
  -1   0  19 70.1874 152.550   2 
   1   0  19-131.801 177.785   3 
   1   0  19 162.032 174.537   1 
  -1   0  19 15.7802 195.561   3 
   1   0 -19 123.356 245.583   3 
  -1   0  19-26.8423 91.3717   1 
  -1   0  20 8947.48 468.454   1 
   1   0 -20 9143.45 666.443   3 
  -1   0 -20 8830.15 612.757   3 
  -1   0  20 8602.03 616.169   3 
   1   0  20 9141.18 632.796   3 
  -1   0 -20 8999.74 575.623   1 
   1   0  20 9063.28 576.256   1 
  -1   0  20 8719.61 468.350   2 
  -1   0  21 184.333 185.857   3 
   1   0 -21 339.970 299.712   3 
   1   0  21 224.324 171.357   1 
   1   0  21 99.1638 169.399   3 
  -1   0 -21 216.828 167.148   1 
  -1   0 -21 234.033 245.036   3 
  -1   0  21 55.7453 112.047   1 
  -1   0  21 297.424 184.339   2 
   1   0 -22 510.300 254.190   3 
  -1   0 -22 757.735 239.297   1 
  -1   0  22 830.814 188.995   1 
   1   0  22 673.235 182.269   3 
  -1   0  22 844.925 233.868   3 
  -1   0 -22 731.269 238.957   3 
  -1   0  22 761.128 184.008   2 
   1   0  22 778.888 200.415   1 
  -1   0 -23 4.30324 211.029   3 
   1   0 -23 61.9074 215.514   3 
  -1   0  23-24.3553 93.8022   1 
  -1   0 -23 242.758 169.520   1 
   1   0  23 41.8251 137.417   1 
   1   0  23-69.5463 184.332   3 
  -1   0  23 27.6531 148.386   2 
   1   0  24 338.042 177.749   1 
   1   0 -24 336.112 212.526   3 
  -1   0  24 126.788 127.086   1 
  -1   0 -24 117.879 158.778   1 
  -1   0  24 253.974 139.856   2 
   1   0  24 17.0941 160.372   2 
  -1   0 -24 244.051 225.192   3 
  -1   0 -25 831.809 388.538   1 
  -1   0  25 1433.54 342.557   2 
   1   0  25 817.118 254.301   2 
  -1   0  25 649.814 221.838   1 
   1   0 -25 1318.98 617.298   3 
   1   0  25 1122.87 325.205   1 
  -1   0 -26 58299.8 1612.58   1 
   1   0  26 56501.2 1569.52   2 
   1   0 -26 59945.6 1824.37   3 
  -1   0  26 58206.6 1399.09   2 
   1   0  26 59804.2 1633.00   1 
  -1   0  26 60605.2 1396.51   1 
  -1   0 -26 58186.6 1808.26   3 
  -1   0  27 3251.94 445.627   1 
   1   0 -27 13062.4 1075.27   3 
  -1   0 -27 11819.7 1056.87   3 
   1   0  27 4708.85 592.401   1 
  -1   0  27 6895.10 654.675   2 
   1   0  27 5495.42 587.691   2 
  -1   0 -28 120137. 2646.86   3 
  -1   0  28 118117. 2045.64   1 
   1   0  28 116576. 2313.30   2 
   1   0 -28 119404. 2674.24   3 
  -1   0  28 117321. 2057.73   2 
   1   0  28 116072. 2347.26   1 
  -1   0  29 5850.54 591.676   2 
   1   0  29 4463.93 577.019   2 
   1   0  29 4544.97 549.393   1 
   1   0 -29 6980.86 794.063   3 
  -1   0 -29 6481.41 842.609   3 
  -1   0  29 3322.78 439.885   1 
  -1   0 -30 6218.65 660.276   3 
  -1   0  30 5232.39 492.878   2 
   1   0  30 5575.68 550.017   2 
   1   0  30 5624.35 556.459   1 
   1   0 -30 5943.64 644.191   3 
  -1   0  30 5518.59 472.567   1 
  -1   0  31 281.411 172.530   1 
   1   0 -31 709.017 383.090   3 
   1   0  31-30.7583 217.992   2 
  -1   0 -31 696.489 450.321   3 
  -1   0  31 362.139 210.877   2 
  -1   0  32 7347.53 553.200   2 
  -1   0 -32 7929.87 752.268   3 
   1   0 -32 8487.83 803.218   3 
   1   0  32 7379.42 642.333   2 
  -1   0 -33 118.474 237.410   3 
   1   0  33-13.4922 182.170   2 
  -1   0  33 130.324 148.475   2 
  -1   0 -34 400.632 271.090   3 
   1   0  34 634.586 257.628   2 
  -1   0  34 673.127 214.071   2 
   1   0 -34 573.025 315.456   3 
   1   0 -35-184.906 288.404   3 
  -1   0 -35-277.572 258.701   3 
   1   0  35 344.746 198.320   2 
   1   0  36 4074.38 511.846   2 
   1   0 -36 3845.50 575.305   3 
  -1   0 -36 3570.63 551.653   3 
   1   0  37 176.633 202.408   2 
  -1   0 -37 23.7694 275.676   3 
   1   0 -37 560.261 351.644   3 
   1   0 -38 1672.39 477.920   3 
  -1   0 -38 1581.87 401.125   3 
   1   0 -39 232.923 300.250   3 
  -1   0 -39 197.425 295.230   3 
  -1   0 -40 221.927 243.038   3 
   1   0 -40-219.414 307.142   3 
   1   0 -41-129.922 302.197   3 
  -1   0 -41 210.426 251.214   3 
  -1   0 -42 1902.25 519.108   3 
   1   0 -42 1394.63 457.825   3 
   1   0 -43 857.689 427.174   3 
  -1   0 -43 499.579 391.836   3 
   1   0 -44-268.120 340.014   3 
  -1   0 -44-40.9382 264.614   3 
  -1   0 -45 310.063 364.511   3 
   1   0 -45 48.6180 293.167   3 
  -1   0 -46 1161.42 466.625   3 
   1   0 -46 583.022 353.402   3 
  -1   0 -47 272.806 335.419   3 
   1   0 -47-135.214 277.511   3 
   1  -1   0 392.419 93.3338   1 
   1   1   0 83.9250 74.5036   2 
  -1   1   0 341.903 129.472   1 
   1  -1   1 14121.6 387.613   1 
  -1   1   1 35582.7 521.897   1 
  -1  -1  -1 37096.9 646.633   2 
   1  -1  -1 28484.9 479.363   1 
  -1  -1   1 38558.8 662.423   2 
  -1   1  -1 36349.2 617.493   1 
  -1  -1   2 20316.8 502.928   2 
   1   1   2 19285.5 484.081   3 
   1   1   2-57.0264 78.6538   2 
  -1  -1  -2 19776.9 491.693   1 
   1  -1   2 4976.44 261.068   1 
   1  -1  -2 19731.0 357.858   1 
  -1   1   2 19201.1 359.856   1 
  -1   1  -2 19867.0 492.093   1 
   1   1  -2 3654.53 247.369   2 
  -1  -1  -3 22978.8 545.610   3 
  -1  -1  -3 66400.1 904.555   1 
   1   1  -3 63480.6 900.161   2 
   1   1   3 64566.1 915.262   3 
   1  -1   3 18379.5 543.857   1 
  -1   1  -3 64065.2 920.840   1 
  -1  -1   3 64291.2 902.904   2 
  -1   1  -4 522300. 2749.44   1 
   1   1  -4 533715. 2696.88   2 
  -1  -1  -4 273219. 1959.94   3 
   1   1   4 526964. 2760.52   3 
   1  -1   4 234088. 1865.87   1 
  -1  -1   4 526458. 2623.30   2 
  -1  -1  -4 538514. 2625.94   1 
   1  -1  -4 358111. 2281.26   3 
  -1  -1  -5 45789.3 795.130   1 
   1  -1   5 37090.2 802.059   1 
   1  -1   5 42945.7 639.202   3 
   1   1  -5 44096.4 799.508   2 
  -1  -1   5 46182.1 796.089   2 
  -1   1  -5 43940.7 916.357   1 
  -1  -1  -5 35655.5 758.349   3 
  -1   1   5 43686.4 849.609   3 
   1   1   5 45461.8 868.393   3 
   1  -1  -5 41715.1 836.186   3 
   1  -1   6 3597.26 221.269   3 
   1   1  -6 4026.34 280.448   2 
  -1   1   6 4204.29 305.429   3 
   1  -1  -6 3797.04 302.111   3 
   1   1   6 4313.08 316.394   3 
   1   1   6 3473.40 245.856   1 
   1  -1   6 4511.10 310.081   1 
  -1   1  -6 3754.39 312.095   1 
  -1  -1  -6 3883.15 262.847   1 
  -1  -1   6 3924.50 279.161   2 
  -1  -1  -6 3649.20 291.034   3 
  -1   1   7 352.326 197.761   3 
   1   1   7 341.395 123.037   1 
  -1  -1   7 345.344 152.143   2 
  -1   1  -7 322.772 164.647   1 
   1  -1   7 482.256 136.834   3 
  -1  -1  -7 417.243 148.088   1 
   1  -1   7 513.240 170.560   1 
   1  -1  -7 488.922 187.476   3 
   1   1  -7 369.406 155.576   2 
  -1  -1  -7 475.016 195.869   3 
   1   1   7 628.418 203.287   3 
  -1   1  -7 363.492 118.702   3 
  -1  -1  -8 1089.69 190.952   1 
   1   1  -8 815.361 189.749   3 
  -1   1  -8 1177.81 179.417   3 
   1   1   8 1046.35 237.908   3 
   1   1   8 945.984 155.358   1 
   1  -1   8 1309.56 174.766   3 
   1  -1  -8 964.253 242.434   3 
  -1   1  -8 1492.69 243.310   1 
  -1   1   8 1502.22 243.937   3 
   1   1  -8 932.259 181.210   2 
  -1  -1  -8 1088.62 241.605   3 
   1  -1   8 1315.71 208.468   1 
  -1  -1   8 1392.21 216.074   2 
  -1   1   9 7184.63 443.372   3 
  -1   1  -9 7151.07 442.837   1 
  -1   1  -9 7009.49 350.785   3 
  -1  -1   9 7575.35 400.415   2 
   1   1   9 6995.04 445.319   3 
   1  -1   9 7239.46 359.987   3 
   1   1  -9 6846.07 377.209   3 
   1  -1   9 7996.72 436.671   1 
   1   1   9 7013.96 365.639   1 
  -1  -1  -9 7121.70 380.706   1 
  -1  -1  -9 6708.69 449.492   3 
   1  -1  -9 7360.38 465.373   3 
   1   1  -9 7056.10 383.051   2 
   1   1 -10 34090.7 817.000   2 
   1   1  10 34910.2 815.768   1 
  -1  -1  10 34172.1 834.058   2 
   1   1  10 34582.5 952.747   3 
   1   1 -10 34720.5 828.764   3 
  -1  -1 -10 33571.6 808.082   1 
   1  -1  10 35902.1 792.747   3 
   1  -1 -10 34138.4 963.758   3 
  -1   1 -10 34223.1 925.919   1 
  -1   1 -10 33872.2 773.805   3 
  -1   1  10 34540.9 957.913   3 
   1  -1  10 39543.4 963.454   1 
  -1  -1 -10 38829.8 1062.62   3 
  -1   1 -11 115515. 1720.49   1 
   1   1  11 119967. 1532.23   1 
   1  -1  11 117587. 1493.89   3 
   1   1 -11 116373. 1581.05   3 
  -1  -1 -11 120599. 1758.49   3 
  -1  -1  11 112330. 1535.18   2 
  -1   1  11 115706. 891.501   2 
  -1  -1 -11 114931. 1516.74   1 
   1  -1 -11 117269. 1809.56   3 
   1   1  11 118384. 1774.09   3 
  -1   1 -11 113434. 1463.87   3 
  -1   1  11 119571. 1831.27   3 
   1  -1  11 119917. 1720.62   1 
   1   1 -11 115519. 1540.00   2 
   1  -1  12 4413.13 426.321   1 
  -1  -1 -12 4285.58 468.772   3 
  -1   1  12 5510.43 238.685   1 
   1  -1 -12 3500.32 380.545   3 
   1   1 -12 3487.21 339.052   3 
   1   1  12 3966.29 325.426   1 
  -1  -1  12 3970.83 400.502   2 
   1   1  12 3868.10 373.735   3 
   1  -1  12 3638.12 319.452   3 
  -1   1 -12 4168.58 456.342   1 
  -1   1  12 4640.64 459.303   3 
  -1  -1 -12 3630.40 300.386   1 
  -1   1 -12 4284.00 385.095   3 
   1   1 -12 3616.51 313.506   2 
  -1   1  12 3617.39 184.681   2 
   1   1  13 13012.0 669.534   3 
   1   1  13 14137.3 590.105   1 
  -1  -1  13 12978.3 616.407   2 
  -1   1 -13 15564.5 665.346   3 
   1  -1 -13 12864.2 691.501   3 
  -1  -1 -13 13658.0 566.080   1 
  -1   1  13 14706.5 726.783   3 
  -1   1 -13 13495.7 665.612   1 
   1  -1  13 14387.9 658.287   1 
  -1   1  13 12144.8 351.453   2 
   1   1 -13 12403.4 555.560   2 
  -1   1  13 14549.6 360.514   1 
   1   1 -13 12496.6 591.107   3 
   1  -1  13 12895.5 571.263   3 
  -1  -1  14 66539.4 1321.72   3 
  -1   1 -14 65667.7 1392.25   1 
   1   1 -14 63843.6 1312.93   3 
   1   1  14 65642.4 1253.96   1 
  -1  -1  14 64050.7 1234.67   2 
  -1  -1 -14 64044.1 1222.18   1 
   1  -1  14 65900.2 1283.25   3 
   1  -1  14 66504.1 1391.50   1 
   1   1  14 66267.1 1477.81   3 
  -1   1  14 66330.6 803.715   1 
  -1  -1 -14 62816.3 1438.70   3 
   1  -1 -14 62753.4 1474.65   3 
  -1   1 -14 63911.7 1252.60   3 
   1   1 -14 63624.5 1231.20   2 
  -1   1  14 61747.4 811.899   2 
  -1   1  14 67376.0 1518.09   3 
   1   1  15 4703.52 429.471   1 
   1  -1  15 4782.53 456.253   1 
  -1   1 -15 4877.34 505.802   1 
  -1   1  15 4554.18 295.189   2 
  -1  -1  15 4590.21 457.699   3 
   1   1 -15 3802.64 370.318   3 
  -1   1  15 5872.31 296.065   1 
  -1  -1  15 7240.36 600.446   2 
  -1  -1 -15 3802.05 324.419   1 
  -1   1 -15 8532.05 645.491   3 
   1  -1 -15 3543.93 517.655   3 
   1  -1  15 3813.24 385.051   3 
  -1   1  15 5190.13 558.451   3 
  -1  -1  15 3570.12 298.899   1 
   1   1 -15 3806.26 313.104   2 
   1   1  15 4151.34 452.628   3 
   1  -1 -16 50108.0 1429.86   3 
  -1   1  16 53806.3 815.860   1 
  -1   1  16 51873.9 827.936   2 
   1   1  16 53161.9 1408.28   3 
  -1  -1  16 50690.5 1148.19   1 
   1   1 -16 52130.1 1270.34   3 
  -1   1 -16 52510.6 1319.92   1 
  -1  -1  16 52329.4 1274.32   3 
  -1   1  16 55430.2 1447.05   3 
   1  -1  16 54022.2 1256.32   3 
  -1  -1  16 55396.5 1224.15   2 
  -1  -1 -16 55935.7 1451.64   3 
  -1  -1 -16 50961.3 1143.85   1 
   1  -1  16 53535.8 1316.05   1 
   1   1  16 52658.6 1196.21   1 
  -1   1 -16 54759.5 1257.01   3 
   1   1 -17 47202.6 1284.35   3 
  -1  -1 -17 48281.7 1146.61   1 
  -1   1  17 50822.1 834.031   1 
  -1   1 -17 51025.5 1262.43   3 
   1   1  17 50886.4 1188.03   1 
   1   1  17 50479.1 1436.01   3 
  -1   1  17 47987.8 850.178   2 
   1  -1 -17 48605.1 1407.51   3 
  -1  -1 -17 52605.5 1434.24   3 
  -1   1 -17 48533.0 1294.58   1 
  -1  -1  17 48573.8 1150.97   1 
  -1  -1  17 51290.4 1206.74   2 
  -1   1  17 50489.4 1439.71   3 
  -1  -1  17 50556.7 1293.72   3 
   1  -1  17 49595.8 1248.73   3 
   1  -1  17 49192.3 1306.87   1 
   1   1  18 2903.93 343.548   1 
  -1  -1 -18 5099.00 603.178   3 
  -1   1  18 2964.81 284.458   2 
   1  -1  18 1976.85 331.947   3 
  -1   1  18 3128.69 251.405   1 
  -1  -1  18 3747.05 466.338   2 
  -1  -1 -18 2248.97 278.551   1 
   1  -1 -18 3204.72 476.113   3 
   1   1 -18 2579.30 376.995   3 
  -1  -1  18 2064.01 282.360   1 
  -1   1  18 3544.67 483.098   3 
  -1   1 -18 2993.98 401.283   1 
  -1  -1  18 2455.22 398.125   3 
  -1   1 -18 3440.70 470.588   3 
   1  -1  18 3102.18 380.218   1 
   1   1  18 2170.83 332.454   3 
   1   1  19 2746.08 303.754   1 
  -1   1 -19 2696.25 336.661   1 
   1  -1  19 3412.41 360.552   3 
  -1   1  19 3341.29 411.646   3 
   1   1  19 2619.54 353.923   3 
  -1  -1 -19 2899.52 397.256   3 
  -1   1  19 3307.38 238.121   1 
  -1  -1  19 3112.04 336.756   2 
   1   1 -19 2873.93 380.805   3 
  -1   1 -19 3292.47 372.186   3 
   1  -1  19 3066.68 365.705   1 
  -1   1  19 3200.25 240.646   2 
  -1  -1  19 3046.07 320.340   1 
  -1  -1  19 3492.79 388.378   3 
   1  -1 -19 3052.11 405.621   3 
  -1  -1 -19 2882.40 311.443   1 
   1   1 -20 339.835 226.053   3 
  -1  -1  20 957.394 273.345   2 
   1  -1 -20 261.234 286.359   3 
   1   1  20-320.228 218.946   3 
  -1  -1 -20 608.090 331.600   3 
   1  -1  20 291.648 203.035   1 
   1  -1  20 277.940 225.558   2 
  -1   1  20 276.225 144.359   2 
  -1   1  20 335.202 222.543   3 
   1  -1  20-96.1303 138.792   3 
  -1  -1  20 459.544 210.332   3 
  -1   1 -20 862.513 319.984   3 
  -1  -1 -20-248.963 150.077   1 
   1   1  20 114.392 150.625   1 
  -1   1  20 190.834 112.527   1 
  -1   1 -20 368.851 245.434   1 
  -1  -1  20 58.6959 106.517   1 
   1  -1  21 11285.5 683.536   1 
  -1   1  21 11290.9 476.272   1 
  -1   1  21 11282.9 483.219   2 
   1   1  21 11139.6 617.430   1 
  -1  -1 -21 11306.8 616.186   1 
  -1   1 -21 11664.9 704.906   1 
  -1  -1  21 10850.6 596.114   1 
  -1  -1  21 10982.5 696.393   3 
  -1   1 -21 12939.1 734.270   3 
   1   1  21 11918.7 774.028   3 
  -1  -1  21 12319.5 649.582   2 
   1   1 -21 11175.2 731.971   3 
   1  -1  21 11235.0 694.981   2 
   1  -1 -21 11685.2 787.959   3 
   1  -1  21 10989.8 685.105   3 
  -1  -1 -21 12983.5 805.598   3 
   1  -1 -22 17615.3 980.118   3 
   1   1  22 18918.4 813.136   1 
   1   1 -22 18384.9 911.159   3 
  -1   1  22 19308.9 627.709   2 
  -1   1  22 18930.7 622.282   1 
  -1   1 -22 19495.3 889.928   3 
   1  -1  22 18529.7 886.545   3 
  -1  -1  22 18419.2 801.138   2 
  -1   1 -22 18520.6 885.062   1 
  -1  -1  22 18071.8 784.248   1 
   1  -1  22 18795.2 891.985   1 
   1  -1  22 17986.9 860.870   2 
  -1  -1 -22 18290.6 972.944   3 
  -1  -1 -22 17115.7 772.403   1 
  -1  -1  22 18307.5 911.009   3 
  -1  -1  23 1869.32 336.687   2 
  -1   1  23 1493.99 238.765   2 
   1  -1  23 1175.95 270.803   3 
  -1  -1 -23 1985.33 431.926   3 
   1  -1  23 1146.80 291.519   2 
  -1  -1  23 1141.22 227.133   1 
   1  -1 -23 1063.90 363.265   3 
  -1  -1  23 982.231 305.824   3 
  -1   1 -23 1676.38 355.299   3 
   1   1 -23 1483.91 353.789   3 
   1   1  23 1204.46 270.327   1 
  -1   1  23 1536.15 218.934   1 
  -1  -1 -23 871.058 218.909   1 
   1  -1  23 1279.04 288.575   1 
   1  -1  24 2972.55 398.224   3 
   1  -1  24 2965.23 394.164   1 
  -1  -1  24 3319.78 370.726   2 
   1  -1 -24 3167.66 467.254   3 
  -1   1  24 3328.75 281.842   1 
  -1  -1 -24 3277.39 476.022   3 
  -1  -1 -24 3135.48 356.817   1 
  -1   1  24 3482.62 297.194   2 
   1   1  24 3247.75 369.689   1 
   1   1 -24 3118.60 462.765   3 
   1  -1  24 3243.53 403.045   2 
  -1  -1  24 3215.06 424.662   3 
  -1   1 -24 3582.66 426.408   3 
  -1  -1  24 2433.84 303.348   1 
   1   1 -25 4873.05 542.617   3 
   1  -1 -25 4043.47 536.012   3 
  -1  -1 -25 4217.57 432.074   1 
   1  -1  25 4471.98 475.777   2 
  -1  -1 -25 4364.74 522.973   3 
  -1  -1  25 4654.14 445.573   2 
  -1   1  25 4780.78 360.223   2 
   1   1  25 5047.30 461.934   1 
   1  -1  25 4361.30 461.447   1 
  -1  -1  25 4633.05 432.782   1 
  -1   1 -25 5338.15 536.410   3 
  -1   1  25 4706.24 342.758   1 
   1  -1 -26 5070.75 628.611   3 
  -1   1  26 4989.14 364.383   1 
   1  -1  26 4779.53 524.191   2 
   1   1  26 5535.29 497.249   1 
   1   1 -26 5667.97 644.927   3 
   1  -1  26 5487.19 543.479   1 
  -1  -1 -26 6055.65 690.583   3 
  -1   1  26 5492.06 400.437   2 
  -1  -1  26 6558.32 546.393   2 
  -1  -1 -26 5467.24 503.550   1 
  -1   1 -26 6980.31 665.509   3 
  -1  -1  26 5015.13 480.871   1 
   1   1  27 17050.8 823.121   2 
   1  -1  27 17888.8 973.736   1 
  -1  -1 -27 18951.6 904.048   1 
   1   1 -27 21300.8 1103.99   3 
   1  -1 -27 19860.2 1154.24   3 
   1   1  27 19415.8 917.733   1 
  -1  -1  27 17598.2 856.871   1 
   1  -1  27 18977.1 1033.96   2 
  -1   1  27 19588.0 730.833   1 
  -1   1 -27 22018.7 1125.46   3 
  -1  -1 -27 23186.8 1244.60   3 
  -1  -1  27 19964.2 940.857   2 
  -1   1  27 19175.8 731.073   2 
  -1   1 -28 51633.6 1685.28   3 
   1   1  28 52300.9 1510.51   1 
   1   1 -28 52073.2 1710.88   3 
  -1  -1 -28 50901.1 1825.69   3 
  -1  -1  28 48708.5 1441.94   1 
  -1   1  28 51840.8 1192.18   1 
   1  -1 -28 51382.6 1848.32   3 
   1   1  28 50380.5 1436.46   2 
  -1  -1  28 51014.6 1497.31   2 
  -1   1  28 51367.2 1199.41   2 
  -1  -1 -28 51942.9 1500.81   1 
   1  -1  28 51189.1 1644.12   2 
  -1   1  29 2143.73 342.500   2 
   1   1 -29 3579.91 573.361   3 
  -1   1 -29 4094.54 598.609   3 
   1  -1  29 3003.04 476.673   2 
  -1   1  29 2082.76 298.090   1 
  -1  -1 -29 3691.38 649.089   3 
  -1  -1  29 1228.79 336.831   1 
   1   1  29 2027.06 372.324   1 
  -1  -1  29 2365.52 458.918   2 
   1   1  29 1732.18 409.362   2 
  -1  -1 -29 2040.61 430.713   1 
   1  -1 -29 3691.59 700.807   3 
  -1   1 -30 4630.77 568.676   3 
   1   1  30 4604.16 480.114   1 
  -1   1  30 4448.35 390.052   2 
   1   1  30 4028.55 434.910   2 
  -1   1  30 4184.14 363.820   1 
  -1  -1  30 4775.89 495.364   2 
  -1  -1  30 4410.20 459.680   1 
   1  -1  30 4302.33 510.373   2 
   1   1 -30 5228.84 602.764   3 
  -1  -1 -30 4575.86 612.095   3 
   1  -1 -30 5383.33 666.680   3 
  -1  -1  31 1922.04 336.220   2 
  -1   1 -31 2324.95 446.587   3 
  -1   1  31 1825.72 262.750   2 
  -1   1  31 1783.20 246.918   1 
   1  -1 -31 2505.86 501.332   3 
   1   1  31 1633.30 289.694   1 
  -1  -1  31 1277.64 266.919   1 
   1   1 -31 2113.31 420.112   3 
   1  -1  31 2232.33 407.642   2 
  -1  -1 -31 2185.17 461.514   3 
   1   1  31 2094.76 331.601   2 
   1   1  32 198.672 150.440   1 
   1   1 -32-202.073 217.617   3 
   1  -1  32 11.2901 186.800   2 
  -1  -1  32 32.4593 134.702   1 
  -1   1 -32-205.449 253.790   3 
   1   1  32-23.4072 168.168   2 
  -1  -1  32-118.259 184.711   2 
   1  -1 -32 356.709 343.713   3 
  -1   1  32-38.0810 124.102   2 
   1  -1 -33 1176.31 407.878   3 
  -1  -1  33 709.822 185.464   2 
   1  -1  33 875.712 237.953   2 
   1   1 -33 498.896 293.793   3 
   1   1  33 525.952 194.447   2 
  -1   1  33 990.642 205.494   2 
  -1  -1 -33 645.606 264.039   3 
  -1   1 -33 879.828 325.998   3 
   1   1  34 255.284 200.974   2 
  -1   1 -34-61.3567 285.482   3 
   1  -1  34 134.322 196.320   2 
   1   1 -34 376.587 288.890   3 
   1  -1 -34 471.000 360.438   3 
  -1  -1  34 260.051 186.363   2 
  -1  -1 -34 423.514 261.098   3 
   1   1 -35 245.334 280.998   3 
   1  -1  35-168.844 201.304   2 
   1   1  35 165.273 219.746   2 
   1  -1 -35 393.335 294.461   3 
  -1   1 -35 489.556 343.954   3 
  -1  -1  35 296.187 194.850   2 
  -1  -1 -35 396.068 259.672   3 
  -1  -1 -36 2119.50 509.408   3 
   1   1 -36 2050.32 465.061   3 
   1  -1  36 1878.50 364.216   2 
  -1  -1  36 2239.52 374.296   2 
  -1   1 -36 2206.68 483.602   3 
   1  -1 -36 2447.02 511.905   3 
   1   1 -37-50.1124 239.019   3 
  -1  -1 -37 256.590 325.590   3 
  -1   1 -37 280.724 276.060   3 
   1  -1 -37 654.857 336.534   3 
   1  -1  37 704.431 275.494   2 
  -1  -1 -38 659.190 370.743   3 
   1  -1  38 202.917 191.758   2 
  -1   1 -38 321.365 298.106   3 
   1  -1 -38-10.4524 283.851   3 
   1   1 -38 197.088 260.044   3 
   1  -1 -39 399.342 317.259   3 
  -1   1 -39 1219.83 376.383   3 
  -1  -1 -39 537.381 317.236   3 
   1   1 -39 586.606 284.577   3 
   1  -1 -40 381.281 335.475   3 
   1   1 -40 131.712 291.147   3 
  -1  -1 -40 884.573 350.903   3 
  -1  -1 -41-417.145 361.816   3 
   1   1 -41-445.703 338.138   3 
  -1   1 -41 293.544 309.154   3 
   1  -1 -41-178.310 375.799   3 
   1   1 -42 2336.98 537.875   3 
  -1  -1 -42 1617.35 485.191   3 
  -1   1 -42 1605.40 450.303   3 
   1  -1 -42 1564.93 490.775   3 
  -1  -1 -43 624.604 369.779   3 
   1   1 -43 745.257 402.928   3 
  -1   1 -43 528.530 326.425   3 
   1  -1 -43 1017.28 486.802   3 
   1  -1 -44 2815.09 603.368   3 
   1   1 -44 2399.83 544.048   3 
  -1  -1 -44 2685.76 569.489   3 
  -1   1 -44 1903.64 522.596   3 
   1  -1 -45 77.0997 334.567   3 
  -1  -1 -45 888.945 436.216   3 
   1   1 -45 606.925 381.546   3 
  -1  -1 -46 1343.46 544.393   3 
   1   2   0 176.881 114.210   3 
   1   2   0 7.73537 130.668   2 
   1  -2   0 233.556 118.338   1 
   1  -2  -1 1068.04 177.528   1 
   1   2   1 625.107 153.575   2 
   1   2   1 960.389 167.082   3 
  -1  -2   1 1019.25 209.537   2 
   1  -2   1 1090.13 164.794   1 
  -1  -2  -1 726.704 197.913   2 
   1   2  -1 808.848 165.246   2 
   1  -2  -1 710.000 141.488   3 
  -1  -2  -2 38147.1 786.969   2 
   1  -2  -2 38184.3 679.301   1 
  -1  -2  -2 36465.9 752.727   3 
  -1  -2   2 37890.3 834.493   2 
   1   2  -2 37940.2 840.853   2 
   1   2   2 38418.6 758.481   3 
  -1   2  -2 38603.4 813.791   1 
   1  -2  -2 36528.0 732.380   3 
   1  -2   2 39428.4 827.554   1 
  -1   2   3 132903. 1437.57   3 
   1   2   3 113747. 1346.03   2 
   1   2   3 127675. 1462.78   3 
   1  -2  -3 128645. 1428.94   3 
  -1  -2   3 134517. 1562.13   2 
  -1  -2  -3 130128. 1445.81   3 
  -1  -2  -3 133100. 1438.67   2 
   1  -2  -3 131802. 1089.67   2 
  -1   2  -3 135662. 1557.14   1 
   1   2  -3 132434. 1578.38   2 
   1  -2  -3 129453. 1136.18   1 
   1  -2   3 130782. 1567.19   1 
  -1   2  -4 48786.2 1020.74   1 
   1  -2   4 45156.5 966.370   1 
   1  -2  -4 42884.6 883.105   3 
  -1  -2   4 42548.2 927.194   2 
  -1  -2  -4 43151.9 891.310   3 
   1  -2  -4 45925.0 643.412   1 
   1   2   4 43151.5 898.312   3 
   1   2   4 43602.5 848.737   2 
  -1  -2  -4 44018.3 827.286   2 
   1  -2  -4 42543.6 586.527   2 
   1   2  -4 42946.1 928.251   2 
  -1   2   4 42778.2 873.482   3 
   1   2   5 81597.9 1294.66   3 
   1  -2  -5 87655.4 780.414   1 
   1  -2   5 84231.3 1343.51   1 
   1   2  -5 85907.8 1323.09   2 
  -1   2  -5 88543.2 1351.35   1 
  -1   2   5 81402.2 1275.39   3 
  -1  -2   5 85676.1 1323.88   2 
  -1  -2  -5 85288.4 1206.32   1 
   1   2   5 83863.1 1158.74   2 
  -1  -2  -5 80451.7 1257.92   3 
   1  -2  -5 83208.2 1287.94   3 
   1  -2  -5 85733.1 739.217   2 
  -1  -2  -6 35571.1 869.051   3 
  -1   2   6 35865.1 890.080   3 
  -1  -2  -6 36148.9 804.516   1 
   1  -2   6 36893.3 926.448   1 
   1  -2   6 34506.2 506.572   3 
   1   2   6 34842.5 893.557   3 
   1   2  -6 35513.2 891.558   2 
  -1  -2   6 34877.1 881.247   2 
   1   2   6 35304.7 757.167   2 
  -1   2  -6 39124.2 987.220   1 
   1  -2  -6 36511.8 896.964   3 
  -1  -2   7 65860.3 1225.51   2 
   1   2  -7 66665.3 1237.89   2 
   1  -2   7 68192.9 758.020   3 
   1   2   7 66289.5 1033.50   2 
  -1  -2  -7 66908.7 1230.80   3 
   1   2   7 66209.1 1253.76   3 
   1  -2  -7 64982.2 1255.27   3 
  -1  -2  -7 67837.6 1099.77   1 
  -1   2   7 68364.8 1263.74   3 
   1  -2   7 66316.5 1259.41   1 
  -1   2  -7 68155.6 1306.64   1 
   1  -2  -8 55307.5 1197.80   3 
   1  -2   8 55574.9 1187.73   1 
  -1  -2   8 55047.6 1152.87   2 
   1   2  -8 55057.8 1156.47   2 
   1  -2   8 53851.6 756.395   3 
  -1   2  -8 59324.9 1236.69   1 
  -1  -2  -8 55815.6 1010.10   1 
  -1  -2  -8 52940.8 1164.92   3 
  -1   2   8 55584.8 1196.29   3 
   1   2   8 55181.0 1194.85   3 
  -1   2   9 438.635 235.152   3 
  -1  -2  -9 512.800 241.967   3 
   1   2   9 17.3212 181.020   3 
   1  -2   9 181.535 167.844   1 
  -1  -2   9 316.329 230.291   2 
  -1  -2  -9 363.190 153.753   1 
   1   2  -9 397.528 151.203   3 
   1  -2  -9 92.3439 232.592   3 
   1   2  -9 335.805 204.001   2 
   1  -2   9 190.618 116.419   3 
  -1   2  -9 330.223 112.738   3 
   1   2   9 325.328 143.965   1 
   1   2  10 1562.54 255.749   3 
   1  -2 -10 1900.53 391.692   3 
  -1   2  10 1580.41 343.355   3 
   1  -2  10 1532.71 273.011   1 
   1   2 -10 1553.40 212.838   3 
  -1  -2 -10 1775.05 244.871   1 
   1   2 -10 1924.09 282.583   2 
   1   2  10 1363.89 191.321   1 
   1  -2  10 1786.60 200.524   3 
  -1  -2  10 1455.43 275.785   2 
  -1  -2 -10 1871.21 399.374   3 
  -1   2 -10 1591.20 177.960   3 
  -1   2 -10 2670.76 396.207   1 
  -1  -2 -11 33734.7 844.279   1 
   1  -2 -11 32842.0 1044.00   3 
   1  -2  11 34124.6 710.508   3 
   1   2  11 34097.5 848.877   1 
   1  -2  11 34033.8 1009.61   1 
   1   2 -11 34257.4 794.367   3 
   1   2  11 34239.9 1044.76   3 
  -1   2 -11 34130.3 708.121   3 
  -1  -2 -11 33314.5 1020.73   3 
  -1   2 -11 33831.6 1020.25   1 
  -1  -2  11 33484.6 967.540   2 
  -1   2  11 36706.7 1072.38   3 
   1   2 -11 33103.8 944.989   2 
  -1  -2  12 6253.78 537.601   2 
   1  -2  12 5814.12 326.361   3 
   1   2 -12 5776.20 371.872   3 
  -1   2  12 6033.02 510.442   3 
   1  -2 -12 5854.87 571.823   3 
  -1   2 -12 7187.78 557.101   1 
   1   2  12 5818.69 376.506   1 
  -1  -2 -12 9142.72 716.499   3 
   1   2 -12 6228.49 430.969   2 
  -1  -2 -12 5713.58 369.082   1 
   1  -2  12 6156.01 465.550   1 
  -1   2 -12 6224.06 339.703   3 
   1   2  12 5574.31 461.186   3 
   1   2  13 14688.1 750.203   3 
   1   2  13 15219.6 595.112   1 
   1  -2  13 18132.3 784.092   2 
   1  -2 -13 14315.3 758.846   3 
  -1   2 -13 16571.5 776.744   1 
  -1  -2  13 17793.7 775.228   2 
   1   2 -13 15127.8 586.883   3 
   1  -2  13 15060.6 543.522   3 
   1   2 -13 15062.0 681.504   2 
  -1   2  13 15494.0 765.942   3 
  -1  -2 -13 18284.7 819.210   3 
   1  -2  13 15625.4 734.128   1 
  -1   2 -13 15371.0 539.387   3 
  -1  -2 -13 15374.2 593.772   1 
  -1   2 -14 30429.3 1027.05   1 
  -1  -2 -14 28827.6 814.701   1 
   1  -2 -14 27891.2 1051.04   3 
   1  -2  14 30819.0 1010.38   2 
  -1  -2  14 30375.0 970.156   2 
   1   2 -14 27778.4 822.377   3 
   1   2 -14 29458.9 976.432   2 
  -1  -2 -14 32030.1 1086.01   3 
   1   2  14 28670.2 1048.85   3 
   1   2  14 28820.7 828.219   1 
   1  -2  14 29070.2 1007.95   1 
  -1   2 -14 30009.5 771.107   3 
  -1   2  14 29530.3 1069.22   3 
   1  -2  14 29135.6 782.428   3 
   1   2 -15 4996.72 376.847   3 
   1   2 -15 4454.03 403.840   2 
   1  -2  15 4614.42 347.569   3 
  -1  -2 -15 6834.72 615.660   3 
  -1  -2 -15 4373.50 345.986   1 
   1   2  15 4709.20 373.845   1 
  -1  -2  15 6487.07 524.031   2 
   1  -2 -15 5329.81 517.156   3 
  -1   2 -15 4758.75 337.737   3 
   1  -2  15 5620.19 492.275   2 
  -1   2  15 5459.16 522.165   3 
   1   2  15 4974.93 481.676   3 
   1  -2  15 5211.06 466.763   1 
   1  -2  16 129.441 176.298   2 
   1  -2 -16-248.660 247.725   3 
   1   2  16 106.048 189.443   3 
   1   2 -16-92.1690 172.999   3 
  -1  -2  16 455.307 237.281   2 
  -1  -2 -16 44.5414 136.939   1 
   1   2 -16 206.618 147.220   2 
   1  -2  16 310.740 204.499   1 
  -1   2  16 304.706 201.377   3 
  -1  -2 -16 419.449 276.653   3 
   1   2  16 99.7953 124.090   1 
  -1   2 -16-8.82214 132.748   3 
   1  -2  16 212.864 125.789   3 
   1   2  17 74.8952 112.347   1 
   1  -2  17 341.942 213.873   2 
  -1  -2  17 314.478 188.560   2 
  -1  -2 -17 238.241 236.645   3 
  -1  -2  17 57.6177 142.824   1 
   1  -2 -17 68.5731 246.287   3 
   1  -2  17 172.770 138.163   1 
  -1   2 -17 253.816 139.107   3 
  -1  -2 -17 233.537 137.590   1 
  -1   2  17 126.275 47.9764   2 
   1  -2  17 161.102 123.075   3 
  -1   2  17 145.842 54.0798   1 
   1   2  17 175.502 202.888   3 
  -1   2  17 59.4707 181.529   3 
   1   2 -17-52.4552 173.514   3 
   1   2 -17 114.676 137.345   2 
  -1   2  18 416.237 77.8027   1 
   1  -2  18 486.660 174.881   1 
  -1   2  18 333.812 211.775   3 
  -1  -2 -18 143.662 117.153   1 
   1   2  18 487.390 225.103   3 
   1  -2  18 465.636 171.805   3 
  -1  -2 -18 418.653 247.652   3 
  -1  -2  18 663.572 188.582   1 
  -1   2 -18 378.152 184.263   3 
   1   2  18 646.062 180.152   1 
   1   2 -18 506.961 206.725   3 
  -1   2  18 452.489 82.3472   2 
  -1  -2  18 912.473 257.727   2 
   1  -2  18 1111.40 291.085   2 
   1  -2 -18 281.867 262.601   3 
   1   2 -18 236.911 142.135   2 
   1   2  19 2681.73 418.701   3 
  -1  -2  19 2697.19 337.001   1 
   1   2 -19 3012.61 353.589   3 
   1  -2  19 3778.23 492.988   2 
   1  -2 -19 3270.44 586.926   3 
  -1  -2 -19 5043.98 590.384   3 
   1   2  19 3280.82 356.924   1 
   1  -2  19 3028.91 335.704   3 
  -1  -2 -19 2911.25 304.029   1 
  -1   2  19 3331.05 193.436   2 
   1  -2  19 2754.80 377.295   1 
  -1   2  19 2674.65 184.479   1 
  -1   2  19 3090.25 440.376   3 
  -1   2 -19 4615.43 430.195   3 
  -1  -2  19 4815.47 502.076   2 
  -1   2  20 25777.5 518.034   2 
  -1  -2 -20 26501.4 882.057   1 
  -1   2 -20 27171.6 937.846   3 
  -1  -2  20 27114.6 1025.91   1 
   1  -2  20 27312.9 1098.25   1 
   1  -2  20 27137.1 963.097   3 
  -1  -2  20 27914.9 1033.88   2 
   1   2 -20 26525.4 977.960   3 
   1  -2 -20 26515.9 1174.24   3 
   1  -2  20 25791.2 1067.61   2 
   1   2  20 27685.7 929.037   1 
  -1  -2 -20 27544.3 1163.14   3 
  -1   2  20 25722.5 565.063   1 
  -1   2 -21 10797.9 710.580   3 
  -1   2  21 7417.00 319.912   2 
   1  -2 -21 7266.49 801.935   3 
  -1  -2  21 5988.88 508.704   1 
   1  -2  21 7295.46 671.236   2 
  -1  -2  21 10432.5 733.703   2 
   1  -2  21 6822.59 539.021   3 
   1   2 -21 6164.58 598.891   3 
  -1  -2 -21 5704.46 448.870   1 
   1  -2  21 6617.88 595.759   1 
  -1  -2 -21 12446.8 923.035   3 
  -1   2  21 5600.85 294.329   1 
   1   2  21 6530.92 529.224   1 
  -1   2  22 46364.3 767.884   2 
  -1  -2  22 48695.0 1417.16   2 
   1  -2  22 47712.5 1503.80   1 
  -1   2 -22 47579.9 1325.57   3 
   1  -2  22 48729.9 1360.08   3 
   1  -2  22 48176.1 1497.41   2 
  -1  -2 -22 48599.9 1249.92   1 
   1  -2 -22 46440.3 1612.15   3 
  -1  -2  22 47013.7 1406.51   1 
   1   2  22 48375.9 1287.53   1 
  -1  -2 -22 48999.2 1602.94   3 
   1   2 -22 46939.4 1370.46   3 
  -1   2  22 47069.7 835.921   1 
  -1  -2  23 2011.33 313.060   1 
  -1   2  23 2767.34 231.890   2 
   1  -2  23 3178.75 421.735   3 
  -1  -2 -23 5392.73 656.869   3 
  -1   2 -23 4309.29 515.337   3 
  -1  -2 -23 2030.98 301.816   1 
   1  -2  23 3094.59 422.679   1 
  -1  -2  23 4905.90 539.925   2 
   1   2  23 2784.75 379.093   1 
   1  -2  23 4489.21 571.692   2 
  -1   2  23 2209.65 214.704   1 
   1  -2 -23 3112.43 503.316   3 
   1   2 -23 3162.43 491.642   3 
   1  -2 -24 871.330 345.243   3 
   1  -2  24 385.464 175.116   3 
  -1   2  24 602.305 128.875   2 
  -1   2  24 568.603 120.810   1 
  -1  -2 -24 1530.49 427.951   3 
   1   2 -24 685.798 288.871   3 
  -1  -2 -24 528.931 185.626   1 
  -1  -2  24 1098.14 297.367   2 
  -1  -2  24 551.190 216.695   1 
  -1   2 -24 909.810 274.791   3 
   1  -2  24 1226.08 330.381   2 
   1  -2  24 444.381 237.392   1 
   1   2  24 661.120 206.891   1 
  -1  -2  25 6037.72 534.113   2 
  -1  -2 -25 6567.12 493.846   1 
   1   2  25 5770.91 476.093   1 
  -1   2  25 6592.54 324.688   2 
  -1  -2 -25 6837.33 665.120   3 
   1   2 -25 6311.47 562.540   3 
  -1  -2  25 5630.43 521.951   1 
   1  -2  25 5813.07 567.954   2 
   1  -2  25 6970.41 565.329   3 
   1  -2 -25 6663.00 687.155   3 
  -1   2 -25 7052.28 562.698   3 
  -1   2  25 6152.34 336.933   1 
   1   2  26 957.477 253.988   1 
  -1  -2 -26 639.026 188.535   1 
  -1  -2 -26 1155.32 401.211   3 
   1  -2  26 1104.34 295.037   3 
  -1   2 -26 1240.86 299.504   3 
  -1   2  26 1199.51 175.960   2 
  -1  -2  26 1113.25 266.936   1 
   1  -2  26 1185.66 330.365   2 
  -1  -2  26 1087.56 293.154   2 
  -1   2  26 856.399 147.528   1 
   1   2 -26 1270.57 306.828   3 
   1  -2 -26 1297.83 423.299   3 
   1  -2 -27 4733.35 628.937   3 
  -1   2  27 4198.83 284.049   2 
  -1  -2  27 3801.07 470.651   2 
  -1   2  27 3893.80 288.293   1 
   1   2  27 3779.57 394.714   1 
  -1   2 -27 3761.41 481.853   3 
  -1  -2  27 3527.41 429.465   1 
   1   2 -27 4173.22 512.488   3 
  -1  -2 -27 3894.37 397.168   1 
   1  -2  27 4058.05 516.047   2 
  -1  -2 -27 4499.79 601.757   3 
  -1   2 -28 3063.83 487.277   3 
  -1  -2 -28 1717.63 315.161   1 
   1  -2  28 1860.19 454.555   2 
   1   2 -28 2044.92 473.122   3 
  -1  -2  28 2486.57 436.258   2 
   1  -2 -28 3144.97 632.906   3 
  -1  -2 -28 3376.96 604.215   3 
  -1   2  28 1722.24 228.744   1 
   1   2  28 1848.90 329.848   1 
  -1  -2  28 1443.30 334.053   1 
  -1   2  28 1720.01 222.344   2 
  -1   2 -29 25012.1 1146.34   3 
  -1  -2  29 24303.2 1140.02   2 
  -1   2  29 23893.6 688.247   2 
  -1  -2 -29 23452.8 1313.31   3 
   1   2  29 23420.0 941.182   2 
   1  -2  29 23148.1 1184.04   2 
  -1  -2 -29 24711.4 1013.03   1 
   1   2 -29 24632.1 1171.13   3 
   1   2  29 23687.7 1004.26   1 
  -1   2  29 24781.9 732.684   1 
   1  -2 -29 25648.2 1367.48   3 
  -1   2  30 4243.85 318.684   2 
   1  -2  30 4524.84 596.911   2 
  -1   2 -30 4847.02 603.701   3 
   1  -2 -30 3935.03 632.172   3 
   1   2  30 4033.05 458.212   1 
  -1   2  30 3663.37 317.688   1 
   1   2 -30 5268.73 609.016   3 
  -1  -2 -30 4311.58 474.104   1 
  -1  -2  30 4938.68 560.494   2 
  -1  -2 -30 4992.74 736.075   3 
   1   2  30 3835.09 435.670   2 
  -1   2  31 10510.0 475.066   2 
  -1   2 -31 11000.2 786.561   3 
   1   2 -31 10658.1 800.182   3 
   1   2  31 9255.50 657.101   1 
   1  -2  31 10347.4 818.736   2 
  -1  -2 -31 10970.0 698.723   1 
  -1  -2  31 10212.2 778.339   2 
   1  -2 -31 10278.2 934.039   3 
   1   2  31 10128.3 655.702   2 
  -1  -2 -31 10127.0 883.694   3 
   1  -2  32 328.326 281.852   2 
   1   2  32 621.221 247.579   2 
   1  -2 -32 618.651 367.086   3 
  -1  -2  32 639.632 271.472   2 
   1   2 -32 860.568 328.683   3 
  -1  -2 -32 310.150 322.613   3 
  -1  -2 -32 202.000 176.920   1 
  -1   2 -32 418.062 259.869   3 
   1   2 -33 821.957 360.835   3 
  -1  -2  33 447.773 262.387   2 
   1  -2 -33 1302.19 517.907   3 
  -1   2 -33 516.421 318.349   3 
   1  -2  33 38.4566 267.331   2 
  -1  -2 -33 432.398 322.309   3 
   1   2  33 446.533 223.516   2 
   1  -2 -34 8908.77 892.190   3 
  -1   2 -34 8587.20 768.157   3 
  -1  -2 -34 8961.91 893.890   3 
  -1  -2  34 9137.07 753.214   2 
   1  -2  34 9011.51 813.580   2 
   1   2 -34 8072.34 749.962   3 
   1   2  34 8576.03 625.571   2 
  -1   2 -35 1460.58 389.470   3 
  -1  -2 -35 1411.89 445.022   3 
   1  -2 -35 1122.28 421.009   3 
  -1  -2  35 1629.84 400.975   2 
   1  -2  35 923.574 311.646   2 
   1   2 -35 1249.85 364.187   3 
  -1   2 -36 264.262 301.784   3 
   1  -2  36 153.268 216.090   2 
  -1  -2  36 330.200 263.421   2 
   1  -2 -36 568.138 417.729   3 
  -1  -2 -36 407.606 384.818   3 
   1   2 -36 213.692 248.856   3 
   1   2 -37 1227.32 343.131   3 
  -1  -2  37 1390.05 345.278   2 
  -1  -2 -37 2242.62 527.254   3 
   1  -2  37 1018.93 339.825   2 
  -1   2 -37 1809.57 430.701   3 
   1  -2 -37 1813.71 444.392   3 
   1  -2  38 68.2299 197.778   2 
   1   2 -38 304.718 259.278   3 
  -1  -2 -38 25.7599 295.989   3 
   1  -2 -38-507.791 367.678   3 
  -1   2 -38-222.206 229.977   3 
  -1   2 -39 612.544 339.642   3 
   1  -2 -39-362.355 347.952   3 
  -1  -2 -39 51.0224 267.774   3 
   1  -2  39-33.0282 217.607   2 
   1   2 -39 63.8205 255.294   3 
   1  -2 -40 809.528 400.471   3 
   1   2 -40 1085.02 372.720   3 
  -1   2 -40 660.932 323.961   3 
  -1  -2 -40 677.455 361.334   3 
   1   2 -41 855.692 370.892   3 
   1  -2 -41 558.496 430.881   3 
  -1  -2 -41 638.599 394.135   3 
  -1   2 -41 392.263 282.279   3 
  -1   2 -42 263.441 305.820   3 
  -1  -2 -42 30.8421 269.759   3 
   1   2 -42 817.485 363.578   3 
   1  -2 -42-26.1150 279.900   3 
   1   2 -43 275.751 331.146   3 
   1  -2 -43-579.768 331.631   3 
  -1  -2 -43-159.078 328.896   3 
  -1  -2 -44 621.140 443.924   3 
   1  -2 -44 484.598 396.653   3 
  -1  -3   0-85.1173 193.540   2 
   1   3   0-96.6291 170.107   2 
   1   3   0 196.180 141.204   3 
   1  -3   0 293.427 154.146   2 
  -1   3   1 91368.5 1183.37   3 
   1   3  -1 93136.2 1494.12   2 
   1  -3   1 88780.1 1017.85   3 
   1  -3  -1 92126.5 1195.90   3 
   1   3   1 91746.6 1441.75   2 
   1   3  -1 91496.6 1135.85   3 
   1   3   1 91821.8 1250.71   3 
   1  -3  -1 92608.8 1277.94   2 
  -1  -3  -1 91954.4 1232.37   3 
   1  -3   1 93888.2 1391.88   2 
  -1  -3   1 94533.4 1479.74   2 
  -1  -3  -1 95509.6 1447.26   2 
   1   3  -2 12852.6 421.205   3 
   1  -3   2 13091.2 605.996   2 
  -1  -3  -2 13054.9 510.589   3 
   1  -3  -2 13504.2 475.470   2 
   1  -3  -2 14126.2 518.833   3 
   1   3   2 13298.9 524.323   3 
   1   3  -2 13928.5 607.890   2 
  -1  -3   2 13388.8 602.465   2 
  -1   3   2 13655.4 489.952   3 
   1   3   2 13435.0 560.930   2 
   1  -3   2 13762.5 359.432   3 
   1  -3   2 13595.5 594.026   1 
  -1  -3  -2 15059.5 597.635   2 
   1   3   3 42860.0 962.185   2 
  -1  -3   3 44027.2 1059.30   2 
   1   3  -3 44282.7 1071.21   2 
  -1   3   3 44551.1 922.628   3 
   1  -3  -3 43974.9 824.022   2 
   1  -3   3 43067.9 1032.30   1 
   1  -3   3 46126.1 600.640   3 
  -1  -3  -3 44974.2 940.714   3 
   1   3   3 44091.6 958.307   3 
   1  -3   3 44955.6 1035.11   2 
  -1  -3  -3 44979.5 974.598   2 
   1  -3  -3 42546.5 928.288   3 
  -1  -3  -4 916.563 238.538   2 
  -1  -3  -4 797.425 248.842   3 
  -1  -3   4 333.329 220.455   2 
   1   3  -4 648.838 224.569   2 
   1  -3  -4 618.852 237.920   3 
   1   3   4 590.435 199.272   2 
   1  -3  -4 868.860 177.578   2 
   1   3   4 840.326 229.498   3 
  -1   3   4 913.254 220.497   3 
   1  -3   4 394.436 217.998   1 
   1   3   5 255937. 2470.63   3 
   1  -3  -5 253201. 2393.31   3 
   1   3   5 258699. 2301.58   2 
  -1  -3  -5 257911. 2498.27   3 
   1  -3   5 258528. 2628.29   1 
   1  -3   5 257118. 2587.25   2 
   1   3  -5 258912. 2643.41   2 
  -1  -3   5 253001. 2636.93   2 
   1  -3  -5 256207. 1780.47   2 
  -1   3   5 249393. 2410.78   3 
  -1  -3  -5 259998. 2287.57   2 
   1  -3  -6 16062.2 429.484   2 
  -1  -3  -6 15949.4 596.077   2 
   1  -3   6 16185.3 750.284   1 
   1  -3  -6 14963.7 714.153   3 
  -1  -3  -6 15772.0 670.091   3 
   1   3  -6 15501.8 691.249   2 
   1   3   6 15899.0 587.315   2 
  -1   3   6 15671.7 652.944   3 
   1   3   6 16619.1 673.238   3 
  -1  -3   6 14678.3 685.139   2 
   1   3  -7 22621.7 824.271   2 
   1  -3  -7 22953.0 475.752   2 
   1   3   7 23848.0 812.143   3 
  -1  -3   7 22404.3 849.903   2 
  -1   3   7 23532.0 817.520   3 
   1  -3   7 25411.2 913.662   2 
  -1  -3  -7 24166.9 696.789   2 
   1   3   7 22053.2 676.664   2 
  -1  -3  -7 24227.2 810.774   3 
   1  -3   7 22237.5 831.198   1 
   1  -3  -7 22121.2 818.856   3 
  -1   3   8 30886.5 971.520   3 
  -1  -3   8 28458.7 954.449   2 
  -1  -3  -8 29007.2 934.173   3 
   1   3   8 29552.8 774.094   2 
  -1  -3  -8 30236.3 822.960   1 
   1   3   8 29225.9 932.985   3 
   1   3  -8 29522.0 960.547   2 
   1  -3   8 30239.0 1003.41   2 
   1  -3  -8 29791.7 949.860   3 
   1  -3  -8 29862.9 500.170   2 
   1  -3   8 30029.1 990.019   1 
   1  -3   9 20733.2 879.275   2 
   1   3  -9 16013.3 736.055   2 
  -1  -3  -9 16978.5 781.690   3 
   1   3   9 16629.8 593.940   2 
   1  -3   9 15666.3 348.235   3 
  -1  -3  -9 16383.1 616.716   1 
   1  -3   9 17333.3 777.817   1 
  -1  -3   9 16192.7 781.253   2 
   1   3   9 16902.2 746.350   3 
   1  -3  -9 15286.7 312.925   2 
   1  -3  -9 16511.0 804.873   3 
  -1   3   9 16929.0 754.825   3 
  -1  -3 -10 40445.6 1154.98   3 
   1  -3  10 39902.6 607.529   3 
  -1   3  10 41334.5 1182.88   3 
   1  -3  10 40724.9 1199.34   1 
   1  -3  10 44780.4 1224.98   2 
   1   3  10 40759.8 1175.57   3 
  -1  -3  10 42029.5 1174.65   2 
   1  -3 -10 40390.4 1174.40   3 
   1   3 -10 41952.1 772.468   3 
  -1  -3 -10 43049.4 988.234   1 
   1   3 -10 40276.7 1160.07   2 
   1   3  10 41075.9 918.044   2 
  -1  -3 -11 7837.01 440.169   1 
   1   3  11 7850.27 557.345   3 
   1  -3  11 10654.0 688.770   2 
   1  -3  11 8168.88 299.771   3 
   1  -3 -11 7236.73 239.424   1 
   1   3  11 7270.21 402.966   2 
   1  -3 -11 8420.27 624.866   3 
   1   3 -11 8039.30 536.233   2 
  -1  -3 -11 9482.04 678.670   3 
  -1   3  11 9143.62 627.791   3 
   1   3 -11 8149.73 369.744   3 
   1  -3  11 8067.24 569.544   1 
  -1  -3  11 7762.87 565.901   2 
   1   3 -12 10445.8 610.694   2 
   1   3 -12 10521.7 440.104   3 
   1  -3 -12 11101.1 733.124   3 
   1  -3  12 12071.9 669.697   1 
  -1  -3  12 11995.2 704.132   2 
  -1  -3 -12 10608.6 512.961   1 
  -1  -3 -12 12743.0 752.397   3 
   1  -3  12 13062.1 709.027   2 
   1  -3  12 11529.6 380.160   3 
   1   3  12 10855.7 482.024   2 
  -1   3  12 11590.0 681.293   3 
   1   3  12 10644.5 648.842   3 
   1  -3  13 23797.2 970.253   2 
   1   3 -13 23345.7 924.958   2 
   1  -3  13 22662.9 585.116   3 
   1   3 -13 23566.0 662.570   3 
   1  -3 -13 22961.2 979.415   3 
  -1  -3  13 24849.6 964.262   2 
   1   3  13 24535.3 999.582   3 
   1  -3  13 24939.9 973.501   1 
  -1  -3 -13 25389.1 1003.62   3 
  -1   3 -13 22508.7 571.298   3 
  -1   3  13 25379.8 1007.07   3 
   1   3  13 23151.6 703.730   2 
  -1  -3 -13 23419.7 756.182   1 
  -1  -3 -14 5721.11 388.738   1 
  -1  -3  14 8438.70 683.659   2 
   1  -3  14 5693.34 507.568   1 
   1  -3  14 8727.59 705.868   2 
  -1   3 -14 5356.02 315.980   3 
   1  -3  14 6143.39 344.968   3 
  -1   3  14 7344.02 612.099   3 
   1   3  14 6110.94 558.192   3 
   1   3 -14 5642.39 357.031   3 
   1  -3 -14 5835.59 588.847   3 
   1   3 -14 5774.79 488.320   2 
   1   3  14 6051.16 376.429   2 
  -1  -3 -15 44516.9 1385.94   3 
   1  -3  15 42613.2 1340.90   1 
  -1  -3 -15 42239.7 1035.12   1 
   1   3 -15 41305.4 1283.65   2 
  -1   3 -15 43796.5 879.891   3 
   1  -3  15 45218.9 1356.63   2 
   1  -3 -15 42588.3 1391.59   3 
  -1  -3  15 44032.9 1297.74   2 
   1   3 -15 42018.4 980.448   3 
  -1   3  15 45118.6 1419.35   3 
   1   3  15 44385.3 1397.72   3 
   1   3  15 42135.3 969.525   2 
   1  -3  15 43456.9 891.830   3 
  -1  -3  16 22767.0 1000.65   2 
  -1  -3 -16 25295.8 1091.93   3 
   1   3  16 21295.9 700.922   2 
   1   3 -16 19567.3 692.016   3 
   1  -3  16 21551.8 663.661   3 
   1   3 -16 19597.7 910.206   2 
   1  -3 -16 21572.4 1069.49   3 
   1  -3  16 19526.8 930.775   1 
  -1   3 -16 19896.5 639.977   3 
   1  -3  16 24152.3 1042.69   2 
  -1  -3 -16 19686.5 714.609   1 
  -1   3  16 22220.6 1035.61   3 
   1   3  16 20875.8 1001.29   3 
   1  -3  17 7186.45 584.769   1 
  -1  -3  17 8366.12 647.504   2 
  -1   3 -17 7973.12 427.423   3 
  -1  -3 -17 8608.64 691.084   3 
   1  -3 -17 8292.55 720.672   3 
   1  -3  17 8351.82 655.867   2 
   1   3 -17 7860.31 462.088   3 
  -1  -3 -17 7179.19 457.674   1 
  -1   3  17 8154.75 664.205   3 
   1   3 -17 7549.60 579.046   2 
   1   3  17 8132.57 649.218   3 
   1  -3  17 7644.60 421.455   3 
   1   3 -18 589.982 172.181   3 
  -1  -3  18 1027.87 337.609   2 
   1  -3  18 738.037 182.177   3 
  -1  -3 -18 1033.38 358.969   3 
   1  -3  18 995.131 269.674   1 
   1   3  18 908.856 196.029   1 
  -1   3 -18 978.409 200.760   3 
   1   3 -18 523.202 179.464   2 
   1  -3  18 1194.24 321.685   2 
  -1  -3 -18 703.896 190.195   1 
   1  -3 -18 1121.23 361.191   3 
  -1  -3  19 77.0924 158.285   1 
   1   3 -19 268.203 160.693   3 
  -1  -3  19 603.372 284.890   2 
   1   3 -19 226.100 170.969   2 
  -1  -3 -19 662.021 326.383   3 
   1  -3  19 269.999 133.360   3 
   1  -3  19 401.079 212.606   1 
  -1  -3 -19 164.545 135.551   1 
   1  -3 -19-72.3810 230.107   3 
   1  -3  19 228.590 242.154   2 
   1   3  19 115.829 105.332   1 
  -1   3 -19 486.648 173.109   3 
   1   3  20 6362.03 458.816   1 
  -1  -3  20 6450.88 556.984   1 
   1  -3  20 6255.57 576.776   1 
  -1  -3  20 7549.98 634.328   2 
   1  -3 -20 5821.40 625.656   3 
  -1  -3 -20 6247.39 442.167   1 
   1   3 -20 6553.52 488.887   3 
   1  -3  20 6416.15 446.135   3 
  -1   3 -20 7422.54 476.722   3 
   1  -3  20 6948.02 634.321   2 
  -1  -3 -20 7522.90 709.224   3 
   1  -3 -21 18281.4 1052.67   3 
   1  -3  21 17976.9 757.836   3 
   1   3 -21 16556.9 761.885   3 
   1   3  21 18856.4 774.764   1 
  -1  -3 -21 21042.7 1105.97   3 
   1  -3  21 18118.4 998.421   2 
  -1  -3  21 17021.9 919.196   1 
  -1  -3  21 19480.2 975.978   2 
  -1  -3 -21 17073.3 718.068   1 
  -1   3 -21 19695.7 782.143   3 
   1  -3  22 23570.5 1123.05   2 
   1  -3  22 22348.8 867.766   3 
  -1  -3 -22 22178.9 831.305   1 
   1   3 -22 22326.5 908.887   3 
   1   3  22 22295.4 866.862   1 
   1  -3 -22 23341.1 1204.53   3 
  -1  -3  22 22276.6 1053.66   1 
  -1  -3 -22 24288.1 1221.67   3 
  -1  -3  22 23429.9 1068.68   2 
  -1   3 -22 23329.6 866.648   3 
  -1  -3  23 9029.41 683.249   1 
   1  -3  23 10934.3 799.995   2 
  -1  -3  23 11445.9 794.048   2 
  -1  -3 -23 10637.6 852.424   3 
   1   3 -23 9529.38 615.750   3 
   1  -3  23 9395.65 587.412   3 
  -1  -3 -23 8583.51 528.902   1 
   1  -3 -23 10869.9 887.822   3 
   1   3  23 9478.95 584.367   1 
  -1   3 -23 9926.53 616.088   3 
   1  -3  24 6824.91 656.574   2 
  -1  -3 -24 6443.01 463.593   1 
  -1  -3 -24 6829.18 682.647   3 
  -1  -3  24 7967.46 655.871   2 
  -1  -3  24 6785.36 604.906   1 
   1   3 -24 6636.35 542.157   3 
   1   3  24 6274.09 480.765   1 
  -1   3 -24 7771.68 549.784   3 
   1  -3 -24 7099.12 726.590   3 
   1  -3  24 6597.16 507.938   3 
   1  -3 -25 1422.96 402.937   3 
   1   3  25 1417.26 261.599   1 
  -1  -3  25 1120.44 345.296   2 
  -1  -3 -25 1261.10 237.522   1 
   1  -3  25 1396.00 266.494   3 
   1  -3  25 1830.64 389.185   2 
   1   3 -25 1295.86 279.742   3 
  -1   3 -25 1730.89 317.826   3 
  -1  -3 -25 1336.06 407.965   3 
   1  -3 -26 2191.66 482.338   3 
   1   3  26 1967.80 291.320   1 
  -1  -3  26 2113.16 395.141   2 
  -1  -3 -26 1886.32 273.131   1 
   1  -3  26 2421.78 455.899   2 
  -1   3 -26 2040.63 348.810   3 
  -1  -3 -26 1623.68 424.551   3 
   1  -3  26 2086.24 341.951   3 
   1   3 -26 1655.40 315.730   3 
  -1  -3  27 8407.15 702.222   2 
  -1  -3 -27 8157.10 546.085   1 
  -1  -3 -27 8373.38 807.809   3 
   1  -3 -27 8545.96 827.161   3 
   1  -3  27 7777.58 615.915   3 
   1   3 -27 8079.09 629.943   3 
   1  -3  27 8222.50 735.566   2 
   1   3  27 8065.03 557.457   1 
  -1   3 -27 8310.49 608.724   3 
  -1  -3 -28 3809.11 578.517   3 
  -1  -3  28 3804.54 516.303   2 
  -1   3 -28 4086.73 458.850   3 
   1  -3 -28 3431.20 548.627   3 
  -1  -3 -28 2974.89 345.014   1 
   1   3  28 3424.97 379.656   1 
   1  -3  28 3221.76 423.689   3 
   1  -3  28 3480.80 532.543   2 
   1   3 -28 3535.22 424.713   3 
   1   3  29 616.771 191.637   1 
   1  -3  29 831.872 333.580   2 
  -1  -3 -29 728.533 342.539   3 
  -1  -3  29 605.233 260.920   2 
  -1  -3 -29 580.542 198.380   1 
   1   3 -29 770.036 250.216   3 
  -1   3 -29 781.472 279.451   3 
   1  -3 -29 1067.16 350.063   3 
  -1  -3 -30 703.654 391.468   3 
  -1  -3  30 1138.84 321.831   2 
  -1   3 -30 1133.20 310.790   3 
   1  -3  30 1059.27 334.663   2 
   1   3  30 940.267 223.785   1 
   1   3 -30 521.142 240.740   3 
  -1  -3 -30 755.278 208.208   1 
   1  -3 -30 990.822 379.716   3 
  -1  -3  31 693.886 291.057   2 
  -1   3 -31-18.0201 196.033   3 
   1  -3 -31 376.729 309.980   3 
   1  -3  31 551.522 268.005   2 
  -1  -3 -31-43.2202 274.275   3 
   1   3 -31 283.275 218.138   3 
  -1  -3 -31 205.040 144.446   1 
   1   3  31-27.0431 111.858   2 
   1   3  32 1164.63 214.966   2 
   1   3 -32 1282.99 298.963   3 
  -1  -3 -32 1118.62 430.663   3 
  -1  -3  32 869.377 294.320   2 
   1  -3 -32 672.900 391.401   3 
  -1  -3 -32 1156.44 256.177   1 
  -1   3 -32 827.479 255.352   3 
   1  -3  32 882.397 315.131   2 
  -1  -3  33 655.604 264.429   2 
  -1  -3 -33 675.338 205.098   1 
  -1   3 -33 643.325 286.846   3 
  -1  -3 -33 817.646 380.899   3 
   1  -3 -33 340.335 297.887   3 
   1  -3  33 271.268 221.407   2 
   1   3 -33 694.872 230.534   3 
   1  -3  34 1359.53 353.921   2 
  -1  -3  34 1326.93 347.434   2 
   1   3 -34 1163.36 360.486   3 
  -1   3 -34 2009.38 417.896   3 
   1  -3 -34 1311.03 438.626   3 
  -1  -3 -34 1214.67 424.342   3 
   1  -3  35 837.443 307.658   2 
  -1   3 -35 1026.92 318.553   3 
  -1  -3  35 516.445 269.858   2 
  -1  -3 -35 986.032 415.127   3 
   1  -3 -35 475.886 267.236   3 
   1   3 -35 504.840 268.230   3 
  -1  -3  36 131.856 214.717   2 
   1  -3 -36-48.4837 400.758   3 
   1   3 -36 160.569 217.817   3 
   1  -3  36 60.1897 258.994   2 
  -1  -3 -36 89.8216 302.267   3 
  -1   3 -36 291.880 258.969   3 
   1  -3 -37 1019.57 434.764   3 
  -1   3 -37 1879.77 426.063   3 
   1  -3  37 1161.24 407.527   2 
   1   3 -37 1636.06 391.521   3 
  -1  -3 -37 1801.88 538.931   3 
  -1  -3  37 1799.97 406.124   2 
  -1  -3  38 3431.13 539.697   2 
   1  -3 -38 3208.31 602.672   3 
   1  -3  38 2888.67 563.626   2 
  -1  -3 -38 2692.00 595.108   3 
  -1   3 -38 3610.60 565.626   3 
   1   3 -38 2899.54 483.112   3 
   1  -3 -39-168.812 299.072   3 
   1  -3  39 645.507 372.596   2 
  -1  -3 -39 169.254 333.286   3 
   1   3 -39 682.806 371.891   3 
  -1   3 -39 861.773 338.973   3 
   1  -3 -40 972.436 322.942   3 
   1  -3  40 1700.70 472.269   2 
  -1  -3 -40 1539.07 484.412   3 
   1  -3 -41-208.378 375.061   3 
  -1  -3 -41 125.021 294.439   3 
  -1  -3 -42 649.115 420.901   3 
   1  -3 -42 1555.43 474.950   3 
   1  -3 -43 1472.41 503.023   3 
  -1  -3 -43 1113.65 485.479   3 
   1  -4   0-283.370 229.039   2 
  -1  -4   0 301.843 249.985   2 
   1   4   0 387.927 210.475   2 
  -1   4   0 178.860 144.175   3 
  -1  -4   0 453.575 202.691   3 
   1   4   0 68.0023 146.211   3 
   1   4  -1 170631. 2284.03   2 
  -1  -4  -1 171133. 2177.00   2 
   1   4   1 168572. 2202.01   2 
   1   4  -1 166060. 1706.86   3 
   1  -4   1 163663. 1502.95   3 
   1  -4   1 162874. 2063.41   2 
  -1  -4   1 169477. 2242.43   2 
   1  -4  -1 166510. 2030.72   2 
  -1  -4  -1 165869. 1831.84   3 
   1  -4  -1 165897. 1744.10   3 
  -1   4  -1 162322. 2083.71   2 
  -1   4   1 167707. 1763.12   3 
  -1   4   1 168876. 1986.64   2 
   1   4   1 167168. 1867.30   3 
   1   4   2 24128.6 748.754   3 
   1  -4   2 22593.2 859.337   2 
   1   4  -2 24718.6 895.854   2 
   1   4   2 24153.3 835.905   2 
  -1  -4  -2 24464.6 843.561   2 
  -1   4   2 24362.8 712.296   3 
  -1  -4  -2 23361.0 738.059   3 
  -1   4  -2 24939.8 885.731   2 
   1  -4  -2 26779.9 851.717   3 
  -1   4   2 25037.8 796.758   2 
  -1  -4   2 24825.1 900.981   2 
   1  -4  -2 29219.0 898.190   2 
   1   4  -2 23251.1 615.619   3 
   1   4   3 38568.7 966.367   3 
   1  -4  -3 34920.2 897.284   2 
  -1  -4  -3 38896.9 1051.30   2 
   1  -4   3 44670.2 709.820   3 
  -1  -4   3 37576.9 1113.69   2 
   1   4  -3 35552.0 743.063   3 
   1   4   3 38534.3 1038.81   2 
   1   4  -3 38362.0 1113.82   2 
  -1   4   3 39522.8 940.962   3 
  -1  -4  -3 36635.5 942.548   3 
   1  -4  -3 39385.3 950.212   3 
  -1   4   3 38878.0 911.791   2 
   1  -4   3 38887.8 1090.52   2 
  -1   4   4 4736.20 374.016   3 
  -1  -4  -4 5066.16 420.101   2 
  -1  -4   4 3989.68 438.963   2 
   1   4  -4 4275.04 409.954   2 
   1   4   4 4724.16 398.680   3 
   1   4  -4 4401.97 268.644   3 
   1  -4   4 5068.47 479.349   2 
   1  -4  -4 6024.88 543.109   3 
  -1   4   4 4969.48 376.213   2 
  -1  -4  -4 4169.66 374.535   3 
   1  -4  -4 4641.18 325.968   2 
   1   4   4 4043.34 362.566   2 
  -1   4   5 54898.5 1205.23   3 
  -1  -4  -5 54334.4 1184.00   2 
   1  -4   5 53183.5 1355.23   1 
   1  -4   5 53684.6 575.563   3 
  -1   4   5 50016.0 994.259   2 
   1  -4   5 53668.3 1330.36   2 
   1  -4  -5 51307.1 1181.94   3 
   1   4   5 54285.1 1228.76   3 
   1  -4  -5 53741.5 1008.64   2 
   1   4   5 54114.1 1185.71   2 
  -1  -4  -5 51930.3 1189.86   3 
   1   4  -5 52695.0 1346.90   2 
  -1  -4   5 53115.2 1348.17   2 
   1  -4  -6 10949.1 459.808   2 
  -1  -4  -6 11571.1 614.851   3 
  -1  -4  -6 10683.7 544.510   2 
   1  -4  -6 12328.3 709.435   3 
   1   4   6 11150.2 549.857   2 
  -1   4   6 12102.4 480.490   2 
   1   4  -6 11079.7 646.879   2 
   1  -4   6 11026.3 652.806   1 
   1   4   6 11525.3 604.168   3 
  -1  -4   6 10495.2 640.650   2 
  -1   4   6 11502.9 625.457   3 
   1  -4   6 13220.5 778.228   2 
  -1  -4   7 8671.38 616.817   2 
   1   4   7 7924.42 465.393   2 
   1   4  -7 8615.16 594.993   2 
   1  -4   7 10082.7 674.210   2 
  -1   4   7 8123.35 391.002   2 
  -1   4   7 9027.68 563.467   3 
   1  -4  -7 8875.43 576.639   3 
   1  -4   7 9212.83 589.703   1 
  -1  -4  -7 8773.20 550.431   3 
   1   4   7 8397.73 542.245   3 
   1  -4  -7 8301.20 394.342   2 
  -1  -4  -7 9148.01 492.834   2 
  -1   4   8 2309.56 436.735   3 
   1  -4  -8 2419.40 543.591   3 
   1   4  -8 967.747 249.762   2 
   1  -4   8 967.573 247.115   1 
   1  -4  -8 671.267 146.994   2 
  -1  -4  -8 903.820 224.268   2 
   1   4   8 734.773 222.040   2 
   1   4   8 832.041 294.279   3 
  -1  -4  -8 2469.69 506.895   3 
  -1   4   8 2672.60 289.387   2 
  -1  -4   8 966.396 614.236   2 
  -1   4   9 141153. 1347.62   2 
   1   4  -9 134736. 2301.72   2 
  -1  -4   9 138365. 2276.71   2 
  -1  -4  -9 142303. 1834.73   2 
   1  -4  -9 135885. 2174.21   3 
   1  -4  -9 140152. 1366.45   2 
  -1  -4  -9 134959. 2156.96   3 
   1  -4   9 139561. 2313.43   2 
   1   4   9 137078. 2203.13   3 
   1  -4   9 139699. 2350.47   1 
  -1   4   9 138986. 2215.34   3 
   1   4   9 140537. 1851.41   2 
  -1  -4 -10 3135.05 543.919   3 
  -1   4  10 1283.34 397.203   3 
  -1  -4  10 750.268 316.192   2 
   1   4  10 518.944 190.267   2 
   1  -4  10-90.6566 141.260   1 
  -1  -4 -10 325.554 213.105   1 
   1  -4 -10 4110.58 743.886   3 
   1   4 -10 238.757 219.408   2 
  -1   4  10 1309.36 218.746   2 
   1   4  10 461.360 229.092   3 
   1  -4  10 5229.87 753.181   2 
  -1  -4  11 6012.47 536.614   2 
   1   4  11 6173.63 403.812   2 
  -1   4  11 6654.01 539.148   3 
  -1  -4 -11 5865.27 412.711   1 
   1  -4 -11 5435.22 222.157   2 
  -1   4  11 5687.17 253.197   2 
  -1  -4 -11 5999.17 517.817   3 
   1  -4  11 6044.49 531.586   1 
   1   4 -11 6246.94 290.778   3 
   1  -4 -11 6090.32 541.317   3 
   1  -4  11 6918.19 580.180   2 
   1   4  11 6494.66 542.849   3 
   1   4 -11 5811.24 514.248   2 
   1  -4  12 3332.08 159.799   3 
  -1   4  12 3750.36 438.085   3 
  -1  -4  12 4467.26 508.070   2 
  -1  -4 -12 3674.18 342.559   1 
   1  -4  12 3742.98 434.884   1 
   1  -4 -12 3536.22 184.179   2 
   1   4 -12 3497.18 239.384   3 
   1   4  12 3736.42 324.940   2 
  -1  -4 -12 4408.90 483.343   3 
   1   4 -12 4007.42 428.032   2 
   1   4  12 3475.15 427.401   3 
   1  -4 -12 3759.88 468.221   3 
   1  -4  12 4101.47 467.278   2 
   1   4  13 1507.25 218.951   2 
   1  -4  13 1534.10 313.074   2 
  -1   4  13 2049.89 354.088   3 
  -1  -4 -13 1577.74 327.769   3 
  -1  -4 -13 1542.54 246.883   1 
   1  -4  13 1626.50 128.727   3 
   1  -4 -13 985.620 304.322   3 
   1   4 -13 1576.93 173.236   3 
  -1  -4  13 1515.93 328.988   2 
   1  -4  13 1401.19 292.562   1 
   1   4  13 1901.96 344.471   3 
   1   4 -13 1592.15 298.251   2 
   1  -4 -13 1506.51 143.945   1 
   1   4  14 149.040 102.333   2 
   1  -4 -14 455.791 294.646   3 
   1   4 -14 165.966 200.850   2 
   1  -4  14 415.479 225.559   1 
  -1   4  14 574.516 250.804   3 
  -1  -4 -14 333.237 322.156   3 
   1  -4  14 609.406 298.214   2 
   1   4  14 337.237 234.394   3 
   1  -4 -14 242.396 78.2649   1 
   1   4 -14 110.994 106.877   3 
  -1  -4  14 1237.81 351.149   2 
  -1  -4 -14 400.156 167.243   1 
   1  -4  14 318.700 94.4993   3 
   1   4 -15 10707.0 454.326   3 
  -1  -4 -15 10960.7 725.858   3 
  -1  -4  15 10919.1 728.309   2 
   1   4  15 10847.1 518.859   2 
   1  -4 -15 11101.2 748.191   3 
   1  -4  15 10855.2 370.171   3 
   1   4 -15 10667.9 713.548   2 
   1  -4  15 11331.2 740.027   2 
   1   4  15 11401.8 759.567   3 
  -1  -4 -15 10638.4 546.809   1 
  -1   4  15 10849.2 729.364   3 
   1  -4 -15 10255.3 326.223   1 
   1  -4  15 10990.7 730.683   1 
   1  -4  16 112.747 269.651   2 
   1  -4 -16 458.651 379.689   3 
  -1  -4 -16-55.1015 301.732   3 
  -1  -4  16 582.912 311.166   2 
  -1  -4 -16 83.8074 122.891   1 
   1  -4  16-19.7542 185.139   1 
   1   4 -16 56.6516 121.533   3 
   1   4 -16 66.1162 171.691   2 
   1   4  16 72.2718 109.172   2 
   1  -4 -16 58.6520 44.5811   1 
   1  -4  16 343.970 127.189   3 
   1  -4 -17 4519.69 534.627   3 
   1  -4  17 5233.75 552.407   2 
   1  -4  17 4664.82 285.596   3 
   1  -4 -17 4118.34 188.004   1 
  -1  -4  17 5007.79 525.049   2 
   1   4 -17 4257.20 467.643   2 
   1  -4  17 4588.11 501.379   1 
   1   4 -17 4596.06 328.667   3 
  -1  -4 -17 4287.69 362.291   1 
  -1   4 -17 4586.70 287.671   3 
  -1  -4 -17 5008.69 555.950   3 
   1   4  17 4581.18 355.041   2 
   1  -4  18 7411.78 643.616   2 
  -1  -4  18 7132.40 621.613   2 
   1  -4 -18 6631.11 228.071   1 
   1  -4 -18 7627.74 662.188   3 
  -1  -4 -18 7228.06 470.394   1 
   1   4  18 7122.95 434.197   2 
  -1  -4 -18 7816.53 673.134   3 
   1  -4  18 7665.49 381.188   3 
   1   4 -18 7278.64 422.412   3 
  -1   4 -18 6958.76 370.243   3 
   1   4 -18 7144.71 615.505   2 
  -1  -4 -19 701.544 367.055   3 
   1   4  19 48.7878 101.001   2 
   1  -4  19 249.725 140.986   3 
  -1  -4  19 636.238 311.709   2 
  -1  -4 -19 145.106 131.943   1 
   1  -4  19 493.754 342.412   2 
   1   4 -19 246.211 163.351   3 
   1  -4 -19 412.162 351.902   3 
  -1   4 -19 171.135 126.442   3 
   1   4  20 2834.58 284.296   2 
   1  -4 -20 2852.51 477.090   3 
   1  -4  20 3179.35 452.750   2 
  -1  -4 -20 2373.26 286.877   1 
  -1  -4 -20 2900.88 446.254   3 
   1   4 -20 2842.02 304.180   3 
  -1   4 -20 2870.45 276.412   3 
  -1  -4  20 3571.63 467.575   2 
   1  -4  20 3260.37 282.412   3 
   1   4 -21 235.090 172.012   3 
  -1  -4  21 1032.49 357.274   2 
   1  -4 -21 856.445 405.396   3 
   1  -4  21 529.572 309.022   2 
  -1  -4 -21 340.830 352.093   3 
  -1   4 -21 343.794 164.264   3 
   1  -4  21 135.931 131.163   3 
   1   4  21 207.801 141.809   2 
  -1  -4 -21 183.288 127.485   1 
  -1   4 -22 7474.11 482.972   3 
  -1  -4  22 8197.76 774.179   2 
   1  -4  22 6708.58 460.526   3 
   1   4 -22 6894.55 507.767   3 
   1   4  22 6228.75 452.560   2 
  -1  -4 -22 9894.29 909.365   3 
  -1  -4 -22 6078.57 449.206   1 
   1  -4 -22 8451.90 876.013   3 
   1  -4  22 6687.12 722.060   2 
  -1   4 -23 43994.7 1118.09   3 
  -1  -4  23 44411.1 1578.88   2 
  -1  -4 -23 42314.8 1179.17   1 
   1   4  23 43476.3 1088.10   2 
   1   4 -23 42060.2 1194.53   3 
  -1  -4 -23 45859.2 1725.15   3 
   1  -4 -23 42363.0 1678.86   3 
   1  -4  23 41595.0 1575.00   2 
   1  -4  23 42995.7 1133.01   3 
   1  -4 -24 6353.83 816.654   3 
  -1  -4 -24 4398.73 388.170   1 
   1  -4  24 5625.01 469.519   3 
   1   4  24 4393.96 405.550   2 
   1  -4  24 8168.39 781.112   2 
  -1   4 -24 6226.31 504.486   3 
   1   4 -24 6334.75 549.039   3 
  -1  -4 -24 7953.25 865.287   3 
  -1  -4  24 7453.31 743.129   2 
  -1  -4  25 10987.3 863.213   2 
   1  -4  25 10472.9 851.422   2 
   1   4  25 11076.5 563.288   2 
   1  -4  25 11572.6 643.916   3 
  -1   4 -25 11406.6 633.421   3 
   1   4 -25 10722.4 643.274   3 
   1  -4 -25 11727.3 941.672   3 
  -1  -4 -25 10928.0 616.187   1 
  -1  -4 -25 11304.0 911.991   3 
  -1   4 -26 609.756 227.483   3 
   1  -4 -26 731.906 377.200   3 
  -1  -4  26 1076.28 374.916   2 
   1   4 -26 652.027 260.748   3 
   1   4  26 375.306 161.575   2 
   1  -4  26 605.480 206.615   3 
  -1  -4 -26 501.454 367.987   3 
  -1  -4 -26 254.897 146.765   1 
   1  -4  26 827.476 326.292   2 
   1  -4  27 175.195 212.534   2 
  -1  -4 -27 150.344 289.548   3 
  -1  -4  27 244.133 228.020   2 
  -1  -4 -27-130.261 155.904   1 
  -1   4 -27 281.550 177.217   3 
   1  -4  27 238.458 161.768   3 
   1   4  27 221.613 116.978   2 
   1   4 -27 13.3772 188.464   3 
   1  -4 -27-495.396 321.385   3 
  -1  -4  28 87.4211 239.127   2 
   1  -4  28 23.9372 251.585   2 
  -1   4 -28 150.363 139.293   3 
   1   4  28 161.429 92.8888   2 
  -1  -4 -28 74.4537 259.368   3 
   1  -4 -28-109.385 354.131   3 
   1  -4  28 206.582 134.436   3 
   1   4 -28 60.6188 151.782   3 
  -1  -4 -28 69.2054 125.708   1 
   1   4 -29 749.425 216.144   3 
   1  -4  29 1416.03 408.448   2 
   1  -4 -29 991.033 379.703   3 
  -1  -4 -29 467.674 335.722   3 
  -1  -4 -29 659.931 198.692   1 
  -1  -4  29 560.164 273.245   2 
  -1   4 -29 660.909 216.353   3 
   1  -4  29 698.339 194.519   3 
  -1  -4 -30 430.309 213.269   1 
  -1  -4  30 929.579 406.654   2 
  -1  -4 -30 1337.04 519.480   3 
   1  -4  30 1082.55 473.292   2 
   1  -4 -30 962.777 441.107   3 
   1   4 -30 918.465 318.050   3 
  -1   4 -30 1007.25 334.885   3 
  -1   4 -31 22833.8 1026.99   3 
   1   4 -31 22413.5 1052.94   3 
  -1  -4  31 21383.7 1245.35   2 
   1  -4 -31 22061.2 1408.86   3 
   1  -4  31 21647.3 1301.10   2 
  -1  -4 -31 22357.9 914.713   1 
  -1  -4 -31 20510.4 1347.66   3 
  -1   4 -32 3169.49 472.320   3 
   1  -4  32 3223.90 606.554   2 
  -1  -4  32 3736.90 617.477   2 
  -1  -4 -32 3266.70 692.629   3 
   1   4 -32 2848.56 454.746   3 
   1  -4 -32 3635.41 723.674   3 
   1   4 -33 10691.6 772.125   3 
  -1  -4  33 11320.3 939.408   2 
  -1  -4 -33 11989.3 1091.94   3 
   1  -4  33 10585.9 940.527   2 
   1  -4 -33 11315.0 1048.48   3 
  -1   4 -33 11333.8 764.147   3 
   1  -4  34 1369.28 444.720   2 
  -1  -4  34 1987.20 457.132   2 
   1  -4 -34 1420.20 456.429   3 
  -1   4 -34 1315.79 343.898   3 
  -1  -4 -34 1599.15 487.769   3 
   1   4 -34 1126.53 310.193   3 
  -1  -4  35 540.865 309.894   2 
  -1  -4 -35 13.1518 295.901   3 
  -1   4 -35 138.607 196.759   3 
   1   4 -35 12.7043 178.108   3 
   1  -4 -35-384.711 385.260   3 
   1  -4  35 226.455 268.979   2 
   1  -4  36 1838.92 465.876   2 
   1   4 -36 2102.38 381.949   3 
  -1  -4 -36 1895.19 494.812   3 
   1  -4 -36 1563.23 418.970   3 
  -1  -4  36 2855.58 526.064   2 
   1  -4  37 820.307 351.371   2 
  -1  -4  37 478.124 309.967   2 
   1  -4 -37 682.205 342.521   3 
  -1  -4 -37 349.887 323.028   3 
   1  -4  38 485.978 334.601   2 
  -1  -4 -38 903.343 449.429   3 
  -1  -4  38 1271.39 407.483   2 
   1  -4 -38 602.859 378.542   3 
  -1  -4 -39 2599.98 630.479   3 
   1  -4  39 1855.01 471.064   2 
  -1  -4  39 999.047 330.064   2 
   1  -4 -39 1582.46 531.951   3 
  -1  -4 -40 499.486 411.180   3 
   1  -4  40-19.4373 285.484   2 
   1  -4 -40 186.531 357.375   3 
   1  -4 -41 102.341 329.658   3 
   1  -4  41 375.207 276.842   2 
  -1  -4 -41-208.650 309.431   3 
  -1  -4 -42-27.1114 396.020   3 
  -1  -5   0 215.094 239.006   2 
   1  -5   0-107.588 227.207   2 
  -1  -5   0 46.7551 166.500   3 
   1  -5   0-67.0402 148.839   3 
   1   5   0 5.49930 138.820   3 
  -1   5   0 169.177 190.372   2 
  -1   5   0 250.179 153.775   3 
   1   5   0 218.357 202.854   2 
   1   5   1 7875.72 553.739   2 
  -1  -5  -1 7367.83 445.610   3 
  -1   5   1 7532.99 413.273   3 
   1  -5   1 6172.62 405.815   2 
   1   5  -1 8286.66 577.156   2 
  -1  -5   1 7677.25 563.670   2 
  -1   5  -1 7204.83 365.869   3 
  -1   5   1 7032.34 484.645   2 
   1  -5  -1 7388.34 482.995   2 
   1   5  -1 7236.94 411.053   3 
  -1  -5  -1 7692.06 551.418   2 
   1  -5  -1 7511.95 413.972   3 
   1  -5   1 7919.57 361.808   3 
  -1   5  -1 7721.31 509.036   2 
   1   5   1 7354.48 428.608   3 
   1   5   2 68.6282 150.930   3 
  -1  -5   2 99.5595 218.260   2 
   1   5  -2 377.726 217.471   2 
   1  -5  -2 220.120 170.963   2 
   1  -5   2-622.286 276.538   2 
   1   5   2 560.326 219.135   2 
  -1  -5  -2 239.646 199.703   3 
   1  -5  -2 579.201 216.611   3 
  -1   5   2 346.364 165.471   3 
   1   5  -2-120.376 125.406   3 
   1  -5   2 14.4099 93.2080   3 
  -1  -5  -2 640.367 289.381   2 
  -1   5  -2 117.029 205.362   2 
  -1   5   2 324.876 172.706   2 
  -1  -5   3 10452.9 664.682   2 
   1  -5  -3 8261.94 484.793   2 
   1  -5  -3 10535.5 546.632   3 
   1   5   3 11291.2 567.843   3 
  -1  -5  -3 10427.6 639.510   2 
   1   5  -3 10168.1 433.917   3 
   1   5  -3 10242.5 647.726   2 
  -1  -5  -3 10701.1 554.443   3 
   1  -5   3 10671.9 641.336   2 
  -1   5   3 10194.2 558.468   2 
   1  -5   3 9922.88 353.529   3 
  -1   5   3 10324.5 540.843   3 
   1   5   3 10926.6 625.505   2 
  -1   5  -3 10504.2 638.212   2 
   1  -5  -4 12592.2 569.993   2 
   1   5   4 14119.8 672.999   3 
  -1   5   4 14328.5 636.048   2 
   1   5   4 14016.9 690.467   2 
  -1   5   4 14204.9 651.323   3 
  -1  -5   4 13722.8 752.680   2 
   1   5  -4 13380.4 480.638   3 
  -1  -5  -4 15103.8 735.908   2 
   1  -5   4 14091.1 782.905   2 
   1   5  -4 14183.2 774.912   2 
  -1  -5  -4 12714.3 632.667   3 
   1  -5  -4 15347.5 674.815   3 
  -1   5  -4 14123.5 743.242   2 
   1  -5   4 12507.8 342.570   3 
  -1  -5  -5 27386.0 957.761   2 
   1  -5   5 23294.9 440.688   3 
   1   5  -5 25452.8 605.722   3 
   1  -5  -5 25344.7 807.263   2 
   1   5   5 26285.4 919.591   2 
   1  -5  -5 27939.0 918.748   3 
  -1  -5  -5 26157.6 903.951   3 
  -1   5   5 26684.5 830.090   2 
  -1  -5   5 26524.4 1044.93   2 
  -1   5   5 27695.8 918.410   3 
   1   5  -5 25821.4 1049.18   2 
   1   5   5 26306.6 923.462   3 
   1  -5   5 26805.4 1037.07   2 
   1  -5  -6 2522.33 254.505   2 
   1   5  -6 2959.21 212.509   3 
   1   5  -6 2982.45 393.855   2 
  -1  -5   6 2610.16 401.519   2 
   1   5   6 2499.93 313.444   2 
  -1   5   6 2652.34 341.833   3 
  -1  -5  -6 2490.71 353.555   3 
   1  -5  -6 4629.40 477.472   3 
   1   5   6 3081.00 364.760   3 
   1  -5   6 3485.18 475.811   2 
  -1  -5  -6 2398.81 314.242   2 
  -1   5   6 3315.17 323.138   2 
  -1   5   7 15044.7 744.999   3 
   1   5   7 14236.6 738.912   3 
  -1  -5  -7 14824.6 738.580   3 
   1   5  -7 13902.9 422.031   3 
  -1  -5   7 14194.7 820.025   2 
  -1   5   7 15271.9 593.911   2 
   1  -5  -7 15435.9 764.596   3 
  -1  -5  -7 14646.6 688.718   2 
   1  -5   7 13856.0 790.853   1 
   1   5   7 14012.2 672.879   2 
   1   5  -7 14180.1 801.982   2 
   1  -5  -7 15730.8 632.780   2 
   1  -5   7 15382.2 830.512   2 
   1   5  -8 17910.3 904.534   2 
   1   5   8 17966.0 744.615   2 
   1  -5   8 17813.5 916.768   1 
  -1  -5  -8 18358.2 755.672   2 
   1  -5  -8 20797.5 938.093   3 
  -1   5   8 18719.2 867.574   3 
   1   5   8 17667.9 851.867   3 
   1  -5  -8 18723.4 663.142   2 
   1  -5   8 21915.2 1049.43   2 
  -1  -5  -8 20166.9 928.570   3 
   1   5  -8 16449.2 443.858   3 
  -1   5   8 19475.3 663.931   2 
  -1  -5   8 17036.3 938.255   2 
   1  -5  -9 72944.3 1228.83   2 
   1   5   9 73306.1 1488.52   2 
   1  -5   9 75097.7 1858.96   1 
  -1   5   9 74324.1 1216.94   2 
  -1  -5  -9 73806.2 1670.86   3 
  -1   5   9 76174.9 1727.49   3 
  -1  -5   9 72020.4 1801.50   2 
   1   5   9 74791.1 1732.68   3 
   1   5  -9 72848.2 1824.59   2 
   1  -5  -9 76025.3 1694.50   3 
  -1  -5  -9 74958.1 1492.06   2 
   1  -5   9 71539.4 1784.14   2 
   1  -5  10 3042.77 614.954   2 
   1   5  10 403.341 283.245   3 
   1  -5 -10 3501.80 626.545   3 
  -1  -5 -10 188.413 193.400   2 
   1   5 -10-230.865 206.969   2 
   1  -5 -10-479.186 234.709   2 
  -1  -5 -10 445.176 345.724   3 
  -1  -5  10 914.980 552.808   2 
  -1   5  10 534.247 336.358   3 
   1  -5  10 541.966 292.894   1 
  -1   5  10 1078.22 231.980   2 
   1   5  10 169.897 159.434   2 
  -1  -5 -11 26384.2 1069.12   3 
   1   5  11 27674.8 899.359   2 
  -1   5  11 29788.0 1151.13   3 
   1  -5  11 27653.5 1176.05   1 
   1   5  11 30092.9 1156.12   3 
   1  -5 -11 27158.9 662.224   2 
   1   5 -11 29550.1 1196.51   2 
   1  -5 -11 28190.4 1088.32   3 
  -1  -5  11 28632.3 1187.29   2 
   1  -5  11 29996.0 1173.03   2 
  -1  -5 -11 28114.4 906.689   2 
  -1   5  11 28583.2 695.760   2 
   1  -5  12 266.409 193.636   1 
  -1  -5  12 851.318 370.781   2 
  -1  -5 -12 322.017 172.974   1 
   1   5 -12 229.921 84.2072   3 
   1  -5  12 1029.88 395.101   2 
  -1   5  12 895.585 331.995   3 
  -1  -5 -12 1590.13 400.129   3 
   1  -5 -12 962.701 354.178   3 
   1   5  12 417.740 238.704   3 
   1  -5 -12-114.499 141.881   2 
   1   5  12 390.999 160.754   2 
   1   5 -12 272.028 245.842   2 
  -1   5  12 363.490 120.626   2 
   1  -5  13 2105.75 430.464   2 
   1   5 -13 1704.58 159.608   3 
  -1  -5 -13 1976.79 291.851   1 
   1  -5 -13 2178.98 435.402   3 
   1   5  13 1424.14 251.001   2 
   1  -5 -13 1728.37 165.168   2 
   1   5  13 1285.26 289.394   3 
   1   5 -13 1780.01 326.544   2 
  -1  -5 -13 2193.53 408.098   3 
   1  -5  13 1647.49 354.556   1 
  -1   5  13 1803.82 368.689   3 
  -1   5  13 1606.42 159.155   2 
  -1  -5  13 2709.20 489.003   2 
   1  -5  14 8831.43 698.161   2 
   1   5 -14 7913.39 336.405   3 
   1   5  14 8698.66 502.696   2 
  -1   5  14 8616.77 329.157   2 
   1  -5 -14 8947.83 340.324   2 
  -1  -5 -14 8609.07 690.416   3 
  -1  -5  14 9486.60 734.213   2 
   1  -5 -14 8582.43 701.334   3 
  -1  -5 -14 8942.74 554.781   1 
   1   5 -15 3244.94 232.769   3 
  -1  -5  15 4320.00 561.029   2 
   1  -5 -15 4012.48 552.082   3 
  -1  -5 -15 3064.04 327.472   1 
   1  -5  15 4147.02 532.563   2 
   1  -5 -15 3253.38 241.701   1 
  -1  -5 -15 3768.11 545.424   3 
   1   5  15 3110.61 313.218   2 
  -1  -5 -16 8314.36 529.649   1 
   1  -5 -16 8631.11 793.032   3 
   1   5  16 8732.85 518.835   2 
  -1  -5 -16 9837.37 812.828   3 
   1  -5 -16 7833.92 358.923   1 
  -1  -5  16 11228.7 843.219   2 
   1   5 -16 7492.62 364.157   3 
   1  -5  16 9959.17 813.725   2 
  -1  -5 -17 38123.9 1125.31   1 
   1  -5 -17 37648.6 740.302   1 
  -1  -5 -17 37566.9 1439.85   3 
   1  -5  17 36832.6 1454.43   2 
   1   5  17 37267.4 1021.53   2 
  -1  -5  17 37083.3 1443.07   2 
   1   5 -17 36883.4 813.625   3 
   1  -5 -17 36687.0 1429.56   3 
   1  -5  18 1858.28 489.699   2 
   1  -5 -18 426.826 97.4255   1 
  -1  -5 -18 1934.33 528.900   3 
   1  -5 -18 1019.79 443.654   3 
  -1  -5  18 2026.89 483.568   2 
   1   5 -18 463.017 175.415   3 
   1   5  18 584.915 198.767   2 
  -1  -5 -18 452.323 173.458   1 
   1  -5  19 903.391 360.766   2 
   1   5  19 449.776 163.458   2 
  -1  -5  19 795.372 338.724   2 
   1  -5 -19 693.721 331.808   3 
  -1  -5 -19 406.238 181.866   1 
   1   5 -19 438.954 134.473   3 
  -1  -5 -19 479.379 263.682   3 
   1  -5 -19 278.606 76.7821   1 
   1   5  20 4012.72 365.351   2 
  -1  -5  20 4182.23 566.751   2 
  -1  -5 -20 3232.03 352.374   1 
   1  -5  20 4121.57 569.394   2 
   1  -5 -20 2958.89 181.127   1 
   1  -5 -20 2838.68 494.718   3 
   1   5 -20 3162.71 293.933   3 
  -1  -5 -20 4358.94 590.137   3 
   1   5 -21 10949.9 526.165   3 
  -1  -5  21 11359.8 861.938   2 
   1  -5 -21 10773.4 859.490   3 
   1  -5  21 10269.0 825.289   2 
  -1  -5 -21 11382.6 877.418   3 
   1  -5 -21 9908.22 304.677   1 
  -1  -5 -21 11069.3 624.154   1 
   1   5  21 11219.6 566.129   2 
   1   5 -22 3564.80 331.840   3 
  -1  -5 -22 3156.94 345.234   1 
  -1  -5  22 4757.38 633.370   2 
   1  -5  22 4862.97 642.581   2 
  -1  -5 -22 4229.03 631.856   3 
   1   5  22 3419.51 345.293   2 
   1  -5 -22 3632.38 573.326   3 
   1   5 -23 15195.9 640.219   3 
  -1  -5 -23 15141.0 717.972   1 
  -1  -5  23 15142.9 1012.67   2 
   1  -5  23 13924.4 989.850   2 
   1   5  23 15478.3 661.338   2 
   1  -5 -23 13996.8 998.140   3 
  -1  -5 -23 15312.6 1047.41   3 
   1  -5  24 969.306 386.860   2 
  -1  -5 -24 270.178 347.387   3 
  -1  -5  24 1010.68 350.818   2 
  -1   5 -24 520.728 174.381   3 
   1   5 -24 777.619 228.844   3 
   1   5  24 560.887 199.240   2 
   1  -5 -24 937.577 431.290   3 
  -1  -5 -24 40.2814 142.069   1 
  -1  -5 -25 855.824 218.670   1 
  -1  -5  25 1213.27 380.972   2 
   1  -5  25 1041.02 369.721   2 
   1  -5 -25 555.051 336.244   3 
   1   5 -25 1186.20 227.993   3 
  -1  -5 -25 727.284 331.810   3 
   1   5  25 742.831 189.441   2 
  -1   5 -25 1307.71 221.172   3 
  -1  -5 -26 2547.14 317.900   1 
   1  -5  26 2439.06 503.932   2 
   1   5  26 2527.71 279.600   2 
  -1   5 -26 2944.96 318.799   3 
   1  -5 -26 2425.80 473.290   3 
   1   5 -26 2714.39 320.368   3 
  -1  -5  26 2673.17 502.037   2 
  -1  -5 -26 2585.53 489.559   3 
   1  -5  27 1986.57 455.624   2 
  -1  -5 -27 1338.21 392.552   3 
  -1  -5 -27 1675.30 254.088   1 
   1  -5 -27 1218.38 402.426   3 
   1   5  27 1711.29 231.684   2 
  -1  -5  27 2110.45 461.112   2 
  -1   5 -27 1881.70 262.453   3 
   1   5 -27 1712.26 270.379   3 
   1   5 -28 1556.64 280.423   3 
  -1  -5 -28 1073.32 412.805   3 
   1  -5  28 1233.54 406.435   2 
   1  -5 -28 1487.84 464.060   3 
  -1   5 -28 1737.49 279.566   3 
  -1  -5  28 1537.96 419.006   2 
  -1  -5 -28 1345.04 236.895   1 
  -1  -5 -29 5604.10 715.471   3 
   1  -5  29 6283.50 753.436   2 
  -1  -5 -29 5874.14 463.301   1 
   1   5 -29 6096.23 501.026   3 
   1  -5 -29 5537.30 731.776   3 
  -1   5 -29 6322.86 476.509   3 
  -1  -5  29 6289.55 742.248   2 
   1   5 -30 1658.71 294.551   3 
  -1  -5 -30 1657.56 251.592   1 
  -1   5 -30 1687.50 276.523   3 
  -1  -5 -30 1216.90 448.399   3 
   1  -5  30 1635.09 468.525   2 
   1  -5 -30 1590.34 434.788   3 
  -1  -5  30 1833.98 470.222   2 
   1  -5  31 140.845 255.169   2 
  -1   5 -31 84.0409 143.671   3 
  -1  -5  31 138.314 231.350   2 
  -1  -5 -31 101.574 300.518   3 
   1  -5 -31-8.37381 261.979   3 
   1   5 -31-151.104 144.582   3 
  -1  -5  32-411.438 344.830   2 
  -1  -5 -32 125.433 320.529   3 
   1  -5  32 257.924 318.465   2 
   1   5 -32 20.4460 167.186   3 
   1  -5 -32-456.548 417.163   3 
  -1  -5 -33 284.204 304.092   3 
   1  -5  33 671.092 344.988   2 
  -1  -5  33 354.025 313.549   2 
   1  -5 -33 221.406 294.432   3 
  -1  -5 -34 25.2077 334.296   3 
   1  -5  34-317.988 261.337   2 
   1  -5 -34-298.407 314.891   3 
  -1  -5  34-147.812 236.926   2 
   1  -5  35 778.785 395.952   2 
  -1  -5 -35 463.984 424.912   3 
   1  -5 -35-326.689 384.043   3 
  -1  -5  35 540.891 322.575   2 
  -1  -5  36 780.035 333.157   2 
  -1  -5 -36 476.244 328.038   3 
   1  -5  36-139.630 278.336   2 
   1  -5 -36 1050.37 527.901   3 
   1  -5 -37 4089.24 687.276   3 
  -1  -5  37 4348.67 669.030   2 
  -1  -5 -37 4056.90 671.420   3 
   1  -5  37 5376.98 775.138   2 
   1  -5  38 901.835 403.575   2 
  -1  -5 -38-303.064 374.825   3 
   1  -5 -38 129.018 362.522   3 
  -1  -5  38 44.3395 313.453   2 
   1  -5  39-278.634 333.743   2 
  -1  -5  39-321.335 262.603   2 
  -1  -5 -39 374.151 346.306   3 
   1  -5 -39 371.568 349.286   3 
  -1  -5  40 199.934 239.371   2 
   1  -5  40 692.705 309.728   2 
   1  -5 -40 918.059 375.610   3 
  -1  -5 -40 24.3298 356.401   3 
   1  -5  41 1248.77 456.907   2 
   1  -5  42 1408.53 477.039   2 
  -1  -6   0 286.895 204.461   3 
   1   6   0 174.964 188.100   2 
   1  -6   0 345.249 206.093   3 
   1  -6   0 178.949 208.647   2 
   1   6   0 133.144 148.783   3 
  -1   6   0 151.635 191.187   2 
  -1   6   0 219.463 120.991   3 
  -1  -6   0 207.079 246.608   2 
  -1  -6  -1 1624.48 334.373   2 
   1   6   1 1229.32 262.781   3 
  -1   6   1 1379.78 232.865   3 
  -1  -6  -1 1420.40 263.612   3 
   1   6  -1 1486.77 263.202   3 
   1  -6   1 2773.26 322.264   3 
   1   6   1 1259.22 282.288   2 
   1  -6  -1 1390.71 267.781   3 
   1   6  -1 1261.44 338.962   2 
   1  -6   1 1152.08 253.607   2 
  -1  -6   1 895.859 263.561   2 
  -1   6   1 1332.58 280.718   2 
  -1   6  -1 1111.86 183.344   3 
   1  -6  -1 1454.22 283.709   2 
  -1   6  -1 1495.64 319.345   2 
   1  -6  -2 27886.2 1013.72   2 
   1   6   2 28537.8 1092.03   2 
  -1  -6  -2 29142.8 1088.41   2 
  -1  -6   2 28806.5 1128.43   2 
   1   6  -2 28262.5 1144.46   2 
  -1   6  -2 28235.2 1091.39   2 
   1  -6  -2 26565.2 845.431   3 
  -1   6   2 28515.7 898.188   3 
  -1  -6  -2 27753.4 908.886   3 
  -1   6   2 27670.6 1007.80   2 
   1   6  -2 28562.1 800.742   3 
   1  -6   2 27838.0 1091.85   2 
   1   6   2 29255.5 925.755   3 
   1  -6   2 29018.3 750.603   3 
  -1  -6  -3 177.771 197.453   3 
   1   6   3 569.975 211.177   3 
   1  -6   3 631.370 132.802   3 
  -1  -6   3 422.475 220.606   2 
   1  -6   3 177.922 235.224   2 
   1  -6  -3-193.994 255.328   2 
   1   6  -3 204.418 131.064   3 
  -1  -6  -3 619.682 269.299   2 
   1  -6  -3 515.211 256.096   3 
  -1   6   3 519.747 221.504   2 
   1   6  -3 286.317 234.652   2 
  -1   6  -3 236.156 228.408   2 
  -1   6   3 150.909 188.064   3 
   1   6   3 337.897 194.943   2 
  -1  -6  -4 1759.00 349.830   2 
   1  -6   4 1255.40 304.133   2 
   1   6  -4 1035.00 304.456   2 
  -1  -6   4 654.937 264.046   2 
   1   6   4 1558.60 331.594   3 
   1  -6  -4 1167.38 303.138   3 
   1  -6   4 310.457 155.610   3 
   1   6   4 884.494 265.957   2 
  -1   6   4 1458.58 279.647   2 
  -1   6   4 1210.40 278.956   3 
  -1   6  -4 1295.35 313.455   2 
   1   6  -4 1239.40 178.432   3 
  -1  -6  -4 1468.42 294.816   3 
   1   6  -5 40043.6 1391.81   2 
   1   6   5 41457.8 1271.41   2 
  -1   6   5 41998.1 1154.35   2 
  -1  -6  -5 41204.0 1267.26   2 
   1   6   5 40880.0 1215.04   3 
   1  -6  -5 39310.9 1137.13   3 
  -1  -6  -5 39066.4 1180.24   3 
   1  -6   5 41979.3 1384.74   2 
   1  -6  -5 37350.8 1099.55   2 
  -1   6   5 39898.2 1192.37   3 
   1  -6   5 36028.8 646.241   3 
  -1  -6   5 41300.0 1416.83   2 
  -1   6  -5 40341.1 1350.72   2 
   1   6  -5 40225.1 830.572   3 
   1  -6  -6 5936.45 431.294   2 
   1   6   6 7706.20 568.977   2 
   1   6  -6 7039.74 357.380   3 
  -1  -6   6 6857.03 652.648   2 
   1   6  -6 7263.07 617.281   2 
  -1  -6  -6 8325.19 590.669   2 
   1  -6   6 6705.23 248.354   3 
   1  -6  -6 9527.97 652.417   3 
  -1   6   6 8042.92 536.638   2 
  -1   6   6 8229.57 601.729   3 
   1   6   6 8176.54 603.448   3 
  -1  -6  -6 7170.98 562.770   3 
   1  -6   6 8707.96 763.094   2 
  -1   6  -6 7634.80 644.596   2 
  -1  -6   7 32838.0 1300.24   2 
   1  -6   7 34759.5 1329.44   2 
   1  -6  -7 33498.5 1009.55   2 
   1  -6  -7 35091.8 1151.56   3 
   1   6  -7 32397.4 678.169   3 
  -1  -6  -7 33091.7 1115.62   2 
  -1   6   7 33644.7 1006.14   2 
   1   6   7 33392.8 1182.11   3 
   1   6   7 33941.8 1135.09   2 
  -1   6   7 33521.3 1161.25   3 
  -1  -6  -7 33677.2 1146.81   3 
   1   6  -7 31895.5 1280.47   2 
   1   6   8 36380.0 1175.64   2 
  -1   6   8 38585.4 1276.37   3 
  -1  -6   8 36132.4 1391.83   2 
   1  -6   8 39836.7 1421.54   2 
   1  -6  -8 39459.9 1251.24   3 
  -1  -6  -8 38093.6 1177.59   2 
  -1  -6  -8 37188.8 1246.23   3 
   1   6  -8 36985.7 1382.91   2 
   1   6   8 37880.7 1294.19   3 
  -1   6   8 37450.8 1035.10   2 
   1   6  -8 34614.9 669.171   3 
   1  -6  -8 35773.1 1017.58   2 
   1   6   9 14406.0 728.496   2 
   1  -6  -9 14993.1 820.753   3 
   1   6  -9 13314.8 391.399   3 
   1   6   9 14678.6 822.006   3 
  -1  -6  -9 13755.1 815.057   3 
  -1   6   9 14404.7 809.595   3 
   1  -6   9 14829.8 916.733   2 
  -1   6   9 14383.1 633.331   2 
  -1  -6  -9 15218.2 742.083   2 
   1  -6  -9 13326.1 601.057   2 
  -1  -6   9 14132.7 933.141   2 
   1  -6 -10-495.166 246.093   2 
   1   6  10 156.851 176.714   2 
  -1  -6 -10 631.037 369.211   3 
  -1   6  10 881.453 277.204   3 
  -1  -6 -10 591.341 208.272   2 
   1  -6  10 1195.34 409.061   2 
   1   6 -10 241.176 69.0288   3 
   1   6  10 576.470 258.169   3 
  -1  -6  10 1138.54 416.574   2 
  -1   6  10 800.513 205.461   2 
   1  -6 -10 1292.94 379.514   3 
   1  -6 -11 14785.0 847.345   3 
   1  -6  11 14205.9 895.803   2 
  -1   6  11 15571.7 602.025   2 
  -1   6  11 15216.0 872.907   3 
  -1  -6  11 13808.0 891.149   2 
  -1  -6 -11 14202.3 835.465   3 
  -1  -6 -11 15623.8 734.048   2 
   1  -6 -11 13453.5 555.893   2 
   1   6  11 14547.1 719.122   2 
   1   6 -11 13324.0 357.579   3 
   1   6  11 15570.4 885.409   3 
  -1  -6  12 10991.5 834.378   2 
   1  -6 -12 11610.9 780.947   3 
   1  -6 -12 10379.3 470.577   2 
  -1   6  12 10750.0 492.967   2 
   1   6  12 10515.2 612.306   2 
  -1  -6 -12 11336.3 629.050   2 
   1   6 -12 10240.2 310.628   3 
   1   6 -12 9182.66 292.490   3 
  -1  -6 -12 10632.5 760.799   3 
   1  -6  12 12159.6 866.694   2 
   1  -6 -13 5941.12 604.149   3 
  -1  -6  13 6019.04 625.334   2 
   1  -6 -13 6093.61 357.797   2 
  -1   6  13 6125.62 357.779   2 
  -1  -6 -13 5877.35 589.586   3 
   1   6  13 6060.36 473.548   2 
  -1  -6 -13 6698.77 500.774   2 
   1   6 -13 5383.12 223.944   3 
   1  -6  13 6537.58 661.155   2 
  -1  -6 -14 1668.49 280.113   1 
   1   6  14 1825.44 276.272   2 
   1  -6 -14 1808.55 208.208   2 
   1   6 -14 1450.95 123.160   3 
  -1   6  14 1858.05 199.323   2 
   1  -6 -14 2325.99 439.361   3 
  -1  -6 -14 1605.63 370.203   3 
  -1  -6  14 2232.70 444.418   2 
   1  -6  14 2311.92 441.139   2 
  -1  -6 -15 2953.32 436.005   3 
   1  -6 -15 3616.42 267.592   2 
   1  -6  15 2882.22 479.880   2 
   1   6  15 3285.12 340.502   2 
  -1   6  15 3117.42 243.865   2 
   1   6 -15 2785.31 173.994   3 
   1  -6 -15 3254.90 454.844   3 
  -1  -6  15 3640.66 513.170   2 
  -1  -6 -15 3154.36 364.325   1 
   1   6  16 710.291 192.701   2 
   1   6 -16 495.031 84.5630   3 
  -1  -6  16 877.379 323.099   2 
  -1  -6 -16 690.269 284.417   3 
   1  -6 -16 369.614 294.718   3 
  -1  -6 -16 617.461 194.421   1 
   1  -6  16 749.422 307.042   2 
   1  -6  17 430.081 284.870   2 
   1   6 -17 520.004 92.4664   3 
   1   6  17 583.420 173.398   2 
  -1  -6 -17 645.541 200.252   1 
  -1  -6  17 668.842 336.455   2 
   1  -6 -17 776.359 306.822   3 
  -1  -6 -17 508.046 277.892   3 
   1  -6 -17 558.617 151.467   1 
   1  -6  18 209.595 265.299   2 
   1  -6 -18 553.464 319.971   3 
   1   6  18 112.340 113.149   2 
  -1  -6 -18 59.4985 172.810   1 
   1  -6 -18 13.8309 83.9199   1 
  -1  -6 -18-331.764 288.759   3 
   1   6 -18 107.168 71.9418   3 
  -1  -6  18 178.383 281.649   2 
  -1  -6  19 406.440 297.923   2 
  -1  -6 -19-379.941 290.580   3 
   1  -6 -19 117.203 234.735   3 
   1   6  19 229.233 129.802   2 
   1  -6 -19 26.3073 77.9094   1 
   1   6 -19 45.5172 74.3624   3 
   1  -6  19 115.480 300.858   2 
  -1  -6 -19 0.57489 151.839   1 
   1  -6  20 1496.24 366.949   2 
  -1  -6  20 1538.54 407.596   2 
   1  -6 -20 1101.32 374.248   3 
  -1  -6 -20 929.198 299.635   3 
   1   6  20 871.436 172.523   2 
  -1  -6 -20 1188.35 264.714   1 
   1   6 -20 1051.16 140.429   3 
   1  -6 -20 988.335 144.637   1 
   1  -6 -21 68.9600 61.4034   1 
   1  -6 -21-7.35714 228.403   3 
  -1  -6  21 458.117 300.914   2 
  -1  -6 -21 515.637 313.697   3 
   1  -6  21 182.752 256.756   2 
   1   6 -21 152.544 86.5538   3 
   1   6  21 78.2145 101.682   2 
  -1  -6 -21 212.689 148.721   1 
   1  -6  22-342.720 306.454   2 
  -1  -6  22 287.614 269.676   2 
   1   6 -22 177.733 97.1475   3 
  -1  -6 -22 181.844 266.568   3 
   1  -6 -22 285.901 78.9964   1 
  -1  -6 -22 256.805 151.856   1 
   1  -6 -22 22.2087 307.481   3 
   1   6  22 401.433 159.139   2 
  -1  -6 -23-187.140 315.881   3 
   1  -6 -23 305.899 238.969   3 
   1   6  23 6.43008 104.800   2 
  -1  -6 -23-90.0272 166.934   1 
   1   6 -23 90.8221 82.7729   3 
   1  -6 -23-13.8987 41.3178   1 
   1  -6  23 237.447 255.045   2 
   1  -6  24 1135.82 454.460   2 
   1   6 -24 1476.58 216.336   3 
  -1  -6 -24 2049.46 471.909   3 
   1  -6 -24 1732.61 537.772   3 
  -1  -6 -24 1590.59 273.145   1 
   1   6  24 1547.31 251.015   2 
  -1  -6  24 2691.30 559.130   2 
   1   6  25 13402.3 616.157   2 
   1   6 -25 13595.0 577.845   3 
   1  -6 -25 12324.3 1035.14   3 
  -1  -6  25 14022.7 1046.75   2 
   1  -6  25 13789.9 1058.13   2 
  -1  -6 -25 13423.9 723.043   1 
  -1  -6 -25 13105.6 1044.07   3 
  -1  -6 -26 5228.32 741.245   3 
  -1  -6 -26 4844.68 440.578   1 
   1  -6 -26 4939.11 706.430   3 
  -1  -6  26 5122.90 682.148   2 
   1  -6  26 5508.90 738.783   2 
   1   6 -26 5208.74 390.176   3 
   1  -6  27 667.050 387.510   2 
  -1  -6 -27 611.654 199.901   1 
  -1  -6  27 977.886 383.018   2 
   1  -6 -27 912.524 391.884   3 
   1   6 -27 582.120 184.912   3 
  -1  -6 -27 786.065 418.350   3 
   1   6 -28 2333.45 281.655   3 
  -1  -6  28 2062.99 476.402   2 
   1  -6  28 2607.35 545.071   2 
  -1  -6 -28 1769.78 460.710   3 
   1  -6 -28 1874.30 537.213   3 
  -1  -6 -28 2126.03 299.913   1 
   1  -6 -29 2356.90 498.635   3 
  -1  -6  29 2334.74 506.598   2 
   1  -6  29 2396.13 539.850   2 
  -1  -6 -29 1955.43 473.502   3 
  -1  -6  30 2402.39 543.485   2 
  -1  -6 -30 2021.93 463.250   3 
   1  -6  30 2022.43 525.089   2 
   1  -6 -30 1904.29 471.344   3 
   1  -6  31 450.752 325.874   2 
  -1  -6  31 442.304 325.942   2 
   1  -6 -31 278.000 306.281   3 
  -1  -6 -31 190.192 317.207   3 
   1  -6  32 674.972 356.062   2 
  -1  -6  32 1515.54 449.457   2 
   1  -6 -32 519.973 332.223   3 
  -1  -6 -32 411.914 346.547   3 
  -1  -6 -33 3691.79 675.543   3 
  -1  -6  33 4404.44 691.628   2 
   1  -6  33 3471.91 643.026   2 
   1  -6 -33 3908.33 696.116   3 
   1  -6 -34 1812.86 531.254   3 
   1  -6  34 1619.63 492.989   2 
  -1  -6  34 1937.24 506.397   2 
  -1  -6 -34 2136.59 591.213   3 
   1  -6 -35 2158.63 550.351   3 
   1  -6  35 1542.95 508.195   2 
  -1  -6  35 3074.43 593.852   2 
  -1  -6 -35 2575.95 573.505   3 
   1  -6 -36 305.255 350.001   3 
   1  -6  36-334.127 329.462   2 
  -1  -6  36 235.881 387.431   2 
  -1  -6 -36 144.196 362.190   3 
  -1  -6 -37 1706.70 523.961   3 
  -1  -6  37 1338.19 450.463   2 
   1  -6  37 613.521 406.002   2 
   1  -6 -37 1524.43 535.292   3 
   1  -6  38 507.857 331.523   2 
  -1  -6  38-283.603 303.392   2 
  -1  -6 -38 666.644 449.396   3 
   1  -6 -38 711.484 531.391   3 
  -1  -6  39-264.396 335.339   2 
   1  -6  39 552.080 383.257   2 
   1  -6  40 2065.58 577.132   2 
  -1  -6  40 1223.56 463.292   2 
  -1  -6  41 428.362 367.266   2 
   1  -6  41-235.843 342.239   2 
   1  -6  42 1958.84 590.700   2 
   1   7   0 182.039 155.796   3 
   1  -7   0 44.6178 151.438   3 
  -1  -7   0 37.4131 185.333   3 
   1   7   0-124.778 180.270   2 
   1  -7   0 345.430 267.016   2 
  -1  -7   0-174.082 194.095   2 
  -1   7   0-36.2484 113.728   3 
  -1   7   0-228.846 167.669   2 
  -1   7   1 4462.27 381.338   3 
  -1  -7  -1 4729.99 512.758   2 
   1  -7   1 4784.52 515.592   2 
   1   7   1 4780.63 496.489   2 
   1  -7  -1 5540.77 545.694   2 
   1  -7   1 4068.26 323.626   3 
  -1  -7   1 5122.05 540.838   2 
  -1   7  -1 4818.28 497.448   2 
   1   7  -1 4710.46 369.759   3 
  -1   7   1 4583.84 466.772   2 
   1   7   1 4471.83 391.698   3 
  -1  -7  -1 4353.50 416.818   3 
  -1   7  -1 4548.03 351.507   3 
   1  -7  -1 4627.95 395.122   3 
   1   7  -1 4580.93 510.271   2 
   1  -7   2-17.5403 189.364   2 
   1  -7  -2 244.108 251.988   2 
  -1   7   2 87.6328 139.632   3 
   1   7  -2 133.670 131.970   3 
  -1  -7  -2 206.499 266.091   2 
   1  -7   2-203.519 141.877   3 
   1   7   2 187.608 179.589   2 
   1  -7  -2 183.478 204.687   3 
  -1  -7  -2 220.611 158.952   3 
  -1   7   2 280.524 221.946   2 
  -1   7  -2-246.049 170.621   2 
   1   7   2 92.3316 131.241   3 
  -1  -7   2 397.293 238.389   2 
  -1  -7  -3 2147.53 328.257   3 
   1   7   3 2540.70 343.328   3 
   1   7   3 2663.62 401.809   2 
   1  -7   3 2060.09 372.697   2 
   1  -7  -3 1747.67 270.908   2 
  -1  -7  -3 2346.45 385.545   2 
  -1   7  -3 2239.04 356.574   2 
   1  -7  -3 1839.36 297.176   3 
  -1   7   3 2219.84 311.789   3 
  -1  -7   3 2138.71 372.299   2 
  -1   7   3 2269.22 334.009   2 
   1   7  -3 2107.47 236.984   3 
   1  -7   3 2324.79 222.786   3 
   1  -7  -4 131.234 177.814   3 
   1   7  -4 83.1398 119.743   3 
  -1  -7  -4 253.501 208.683   3 
  -1   7   4-30.3328 131.119   3 
   1  -7   4-64.1035 94.3967   3 
   1   7   4 56.6504 146.124   3 
   1  -7   4 146.323 225.321   2 
   1  -7  -4-698.580 295.114   2 
   1   7   4-111.487 166.633   2 
  -1  -7   4-175.880 253.914   2 
  -1   7   4 234.243 168.543   2 
  -1  -7  -4 543.253 274.700   2 
   1   7   5 3027.92 392.679   2 
  -1  -7  -5 3131.86 387.670   3 
   1  -7   5 3460.10 484.297   2 
  -1  -7  -5 3614.16 461.450   2 
   1  -7  -5 915.382 260.794   2 
   1  -7  -5 3161.25 382.204   3 
  -1   7   5 3565.40 401.043   3 
   1   7  -5 3118.52 269.432   3 
   1  -7   5 3233.08 223.907   3 
  -1   7   5 3736.84 405.976   2 
  -1  -7   5 2513.18 407.966   2 
   1   7   5 3278.12 386.780   3 
  -1   7   6 4692.35 440.677   2 
  -1  -7  -6 5257.59 531.679   2 
   1  -7  -6 4225.72 439.291   3 
  -1  -7  -6 4012.95 436.492   3 
   1   7  -6 3997.68 278.547   3 
   1  -7   6 4136.36 519.622   2 
   1   7   6 3721.72 426.373   3 
   1   7   6 4879.43 492.710   2 
  -1  -7   6 3936.29 500.011   2 
   1  -7   6 4551.03 248.756   3 
   1  -7  -6 2395.82 164.362   2 
  -1   7   6 4154.25 440.299   3 
   1  -7   7-122.358 246.368   2 
   1   7  -7 230.565 123.135   3 
  -1  -7   7-316.225 270.600   2 
   1   7   7 317.905 217.785   2 
   1  -7  -7-677.997 290.599   2 
  -1  -7  -7-288.499 207.550   2 
  -1   7   7 2.28081 160.703   3 
  -1  -7  -7 163.860 239.722   3 
   1  -7  -7 358.142 235.041   3 
   1   7   7 169.590 242.047   3 
  -1   7   7 240.097 189.621   2 
   1  -7   8 2277.77 441.236   2 
  -1  -7   8 2128.47 391.743   2 
   1   7  -8 2147.23 193.760   3 
   1  -7  -8 1489.46 148.434   2 
   1  -7  -8 2701.65 390.273   3 
  -1  -7  -8 2393.91 396.503   3 
   1   7   8 2006.86 338.363   3 
  -1  -7  -8 2156.73 320.452   2 
  -1   7   8 2709.64 387.108   3 
  -1   7   8 2403.92 323.397   2 
   1   7   8 2053.35 332.240   2 
   1   7   9 3947.43 453.408   2 
   1  -7   9 3063.34 465.151   2 
  -1  -7   9 3004.80 432.781   2 
  -1  -7  -9 3469.25 408.139   2 
   1  -7  -9 3163.62 408.582   3 
   1  -7  -9 2680.87 225.444   2 
  -1   7   9 3186.62 414.106   3 
   1   7   9 4148.98 474.456   3 
  -1   7   9 3497.57 361.718   2 
  -1  -7  -9 3884.40 474.487   3 
   1   7  -9 3498.34 210.650   3 
   1  -7 -10-746.076 286.039   2 
   1  -7  10 200.039 269.703   2 
  -1  -7  10 77.4321 254.879   2 
  -1  -7 -10 205.401 268.132   3 
  -1   7  10 211.996 136.341   2 
   1  -7 -10 137.931 256.135   3 
  -1  -7 -10 300.982 200.183   2 
   1   7  10 168.817 226.970   2 
   1   7 -10 298.347 92.3168   3 
  -1  -7 -11 8293.49 594.785   2 
   1   7  11 8157.28 597.002   2 
   1   7 -11 6894.16 249.860   3 
   1  -7 -11 6681.68 444.152   2 
  -1  -7  11 7891.11 768.542   2 
   1  -7 -11 8041.79 672.898   3 
   1  -7  11 8197.90 750.444   2 
  -1  -7 -11 8172.13 697.084   3 
  -1   7  11 7897.22 504.867   2 
   1  -7 -12 16510.7 961.579   3 
   1   7  12 17776.8 853.726   2 
  -1  -7 -12 15935.0 953.412   3 
  -1  -7 -12 17885.1 847.418   2 
  -1   7  12 17911.0 721.378   2 
   1  -7  12 17700.2 1086.54   2 
  -1  -7  12 16178.6 1033.10   2 
   1  -7 -12 16895.1 718.411   2 
   1   7  13 3722.11 419.091   2 
   1  -7  13 3742.24 568.614   2 
  -1  -7  13 4661.74 639.261   2 
  -1  -7 -13 3678.44 412.534   2 
  -1   7  13 3349.23 334.601   2 
   1  -7 -13 2950.82 289.232   2 
   1  -7 -13 4287.59 566.862   3 
  -1  -7 -13 3913.52 559.520   3 
   1  -7 -14 182.469 110.971   2 
   1   7  14 309.092 201.247   2 
  -1  -7 -14 241.094 170.448   2 
  -1   7  14 347.231 154.226   2 
   1  -7  14 302.030 296.962   2 
  -1  -7  14 233.984 338.093   2 
   1  -7 -14 606.289 286.895   3 
  -1  -7 -14 387.081 274.038   3 
   1   7  15 4403.37 419.556   2 
  -1  -7  15 5139.94 635.358   2 
   1  -7  15 4471.58 587.542   2 
   1  -7 -15 5132.08 363.947   2 
  -1   7  15 4833.01 355.956   2 
  -1  -7 -15 4828.59 468.970   1 
  -1  -7 -15 4391.31 550.221   3 
   1  -7 -15 4374.27 552.297   3 
   1  -7  16 3259.94 534.964   2 
  -1  -7 -16 3101.61 391.683   1 
   1  -7 -16 2918.40 493.305   3 
   1  -7 -16 3442.07 291.458   2 
   1   7  16 2733.51 318.613   2 
  -1  -7  16 3246.92 568.936   2 
  -1   7  16 2848.02 268.938   2 
  -1  -7 -16 2945.87 472.717   3 
   1  -7 -17 52.6014 287.247   3 
  -1  -7 -17 29.3384 170.117   1 
   1   7  17-77.8639 113.054   2 
  -1  -7 -17-229.195 223.632   3 
  -1  -7  17 324.975 298.368   2 
   1  -7  17 259.032 287.917   2 
   1  -7  18 909.633 377.352   2 
  -1  -7 -18 1201.77 407.902   3 
   1  -7 -18 939.841 399.039   3 
  -1  -7 -18 655.719 216.531   1 
   1   7  18 957.563 238.201   2 
   1  -7 -18 692.086 170.187   1 
  -1  -7  18 1169.68 403.001   2 
  -1  -7  19 10525.1 908.514   2 
  -1  -7 -19 10952.5 878.898   3 
   1  -7 -19 10987.6 538.105   1 
   1  -7 -19 9814.35 832.849   3 
  -1  -7 -19 10814.4 683.885   1 
   1   7  19 10583.0 617.020   2 
   1  -7  19 10222.1 891.921   2 
  -1  -7 -20 1152.97 450.808   3 
   1  -7 -20 655.630 168.622   1 
  -1  -7 -20 608.333 214.959   1 
   1   7  20 628.810 216.494   2 
   1  -7 -20 1175.10 465.028   3 
  -1  -7  20 1154.45 414.377   2 
   1  -7  20 1489.77 483.056   2 
   1   7 -21 6423.14 233.634   3 
  -1  -7 -21 8539.58 623.908   1 
   1  -7  21 7684.29 801.068   2 
  -1  -7  21 7212.58 774.498   2 
   1   7  21 7847.48 528.536   2 
   1  -7 -21 7733.49 790.529   3 
   1  -7 -21 7849.45 424.282   1 
  -1  -7 -21 7763.77 817.511   3 
   1   7 -22 390.403 79.9650   3 
   1  -7 -22 372.362 120.383   1 
  -1  -7 -22 477.680 304.896   3 
   1  -7 -22 211.177 354.894   3 
   1  -7  22 1070.80 403.202   2 
   1   7  22 361.085 172.042   2 
  -1  -7 -22 123.956 166.019   1 
  -1  -7  22 815.632 365.758   2 
   1  -7  23 2282.18 493.772   2 
  -1  -7  23 2339.94 458.892   2 
   1   7  23 2354.16 288.527   2 
   1  -7 -23 2232.41 489.455   3 
   1  -7 -23 2228.48 206.950   1 
  -1  -7 -23 1629.23 409.610   3 
  -1  -7 -23 2451.33 351.064   1 
   1   7 -23 2283.53 166.800   3 
  -1  -7  24-373.000 349.233   2 
  -1  -7 -24 22.8961 156.157   1 
   1  -7 -24-219.542 296.224   3 
   1  -7  24-88.4483 237.820   2 
  -1  -7 -24-250.163 272.627   3 
  -1  -7 -25 989.862 431.180   3 
  -1  -7  25 472.840 379.693   2 
   1  -7 -25 613.475 428.791   3 
   1  -7  25 519.371 370.022   2 
  -1  -7 -25 359.101 136.140   1 
   1  -7  26 8140.93 868.577   2 
   1  -7 -26 8139.78 863.249   3 
  -1  -7 -26 8931.00 605.007   1 
  -1  -7 -26 8563.52 929.195   3 
  -1  -7  26 8295.37 882.983   2 
   1  -7 -27 1512.91 551.169   3 
  -1  -7  27 2691.22 604.080   2 
   1  -7  27 2265.99 574.594   2 
  -1  -7 -27 2176.58 641.187   3 
  -1  -7 -27 1342.35 278.285   1 
  -1  -7  28 7811.81 868.862   2 
   1  -7 -28 8775.14 951.155   3 
  -1  -7 -28 8861.35 953.074   3 
   1  -7  28 7804.31 886.724   2 
  -1  -7  29 2594.23 561.565   2 
  -1  -7 -29 2584.99 572.166   3 
   1  -7  29 2799.20 612.185   2 
   1  -7 -29 2398.95 562.594   3 
   1  -7  30 1108.96 411.538   2 
   1  -7 -30 1818.56 572.567   3 
  -1  -7  30 1549.84 467.267   2 
  -1  -7 -30 250.144 320.519   3 
   1  -7 -31-16.1463 311.257   3 
   1  -7  31 136.488 282.249   2 
  -1  -7 -31 706.626 413.149   3 
  -1  -7  31-24.4253 283.683   2 
   1  -7  32 505.319 347.301   2 
  -1  -7  32-84.9641 304.496   2 
  -1  -7 -32 556.761 406.567   3 
   1  -7 -32-17.6892 337.523   3 
  -1  -7 -33 1.45967 334.688   3 
   1  -7  33 450.538 296.500   2 
   1  -7 -33-359.187 381.102   3 
  -1  -7  33-74.7242 292.931   2 
  -1  -7  34-167.861 329.035   2 
   1  -7  34 661.327 407.737   2 
   1  -7 -34-282.715 382.235   3 
  -1  -7 -34-343.235 445.776   3 
   1  -7 -35 1773.15 498.828   3 
  -1  -7 -35 2109.43 556.254   3 
  -1  -7  35 1349.20 469.677   2 
   1  -7  35 1897.55 555.880   2 
  -1  -7 -36 2393.20 628.525   3 
   1  -7 -36 1229.68 433.286   3 
   1  -7  36 1882.69 573.340   2 
  -1  -7  36 2464.93 577.864   2 
   1  -7  37 464.298 361.445   2 
  -1  -7 -37 327.719 335.367   3 
  -1  -7  37-112.424 367.195   2 
   1  -7 -37 256.262 380.466   3 
  -1  -7  38-178.578 289.166   2 
   1  -7  38 544.741 365.011   2 
   1  -7  39 206.024 348.376   2 
  -1  -7  39 656.626 362.936   2 
   1  -7  40 659.882 437.641   2 
  -1  -7  40-476.849 345.672   2 
  -1  -7  41 616.761 415.888   2 
   1  -7  41 1104.49 525.803   2 
   1  -7  42 620.065 403.021   2 
   1  -8   0-70.3839 144.041   3 
   1  -8   0 357.900 293.654   2 
  -1   8   0-36.7176 133.358   3 
  -1  -8   0-161.260 260.515   2 
   1   8   0-53.1882 138.347   3 
  -1  -8   1 3061.33 473.468   2 
   1  -8  -1 3804.80 544.293   2 
   1  -8  -1 2118.91 273.588   3 
  -1  -8  -1 2265.15 409.961   2 
  -1   8  -1 2265.83 272.950   3 
   1  -8   1 3315.80 494.797   2 
   1   8  -1 2736.66 321.590   3 
   1   8   1 2745.70 339.537   3 
  -1  -8  -1 2345.00 337.356   3 
  -1   8   1 2457.66 305.505   3 
   1  -8   1 2219.53 255.931   3 
   1   8  -2 13669.6 651.114   3 
   1  -8  -2 13407.3 701.468   3 
  -1  -8  -2 13479.8 875.389   2 
   1  -8  -2 15074.9 937.246   2 
   1   8   2 13906.1 746.733   3 
  -1  -8  -2 12308.5 697.737   3 
  -1   8   2 12941.5 821.077   2 
  -1   8   2 13804.6 710.579   3 
  -1  -8   2 12829.4 887.277   2 
   1  -8   2 13856.9 906.546   2 
   1  -8   2 12376.2 581.867   3 
  -1  -8  -3 8973.87 641.800   3 
   1  -8  -3 10330.4 758.645   2 
   1   8  -3 10903.4 582.731   3 
  -1  -8  -3 9077.24 729.587   2 
   1  -8   3 9926.54 815.495   2 
   1   8   3 10261.7 688.225   3 
  -1   8   3 10753.7 750.205   2 
   1  -8   3 8929.06 474.516   3 
  -1   8   3 9170.63 629.258   3 
  -1  -8   3 9254.37 819.921   2 
   1  -8  -3 8640.72 615.828   3 
   1   8   4 65884.6 1698.77   3 
   1  -8   4 63514.1 1946.97   2 
   1  -8  -4 62950.5 1732.10   2 
   1   8  -4 61668.5 1258.64   3 
  -1  -8   4 64299.6 1978.28   2 
  -1  -8  -4 63736.1 1842.34   2 
  -1   8   4 62904.4 1618.59   3 
  -1  -8  -4 61445.2 1573.32   3 
   1  -8   4 62022.0 1113.15   3 
   1  -8  -4 60931.5 1542.93   3 
  -1   8   4 62480.3 1732.52   2 
   1  -8   5 9102.71 857.788   2 
   1  -8   5 7130.54 377.648   3 
  -1  -8  -5 7345.30 625.236   3 
  -1  -8   5 7799.39 786.781   2 
   1  -8  -5 8395.89 689.008   3 
  -1   8   5 8600.68 661.940   3 
   1  -8  -5 6447.15 548.569   2 
  -1   8   5 8034.65 652.754   2 
   1   8   5 8312.82 671.904   3 
  -1  -8  -5 7861.32 717.005   2 
   1   8  -5 8066.44 478.595   3 
   1  -8   6 30063.0 1386.56   2 
  -1  -8   6 30352.3 1401.95   2 
  -1   8   6 30794.1 1197.46   3 
   1  -8  -6 29955.2 1165.20   2 
  -1  -8  -6 30825.5 1280.88   2 
   1   8   6 31044.9 1281.61   2 
  -1  -8  -6 31069.0 1177.61   3 
   1  -8  -6 28821.7 1148.19   3 
   1   8  -6 30174.5 794.000   3 
   1   8   6 29618.2 1217.71   3 
   1  -8   6 28312.2 631.532   3 
  -1   8   6 31225.9 1195.08   2 
   1  -8   7 17772.0 1106.96   2 
   1  -8  -7 14706.5 790.535   2 
   1   8  -7 14512.5 535.765   3 
   1  -8  -7 15865.9 894.803   3 
   1   8   7 16552.1 931.575   3 
   1   8   7 15873.3 920.215   2 
  -1   8   7 16362.9 901.675   3 
  -1  -8  -7 16008.0 911.999   2 
  -1  -8  -7 15549.8 894.218   3 
  -1   8   7 14917.0 824.802   2 
  -1  -8   7 15261.9 1034.50   2 
   1   8   8 8868.54 687.204   2 
  -1  -8   8 8818.76 825.322   2 
  -1  -8  -8 9270.72 695.259   2 
  -1  -8  -8 7638.00 653.377   3 
   1  -8   8 9242.81 809.308   2 
   1  -8  -8 8589.17 680.278   3 
   1   8  -8 7905.57 370.197   3 
   1  -8  -8 8496.74 595.729   2 
  -1   8   8 9034.26 682.357   3 
  -1   8   8 8424.25 616.180   2 
  -1  -8  -9 4618.81 514.293   3 
  -1  -8  -9 4768.74 528.017   2 
  -1  -8   9 4833.04 612.252   2 
   1  -8  -9 4565.61 431.585   2 
   1   8  -9 4466.63 254.542   3 
   1  -8   9 5227.14 634.598   2 
  -1   8   9 4591.09 441.540   2 
   1  -8  -9 4282.87 492.299   3 
   1   8   9 4352.25 489.413   2 
  -1   8  10 231.391 154.489   2 
  -1  -8  10-188.118 258.588   2 
   1  -8 -10 43.4523 219.859   3 
   1   8  10-80.2235 136.525   2 
   1  -8  10 273.270 266.243   2 
  -1  -8 -10 295.255 209.410   2 
   1   8 -10 53.4567 53.9103   3 
   1  -8 -10-32.6329 171.577   2 
  -1  -8 -10 40.4903 224.068   3 
  -1  -8 -11 964.475 244.651   2 
   1   8  11 1474.99 323.456   2 
  -1  -8 -11 1587.18 395.151   3 
   1  -8  11 1627.65 458.035   2 
   1  -8 -11 2113.12 416.818   3 
  -1  -8  11 1441.21 398.225   2 
   1  -8 -11 1262.53 255.181   2 
  -1   8  11 1340.02 248.672   2 
  -1  -8  12 13828.5 1005.58   2 
  -1  -8 -12 13507.4 897.502   3 
   1  -8 -12 13440.3 886.993   3 
  -1  -8 -12 15034.2 857.939   2 
  -1   8  12 14736.5 732.671   2 
   1  -8 -12 14248.3 743.053   2 
   1   8  12 13571.3 809.405   2 
   1  -8  12 14178.5 1009.81   2 
   1   8  13 1098.52 284.920   2 
   1  -8 -13 1900.41 451.267   3 
  -1   8  13 1541.42 273.959   2 
   1  -8 -13 1254.56 256.072   2 
   1  -8  13 1958.96 492.273   2 
  -1  -8 -13 1631.96 434.437   3 
  -1  -8  13 1172.85 451.831   2 
  -1  -8 -13 1402.03 323.383   2 
   1   8  14 9543.30 662.544   2 
  -1  -8 -14 10266.3 694.485   2 
   1  -8 -14 10251.2 591.968   2 
   1  -8 -14 9778.25 818.950   3 
  -1   8  14 10178.9 582.766   2 
   1  -8  14 8898.92 829.591   2 
  -1  -8  14 9053.48 850.234   2 
  -1  -8 -14 9466.18 786.536   3 
  -1  -8 -15 1254.38 274.185   2 
   1   8  15 1318.57 278.878   2 
  -1  -8  15 903.970 414.361   2 
   1  -8  15 1269.92 399.086   2 
   1  -8 -15 1423.53 388.788   3 
   1  -8 -15 1408.57 258.380   2 
  -1   8  15 1331.51 238.646   2 
  -1  -8 -15 1524.97 431.633   3 
  -1   8  16 1504.18 223.498   2 
   1  -8  16 1358.22 432.480   2 
   1  -8 -16 1600.66 246.020   2 
  -1  -8  16 1812.65 443.074   2 
  -1  -8 -16 1593.21 322.096   1 
  -1  -8 -16 2027.06 447.082   3 
   1  -8 -16 1259.93 379.384   3 
   1   8  16 1536.98 271.692   2 
   1   8  17 3779.61 420.566   2 
   1  -8  17 3954.68 626.229   2 
  -1  -8  17 3830.41 609.609   2 
  -1  -8 -17 4286.41 617.779   3 
   1  -8 -17 4378.76 376.997   2 
  -1  -8 -17 3858.32 457.936   1 
   1  -8 -17 3574.99 569.425   3 
  -1  -8 -18 7009.58 728.356   3 
   1   8  18 6717.40 543.950   2 
  -1  -8 -18 6624.44 599.856   1 
  -1  -8  18 6385.04 756.095   2 
   1  -8 -18 6292.79 724.662   3 
   1  -8  18 6733.31 787.244   2 
  -1  -8 -19 303.576 162.984   1 
   1  -8  19 1019.63 374.319   2 
   1   8  19 616.100 200.202   2 
   1  -8 -19 650.432 389.564   3 
  -1  -8  19 1048.75 422.091   2 
  -1  -8 -19 828.755 362.542   3 
   1  -8 -19 438.932 165.848   1 
   1  -8 -20 78.8334 116.486   1 
   1  -8  20 653.225 344.065   2 
  -1  -8 -20 156.655 306.974   3 
  -1  -8  20 202.364 308.064   2 
  -1  -8 -20 0.18684 181.460   1 
   1  -8 -20 31.4342 311.044   3 
   1   8  20 237.005 168.436   2 
  -1  -8  21 247.375 282.388   2 
   1  -8 -21-165.440 342.803   3 
   1   8  21 297.131 164.038   2 
  -1  -8 -21 367.955 214.936   1 
   1  -8 -21 417.942 166.291   1 
  -1  -8 -21-444.876 332.841   3 
   1  -8  21 113.608 251.891   2 
  -1  -8 -22 579.653 230.253   1 
   1  -8  22 99.3300 292.690   2 
  -1  -8  22 260.731 288.678   2 
   1  -8 -22 320.416 133.196   1 
  -1  -8 -22 247.303 293.059   3 
   1  -8 -22 26.7639 257.886   3 
  -1  -8 -23 1476.62 303.736   1 
  -1  -8  23 1483.51 456.799   2 
   1  -8 -23 767.915 268.739   3 
  -1  -8 -23 1164.92 409.182   3 
   1  -8  23 1405.71 447.185   2 
  -1  -8 -24 620.578 250.639   1 
  -1  -8  24 18.5733 308.539   2 
   1  -8 -24-176.197 372.746   3 
  -1  -8 -24-113.613 322.956   3 
   1  -8  24 168.245 324.954   2 
  -1  -8 -25 228.870 371.244   3 
   1  -8  25 623.640 371.319   2 
  -1  -8  25 428.781 425.551   2 
   1  -8 -25-187.677 302.595   3 
  -1  -8 -25 206.160 182.623   1 
  -1  -8  26 9160.28 968.283   2 
   1  -8 -26 9433.89 953.492   3 
  -1  -8 -26 10720.9 1011.13   3 
   1  -8  26 10079.2 1022.37   2 
   1  -8 -27 2010.50 608.797   3 
  -1  -8  27 2325.60 581.344   2 
  -1  -8 -27 2134.75 608.770   3 
   1  -8  27 2377.49 633.769   2 
   1  -8  28 12831.5 1171.16   2 
   1  -8 -28 12948.9 1161.19   3 
  -1  -8  28 13619.1 1191.57   2 
  -1  -8 -28 12644.6 1175.14   3 
   1  -8 -29 481.870 406.293   3 
  -1  -8 -29 672.840 519.608   3 
  -1  -8  29 1511.59 537.392   2 
   1  -8  29 1402.26 543.458   2 
   1  -8 -30 2103.11 482.192   3 
   1  -8  30 1851.96 530.665   2 
  -1  -8  30 1721.13 480.347   2 
  -1  -8 -30 2422.14 590.141   3 
  -1  -8 -31 727.546 415.933   3 
  -1  -8  31 605.188 397.452   2 
   1  -8  31 626.806 375.038   2 
   1  -8 -31 874.558 444.485   3 
   1  -8  32 2839.69 648.596   2 
   1  -8 -32 1915.38 516.365   3 
  -1  -8  32 2755.71 603.334   2 
  -1  -8 -32 2186.52 577.802   3 
   1  -8  33 648.436 405.317   2 
  -1  -8  33 182.691 304.271   2 
  -1  -8 -33-390.295 465.587   3 
   1  -8 -33 15.6613 365.599   3 
  -1  -8  34 412.169 395.570   2 
  -1  -8 -34-579.072 475.482   3 
   1  -8 -34 77.2176 290.879   3 
   1  -8  34 40.5334 351.638   2 
   1  -8  35 89.5143 332.435   2 
  -1  -8  35 935.953 464.400   2 
   1  -8 -35 424.785 398.688   3 
  -1  -8 -35 1114.29 446.589   3 
  -1  -8  36 5348.90 828.973   2 
   1  -8  36 5840.45 899.089   2 
   1  -8  37 821.006 432.646   2 
  -1  -8  37 199.628 375.536   2 
   1  -8  38-141.736 315.160   2 
  -1  -8  38 562.695 372.541   2 
   1  -8  39 1361.70 545.922   2 
  -1  -8  39 1231.92 554.837   2 
  -1  -8  40-95.6376 362.903   2 
  -1  -9   0 161.517 244.250   2 
   1  -9   0 67.9288 132.841   3 
  -1   9   0 152.843 163.364   3 
   1   9   0 103.518 129.753   3 
  -1  -9   1 734.775 305.257   2 
   1  -9   1 1424.07 398.759   2 
   1  -9  -1 885.269 204.495   3 
   1  -9  -1 1534.06 429.197   2 
   1  -9   1 670.386 192.639   3 
   1   9   1 610.867 187.696   3 
  -1  -9  -1 689.768 314.465   2 
  -1   9  -1 958.152 211.667   3 
   1   9  -1 716.107 191.903   3 
  -1   9   1 967.857 247.425   3 
  -1  -9  -2 1285.57 297.076   3 
   1  -9   2 1609.84 394.820   2 
  -1  -9  -2 1459.36 384.376   2 
   1   9   2 1146.17 255.916   3 
   1  -9   2 1294.73 209.838   3 
   1  -9  -2 1194.44 253.164   3 
   1   9  -2 1181.86 234.617   3 
  -1   9   2 1194.72 257.366   3 
   1  -9  -2 1148.17 367.201   2 
  -1  -9   2 906.259 354.480   2 
   1   9   3 3738.37 435.483   3 
   1  -9  -3 3483.32 435.398   3 
   1  -9  -3 2662.76 410.467   2 
  -1  -9  -3 3418.35 436.793   3 
  -1  -9  -3 3345.53 552.260   2 
  -1  -9   3 3257.63 532.923   2 
   1  -9   3 3047.91 298.237   3 
  -1   9   3 3079.65 419.186   3 
   1  -9   3 4017.72 625.051   2 
   1   9  -3 3115.73 339.654   3 
  -1  -9  -4 32598.3 1211.70   3 
   1  -9   4 34861.8 1534.31   2 
   1  -9  -4 33246.5 1206.44   3 
   1  -9   4 32041.6 874.345   3 
   1   9  -4 32959.6 983.376   3 
  -1  -9  -4 35753.9 1480.68   2 
   1  -9  -4 34044.2 1381.59   2 
  -1  -9   4 34485.3 1556.34   2 
  -1   9   4 33969.1 1253.86   3 
   1   9   4 33712.9 1279.06   3 
   1  -9  -5 2394.57 396.236   2 
   1  -9   5 3019.85 574.776   2 
  -1  -9  -5 2956.12 479.756   3 
   1   9  -5 2703.74 302.483   3 
   1   9   5 2503.06 416.091   3 
  -1   9   5 2551.93 414.130   3 
   1  -9  -5 2612.93 423.175   3 
   1  -9   5 2665.40 262.514   3 
  -1  -9  -5 3882.67 586.504   2 
  -1  -9   5 3244.72 609.628   2 
  -1   9   6 5959.55 575.826   3 
  -1  -9   6 5763.63 684.372   2 
   1  -9  -6 5335.94 541.916   2 
   1  -9   6 5594.00 672.929   2 
   1   9  -6 5217.96 360.108   3 
  -1  -9  -6 6061.23 652.498   2 
  -1  -9  -6 6534.70 602.650   3 
   1  -9  -6 4972.90 507.262   3 
  -1  -9  -7 3909.80 533.569   2 
   1  -9   7 3846.17 605.961   2 
   1   9  -7 3556.08 282.962   3 
  -1  -9   7 4146.18 602.244   2 
   1  -9  -7 3518.76 427.239   3 
  -1  -9  -7 5637.66 584.637   3 
   1  -9  -7 3519.33 442.949   2 
   1  -9   8 830.357 434.650   2 
  -1  -9   8 246.978 315.686   2 
   1  -9  -8 421.870 293.401   3 
  -1  -9  -8 651.070 338.784   2 
   1  -9  -8-11.7915 188.496   2 
  -1   9   8 490.093 234.486   2 
   1   9  -8 190.518 97.1864   3 
  -1  -9   9 26575.1 1442.27   2 
   1  -9  -9 26151.5 1122.56   2 
   1  -9  -9 24600.9 1184.85   3 
  -1  -9  -9 26673.2 1229.05   2 
   1   9  -9 25239.8 613.627   3 
  -1   9   9 25781.9 1119.89   2 
   1  -9   9 27991.1 1442.48   2 
   1  -9  10 20595.8 1287.03   2 
  -1  -9  10 21550.3 1318.84   2 
   1  -9 -10 19425.6 1093.20   3 
   1   9 -10 18525.2 451.744   3 
  -1  -9 -10 21238.4 1097.42   2 
  -1   9  10 20409.2 972.808   2 
  -1  -9 -10 22353.1 1170.55   3 
   1  -9 -10 21725.8 1026.66   2 
  -1  -9  11 3466.84 620.918   2 
   1  -9  11 4541.31 678.668   2 
   1  -9 -11 3884.29 468.508   2 
   1  -9 -11 3935.61 569.595   3 
  -1  -9 -11 3645.30 500.575   2 
  -1   9  11 3681.81 437.819   2 
  -1  -9 -11 4022.34 575.263   3 
  -1  -9  12 381.512 306.180   2 
  -1  -9 -12 643.237 327.379   3 
   1  -9 -12 881.038 324.648   3 
   1  -9 -12 978.084 302.101   2 
   1  -9  12 781.469 390.495   2 
  -1  -9 -12 836.703 282.196   2 
  -1   9  12 1002.85 256.420   2 
  -1   9  13 364.462 205.349   2 
  -1  -9  13 519.382 367.877   2 
   1  -9  13 1040.52 455.280   2 
  -1  -9 -13 998.748 403.617   3 
  -1  -9 -13 167.161 246.771   2 
   1  -9 -13 157.151 225.986   3 
   1  -9 -13 1061.07 323.963   2 
   1  -9 -14 8363.91 601.998   2 
   1  -9  14 8111.00 853.471   2 
  -1  -9 -14 8416.84 688.104   2 
  -1  -9  14 7569.19 838.900   2 
   1  -9 -14 7733.06 735.480   3 
  -1  -9 -14 7312.01 732.051   3 
  -1   9  14 7754.14 562.734   2 
   1   9  14 7554.52 633.016   2 
   1  -9  15 1601.66 481.869   2 
  -1  -9  15 1517.97 497.870   2 
  -1   9  15 1348.29 257.016   2 
   1  -9 -15 1055.58 328.845   3 
   1  -9 -15 1252.95 259.511   2 
   1   9  15 1622.40 334.936   2 
  -1  -9 -15 1935.34 470.098   3 
  -1  -9 -15 1340.94 313.499   2 
   1   9  16 834.437 225.061   2 
  -1  -9  16 853.196 355.472   2 
  -1  -9 -16 766.171 350.811   3 
   1  -9 -16 1067.84 246.764   2 
  -1  -9 -16 1260.89 321.172   2 
   1  -9  16 691.665 325.580   2 
   1  -9 -16 1189.08 356.906   3 
  -1  -9 -17 573.612 342.645   3 
  -1  -9  17 116.288 265.730   2 
  -1  -9 -17 217.202 181.474   1 
   1  -9 -17 509.106 206.407   2 
   1  -9  17 498.231 379.997   2 
   1   9  17 244.768 138.356   2 
   1  -9 -17 285.870 295.483   3 
  -1  -9 -18 7248.79 814.222   3 
   1  -9 -18 6261.55 710.494   3 
   1  -9  18 6852.53 819.202   2 
   1  -9 -18 7440.96 496.527   2 
  -1  -9 -18 6974.46 659.194   1 
  -1  -9  18 6669.67 819.583   2 
   1   9  18 5973.60 553.163   2 
  -1  -9 -19 187.215 209.769   1 
   1  -9  19 116.866 306.463   2 
  -1  -9  19 206.029 344.895   2 
   1  -9 -19 445.210 344.626   3 
  -1  -9 -19 476.026 426.793   3 
  -1  -9  20 3572.33 635.099   2 
   1  -9  20 4858.85 711.288   2 
  -1  -9 -20 4707.98 528.642   1 
   1  -9 -20 4616.33 677.483   3 
  -1  -9 -20 4441.72 626.177   3 
   1  -9 -20 4828.71 448.876   1 
  -1  -9 -21 230.408 211.360   1 
   1  -9  21 249.147 286.841   2 
  -1  -9  21-683.514 372.092   2 
   1  -9 -21 323.870 396.416   3 
  -1  -9 -21-100.449 298.477   3 
   1  -9  22 1670.12 523.169   2 
   1  -9 -22 1089.58 413.411   3 
  -1  -9  22 766.669 422.359   2 
  -1  -9 -22 901.153 454.469   3 
  -1  -9 -22 1168.54 327.851   1 
  -1  -9 -23 7034.69 633.356   1 
   1  -9  23 5488.52 773.517   2 
  -1  -9  23 5974.39 793.742   2 
   1  -9 -23 6211.70 800.644   3 
  -1  -9 -23 5253.64 730.501   3 
   1  -9 -24 466.663 376.960   3 
   1  -9  24 870.041 466.085   2 
  -1  -9  24 704.926 452.015   2 
  -1  -9 -24 628.285 321.711   3 
   1  -9  25 854.199 416.161   2 
  -1  -9  25 990.728 471.202   2 
  -1  -9 -25 1130.48 455.445   3 
   1  -9 -25 792.862 345.112   3 
   1  -9 -26-37.1142 318.697   3 
   1  -9  26-176.234 306.810   2 
  -1  -9  26 556.997 401.712   2 
  -1  -9 -26 138.048 355.793   3 
  -1  -9 -27 709.946 455.776   3 
  -1  -9  27 752.700 408.530   2 
   1  -9  27 1695.07 502.842   2 
   1  -9 -27 464.107 406.782   3 
  -1  -9  28 7905.03 967.859   2 
   1  -9  28 7281.98 952.772   2 
  -1  -9 -28 7609.52 922.753   3 
   1  -9 -28 7955.13 952.796   3 
   1  -9  29 823.120 479.032   2 
  -1  -9  29 228.307 276.808   2 
   1  -9 -29 209.658 433.624   3 
  -1  -9 -29 338.392 347.464   3 
  -1  -9 -30-294.101 269.037   3 
   1  -9 -30 276.311 360.482   3 
  -1  -9  30 295.499 373.670   2 
   1  -9  30 379.152 349.367   2 
  -1  -9 -31 305.075 418.768   3 
   1  -9  31 566.290 392.195   2 
  -1  -9  31 340.991 317.673   2 
   1  -9 -31 101.202 383.277   3 
  -1  -9  32-510.252 367.366   2 
   1  -9 -32-95.8946 295.380   3 
  -1  -9 -32 484.502 440.760   3 
   1  -9  32-17.8865 354.936   2 
  -1  -9 -33 918.238 464.822   3 
   1  -9 -33 1858.97 570.507   3 
   1  -9  33 1434.94 495.185   2 
  -1  -9  33 1152.67 485.324   2 
  -1  -9  34 92.2653 332.999   2 
   1  -9  34 1105.04 494.128   2 
   1  -9  35 304.253 386.472   2 
  -1  -9  35-325.601 387.247   2 
  -1  -9  36 367.331 402.685   2 
   1 -10   0 272.486 330.563   2 
   1 -10   0 150.918 201.538   3 
   1  10   0 631.788 284.355   3 
  -1  10   0 364.696 182.902   3 
  -1 -10   0 537.867 362.219   2 
  -1  10   1 26203.4 1063.47   3 
   1 -10  -1 26192.8 1023.92   3 
  -1 -10  -1 28496.3 1426.95   2 
   1 -10  -1 28635.3 1390.39   2 
   1  10   1 27692.2 1126.20   3 
  -1 -10   1 28926.3 1473.47   2 
   1 -10   1 28457.8 1416.07   2 
   1  10  -1 26783.2 1037.03   3 
   1 -10   1 26267.2 963.888   3 
  -1  10   2 2655.17 369.365   3 
  -1 -10   2 2928.56 533.492   2 
   1 -10   2 2935.73 570.313   2 
   1 -10  -2 2418.06 430.698   2 
   1 -10  -2 3019.20 384.055   3 
   1 -10   2 2444.51 319.566   3 
   1  10   2 3239.80 426.409   3 
  -1 -10  -2 2369.04 449.670   2 
   1  10  -2 2791.72 350.416   3 
   1 -10  -3 2287.03 390.837   2 
  -1  10   3 2355.63 351.164   3 
   1 -10  -3 2681.63 367.589   3 
   1  10  -3 2696.95 322.242   3 
   1 -10   3 3160.15 530.400   2 
   1 -10   3 2719.59 295.295   3 
  -1 -10  -3 2766.55 504.731   2 
  -1 -10  -3 2667.49 389.544   3 
   1  10   3 3001.42 393.000   3 
  -1 -10   3 2806.77 519.396   2 
   1 -10   4 2708.21 522.937   2 
  -1 -10  -4 2459.25 410.162   3 
   1 -10  -4 2395.84 353.561   3 
  -1 -10   4 2893.59 504.666   2 
  -1 -10  -4 2649.15 472.100   2 
   1 -10  -4 2219.21 374.781   2 
   1 -10   4 2817.64 286.574   3 
  -1  10   4 2066.86 334.285   3 
   1  10  -4 2435.65 294.363   3 
  -1 -10  -5 496.114 319.553   2 
   1 -10   5 298.331 138.437   3 
  -1 -10  -5 417.463 220.841   3 
   1 -10  -5-8.93880 227.313   3 
   1 -10  -5 46.9943 275.342   2 
   1  10  -5-71.4616 139.313   3 
  -1 -10   5 278.075 284.099   2 
   1 -10   5-147.309 242.965   2 
  -1 -10  -6 1685.32 341.200   3 
   1 -10   6 1887.26 422.871   2 
  -1 -10  -6 2573.17 473.831   2 
  -1 -10   6 1558.44 348.151   2 
   1 -10  -6 2083.18 371.334   2 
   1  10  -6 1891.13 229.394   3 
   1 -10  -6 1688.15 314.075   3 
  -1 -10  -7 2431.32 448.449   2 
   1 -10   7 2704.56 542.518   2 
  -1 -10   7 2530.54 516.174   2 
   1 -10  -7 1833.15 365.883   2 
  -1 -10  -7 1843.70 359.966   3 
   1 -10  -7 2120.69 377.132   3 
   1 -10  -8 2006.39 393.571   2 
  -1 -10  -8 2378.79 438.195   3 
  -1 -10   8 2673.86 545.985   2 
   1 -10  -8 2419.50 438.711   3 
   1 -10   8 2558.30 559.221   2 
  -1 -10  -8 2259.48 436.753   2 
   1 -10   9 16396.4 1195.12   2 
  -1 -10  -9 14642.7 994.057   2 
   1 -10  -9 14440.7 949.354   3 
  -1 -10  -9 16487.9 1030.05   3 
  -1 -10   9 14605.9 1131.61   2 
   1 -10  -9 16720.0 978.604   2 
  -1 -10  10 12478.9 1086.23   2 
  -1 -10 -10 12065.6 911.809   2 
   1 -10 -10 12540.0 849.348   2 
  -1 -10 -10 11907.6 898.621   3 
   1 -10 -10 12067.2 925.775   3 
   1 -10  10 11485.6 1043.10   2 
   1 -10 -11 19099.4 1121.46   3 
   1 -10 -11 19297.2 1055.34   2 
  -1 -10 -11 17410.1 1097.73   3 
  -1 -10 -11 19450.3 1107.59   2 
  -1 -10  11 18052.1 1277.29   2 
   1 -10  11 18606.1 1280.98   2 
  -1 -10 -12 1696.02 517.039   3 
  -1 -10 -12 1166.51 340.555   2 
   1 -10 -12 1376.17 445.071   3 
   1 -10 -12 2319.73 436.726   2 
   1 -10  12 1678.54 521.932   2 
  -1 -10  12 2346.08 638.751   2 
  -1 -10  13 7620.09 853.295   2 
   1 -10 -13 8106.20 757.667   3 
  -1 -10 -13 7980.24 819.171   3 
  -1 -10 -13 7778.70 712.637   2 
   1 -10 -13 8189.36 680.414   2 
  -1  10  13 7159.74 597.041   2 
   1 -10  13 7280.69 854.918   2 
   1 -10 -14 199.286 218.327   2 
  -1 -10 -14 353.034 239.290   2 
   1 -10  14 752.841 376.393   2 
  -1 -10  14 1000.26 463.741   2 
   1 -10 -14 542.620 275.059   3 
   1 -10 -15 8976.66 667.489   2 
  -1 -10  15 8748.29 948.742   2 
  -1 -10 -15 9078.42 746.934   2 
  -1 -10 -15 7061.41 760.439   3 
   1 -10 -15 7040.16 731.680   3 
   1 -10  15 8260.90 897.721   2 
  -1 -10 -16 4935.97 547.380   2 
  -1 -10  16 4666.49 706.152   2 
   1 -10 -16 5075.07 501.531   2 
   1 -10  16 5104.00 766.015   2 
  -1 -10 -16 4655.72 646.668   3 
   1 -10 -16 4120.93 630.688   3 
  -1 -10  17 173.393 312.192   2 
  -1 -10 -17 766.125 306.756   2 
   1 -10  17 37.7815 309.299   2 
   1 -10 -17 406.036 310.170   3 
  -1 -10 -17 431.017 267.247   3 
   1 -10 -17 701.520 238.003   2 
   1 -10  18 228.655 349.949   2 
  -1 -10  18-205.183 368.325   2 
  -1 -10 -18-131.660 214.680   1 
   1 -10 -18-158.803 315.181   3 
  -1 -10 -18 123.094 320.435   3 
  -1 -10 -19 1049.12 392.973   3 
  -1 -10 -19 1567.45 369.900   1 
  -1 -10  19 822.961 381.544   2 
   1 -10 -19 1191.35 386.826   3 
   1 -10  19 1089.11 449.055   2 
  -1 -10 -20 1082.10 294.352   1 
  -1 -10 -20 1447.42 454.478   3 
  -1 -10  20 1286.72 492.250   2 
   1 -10  20 1715.79 539.108   2 
   1 -10 -20 619.551 360.760   3 
   1 -10 -21 2083.95 502.970   3 
   1 -10  21 2133.75 550.376   2 
  -1 -10 -21 2262.53 440.762   1 
  -1 -10  21 1788.94 508.370   2 
  -1 -10 -21 2231.27 522.343   3 
  -1 -10 -22 2114.48 407.360   1 
  -1 -10  22 1953.03 542.584   2 
   1 -10 -22 2066.44 497.788   3 
  -1 -10 -22 2665.99 582.098   3 
   1 -10  22 2579.88 657.725   2 
   1 -10  23 4475.44 780.620   2 
   1 -10 -23 3464.11 623.108   3 
  -1 -10  23 4034.30 701.790   2 
  -1 -10 -23 3264.14 587.311   3 
  -1 -10 -24 722.816 385.180   3 
   1 -10  24-171.935 343.016   2 
  -1 -10  24 317.105 305.715   2 
   1 -10 -24 408.236 415.064   3 
   1 -10  25 2661.40 605.071   2 
  -1 -10  25 2754.80 639.847   2 
   1 -10 -25 3602.59 631.613   3 
  -1 -10 -25 2875.98 609.852   3 
   1 -10  26 200.393 288.590   2 
  -1 -10  26 792.363 455.846   2 
   1 -10 -26 354.578 366.853   3 
  -1 -10 -26-76.9472 292.538   3 
  -1 -10 -27 152.329 303.381   3 
   1 -10  27-681.909 431.216   2 
  -1 -10  27-0.22817 340.734   2 
   1 -10 -27-134.122 342.670   3 
  -1 -10 -28 222.147 426.555   3 
   1 -10  28-475.488 399.746   2 
  -1 -10  28 323.412 378.765   2 
   1 -10 -28 264.734 366.009   3 
   1 -10  29 140.392 334.177   2 
  -1 -10 -29 542.239 516.498   3 
  -1 -10  29-97.0823 395.662   2 
   1 -10 -29 697.892 456.684   3 
   1 -10  30 1325.95 547.781   2 
  -1 -10  30 1670.78 547.106   2 
  -1 -10 -30 1617.99 560.720   3 
   1 -10 -30 1507.67 483.054   3 
  -1 -10 -31 343.030 325.421   3 
   1 -10 -31-36.2992 342.943   3 
  -1 -10  31 403.873 443.002   2 
   1 -10  31-100.157 373.979   2 
   1 -10  32 484.666 467.921   2 
  -1 -10  32 830.777 529.650   2 
  -1 -10  33 4426.03 842.378   2 
   1 -11   0-19.8902 312.285   2 
   1 -11   0 74.2264 151.688   3 
  -1 -11   0-24.8395 255.166   2 
   1 -11  -1 80.9336 172.734   3 
  -1 -11   1 81.2826 266.892   2 
  -1 -11  -1-35.8764 300.101   2 
   1 -11   1 46.1049 257.253   2 
   1 -11   1 146.683 201.941   3 
   1 -11  -1 136.437 272.575   2 
   1 -11  -2 1646.02 366.775   2 
   1 -11   2 1871.91 447.319   2 
  -1 -11   2 1483.06 455.718   2 
   1 -11   2 1742.59 289.371   3 
   1 -11  -2 1995.51 354.429   3 
  -1 -11  -2 1359.92 388.873   2 
   1 -11  -3 955.479 315.277   2 
   1 -11  -3 534.488 168.356   3 
   1 -11   3 1114.22 229.640   3 
   1 -11   3 994.159 328.838   2 
  -1 -11   3 1145.73 435.422   2 
  -1 -11  -3 1698.68 471.751   2 
   1 -11  -4 54.7930 199.626   3 
   1 -11   4 612.744 358.582   2 
   1 -11  -4 8.56122 220.172   2 
  -1 -11  -4 473.031 354.388   2 
  -1 -11  -4 248.998 226.332   3 
  -1 -11   4 731.676 401.592   2 
  -1 -11  -5 3832.29 614.284   2 
   1 -11  -5 3761.22 474.102   3 
   1 -11   5 3905.67 646.910   2 
  -1 -11  -5 3390.79 489.821   3 
  -1 -11   5 3643.40 637.154   2 
   1 -11  -5 3846.84 570.549   2 
   1 -11  -6 4629.58 529.459   3 
  -1 -11  -6 4745.48 571.205   3 
   1 -11  -6 6350.47 683.971   2 
   1 -11   6 5259.57 712.268   2 
  -1 -11   6 5688.79 743.729   2 
  -1 -11  -6 5917.85 727.760   2 
   1 -11   7 4507.68 718.918   2 
   1 -11  -7 4763.51 594.938   2 
   1 -11  -7 3516.49 480.366   3 
  -1 -11   7 4080.15 691.221   2 
  -1 -11  -7 4484.07 577.625   3 
  -1 -11  -7 4086.08 632.279   2 
  -1 -11  -8 6505.64 675.969   3 
  -1 -11  -8 6868.37 737.569   2 
   1 -11   8 6013.16 767.970   2 
   1 -11  -8 7577.10 744.499   2 
   1 -11  -8 6759.35 649.960   3 
  -1 -11   8 7144.29 862.097   2 
  -1 -11   9 1229.77 425.784   2 
   1 -11  -9 1133.07 372.529   3 
   1 -11   9 1001.76 458.928   2 
   1 -11  -9 1351.88 405.911   2 
  -1 -11  -9 882.164 353.345   2 
  -1 -11  -9 1431.50 360.849   3 
  -1 -11 -10 1142.82 337.820   2 
  -1 -11  10 1670.27 496.248   2 
   1 -11  10 2003.12 515.465   2 
   1 -11 -10 1276.21 337.354   3 
  -1 -11 -10 1871.57 402.574   3 
   1 -11 -10 2862.03 555.641   2 
  -1 -11  11 729.511 400.737   2 
   1 -11  11 1030.68 416.900   2 
  -1 -11 -11 831.200 272.618   2 
   1 -11 -11 1534.13 431.533   2 
   1 -11 -11 866.640 309.841   3 
  -1 -11 -11 880.994 350.850   3 
   1 -11 -12 4656.81 583.588   2 
  -1 -11  12 3373.34 601.930   2 
   1 -11  12 4022.08 687.831   2 
  -1 -11 -12 4050.28 558.404   2 
  -1 -11 -12 3539.65 544.234   3 
   1 -11 -12 3539.25 519.372   3 
  -1 -11  13 467.802 326.000   2 
   1 -11 -13-52.5509 232.423   3 
  -1 -11 -13 397.910 311.584   2 
   1 -11 -13-147.844 217.841   2 
  -1 -11 -13 62.8999 294.006   3 
   1 -11  13 551.696 417.860   2 
  -1 -11  14 2487.50 540.064   2 
   1 -11  14 3156.33 672.020   2 
  -1 -11 -14 3169.67 521.390   2 
   1 -11 -14 3086.26 530.028   3 
   1 -11 -14 3156.44 456.808   2 
  -1 -11 -14 2927.09 554.582   3 
  -1 -11 -15 835.386 300.956   2 
  -1 -11 -15 834.936 372.923   3 
   1 -11  15 279.000 382.179   2 
   1 -11 -15 798.146 292.096   2 
  -1 -11  15-172.432 336.383   2 
   1 -11 -15 947.008 362.998   3 
  -1 -11  16 3882.84 677.715   2 
   1 -11 -16 4063.95 618.252   3 
  -1 -11 -16 4334.14 685.895   3 
   1 -11  16 4737.74 746.759   2 
  -1 -11 -16 4121.96 571.778   2 
  -1 -11 -17 3446.15 624.349   3 
   1 -11 -17 2865.38 588.098   3 
  -1 -11  17 2875.31 595.466   2 
   1 -11  17 1802.09 524.500   2 
  -1 -11 -17 4118.10 546.575   2 
   1 -11  18-10.0989 295.626   2 
  -1 -11  18-664.044 436.484   2 
   1 -11 -18 83.0889 275.544   3 
  -1 -11 -18-39.7954 225.372   1 
  -1 -11 -18 240.299 291.089   3 
  -1 -11  19-295.819 393.255   2 
  -1 -11 -19-189.376 224.413   1 
   1 -11 -19-474.487 377.383   3 
   1 -11  19 311.612 362.814   2 
  -1 -11 -19-21.4363 324.517   3 
  -1 -11 -20 1225.02 451.357   3 
  -1 -11 -20 127.909 243.401   1 
  -1 -11  20 11.1677 328.150   2 
   1 -11 -20 343.403 334.857   3 
   1 -11  20 567.780 390.413   2 
   1 -11  21 1201.99 486.894   2 
   1 -11 -21 603.273 340.681   3 
  -1 -11 -21 1521.84 499.258   3 
  -1 -11  21 476.364 346.228   2 
   1 -11  22 4156.75 739.880   2 
   1 -11 -22 3440.95 595.756   3 
  -1 -11 -22 3701.28 659.913   3 
  -1 -11  22 3028.27 650.991   2 
   1 -11 -23 573.807 442.640   3 
   1 -11  23-227.031 326.808   2 
  -1 -11 -23 402.509 356.465   3 
  -1 -11  23 122.948 282.841   2 
  -1 -11  24 1337.49 487.336   2 
   1 -11  24 647.463 394.853   2 
  -1 -11 -24-7.04805 307.595   3 
   1 -11 -24 619.474 343.323   3 
   1 -11 -25 190.914 319.893   3 
   1 -11  25 474.274 418.451   2 
  -1 -11 -25 263.834 379.667   3 
  -1 -11  25-90.1196 282.679   2 
  -1 -11 -26 706.198 414.493   3 
   1 -11  26 342.903 374.509   2 
  -1 -11  26 258.274 284.269   2 
   1 -11 -26 895.045 435.312   3 
   1 -11 -27 200.009 364.583   3 
  -1 -11  27 398.595 382.762   2 
   1 -11  27 579.748 426.492   2 
  -1 -11 -27-168.938 278.908   3 
  -1 -11 -28 855.459 452.758   3 
  -1 -11  28 38.2481 393.932   2 
   1 -11 -28 1492.37 548.453   3 
   1 -11  28 687.080 425.237   2 
   1 -11 -29-197.921 328.777   3 
   1 -12   0 151.605 338.400   2 
  -1 -12   0 390.461 367.318   2 
   1 -12  -1 9951.13 932.078   2 
  -1 -12   1 10475.9 1018.88   2 
  -1 -12  -1 9703.20 960.051   2 
   1 -12   1 10604.8 957.079   2 
   1 -12  -1 10886.8 732.301   3 
   1 -12  -2 594.992 327.417   2 
  -1 -12   2 567.689 389.967   2 
   1 -12  -2 901.194 283.373   3 
   1 -12   2 221.003 268.195   2 
  -1 -12  -2 1063.83 496.518   2 
   1 -12   3 4074.55 640.273   2 
   1 -12  -3 4573.65 644.961   2 
  -1 -12   3 4385.70 698.855   2 
   1 -12  -3 4953.93 552.070   3 
  -1 -12  -3 4726.96 687.119   2 
  -1 -12   4 673.225 359.603   2 
   1 -12   4 971.885 314.353   2 
   1 -12  -4 1526.37 429.282   2 
   1 -12  -4 1249.97 322.107   3 
  -1 -12  -4 2037.93 501.825   2 
   1 -12   5-581.318 371.204   2 
   1 -12  -5 317.556 293.471   2 
  -1 -12  -5-263.672 287.398   2 
   1 -12  -5 193.492 216.784   3 
  -1 -12   5-119.891 325.322   2 
  -1 -12  -6 270.066 258.664   3 
   1 -12   6 59.1027 295.169   2 
   1 -12  -6 203.170 290.642   2 
  -1 -12   6-174.599 317.630   2 
  -1 -12  -6 283.183 282.408   2 
   1 -12  -6 92.2347 234.534   3 
   1 -12  -7 3837.36 597.679   2 
  -1 -12  -7 2394.35 454.502   3 
  -1 -12  -7 2744.22 509.058   2 
   1 -12  -7 2924.57 463.422   3 
  -1 -12   7 2661.63 577.209   2 
   1 -12   7 2685.53 522.781   2 
   1 -12  -8 2142.10 431.306   3 
  -1 -12   8 1911.03 521.082   2 
  -1 -12  -8 1674.20 430.893   3 
   1 -12   8 1507.83 501.346   2 
   1 -12  -8 2432.47 517.043   2 
  -1 -12  -8 1403.87 444.435   2 
  -1 -12   9 2929.07 584.755   2 
   1 -12   9 3002.70 600.216   2 
   1 -12  -9 4637.51 671.769   2 
  -1 -12  -9 3815.07 589.353   3 
  -1 -12  -9 2996.33 538.192   2 
   1 -12  -9 3101.58 510.738   3 
  -1 -12 -10 490.052 409.035   3 
   1 -12  10 669.503 391.228   2 
   1 -12 -10 767.029 439.640   2 
  -1 -12  10 151.218 298.316   2 
   1 -12 -10-112.465 242.777   3 
  -1 -12 -10 71.1790 243.717   2 
   1 -12 -11 553.732 261.486   3 
   1 -12  11 1188.92 516.063   2 
  -1 -12 -11 1196.61 552.052   3 
  -1 -12 -11 680.786 364.686   2 
   1 -12 -11 1139.93 445.789   2 
  -1 -12  11 750.120 424.018   2 
   1 -12  12 982.432 396.213   2 
  -1 -12  12 893.637 391.024   2 
  -1 -12 -12 544.946 297.757   2 
   1 -12 -12 1805.75 479.919   2 
   1 -12 -12 824.338 352.928   3 
  -1 -12 -12 1205.36 414.213   3 
   1 -12  13 4060.05 736.148   2 
   1 -12 -13 4120.91 618.344   3 
  -1 -12  13 3474.00 708.238   2 
  -1 -12 -13 4336.02 653.657   3 
  -1 -12 -13 5075.98 675.756   2 
   1 -12 -13 3545.79 513.818   2 
  -1 -12  14 2886.84 701.754   2 
   1 -12  14 2037.69 589.115   2 
   1 -12 -14 2290.10 470.331   3 
  -1 -12 -14 2443.89 501.922   2 
  -1 -12 -14 2566.18 559.377   3 
  -1 -12 -15 2295.43 523.572   3 
   1 -12  15 1353.34 394.700   2 
  -1 -12 -15 2174.05 465.761   2 
   1 -12 -15 1776.62 427.929   3 
  -1 -12  15 1861.76 537.774   2 
   1 -12  16 971.199 405.333   2 
   1 -12 -16 819.602 370.448   3 
  -1 -12  16 924.991 451.405   2 
  -1 -12 -16 1165.85 426.556   3 
  -1 -12 -16 918.273 307.253   2 
  -1 -12 -17 264.692 349.276   3 
   1 -12 -17 179.364 248.861   3 
   1 -12  17 206.557 316.870   2 
  -1 -12  17-468.781 390.993   2 
   1 -12 -18-198.975 333.100   3 
  -1 -12  18-651.715 492.243   2 
   1 -12  18 553.130 320.834   2 
  -1 -12 -18-25.8778 272.844   3 
   1 -12  19 357.014 397.038   2 
   1 -12 -19 953.537 336.755   3 
  -1 -12 -19 937.887 341.468   3 
  -1 -12  19 525.926 399.566   2 
  -1 -12  20 230.686 322.418   2 
   1 -12 -20 676.647 410.475   3 
  -1 -12 -20 914.756 422.046   3 
   1 -12  20 451.996 474.073   2 
  -1 -12  21 390.198 358.400   2 
   1 -12  21 1191.59 523.812   2 
   1 -12 -21 692.997 382.421   3 
  -1 -12 -21 1405.53 469.912   3 
   1 -12  22 563.964 450.281   2 
   1 -12 -22 29.8415 317.905   3 
  -1 -12 -22 487.651 414.696   3 
  -1 -12  22 299.759 340.868   2 
  -1 -12 -23 1876.00 538.375   3 
   1 -12  23 1910.43 621.552   2 
   1 -12 -23 1505.07 457.982   3 
  -1 -12  23 948.918 474.277   2 
  -1 -12 -24 354.805 442.319   3 
  -1 -12  24-540.122 363.511   2 
   1 -12 -24 89.8383 298.650   3 
  -1 -12 -25 1596.69 529.628   3 
   1 -12 -25 1091.82 439.920   3 
   1 -12 -26-194.653 318.502   3 
  -1 -12 -26 603.860 497.251   3 
   1 -13   0 13.1626 288.267   2 
  -1 -13   0 401.067 364.396   2 
  -1 -13  -1 640.858 364.018   2 
  -1 -13   1 763.585 443.436   2 
   1 -13  -1 660.466 319.895   2 
   1 -13   1 364.023 351.003   2 
   1 -13   2 133.342 338.133   2 
   1 -13  -2 134.196 304.416   2 
  -1 -13   2 565.001 394.121   2 
  -1 -13  -2 614.958 421.491   2 
   1 -13   3 248.873 320.906   2 
  -1 -13  -3 1313.38 471.855   2 
  -1 -13   3 1060.48 426.452   2 
   1 -13  -3 923.994 422.023   2 
   1 -13  -4 358.330 268.032   2 
   1 -13   4 709.833 397.083   2 
  -1 -13  -4 980.997 470.775   2 
  -1 -13   4-122.414 301.142   2 
  -1 -13   5 1700.55 522.396   2 
   1 -13   5 2341.69 570.601   2 
   1 -13  -5 3166.89 590.910   2 
  -1 -13  -5 2425.27 537.401   2 
  -1 -13  -6 203.538 321.941   2 
   1 -13  -6 606.145 391.245   2 
   1 -13   6 655.944 426.090   2 
  -1 -13   6-170.270 318.799   2 
   1 -13  -6 661.723 309.527   3 
  -1 -13   7 1777.09 530.438   2 
  -1 -13  -7 2017.40 511.964   2 
   1 -13  -7 2550.66 461.926   3 
   1 -13  -7 3135.73 586.573   2 
   1 -13   7 2368.88 605.414   2 
  -1 -13   8 3754.48 736.817   2 
  -1 -13  -8 3470.07 559.506   3 
   1 -13   8 2912.73 649.957   2 
   1 -13  -8 3505.98 542.900   3 
   1 -13  -8 4408.17 681.344   2 
  -1 -13  -8 3038.46 596.477   2 
   1 -13  -9 357.714 350.299   3 
   1 -13   9 635.421 454.665   2 
   1 -13  -9 1509.17 541.855   2 
  -1 -13  -9-22.9626 350.622   2 
  -1 -13  -9 1217.05 449.845   3 
  -1 -13   9 888.117 503.596   2 
   1 -13 -10 12363.6 1016.62   2 
  -1 -13  10 9687.23 1096.95   2 
  -1 -13 -10 11483.6 1038.08   2 
  -1 -13 -10 10322.0 901.540   3 
   1 -13  10 11526.7 1163.74   2 
   1 -13 -10 10031.5 912.110   3 
  -1 -13 -11 1973.61 511.189   3 
  -1 -13 -11 2606.74 545.268   2 
   1 -13 -11 2245.30 506.654   3 
   1 -13  11 1593.23 523.137   2 
  -1 -13  11 1837.77 571.912   2 
  -1 -13 -12 988.098 443.861   3 
   1 -13 -12 284.925 265.701   3 
   1 -13  12 748.946 510.999   2 
  -1 -13 -12 974.333 415.649   2 
  -1 -13  12 168.830 391.945   2 
   1 -13  13 177.289 415.875   2 
  -1 -13 -13 376.032 319.326   3 
   1 -13 -13 344.290 308.529   3 
  -1 -13 -13-93.7966 285.587   2 
  -1 -13  13 59.5623 419.540   2 
   1 -13 -14 1979.47 456.950   3 
   1 -13  14 1945.25 532.765   2 
  -1 -13 -14 2724.55 536.678   3 
  -1 -13  14 2170.16 598.829   2 
  -1 -13 -15 357.300 322.462   3 
   1 -13  15 569.969 342.182   2 
  -1 -13  15 263.238 336.112   2 
   1 -13 -15 683.048 372.868   3 
   1 -13 -16 78.2179 270.722   3 
  -1 -13  16-5.31592 369.488   2 
   1 -13  16 421.582 438.577   2 
  -1 -13 -16-58.1193 286.647   3 
  -1 -13  17-191.562 416.616   2 
   1 -13  17 68.1196 360.888   2 
  -1 -13 -17 263.700 320.278   3 
   1 -13 -17 660.125 362.244   3 
   1 -13  18 2346.51 617.921   2 
  -1 -13 -18 2212.74 535.053   3 
   1 -13 -18 2415.89 528.191   3 
  -1 -13  18 2053.70 636.883   2 
  -1 -13 -19 1025.95 458.901   3 
   1 -13 -19 399.451 379.558   3 
   1 -13 -20 905.488 414.448   3 
  -1 -13 -20 643.126 452.498   3 
  -1 -13 -21 823.282 444.899   3 
   1 -13 -21-98.7120 287.017   3 
  -1 -13 -22 896.171 422.175   3 
   1 -13 -22 992.359 433.886   3 
   1 -13 -23 440.633 373.953   3 
  -1 -13 -23 676.054 413.345   3 
   1 -13 -24 346.302 317.234   3 
  -1 -14   0 452.483 388.667   2 
   1 -14   0-219.445 373.674   2 
   1 -14   1 260.769 297.510   2 
   1 -14  -1 214.725 302.656   2 
  -1 -14  -1 675.106 436.353   2 
  -1 -14   1 508.410 390.686   2 
   1 -14   2 50.8159 271.929   2 
  -1 -14   2 1109.71 523.122   2 
  -1 -14  -2 848.719 434.985   2 
   1 -14  -2 576.052 399.949   2 
   1 -14   3 1668.75 538.137   2 
  -1 -14   3 82.6122 357.320   2 
   1 -14  -3 881.164 372.395   2 
  -1 -14  -3 1436.46 562.831   2 
   1 -14   4 6497.97 888.894   2 
   1 -14  -4 6137.03 817.910   2 
  -1 -14   4 5956.87 896.044   2 
  -1 -14  -4 6869.63 886.665   2 
   1 -14   5 970.666 463.237   2 
  -1 -14   5 1038.68 477.782   2 
   1 -14  -5 1359.18 491.177   2 
  -1 -14  -5 1359.40 465.955   2 
  -1 -14   6 1307.13 502.272   2 
   1 -14   6 2873.74 633.625   2 
   1 -14  -6 3486.61 652.777   2 
  -1 -14  -6 1566.50 525.881   2 
   1 -14  -7 1703.80 487.088   2 
  -1 -14   7 1359.65 514.565   2 
  -1 -14  -7 1799.64 499.020   2 
   1 -14   7 2358.07 611.327   2 
  -1 -14  -8-549.666 327.773   2 
  -1 -14   8-41.9861 368.548   2 
   1 -14  -8 899.000 447.146   2 
   1 -14   8 545.891 395.059   2 
  -1 -14  -9 111.675 303.750   2 
  -1 -14   9 55.2026 372.210   2 
   1 -14   9-3.80026 356.702   2 
   1 -14  10 695.987 429.271   2 
  -1 -14 -10 260.634 332.770   2 
  -1 -14  10 958.447 474.395   2 
  -1 -14  11 2116.39 574.769   2 
  -1 -14 -11 2312.17 531.291   2 
   1 -14  11 2943.28 687.907   2 
   1 -14  12-239.425 381.521   2 
  -1 -14  12 129.276 419.246   2 
  -1 -14 -12 370.768 322.280   3 
   1 -14 -13 1966.06 554.393   3 
   1 -14  13 1989.97 617.081   2 
  -1 -14 -13 1959.70 457.419   3 
  -1 -14 -14 2191.13 512.832   3 
   1 -14 -14 4661.74 768.059   3 
  -1 -14 -15 277.483 398.215   3 
   1 -14 -15 205.211 350.219   3 
   1 -14 -16 2897.64 620.439   3 
  -1 -14 -16 3684.29 661.003   3 
  -1 -14 -17 471.453 407.482   3 
   1 -14 -17 739.306 356.764   3 
   1 -14 -18 3671.24 679.338   3 
  -1 -14 -18 4116.66 698.780   3 
  -1 -14 -19 385.648 389.263   3 
   1 -14 -19 329.236 327.787   3 
  -1 -14 -20 856.051 438.353   3 
   1 -14 -20 627.824 414.468   3 
  -1 -14 -21 1862.78 555.788   3 
   1 -14 -21 1057.41 498.214   3 
   1 -15   0-28.0977 374.159   2 
  -1 -15   0 224.385 393.839   2 
   1 -15   1 17.7827 309.773   2 
   1 -15  -1 416.283 362.032   2 
  -1 -15   1 700.168 409.924   2 
  -1 -15  -1 519.664 420.895   2 
  -1 -15   2 428.819 358.362   2 
   1 -15   2-778.448 464.730   2 
   1 -15  -2 426.518 418.763   2 
  -1 -15  -2 725.108 436.436   2 
   1 -15  -3 1479.23 523.358   2 
   1 -15   3 364.147 329.371   2 
  -1 -15  -3 959.720 440.463   2 
  -1 -15   3 1183.31 547.139   2 
  -1 -15   4 530.223 389.069   2 
   1 -15  -4 1803.46 566.628   2 
  -1 -15  -4 903.828 424.590   2 
   1 -15   4 731.384 308.313   2 
   1 -15  -5 498.547 381.718   2 
   1 -15   5 220.636 360.374   2 
  -1 -15   5 732.710 458.885   2 
  -1 -15  -5 448.900 393.635   2 
  -1 -15  -6 2395.57 639.052   2 
   1 -15   6 2193.07 600.455   2 
  -1 -15  -7 27.4078 287.979   2 
  -1 -15  -8-63.2181 282.872   2 
   1 -16  -1 375.484 387.873   2 
   1 -16  -2 1015.99 435.137   2 
  -1 -16  -5 641.910 408.615   2 
   2   0   0 199.207 152.022   1 
  -2   0   0 63.7419 144.009   1 
   2   0  -1 118.250 124.535   1 
  -2   0  -1 522.524 186.172   1 
   2   0   1 251.348 180.138   1 
  -2   0   1-62.8925 140.543   1 
   2   0   2 207118. 1949.93   1 
  -2   0  -2 202981. 1938.77   1 
   2   0  -2 212029. 1772.06   1 
  -2   0   2 212811. 1764.66   1 
  -2   0  -3 141.745 168.953   1 
   2   0   3-24.0800 120.903   1 
   2   0  -3 7.00054 129.376   2 
  -2   0   3-148.692 130.945   1 
   2   0  -3 278.175 151.814   1 
  -2   0  -4 89102.7 1345.98   1 
   2   0   4 90698.0 1341.17   1 
  -2   0   4 90889.1 1121.88   1 
   2   0  -4 86289.7 1160.56   2 
  -2   0   5 73.3841 114.805   1 
   2   0   5-50.0864 150.290   1 
   2   0  -5 62.5995 124.202   2 
  -2   0  -5 49.7859 183.784   1 
   2   0  -6 68840.4 1033.40   2 
   2   0   6 72147.2 1269.10   1 
  -2   0  -6 70033.2 1255.37   1 
  -2   0   6 70163.6 1015.43   2 
  -2   0  -7-2.41383 178.493   1 
   2   0   7 106.889 185.861   3 
   2   0   7-416.408 179.606   1 
  -2   0   7-39.1130 134.854   2 
   2   0  -7 227.835 159.771   2 
  -2   0   8 42184.6 794.901   2 
   2   0  -8 40833.2 801.675   2 
   2   0   8 44241.2 1038.01   1 
   2   0   8 42436.1 1008.53   3 
  -2   0  -8 42190.0 1027.47   1 
   2   0   9-117.220 213.652   3 
   2   0  -9 29.4108 135.630   2 
  -2   0  -9 132.526 217.806   1 
  -2   0   9-142.823 131.420   2 
   2   0   9 16.1885 160.581   1 
  -2   0  10 4284.27 288.475   2 
   2   0 -10 4321.64 299.884   2 
  -2   0 -10 3908.93 362.239   3 
   2   0  10 4026.84 362.464   3 
  -2   0 -10 4151.28 379.286   1 
   2   0  10 4213.49 360.748   1 
   2   0 -10 3859.29 373.382   3 
   2   0 -11-134.102 216.478   3 
  -2   0 -11-18.8662 190.648   3 
   2   0 -11 32.8497 129.835   2 
  -2   0  11 42.6093 122.843   2 
  -2   0 -11 314.116 211.436   1 
   2   0  11-240.756 213.026   3 
   2   0  11-32.0729 173.447   1 
   2   0 -12 26279.0 687.235   2 
   2   0  12 26963.6 901.378   3 
   2   0  12 28158.7 915.289   1 
  -2   0 -12 25450.8 873.198   3 
  -2   0  12 26772.7 692.564   2 
   2   0 -12 27566.0 938.748   3 
  -2   0 -12 26712.7 915.096   1 
   2   0  13-55.2440 174.402   1 
   2   0 -13 11.4996 108.164   2 
   2   0 -13-119.354 248.168   3 
  -2   0 -13 328.054 228.741   3 
  -2   0 -13 13.4361 182.699   1 
   2   0  13-171.007 183.374   3 
  -2   0  13-110.238 123.573   2 
   2   0  14 6276.74 471.758   3 
  -2   0 -14 5950.58 452.785   3 
  -2   0  14 6126.20 363.748   2 
   2   0 -14 6149.63 526.720   3 
  -2   0 -14 6373.23 472.950   1 
   2   0 -14 6205.69 352.678   2 
   2   0  14 6385.02 466.685   1 
   2   0 -15-116.609 120.521   2 
  -2   0 -15-257.405 201.238   1 
  -2   0 -15 556.224 292.927   3 
  -2   0  15-17.6931 150.291   2 
   2   0  15-16.0572 152.975   1 
   2   0  15-109.425 164.243   3 
   2   0 -15 114.733 202.255   3 
   2   0  16 9126.74 593.160   3 
  -2   0 -16 9328.88 575.534   1 
  -2   0  16 8277.94 440.222   2 
   2   0 -16 8117.42 597.057   3 
  -2   0 -16 9821.36 598.983   3 
   2   0 -16 8780.00 431.726   2 
   2   0  16 8901.63 564.751   1 
  -2   0 -17 240.246 254.981   3 
   2   0  17 10.0822 189.315   3 
  -2   0 -17-146.194 184.483   1 
  -2   0  17-62.7007 115.511   2 
   2   0  17 28.9905 133.978   1 
   2   0 -17 95.1493 222.664   3 
   2   0 -17 169.861 117.384   2 
   2   0 -18 116.004 209.518   3 
  -2   0 -18 10.7756 169.458   1 
  -2   0 -18 253.186 215.810   3 
  -2   0  18 5.80518 112.947   2 
  -2   0  18-7.41396 93.9462   1 
   2   0  18-63.4506 201.487   3 
   2   0  18 222.674 135.590   1 
   2   0 -18 132.914 115.037   2 
  -2   0  19-70.0265 158.879   2 
   2   0  19 84.8024 170.070   1 
   2   0  19 179.535 194.760   3 
  -2   0 -19 127.648 203.991   1 
   2   0 -19 126.938 211.660   3 
  -2   0  19 63.0796 97.7112   1 
   2   0 -19-96.6667 114.113   2 
   2   0  20 12503.9 767.386   3 
   2   0 -20 12519.1 779.170   3 
   2   0  20 13312.9 747.654   1 
  -2   0 -20 14243.6 775.700   3 
  -2   0 -20 13271.5 737.798   1 
  -2   0  20 11973.9 554.467   2 
  -2   0  20 13295.1 540.528   1 
  -2   0  21 551.051 268.983   2 
   2   0  21 235.272 244.246   3 
  -2   0 -21 90.1894 191.279   1 
   2   0  21 359.038 237.823   1 
   2   0 -21 74.3023 300.787   3 
  -2   0  21 33.0840 94.4638   1 
   2   0  22 21163.9 989.576   1 
  -2   0 -22 21597.1 998.231   3 
  -2   0  22 19393.8 733.520   2 
   2   0  22 21131.5 1020.50   3 
   2   0 -22 20466.5 1043.54   3 
  -2   0  22 20825.3 703.751   1 
  -2   0 -22 21181.5 972.240   1 
  -2   0 -23 291.513 200.771   1 
  -2   0  23 309.375 213.127   2 
   2   0 -23 404.755 337.955   3 
  -2   0  23 68.3427 119.902   1 
   2   0  23 114.819 197.854   1 
  -2   0  24 62.1809 113.458   2 
   2   0  24-13.1312 173.995   1 
  -2   0  24-99.0971 88.7520   1 
  -2   0 -24 14.5465 210.338   1 
   2   0 -24-232.868 302.562   3 
  -2   0 -24-368.905 246.563   3 
  -2   0  25-32.7220 96.3652   1 
  -2   0 -25-14.9610 186.963   1 
  -2   0  25 96.7730 131.799   2 
   2   0 -25-250.236 307.131   3 
   2   0  25 98.5288 188.626   1 
  -2   0 -25-78.3422 245.504   3 
  -2   0 -26 600.919 247.596   1 
  -2   0  26 594.412 183.419   2 
  -2   0 -26 233.540 207.813   3 
  -2   0  26 599.042 139.871   1 
   2   0 -26 637.702 248.784   3 
  -2   0  27 122.785 165.872   2 
  -2   0 -27 404.169 282.501   3 
  -2   0  27-56.1646 101.445   1 
  -2   0 -27 50.3216 244.093   1 
   2   0 -27-129.463 244.611   3 
   2   0 -28 7920.86 713.458   3 
  -2   0 -28 8674.44 694.070   1 
  -2   0  28 8864.99 547.131   2 
  -2   0  28 8672.94 510.149   1 
  -2   0 -28 8196.84 695.372   3 
  -2   0 -29 220.589 243.093   3 
  -2   0 -29 74.0817 205.976   1 
   2   0 -29 287.020 295.609   3 
  -2   0  29 160.869 125.843   1 
  -2   0  29 147.178 166.471   2 
  -2   0 -30-106.002 284.066   3 
   2   0 -30 251.954 277.526   3 
  -2   0  30 33.4309 139.964   2 
  -2   0  30 331.796 142.643   1 
  -2   0 -30 97.3941 179.133   1 
   2   0  30-186.540 235.374   2 
  -2   0  31 315.257 160.743   2 
   2   0 -31-267.003 293.590   3 
  -2   0 -31-89.1043 241.083   1 
  -2   0 -31-250.511 324.858   3 
   2   0  31-299.667 236.582   2 
  -2   0 -32 1039.15 274.703   1 
   2   0 -32 933.811 369.971   3 
  -2   0 -32 243.714 233.537   3 
  -2   0  32 1120.14 246.327   2 
   2   0  32 1137.50 326.999   2 
   2   0 -33 803.469 428.719   3 
  -2   0 -33 581.825 409.626   3 
  -2   0  33 246.322 200.562   2 
   2   0  33 760.473 343.527   2 
   2   0  34 14010.7 948.251   2 
  -2   0 -34 14228.9 1091.24   3 
   2   0 -34 14538.5 1092.11   3 
  -2   0 -35 783.330 423.846   3 
   2   0 -35 821.758 428.914   3 
   2   0  35 638.649 370.533   2 
   2   0 -36 6315.83 790.769   3 
  -2   0 -36 5920.49 733.575   3 
   2   0  36 5006.93 601.676   2 
   2   0  37 230.202 246.229   2 
   2   0 -37 488.728 388.932   3 
  -2   0 -37 485.848 367.826   3 
   2   0 -38 2466.90 515.216   3 
  -2   0 -38 3235.09 591.174   3 
  -2   0 -39 906.741 403.088   3 
   2   0 -39 159.671 323.178   3 
  -2   0 -40 458.671 368.018   3 
   2   0 -40 4.33816 267.403   3 
   2   0 -41 300.616 363.190   3 
  -2   0 -41-20.0158 283.060   3 
  -2   0 -42 823.932 384.375   3 
   2   0 -42 980.840 474.717   3 
   2   0 -43-747.029 372.902   3 
  -2   0 -43-82.6841 378.035   3 
   2   0 -44 814.084 343.021   3 
  -2   0 -44 2236.35 559.279   3 
  -2   0 -45 12.0770 263.844   3 
   2   0 -45-653.509 385.099   3 
  -2   0 -46 38.2827 318.436   3 
   2   0 -46-494.007 389.160   3 
  -2   1   0 426595. 2609.76   1 
   2  -1   0 423411. 2614.03   1 
  -2  -1   0 431619. 2881.15   1 
   2   1   0 430258. 2864.70   2 
   2   1  -1 1241.16 198.056   2 
  -2   1   1 1521.86 188.681   1 
   2  -1   1 1799.64 240.142   1 
  -2  -1   1 1481.57 232.044   2 
  -2   1  -1 1534.47 211.956   1 
  -2  -1   1 1342.38 202.965   1 
   2   1   1 1133.54 205.909   1 
   2  -1  -1 1411.06 161.086   1 
  -2  -1  -1 1348.07 221.902   1 
   2   1   1 1321.34 230.570   2 
  -2   1   2 2298.39 217.837   1 
   2   1   2 1948.12 247.607   1 
  -2  -1  -2 2091.96 264.095   1 
  -2   1  -2 2164.81 256.328   1 
   2  -1  -2 2423.29 222.669   1 
   2  -1   2 2355.63 250.807   1 
   2   1  -2 2139.48 250.362   2 
  -2  -1   2 1948.88 243.365   2 
   2  -1  -3 45076.8 752.239   1 
   2   1  -3 44942.7 958.491   2 
   2  -1   3 45466.6 962.885   1 
  -2  -1   3 47721.8 950.118   2 
  -2   1  -3 47652.5 973.787   1 
  -2   1   3 48259.7 777.918   1 
   2   1   3 48653.7 1002.48   1 
  -2  -1  -3 45444.8 979.481   1 
  -2  -1   4 152667. 1707.35   2 
   2  -1   4 155806. 1810.58   1 
  -2   1  -4 154153. 1801.53   1 
   2  -1  -4 153771. 1326.85   1 
   2   1   4 153802. 1827.11   1 
  -2  -1  -4 150937. 1812.14   1 
  -2   1   4 153429. 1328.27   1 
   2   1  -4 153787. 1728.52   2 
  -2  -1  -5 163557. 1910.38   1 
  -2   1   5 165391. 1308.81   1 
   2  -1   5 164577. 1903.39   1 
  -2  -1   5 170091. 1800.65   2 
   2   1   5 165087. 1904.34   1 
   2   1  -5 162095. 1796.51   2 
   2   1   5 163807. 1893.72   3 
   2  -1  -5 165664. 1330.05   1 
  -2   1  -5 164894. 1918.98   1 
  -2   1  -6 268.895 198.989   1 
   2   1   6 709.770 194.642   1 
   2   1  -6 287.491 160.393   2 
  -2  -1   6 374.704 167.261   2 
   2   1   6 645.761 189.928   3 
  -2  -1  -6 562.810 210.659   1 
   2  -1   6 745.608 218.181   1 
  -2   1   6 543.542 107.957   1 
  -2   1  -7 34924.4 931.567   1 
  -2   1   7 34112.3 547.771   1 
   2   1  -7 32947.8 833.080   2 
   2   1   7 34240.4 914.203   1 
   2  -1   7 33934.9 927.340   1 
  -2  -1   7 34553.7 839.568   2 
   2   1   7 33904.4 939.239   3 
   2  -1  -7 33400.0 593.646   2 
  -2  -1  -7 34365.5 913.998   1 
  -2   1   8 144.126 78.5753   1 
  -2  -1   8 212.363 178.651   2 
   2   1  -8 159.579 182.505   2 
   2   1   8-37.1172 157.311   1 
  -2  -1  -8 21.0868 204.641   1 
   2  -1   8 637.742 250.441   1 
   2  -1   8 118.148 167.880   3 
  -2  -1  -8 117.336 254.506   3 
   2  -1  -8 161.050 232.598   3 
  -2   1  -8 153.884 211.975   1 
   2  -1  -8 323.661 121.522   2 
   2   1   8 132.763 191.559   3 
   2   1   9 21557.2 770.835   1 
   2  -1  -9 23398.1 493.120   2 
   2  -1   9 22928.7 711.146   3 
   2   1  -9 22716.7 723.341   2 
  -2   1  -9 21982.9 795.335   1 
   2  -1  -9 22073.4 821.872   3 
  -2  -1   9 22753.9 709.911   2 
  -2  -1  -9 21645.4 770.225   1 
   2   1   9 24157.3 831.834   3 
   2  -1   9 22430.6 790.287   1 
  -2  -1  -9 21657.1 799.034   3 
  -2   1   9 22423.2 418.639   1 
  -2  -1 -10 10.4654 199.277   1 
  -2  -1  10 55.7517 185.848   2 
  -2  -1 -10 531.209 333.896   3 
   2  -1  10 286.776 200.195   1 
   2  -1 -10 82.7625 94.4044   2 
   2   1 -10 93.6318 168.703   2 
   2  -1  10-207.399 175.373   3 
   2   1  10-158.729 210.681   3 
  -2   1  10 46.9009 61.8284   1 
  -2   1 -10-96.2819 208.451   1 
   2   1  10-114.648 162.944   1 
   2  -1 -10 133.470 279.836   3 
   2   1  11 1193.31 261.412   3 
  -2   1  11 727.924 93.1109   1 
  -2   1 -11 797.560 255.731   1 
   2   1 -11 554.199 191.506   2 
   2  -1  11 802.608 222.591   1 
   2  -1 -11 700.429 116.127   2 
  -2  -1  11 734.454 207.969   2 
   2  -1  11 939.229 208.123   3 
  -2  -1 -11 472.947 225.971   3 
   2  -1 -11 1147.11 314.824   3 
  -2   1  11 883.018 126.346   2 
   2   1  11 1012.91 233.928   1 
  -2  -1 -11 783.255 236.009   1 
   2   1 -12 7775.92 444.917   2 
   2   1  12 7115.79 472.295   1 
   2  -1  12 7809.48 524.748   1 
  -2   1 -12 7207.93 512.140   1 
  -2  -1 -12 6875.92 487.257   1 
   2  -1  12 7629.36 466.708   3 
  -2  -1  12 6821.50 436.275   2 
   2   1  12 7051.79 516.174   3 
  -2   1  12 7266.38 282.111   2 
   2   1 -12 6952.28 494.624   3 
   2  -1 -12 7162.97 533.642   3 
  -2  -1 -12 7162.50 519.357   3 
   2  -1 -12 7161.82 277.859   2 
   2  -1 -13 1741.19 152.351   2 
  -2  -1 -13 1681.95 278.102   1 
  -2  -1  13 1839.05 287.210   2 
  -2   1 -13 1595.05 265.682   3 
   2   1  13 1995.67 321.048   3 
   2   1  13 2329.73 330.167   1 
   2  -1  13 1399.66 232.992   3 
  -2   1 -13 1823.05 429.815   1 
   2  -1 -13 2079.36 374.118   3 
   2  -1  13 2199.33 366.779   1 
   2   1 -13 1794.16 292.766   3 
   2   1 -13 1764.91 240.417   2 
  -2  -1 -13 2125.64 353.502   3 
  -2   1  13 1712.22 157.871   2 
  -2   1 -14 74429.3 1433.77   3 
   2  -1 -14 76149.4 1716.26   3 
   2   1  14 78844.0 1600.50   1 
   2  -1  14 77932.5 1501.51   3 
  -2  -1  14 75942.5 1406.48   2 
   2   1  14 77394.9 1695.32   3 
  -2   1  14 76240.2 946.291   2 
  -2   1  14 74331.9 789.975   1 
   2  -1  14 79772.1 1682.51   1 
   2   1 -14 75265.0 1579.60   3 
   2  -1 -14 74968.4 928.748   2 
  -2  -1 -14 74069.5 1550.51   1 
  -2  -1 -14 77135.4 1659.61   3 
  -2   1 -14 76631.9 1643.88   1 
   2   1 -14 76123.8 1407.62   2 
   2   1  15 71118.9 1547.92   1 
  -2  -1 -15 70023.5 1642.79   3 
   2  -1 -15 73281.5 1727.99   3 
  -2   1 -15 72251.2 1635.85   1 
  -2   1  15 71788.5 938.614   2 
   2   1  15 73925.1 1704.74   3 
   2  -1  15 70762.9 1482.83   3 
   2  -1  15 72664.5 1648.11   1 
  -2   1  15 69414.7 791.422   1 
   2   1 -15 73416.7 1582.51   3 
  -2  -1 -15 71936.5 1532.28   1 
   2   1 -15 70562.1 1368.45   2 
   2  -1 -15 69206.2 928.409   2 
  -2  -1  15 68719.8 1346.57   2 
  -2   1 -15 69033.3 1407.00   3 
   2   1 -16 157.394 127.100   2 
  -2  -1 -16 381.806 198.593   1 
   2   1 -16 497.263 221.693   3 
  -2   1  16 400.289 73.7457   1 
  -2  -1  16 1905.94 530.049   2 
  -2   1 -16 785.673 451.163   1 
   2  -1  16 582.668 257.527   3 
   2   1  16 516.799 267.909   3 
   2  -1  16 1877.13 405.577   1 
   2   1  16 1347.88 412.303   1 
   2  -1 -16 207.257 89.8950   2 
  -2   1 -16 1226.30 306.578   3 
   2  -1 -16 522.856 394.278   3 
  -2   1  16 459.966 109.880   2 
   2   1  17 84410.9 1895.15   3 
   2  -1  17 83482.6 1846.43   1 
   2  -1 -17 86607.8 1957.07   3 
  -2  -1  17 85621.1 1592.03   2 
  -2   1 -17 87109.9 1863.03   1 
  -2   1  17 80072.9 909.968   1 
   2  -1  17 80929.6 1674.40   3 
  -2  -1 -17 81150.2 1688.13   1 
  -2   1 -17 83543.4 1651.38   3 
   2   1 -17 82030.9 1774.71   3 
   2   1  17 85073.5 1758.62   1 
   2   1 -17 80788.7 1532.85   2 
  -2   1  17 81516.6 1070.56   2 
  -2  -1 -17 87679.5 1934.80   3 
   2  -1 -18 103212. 2193.64   3 
  -2  -1 -18 107533. 2163.89   3 
   2   1  18 105999. 2006.52   1 
  -2  -1  18 102644. 1765.65   2 
  -2   1  18 103457. 1087.76   1 
  -2   1 -18 109937. 1959.92   3 
   2  -1  18 106620. 2114.02   1 
   2   1  18 105498. 2168.45   3 
  -2   1  18 104510. 1247.05   2 
   2   1 -18 105470. 2047.39   3 
   2   1 -18 102816. 1764.72   2 
  -2   1 -18 103852. 2072.70   1 
   2  -1  18 103669. 1923.75   3 
  -2  -1 -18 104943. 1966.51   1 
  -2   1  19 23363.9 545.750   1 
   2   1  19 24820.4 994.998   1 
  -2  -1  19 24364.3 929.464   2 
   2  -1 -19 23866.7 1157.46   3 
   2   1  19 24163.5 1067.00   3 
  -2  -1 -19 23169.5 959.247   1 
  -2   1 -19 26710.3 993.946   3 
  -2   1 -19 26633.8 1121.14   1 
   2   1 -19 24019.1 1017.61   3 
   2   1 -19 23817.2 860.688   2 
   2  -1  19 24890.2 1058.82   1 
   2  -1  19 22920.0 955.959   3 
  -2   1  19 22771.9 616.620   2 
  -2  -1 -19 31820.7 1227.19   3 
   2  -1 -20 5104.61 524.959   3 
   2   1  20 5623.17 501.964   1 
  -2  -1  20 5549.20 461.223   2 
   2  -1  20 5376.57 507.413   1 
  -2   1 -20 4921.78 507.159   3 
   2   1 -20 4563.08 478.235   3 
   2   1  20 5055.38 537.887   3 
   2   1 -20 4921.77 406.813   2 
  -2   1  20 5326.03 320.166   2 
  -2   1 -20 5487.83 558.131   1 
  -2  -1  20 5079.39 398.580   1 
  -2  -1 -20 7134.86 648.960   3 
  -2  -1 -20 4797.03 478.500   1 
   2  -1  20 5003.06 484.547   3 
  -2   1  20 5400.86 279.001   1 
  -2  -1 -21 2361.37 356.262   1 
  -2  -1 -21 4185.99 555.363   3 
  -2   1 -21 4285.66 521.633   3 
   2   1  21 3018.65 393.369   1 
  -2  -1  21 2412.98 294.983   1 
  -2   1  21 2479.21 253.845   2 
  -2  -1  21 3305.02 410.813   2 
  -2   1 -21 2385.08 428.323   1 
   2  -1  21 2558.17 348.646   3 
   2   1 -21 2772.34 404.662   3 
   2  -1  21 2447.68 382.535   1 
   2   1 -21 2525.88 306.527   2 
   2  -1 -21 2490.51 417.413   3 
  -2   1  21 2889.89 214.268   1 
   2  -1  22 20189.4 949.331   3 
  -2   1 -22 21395.6 1018.49   1 
   2   1  22 20685.0 949.205   1 
  -2   1  22 19887.3 551.665   1 
  -2  -1 -22 21535.3 964.141   1 
  -2   1 -22 21886.1 968.412   3 
   2   1 -22 20120.5 997.955   3 
  -2  -1  22 21006.0 828.953   1 
  -2   1  22 19829.4 617.226   2 
   2  -1 -22 19917.6 1064.05   3 
  -2  -1 -22 20354.3 1058.98   3 
   2  -1  22 20647.5 1001.71   1 
  -2  -1  22 20771.0 848.174   2 
  -2   1  23 2310.42 217.756   1 
   2  -1  23 2436.10 400.257   1 
  -2  -1  23 3612.64 465.251   2 
  -2  -1  23 1795.38 277.030   1 
  -2  -1 -23 2271.85 369.398   1 
  -2  -1 -23 5092.68 670.291   3 
  -2   1 -23 3644.14 581.301   3 
   2   1  23 2823.54 425.525   1 
   2   1 -23 1761.67 390.250   3 
  -2   1  23 2311.30 281.431   2 
   2  -1 -23 2494.11 488.453   3 
  -2   1 -23 2543.31 422.898   1 
   2  -1  23 1554.16 350.586   3 
   2  -1 -24 27650.2 1302.25   3 
  -2   1  24 26645.7 677.125   1 
  -2   1 -24 27933.5 1138.48   3 
  -2   1 -24 26506.7 1166.22   1 
   2   1  24 26632.3 1105.59   1 
   2  -1  24 26751.3 1157.85   3 
  -2  -1 -24 26631.9 1095.37   1 
  -2  -1  24 27180.7 999.231   2 
  -2  -1 -24 26472.3 1207.16   3 
  -2   1  24 25907.3 735.321   2 
  -2  -1  24 26470.7 966.224   1 
   2   1 -24 26461.4 1180.13   3 
   2   1  25 3388.06 442.432   1 
  -2  -1  25 3738.67 452.929   2 
   2   1 -25 2548.27 479.617   3 
  -2   1 -25 2763.86 451.904   1 
  -2  -1  25 1870.03 278.851   1 
  -2   1  25 3200.76 256.205   1 
  -2   1  25 3225.06 300.057   2 
  -2  -1 -25 2647.89 416.725   1 
  -2  -1 -25 3001.70 517.963   3 
  -2   1 -25 3681.85 499.462   3 
   2  -1 -25 2945.59 531.949   3 
   2   1  26 4052.59 455.520   1 
  -2   1 -26 3596.12 451.558   3 
  -2  -1  26 3990.60 411.440   2 
   2  -1 -26 3730.32 514.566   3 
  -2  -1 -26 3421.26 481.320   3 
  -2  -1  26 3660.40 367.068   1 
  -2   1  26 4099.95 283.981   1 
  -2   1 -26 4004.79 495.756   1 
   2   1 -26 3796.37 491.348   3 
  -2   1  26 4021.52 295.135   2 
  -2  -1 -26 3379.56 434.068   1 
  -2  -1  27 206.334 151.861   2 
  -2  -1 -27 376.432 215.376   1 
   2   1 -27 138.472 210.584   3 
  -2   1  27 49.7990 94.7105   2 
  -2   1 -27 184.084 214.894   3 
   2  -1 -27 366.930 236.759   3 
  -2  -1  27 166.937 136.273   1 
   2   1  27 332.317 208.562   1 
  -2   1 -27 283.247 210.250   1 
  -2   1  27 362.049 121.779   1 
  -2  -1 -27 117.590 241.509   3 
  -2  -1  28 214.379 144.301   1 
  -2  -1  28 379.214 198.629   2 
  -2  -1 -28 57.4632 157.107   1 
   2   1 -28 82.2088 230.801   3 
  -2  -1 -28 303.294 229.243   3 
  -2   1  28 110.413 96.5717   2 
  -2   1  28 374.016 104.330   1 
   2  -1 -28 78.2878 260.579   3 
   2  -1  28 111.685 191.499   2 
  -2   1 -28 367.854 262.482   1 
  -2   1 -28 75.8619 203.069   3 
  -2   1  29 77.4775 94.5670   2 
  -2  -1 -29 76.6308 201.980   1 
   2   1 -29 161.434 232.632   3 
  -2   1  29 2.62065 89.4104   1 
  -2  -1  29 310.154 224.130   2 
  -2   1 -29 4.49637 194.327   3 
   2  -1  29-211.586 239.751   2 
  -2  -1  29 74.0917 110.411   1 
  -2  -1 -29-407.902 286.440   3 
  -2   1 -29 218.424 234.265   1 
   2  -1 -29 236.732 317.803   3 
  -2  -1 -30 730.976 251.231   1 
  -2  -1  30 846.440 198.714   1 
   2  -1 -30 105.618 246.742   3 
  -2   1 -30 471.742 247.618   3 
  -2   1  30 429.001 132.267   2 
  -2   1  30 416.279 109.054   1 
  -2  -1 -30 256.280 268.804   3 
   2   1 -30 340.384 262.518   3 
  -2  -1  30 732.937 238.504   2 
   2  -1  30 109.939 211.606   2 
  -2   1 -31 465.681 325.572   3 
  -2  -1  31 197.603 175.166   2 
  -2  -1 -31-156.803 210.053   1 
   2  -1 -31 438.496 348.421   3 
  -2   1  31 80.3462 136.141   2 
  -2  -1  31 63.4243 125.008   1 
  -2  -1 -31 515.948 287.437   3 
   2   1 -31-50.7950 247.020   3 
   2  -1  31-146.372 214.491   2 
  -2  -1 -32 5616.62 678.890   3 
  -2  -1  32 5434.01 518.398   2 
  -2  -1 -32 5536.77 599.238   1 
  -2   1 -32 5453.87 618.353   3 
  -2   1  32 5500.00 388.600   2 
   2   1 -32 4907.62 638.125   3 
   2  -1 -32 5451.00 703.609   3 
   2  -1  32 4906.90 593.135   2 
  -2   1 -33 579.437 300.100   3 
  -2  -1 -33 882.912 345.685   3 
  -2  -1  33 309.341 247.181   2 
  -2  -1 -33 643.255 256.557   1 
   2  -1  33 231.096 266.321   2 
   2  -1 -33 1253.30 469.903   3 
   2   1 -33 1304.80 389.972   3 
   2   1  33 469.629 202.848   2 
   2  -1  34 158.675 252.048   2 
  -2   1 -34 366.147 311.561   3 
  -2  -1 -34 647.005 351.284   3 
  -2  -1 -34 122.001 221.561   1 
  -2  -1  34-94.7325 142.586   2 
   2   1 -34 229.055 275.919   3 
   2  -1 -34 513.887 273.127   3 
   2   1  34-73.7074 162.137   2 
  -2  -1 -35 565.395 299.162   1 
  -2  -1 -35 798.667 355.129   3 
  -2   1 -35 634.213 321.956   3 
   2  -1 -35 638.833 394.945   3 
  -2  -1  35 456.301 188.724   2 
   2  -1  35 338.689 272.475   2 
   2   1  35 588.235 231.203   2 
   2   1 -35 642.158 351.551   3 
  -2   1 -36 762.010 367.750   3 
   2  -1 -36-109.185 277.508   3 
   2   1  36 2.37075 175.789   2 
   2   1 -36 89.9136 310.454   3 
  -2  -1 -36 352.156 308.043   3 
   2  -1  36-293.169 242.069   2 
   2  -1  37 205.136 269.033   2 
   2   1 -37 210.564 362.716   3 
  -2  -1 -37 434.043 368.775   3 
   2  -1 -37 409.970 310.236   3 
  -2   1 -37 288.997 328.112   3 
   2  -1 -38 5593.67 788.536   3 
  -2  -1 -38 5355.31 757.451   3 
   2  -1  38 5298.93 668.839   2 
  -2   1 -38 5605.08 718.430   3 
   2   1 -38 5052.46 711.285   3 
   2   1 -39 2426.67 536.829   3 
   2  -1  39 1485.78 377.193   2 
   2  -1 -39 1862.89 499.586   3 
  -2  -1 -39 2361.78 553.003   3 
  -2   1 -39 2486.66 518.221   3 
  -2  -1 -40 2901.42 596.092   3 
   2   1 -40 3686.48 642.791   3 
   2  -1 -40 3095.31 615.683   3 
  -2   1 -40 2915.61 549.842   3 
  -2  -1 -41 908.333 503.169   3 
   2   1 -41-374.092 315.282   3 
  -2   1 -41 386.457 339.802   3 
   2  -1 -41 336.141 366.544   3 
  -2  -1 -42 721.022 440.048   3 
   2  -1 -42-215.546 267.638   3 
   2   1 -42-756.952 374.285   3 
  -2   1 -42 460.193 342.516   3 
   2  -1 -43 520.196 377.716   3 
  -2   1 -43 105.045 258.885   3 
  -2  -1 -43 716.250 491.606   3 
   2   1 -43-201.465 307.675   3 
  -2   1 -44 195.893 255.325   3 
  -2  -1 -44 640.612 329.671   3 
   2   1 -44-387.800 393.906   3 
   2  -1 -44 49.4539 344.984   3 
   2   1 -45-170.206 310.381   3 
  -2  -1 -45 346.958 336.551   3 
   2  -1 -45 12.1898 289.357   3 
   2  -2   0 408986. 2743.38   1 
  -2   2   0 398502. 2710.74   1 
  -2  -2   0 405505. 3064.56   2 
   2   2   0 409120. 3106.87   2 
  -2   2  -1 50176.6 1086.33   1 
  -2  -2  -1 32298.0 888.543   2 
  -2  -2   1 34320.1 903.482   2 
   2   2   1 31606.5 886.550   2 
   2  -2   1 35088.8 853.796   1 
   2   2  -1 31436.0 893.313   2 
   2  -2  -1 32541.1 766.701   1 
  -2   2   1 49434.9 984.567   1 
  -2   2   2 188418. 1717.67   1 
   2   2   2 188030. 2087.30   2 
   2   2  -2 187785. 2117.41   2 
  -2   2  -2 190355. 1999.70   1 
  -2  -2  -2 189063. 2068.03   2 
  -2  -2   2 182701. 2093.80   2 
   2  -2  -2 181576. 1699.73   1 
   2  -2   2 184039. 1977.18   1 
   2   2  -3 169665. 2032.40   2 
  -2   2   3 175196. 1571.25   1 
  -2  -2   3 170727. 2028.65   2 
   2   2   3 172949. 1947.85   3 
   2  -2   3 171967. 1981.34   1 
   2  -2  -3 167632. 1563.31   1 
  -2   2  -3 179632. 2006.03   1 
  -2  -2  -3 171422. 2026.02   1 
   2   2   3 169439. 1991.96   2 
   2  -2   4 38302.9 986.940   1 
   2  -2  -4 35526.1 685.310   1 
   2   2  -4 35620.2 952.022   2 
   2   2   4 38584.1 977.038   3 
   2   2   4 36491.1 938.050   2 
  -2  -2  -4 36611.2 963.682   1 
  -2   2   4 40470.0 735.992   1 
  -2  -2   4 35866.9 958.580   2 
  -2   2  -4 39023.5 1030.12   1 
  -2  -2   5 22715.4 790.412   2 
   2   2  -5 23548.3 787.511   2 
   2   2   5 24040.7 783.535   3 
  -2   2   5 24094.2 537.688   1 
   2  -2  -5 23293.1 526.780   1 
  -2   2  -5 26189.0 857.769   1 
   2   2   5 23800.5 764.109   2 
   2  -2  -5 22232.7 762.208   3 
   2  -2   5 25510.3 812.447   1 
  -2  -2  -5 22884.6 780.269   1 
   2  -2   6 59975.7 1284.69   1 
  -2   2   6 58679.6 756.195   1 
   2   2  -6 57943.3 1234.57   2 
  -2   2  -6 57970.3 1260.29   1 
   2   2   6 57059.3 1178.20   2 
  -2  -2   6 56821.5 1236.33   2 
   2  -2  -6 56747.9 1248.54   3 
  -2  -2  -6 58658.7 1218.80   1 
   2  -2  -6 59654.2 767.932   1 
   2   2   6 58653.5 1259.70   3 
   2  -2   7 39330.9 1075.13   1 
  -2   2  -7 39998.8 1079.41   1 
   2   2  -7 38214.4 1024.50   2 
   2  -2  -7 38398.0 580.328   1 
  -2  -2   7 38899.9 1029.13   2 
   2   2   7 38178.6 1055.69   3 
  -2  -2  -7 38242.6 1000.98   1 
  -2   2   7 39087.9 565.476   1 
   2  -2  -7 38011.7 1059.20   3 
  -2  -2  -7 43548.5 1232.00   3 
   2   2   7 39615.6 1024.20   1 
  -2  -2  -8 3923.10 412.847   3 
   2  -2  -8 3516.00 169.492   1 
   2  -2   8 4388.76 410.906   1 
  -2   2  -8 4776.24 471.562   1 
   2   2   8 3516.89 383.957   3 
   2   2  -8 3994.05 365.024   2 
  -2  -2  -8 3825.03 369.050   1 
  -2  -2   8 3743.73 387.055   2 
   2  -2  -8 4094.02 445.061   3 
  -2   2   8 3774.28 163.566   1 
   2   2   8 3842.70 366.698   1 
  -2   2  -9 2912.13 400.868   1 
   2   2   9 2577.78 311.755   1 
  -2  -2  -9 2993.77 335.951   1 
   2   2  -9 2905.18 343.490   2 
  -2  -2   9 2929.71 353.652   2 
   2   2   9 2952.73 355.815   3 
   2  -2   9 2898.71 256.060   3 
   2  -2  -9 3106.55 418.646   3 
  -2  -2  -9 2601.48 353.525   3 
   2  -2   9 3434.27 386.346   1 
   2  -2  -9 1546.16 112.341   2 
  -2  -2 -10 36053.5 1095.02   3 
  -2  -2 -10 35762.2 1008.88   1 
  -2  -2  10 34879.8 1012.63   2 
   2   2  10 37981.5 1147.91   3 
   2  -2  10 37863.0 851.020   3 
   2   2 -10 37159.4 1034.02   2 
   2  -2  10 37274.2 1116.95   1 
  -2   2 -10 36564.1 1107.87   1 
   2  -2 -10 37307.6 1146.59   3 
   2   2  10 36654.2 1039.04   1 
   2  -2  11 10583.9 617.457   1 
   2   2 -11 11426.1 589.532   2 
  -2  -2 -11 10654.6 563.213   1 
  -2  -2  11 10366.6 597.331   2 
  -2  -2 -11 11148.8 642.077   3 
   2  -2 -11 11172.0 658.652   3 
  -2   2 -11 11102.9 662.941   1 
   2   2  11 10413.7 576.728   1 
   2  -2  11 10728.6 476.289   3 
   2   2  11 10141.9 619.111   3 
  -2  -2  12 2136.26 320.961   2 
   2   2  12 2684.97 315.223   1 
   2   2 -12 2958.26 336.176   2 
  -2   2 -12 3487.92 452.022   1 
  -2  -2 -12 2611.77 313.245   1 
   2  -2  12 2517.58 261.772   3 
   2   2  12 2651.78 339.096   3 
   2  -2 -12 2718.77 401.934   3 
   2  -2  12 2976.47 382.161   1 
  -2  -2 -12 2736.72 386.021   3 
  -2  -2  13 21818.5 830.558   2 
  -2  -2 -13 21108.6 808.686   1 
   2   2  13 23541.2 971.410   3 
   2   2 -13 22167.7 806.779   3 
   2  -2 -13 22577.8 963.586   3 
   2   2 -13 22924.6 853.879   2 
  -2   2  13 22309.8 934.216   3 
   2  -2  13 21934.2 721.592   3 
  -2   2 -13 22982.7 933.595   1 
   2   2  13 22729.3 844.927   1 
  -2  -2 -13 23510.3 930.911   3 
   2  -2  13 22258.7 923.351   1 
  -2   2 -14 722.032 286.805   1 
   2   2  14 433.807 201.029   3 
   2   2 -14 785.502 238.660   2 
  -2  -2 -14 13.8169 194.853   1 
   2   2  14 465.217 177.474   1 
   2  -2  14 582.672 162.180   3 
   2  -2  14 559.938 250.311   1 
  -2  -2  14 769.475 304.226   2 
  -2   2  14 791.386 307.348   3 
   2  -2 -14 709.082 303.246   3 
   2   2 -14 685.050 224.167   3 
  -2   2 -15 7034.34 562.895   1 
   2  -2  15 7687.62 466.529   3 
   2   2  15 7664.40 600.998   3 
   2   2  15 7975.79 521.824   1 
  -2  -2 -15 7571.51 507.871   1 
  -2   2  15 7983.77 596.796   3 
   2   2 -15 7888.44 506.620   3 
  -2  -2  15 7211.33 523.585   2 
  -2  -2 -15 8192.92 600.566   3 
   2  -2 -15 6957.87 593.837   3 
   2   2 -15 7264.40 505.528   2 
   2  -2  15 7676.01 572.577   1 
  -2  -2  16 2064.36 351.124   2 
   2   2 -16 1634.18 262.209   2 
   2  -2  16 1779.76 318.321   1 
  -2  -2 -16 1306.76 246.942   1 
   2   2  16 1587.93 273.965   1 
  -2   2 -16 1565.14 283.146   3 
   2   2  16 1552.47 339.758   3 
   2  -2 -16 1101.28 314.304   3 
  -2   2 -16 1805.83 342.450   1 
   2  -2  16 1402.81 241.209   3 
   2   2 -16 1706.45 291.071   3 
  -2   2  16 1726.46 343.038   3 
  -2  -2 -16 2026.24 384.414   3 
  -2   2 -17 12424.3 605.892   3 
  -2   2 -17 12454.6 743.208   1 
   2   2 -17 12526.1 671.804   3 
  -2  -2  17 11731.7 668.214   2 
   2  -2  17 12523.4 620.345   3 
   2  -2 -17 12599.0 816.190   3 
  -2  -2 -17 12230.8 655.896   1 
   2   2 -17 13044.3 683.543   2 
  -2   2  17 12751.1 799.251   3 
   2   2  17 12632.5 678.877   1 
   2   2  17 12697.1 784.813   3 
   2  -2  17 13099.3 766.008   1 
  -2  -2 -17 13356.0 785.123   3 
   2  -2  18 1098.44 237.083   3 
   2   2 -18 857.758 203.804   2 
  -2  -2  18 1407.76 328.476   2 
  -2   2 -18 754.190 272.708   1 
  -2  -2 -18 734.289 216.341   1 
  -2   2 -18 672.794 224.131   3 
   2  -2  18 1049.39 275.465   1 
   2   2 -18 709.703 232.398   3 
   2   2  18 940.801 310.996   3 
   2   2  18 927.641 239.300   1 
   2  -2 -18 362.677 289.057   3 
  -2  -2 -18 2013.07 417.934   3 
  -2  -2  19 4307.75 446.889   2 
  -2   2 -19 3514.12 437.536   1 
  -2   2 -19 4401.79 398.841   3 
  -2  -2 -19 4460.48 492.034   3 
   2   2 -19 4156.57 420.238   2 
   2   2 -19 4365.62 451.977   3 
  -2  -2 -19 4266.18 425.800   1 
   2  -2  19 4586.07 402.037   3 
   2   2  19 4324.99 427.818   1 
   2  -2  19 4018.51 464.353   1 
   2  -2 -19 3616.48 480.290   3 
  -2  -2  20 755.430 243.972   2 
   2   2  20 362.902 198.648   1 
   2  -2  20 308.615 201.383   1 
  -2   2 -20 472.277 235.327   1 
  -2  -2 -20 211.863 156.969   1 
  -2  -2 -20-149.441 221.330   3 
   2   2 -20 227.030 183.402   3 
   2  -2 -20-204.914 267.321   3 
   2  -2  20 405.049 156.575   3 
  -2   2 -20 155.168 173.610   3 
   2   2 -20 258.537 176.756   2 
  -2  -2  21 1681.26 317.734   2 
   2  -2 -21 1297.72 337.486   3 
  -2   2 -21 1263.51 325.127   1 
   2   2  21 1546.70 285.363   1 
   2  -2  21 828.633 211.147   3 
  -2  -2 -21 1896.01 397.090   3 
   2   2 -21 1229.01 281.568   3 
  -2  -2 -21 1363.13 273.462   1 
  -2   2 -21 1637.32 297.383   3 
   2   2 -21 1392.20 283.885   2 
  -2   2 -22 4825.99 478.699   3 
  -2  -2  22 4637.88 468.933   2 
   2   2 -22 4332.31 484.061   3 
  -2   2 -22 4429.16 527.316   1 
  -2  -2  22 4214.89 424.276   1 
   2  -2  22 4442.72 432.681   3 
   2  -2 -22 3869.19 532.647   3 
   2   2 -22 5084.29 477.171   2 
  -2  -2 -22 5327.05 604.045   3 
   2   2  22 4612.81 462.069   1 
  -2  -2 -22 4415.68 438.643   1 
  -2  -2 -23 6803.02 539.334   1 
  -2  -2 -23 7757.51 702.666   3 
   2  -2 -23 6828.44 698.253   3 
  -2   2 -23 7207.03 564.860   3 
  -2  -2  23 7057.06 562.007   1 
  -2   2  23 5833.72 212.598   2 
   2  -2  23 7549.96 601.524   3 
  -2   2 -23 6782.25 636.951   1 
  -2  -2  23 7664.91 585.065   2 
   2   2 -23 6651.89 583.221   3 
   2   2 -23 6823.64 551.704   2 
   2   2  23 7236.08 582.977   1 
   2  -2  24 3115.39 400.475   3 
  -2  -2  24 2562.08 361.261   1 
   2  -2 -24 2967.13 501.550   3 
  -2  -2  24 3730.32 440.023   2 
  -2  -2 -24 3219.03 479.643   3 
  -2   2  24 2339.69 146.814   2 
  -2   2 -24 2702.40 440.188   1 
   2  -2  24 2772.90 438.309   2 
  -2   2 -24 3845.06 442.121   3 
  -2  -2 -24 2464.54 349.240   1 
   2   2  24 3255.60 402.568   1 
   2   2 -24 2852.82 419.236   3 
   2  -2  25 3875.08 437.785   3 
  -2  -2  25 3811.98 422.691   1 
   2  -2 -25 3641.95 564.759   3 
  -2  -2 -25 3850.60 426.868   1 
   2  -2  25 3350.79 485.499   2 
  -2   2 -25 3311.09 496.022   1 
  -2   2  25 3288.99 173.107   2 
  -2  -2 -25 3372.19 463.960   3 
  -2   2 -25 4363.93 479.404   3 
   2   2 -25 3243.30 425.783   3 
  -2  -2  25 3537.93 428.027   2 
   2   2  25 3874.03 440.779   1 
  -2  -2 -26 284.955 232.161   3 
  -2   2 -26 564.323 262.449   3 
  -2  -2 -26 34.7847 170.385   1 
   2  -2  26 5.57903 208.181   2 
   2   2  26 135.316 145.912   1 
  -2  -2  26 141.223 138.686   1 
   2  -2 -26 545.545 288.274   3 
  -2  -2  26 502.552 216.989   2 
  -2   2  26 280.897 65.0752   2 
   2   2 -26 54.9993 247.572   3 
   2  -2  26 489.119 226.894   3 
  -2  -2  27-332.585 200.121   2 
  -2  -2  27-35.6705 132.849   1 
   2   2 -27-220.037 246.010   3 
   2   2  27-86.6331 160.159   1 
  -2  -2 -27-81.4491 244.376   3 
   2  -2  27-109.647 232.252   2 
   2  -2 -27-620.606 323.175   3 
  -2   2  27 26.8267 40.3333   2 
  -2  -2 -27-126.541 200.299   1 
   2   2  28 2625.09 385.374   1 
  -2   2 -28 3114.88 417.399   3 
  -2   2  28 2580.51 167.911   2 
   2  -2 -28 3031.27 505.691   3 
   2  -2  28 2781.21 457.956   2 
  -2  -2 -28 2848.87 378.377   1 
  -2  -2  28 2745.18 411.907   2 
   2   2 -28 2580.24 425.133   3 
  -2  -2 -28 2957.68 490.997   3 
  -2  -2  28 2630.97 371.215   1 
   2  -2 -29-50.4358 268.795   3 
   2   2  29 153.964 198.539   1 
  -2  -2 -29 27.9080 285.508   3 
   2   2 -29-371.375 273.429   3 
  -2   2  29 70.0669 52.2389   2 
  -2   2 -29-156.151 199.772   3 
  -2  -2  29-109.796 143.813   1 
  -2  -2 -29 140.984 183.327   1 
  -2  -2  29-209.564 169.065   2 
   2  -2  29 137.264 257.015   2 
   2  -2  30 3285.90 526.137   2 
  -2  -2 -30 3397.93 435.685   1 
  -2  -2  30 2623.56 384.731   1 
  -2  -2  30 2917.98 426.826   2 
  -2   2 -30 3179.82 462.027   3 
  -2  -2 -30 2267.30 439.266   3 
   2   2 -30 3082.87 455.725   3 
   2  -2 -30 3589.44 576.442   3 
  -2   2  30 2631.26 177.187   2 
  -2  -2 -31 3490.19 458.832   1 
  -2  -2  31 4108.11 507.282   2 
  -2  -2 -31 4029.06 629.104   3 
   2  -2 -31 4536.36 680.943   3 
   2   2 -31 4123.04 601.912   3 
  -2   2 -31 4335.95 547.750   3 
   2  -2  31 3107.34 511.843   2 
  -2  -2  32 9567.58 744.613   2 
  -2   2 -32 9880.10 800.692   3 
   2  -2 -32 9239.55 935.538   3 
   2   2 -32 9071.38 804.839   3 
  -2  -2 -32 9854.82 916.440   3 
   2  -2  32 9020.92 833.395   2 
  -2  -2 -32 10426.1 766.853   1 
   2  -2 -33 4330.67 696.897   3 
   2   2 -33 4401.62 623.738   3 
  -2  -2  33 3845.56 520.912   2 
  -2  -2 -33 5100.66 720.065   3 
   2  -2  33 3544.28 548.579   2 
  -2   2 -33 3690.86 544.171   3 
  -2  -2 -33 3131.21 452.368   1 
   2  -2  34 1963.69 454.374   2 
  -2  -2 -34 2589.02 528.642   3 
   2  -2 -34 2098.15 517.150   3 
  -2  -2  34 2040.37 390.804   2 
  -2  -2 -34 1972.34 377.833   1 
  -2   2 -34 1748.92 400.926   3 
   2   2 -34 1856.40 447.039   3 
   2  -2  35 1279.13 422.105   2 
  -2  -2  35 1423.06 345.800   2 
   2  -2 -35 1678.21 456.331   3 
  -2   2 -35 1727.11 372.893   3 
  -2  -2 -35 1163.22 379.348   3 
   2   2 -35 2094.53 486.791   3 
  -2  -2 -35 1261.89 313.164   1 
   2   2  35 1266.80 282.862   2 
  -2  -2 -36 302.215 231.171   1 
   2  -2  36 9.15765 247.280   2 
   2   2 -36 251.266 287.273   3 
  -2  -2 -36-84.5828 283.600   3 
  -2  -2  36 70.2903 203.992   2 
   2  -2 -36 285.756 367.001   3 
  -2   2 -36 586.021 290.004   3 
  -2  -2 -37 3320.44 647.146   3 
   2  -2 -37 3011.84 612.120   3 
   2  -2  37 2596.73 507.267   2 
  -2   2 -37 3215.30 525.330   3 
   2   2 -37 3768.54 566.771   3 
   2  -2  38 2149.18 457.111   2 
  -2   2 -38 2098.13 453.095   3 
   2  -2 -38 2724.29 621.809   3 
  -2  -2 -38 1369.03 459.548   3 
   2   2 -38 1588.01 417.159   3 
   2  -2  39 66.1873 216.579   2 
   2   2 -39 109.532 244.542   3 
  -2  -2 -39 92.0628 330.408   3 
   2  -2 -39 887.979 439.466   3 
  -2   2 -39 201.937 280.079   3 
   2   2 -40 627.727 295.481   3 
   2  -2  40 1172.56 377.402   2 
   2  -2 -40 421.562 344.126   3 
  -2   2 -40 1447.58 400.677   3 
  -2   2 -41 2315.05 547.596   3 
  -2  -2 -41 2881.40 697.287   3 
   2   2 -41 1790.61 452.599   3 
   2  -2 -41 1870.17 580.648   3 
  -2  -2 -42 874.424 461.322   3 
   2   2 -42 272.075 306.658   3 
   2  -2 -42-25.2704 302.272   3 
  -2  -2 -43 484.642 392.067   3 
   2   2 -43-66.9250 279.844   3 
   2  -2 -43-426.127 365.016   3 
   2  -2 -44 547.910 346.259   3 
  -2  -2 -44 561.264 389.449   3 
  -2  -3   0 172980. 2227.65   2 
  -2   3   0 169097. 1988.04   1 
   2   3   0 176420. 2255.57   2 
   2  -3   0 171764. 1972.94   1 
  -2   3  -1 25223.1 834.979   1 
   2   3   1 24383.2 762.432   3 
   2   3  -1 24260.9 853.432   2 
   2  -3   1 25674.1 817.644   1 
   2  -3  -1 26058.4 765.916   1 
  -2  -3  -1 24914.4 861.836   2 
  -2  -3   1 25009.9 865.530   2 
  -2   3   1 26377.8 778.849   1 
   2   3   1 25172.1 867.194   2 
   2   3  -2 5930.96 455.267   2 
   2  -3  -2 6909.18 444.713   1 
  -2  -3  -2 6389.53 476.048   2 
   2   3   2 6463.31 481.737   2 
   2  -3  -2 6364.42 425.938   3 
   2  -3   2 7675.55 517.953   1 
   2   3   2 6216.81 433.640   3 
  -2   3   2 6302.93 392.360   1 
  -2  -3   2 6268.42 504.063   2 
   2   3  -3 231708. 2629.22   2 
  -2   3  -3 226072. 2491.42   1 
   2  -3  -3 229280. 2048.91   1 
   2   3   3 228913. 2539.05   2 
   2  -3   3 220024. 2455.55   1 
   2  -3  -3 228902. 2336.85   3 
  -2  -3  -3 229944. 2502.58   2 
  -2   3   3 225374. 2051.20   1 
   2   3   3 228498. 2431.59   3 
  -2  -3   3 229821. 2638.99   2 
   2  -3  -4 4453.42 363.482   1 
   2   3   4 4156.43 393.136   3 
   2  -3   4 5782.24 529.863   1 
  -2  -3   4 4081.60 432.460   2 
   2   3   4 3765.23 375.009   2 
  -2  -3  -4 3797.68 405.883   2 
   2  -3  -4 3861.74 400.507   3 
   2   3  -4 3431.66 391.538   2 
  -2  -3  -5 73811.9 1410.96   2 
   2   3  -5 72851.4 1509.27   2 
   2  -3  -5 71218.3 1053.62   1 
  -2   3  -5 72831.3 1501.75   1 
  -2  -3   5 68823.9 1485.06   2 
   2  -3   5 69588.0 1460.10   1 
   2   3   5 71656.3 1426.30   3 
   2   3   5 69873.4 1409.56   2 
   2  -3  -5 70068.0 1401.04   3 
   2  -3   6 43637.5 1177.66   1 
  -2  -3  -6 40311.4 1098.59   3 
   2   3  -6 42222.0 1176.44   2 
   2  -3  -6 42995.4 769.375   1 
   2   3   6 42878.7 1158.26   3 
  -2  -3   6 41038.4 1172.16   2 
  -2   3  -6 44787.2 1221.74   1 
   2   3   6 42246.5 1092.39   2 
   2  -3  -6 40971.6 1128.00   3 
  -2  -3  -6 42086.0 1127.46   1 
  -2  -3  -7 556.553 223.046   1 
   2  -3   7 688.308 264.641   1 
   2   3  -7 250.177 198.529   2 
   2  -3  -7 359.110 281.061   3 
   2   3   7 264.514 209.800   3 
  -2  -3  -7 656.147 269.386   3 
   2  -3  -7 269.941 97.2985   1 
  -2  -3   7 278.330 239.503   2 
   2   3   7 265.618 188.279   2 
  -2  -3  -8 1451.09 321.171   3 
   2   3   8 1495.97 302.271   3 
  -2  -3   8 1208.40 300.817   2 
   2   3  -8 1219.52 275.737   2 
  -2   3  -8 1887.11 374.033   1 
   2  -3  -8 1314.84 140.524   1 
   2   3   8 1404.73 241.399   2 
   2  -3  -8 1000.67 306.193   3 
  -2  -3  -8 1655.94 295.829   1 
   2  -3   8 1054.73 259.710   1 
   2   3   9 24796.3 965.935   3 
   2   3  -9 26631.9 960.908   2 
   2  -3   9 24882.7 958.864   1 
  -2  -3  -9 24455.0 886.811   1 
  -2  -3   9 23910.7 926.837   2 
   2  -3  -9 23256.5 930.111   3 
   2  -3  -9 23695.7 465.677   1 
  -2  -3  -9 24535.5 948.632   3 
   2   3   9 25046.1 836.425   2 
  -2   3  -9 24763.1 967.377   1 
   2  -3   9 24119.7 600.076   3 
   2  -3  -9 24873.5 469.470   2 
   2   3 -10 10825.8 644.153   2 
   2   3  10 11130.6 670.298   3 
   2  -3 -10 10010.7 274.580   2 
  -2  -3  10 10519.9 670.263   2 
  -2  -3 -10 11360.4 687.203   3 
   2  -3 -10 9692.90 268.276   1 
   2   3  10 10573.9 554.338   2 
   2  -3 -10 10954.2 694.238   3 
   2  -3  10 9537.46 405.867   3 
   2  -3  10 11346.6 675.667   1 
  -2   3 -10 12898.8 764.608   1 
  -2   3  10 10633.0 647.838   3 
  -2  -3 -10 10535.3 590.786   1 
   2   3 -11 42729.9 1255.67   2 
  -2  -3  11 42261.6 1255.54   2 
   2  -3  11 42996.5 1314.95   1 
   2   3  11 42222.7 1105.94   2 
  -2   3 -11 41765.5 1307.31   1 
   2   3  11 43115.7 1302.19   3 
  -2  -3 -11 42532.8 1161.03   1 
  -2  -3 -11 43367.0 1266.03   3 
  -2   3  11 42594.4 1283.39   3 
   2  -3 -11 40740.0 1285.22   3 
   2  -3  11 42323.9 829.727   3 
   2   3  12 40359.9 1101.66   2 
  -2  -3 -12 40273.6 1149.70   1 
   2  -3  12 40171.4 855.205   3 
  -2  -3 -12 43586.4 1322.36   3 
   2  -3 -12 40164.6 1318.41   3 
   2  -3  12 42198.6 1314.23   1 
  -2   3  12 39011.7 1267.13   3 
   2   3  12 40513.1 1310.03   3 
  -2   3 -12 41554.3 1326.86   1 
  -2  -3  12 41241.1 1268.50   2 
   2   3 -12 40422.2 1252.41   2 
   2   3  13 19276.2 774.294   2 
  -2  -3 -13 22925.9 1003.33   3 
  -2  -3 -13 19338.8 803.949   1 
  -2  -3  13 19807.6 925.594   2 
   2  -3  13 20467.4 946.278   1 
   2   3  13 19668.2 933.023   3 
  -2   3  13 20622.1 961.400   3 
  -2   3 -13 19530.2 945.089   1 
   2   3 -13 19678.5 877.086   2 
   2  -3 -13 19356.3 934.585   3 
   2  -3  13 18770.7 605.475   3 
  -2   3 -14 8484.79 697.433   1 
  -2  -3 -14 6137.14 468.886   1 
   2   3  14 6618.81 586.501   3 
  -2  -3  14 8258.81 688.939   2 
   2  -3  14 5916.51 533.834   1 
   2  -3  14 6410.25 365.942   3 
  -2   3  14 6486.60 566.146   3 
   2   3 -14 6681.99 456.274   3 
   2  -3 -14 6197.26 579.295   3 
   2   3  14 6318.62 477.834   1 
   2   3 -14 6157.86 519.231   2 
   2  -3  15 40890.9 1359.52   1 
  -2  -3 -15 39633.6 1174.96   1 
   2   3 -15 39630.6 1071.53   3 
   2   3  15 42218.6 1412.60   3 
  -2  -3 -15 38735.5 1317.69   3 
   2  -3  15 39375.5 939.255   3 
   2  -3 -15 37379.2 1348.09   3 
  -2   3 -15 38431.2 1336.87   1 
  -2  -3  15 39031.2 1266.33   2 
   2   3  15 40141.4 1188.00   1 
  -2   3  15 41421.0 1393.32   3 
   2   3 -15 39865.6 1283.11   2 
  -2  -3 -16 2553.32 317.229   1 
  -2  -3 -16 4671.73 681.256   3 
   2   3 -16 2597.40 363.652   2 
   2   3  16 3261.96 465.932   3 
  -2  -3  16 4280.15 572.884   2 
  -2   3  16 3362.58 511.921   3 
  -2   3 -16 4276.44 559.542   1 
   2   3  16 2938.16 382.571   1 
   2  -3  16 2777.13 273.994   3 
   2   3 -16 2758.73 334.460   3 
   2  -3 -16 2456.22 507.646   3 
   2  -3  16 2840.23 416.895   1 
  -2   3 -17 13300.7 833.245   1 
  -2  -3 -17 13809.2 841.702   3 
   2  -3  17 12622.9 800.776   1 
  -2  -3 -17 12810.7 685.463   1 
   2   3 -17 13582.6 663.298   3 
   2  -3 -17 14110.9 894.136   3 
  -2  -3  17 13236.5 769.538   2 
   2  -3  17 13018.7 579.184   3 
   2   3  17 13745.8 721.299   1 
   2   3 -17 12682.3 746.434   2 
   2   3 -18 6799.48 503.658   3 
   2  -3  18 6602.30 596.490   1 
  -2  -3  18 9214.87 690.137   2 
   2  -3  18 6643.15 437.923   3 
  -2  -3 -18 6280.83 496.965   1 
   2  -3  18 7245.21 648.498   2 
   2  -3 -18 7275.98 688.924   3 
  -2   3 -18 6949.01 631.223   1 
   2   3  18 7140.93 542.936   1 
  -2  -3 -18 9917.81 801.064   3 
   2   3 -18 6639.88 557.903   2 
   2  -3 -19 16582.6 998.102   3 
  -2   3 -19 15972.1 976.137   1 
  -2  -3  19 20157.0 1014.29   2 
  -2  -3 -19 21107.7 1111.49   3 
  -2  -3 -19 15564.2 767.426   1 
   2  -3  19 16579.3 698.240   3 
   2   3  19 17100.6 850.143   1 
   2   3 -19 16823.1 879.469   2 
   2  -3  19 15441.4 929.177   2 
   2   3 -19 16048.4 759.687   3 
  -2  -3  20 45907.8 1448.80   2 
   2   3 -20 47697.3 1339.39   3 
  -2  -3 -20 48241.7 1369.73   1 
   2  -3 -20 48211.4 1690.51   3 
   2  -3  20 45565.6 1542.96   2 
   2  -3  20 46366.0 1212.05   3 
   2   3  20 48971.5 1400.85   1 
   2   3 -20 47754.5 1495.25   2 
  -2  -3 -20 47252.8 1617.18   3 
  -2  -3 -21 6377.20 730.087   3 
   2   3  21 2923.57 407.998   1 
  -2   3 -21 3399.20 399.393   3 
  -2  -3  21 5405.47 587.761   2 
  -2  -3 -21 1931.08 311.575   1 
   2   3 -21 2610.26 401.309   2 
   2  -3 -21 2560.99 561.211   3 
   2   3 -21 2473.26 344.152   3 
   2  -3  21 2755.62 338.721   3 
   2  -3  21 5072.53 661.639   2 
  -2  -3  22 7753.14 674.261   2 
   2   3 -22 6170.04 527.579   3 
  -2   3 -22 6673.54 522.396   3 
  -2  -3 -22 7264.63 740.173   3 
  -2  -3 -22 6368.71 518.559   1 
   2   3  22 5954.59 523.458   1 
   2  -3 -22 5729.15 641.948   3 
   2  -3  22 7010.89 674.422   2 
   2   3 -22 5599.60 560.264   2 
   2  -3  22 5653.32 465.033   3 
   2   3 -23 16022.7 917.263   2 
  -2  -3  23 17089.9 947.722   2 
  -2   3 -23 17340.7 789.074   3 
  -2  -3 -23 16811.4 1024.76   3 
   2  -3  23 16984.1 800.539   3 
   2   3 -23 17704.4 875.315   3 
   2  -3  23 16985.6 994.184   2 
  -2  -3 -23 17094.1 854.374   1 
   2  -3 -23 16717.1 1072.31   3 
   2   3  23 17305.9 877.121   1 
   2   3  24 1566.60 331.186   1 
  -2  -3  24 3181.17 499.433   2 
  -2   3 -24 1543.19 360.818   3 
  -2  -3 -24 692.680 205.327   1 
   2  -3  24 1647.16 416.009   2 
   2  -3 -24 1105.06 392.469   3 
  -2  -3  24 1084.34 268.003   1 
   2   3 -24 966.743 258.631   3 
  -2  -3 -24 3049.72 592.808   3 
   2  -3  24 1000.23 278.520   3 
  -2  -3  25 15100.7 900.469   2 
  -2  -3 -25 15696.8 1012.10   3 
   2  -3  25 13956.7 769.274   3 
   2   3 -25 15339.5 857.155   3 
  -2   3 -25 15611.9 788.203   3 
   2  -3  25 14265.4 968.817   2 
   2   3  25 15008.3 846.000   1 
   2  -3 -25 14477.7 1036.13   3 
  -2  -3 -25 15235.4 831.644   1 
   2   3  26 1206.69 297.089   1 
   2   3 -26 1423.18 387.811   3 
  -2  -3  26 1666.89 355.814   2 
  -2   3 -26 1614.79 353.463   3 
  -2  -3 -26 1773.19 451.014   3 
   2  -3 -26 1252.18 433.457   3 
   2  -3  26 1000.86 266.310   3 
   2  -3  26 1949.12 435.234   2 
  -2  -3 -26 884.698 253.040   1 
  -2   3 -27-42.1497 161.951   3 
   2   3  27 112.127 139.293   1 
  -2  -3  27 2.31767 242.026   2 
  -2  -3 -27 521.162 276.447   3 
   2  -3 -27 15.6747 233.030   3 
   2   3 -27 187.023 223.184   3 
   2  -3  27 223.264 189.673   3 
  -2  -3 -27-20.7756 157.795   1 
   2  -3  27-467.106 265.551   2 
   2  -3  28 35.3956 226.318   2 
  -2  -3 -28 443.382 306.916   3 
   2   3  28 373.803 183.751   1 
  -2  -3 -28 157.289 152.991   1 
  -2  -3  28 414.306 205.480   2 
   2  -3  28 478.985 244.716   3 
  -2   3 -28 961.532 266.080   3 
   2   3 -28 289.696 194.210   3 
   2  -3 -28 222.659 242.084   3 
   2  -3  29 146.961 230.599   2 
   2   3  29 265.025 172.485   1 
  -2  -3  29 158.072 221.187   2 
  -2  -3 -29-19.5134 189.069   1 
  -2   3 -29 349.145 218.851   3 
  -2  -3 -29 959.286 418.145   3 
   2  -3 -29 145.939 281.058   3 
   2   3 -29-26.4024 207.356   3 
  -2   3 -30 812.546 269.446   3 
   2  -3  30 797.583 317.388   2 
   2   3  30 749.270 233.952   1 
  -2  -3  30 516.553 227.852   2 
  -2  -3 -30 639.241 230.281   1 
  -2  -3 -30 870.452 409.578   3 
   2   3 -30 721.627 284.359   3 
   2  -3 -30 1485.81 490.763   3 
   2  -3  31 1445.69 405.821   2 
  -2  -3 -31 1327.93 471.355   3 
   2   3 -31 908.011 294.312   3 
  -2   3 -31 959.937 270.077   3 
  -2  -3  31 768.423 289.160   2 
  -2  -3 -31 1098.61 273.535   1 
   2  -3 -31 1527.51 465.752   3 
   2  -3  32 110.226 235.069   2 
  -2  -3  32 729.030 291.322   2 
  -2   3 -32 718.600 310.106   3 
   2  -3 -32 580.804 381.392   3 
  -2  -3 -32 113.804 163.950   1 
  -2  -3 -32 913.627 428.486   3 
   2   3 -32 1360.45 332.164   3 
   2  -3  33 3625.45 573.159   2 
  -2   3 -33 4314.56 520.906   3 
   2  -3 -33 4296.12 687.561   3 
  -2  -3 -33 4346.01 682.320   3 
   2   3 -33 4389.04 548.114   3 
  -2  -3  33 3244.69 495.841   2 
  -2  -3 -33 3794.05 471.019   1 
  -2   3 -34 1240.74 347.038   3 
   2  -3  34 1237.00 400.958   2 
  -2  -3 -34 1177.60 440.381   3 
  -2  -3 -34 1022.04 282.918   1 
  -2  -3  34 1330.68 347.790   2 
   2  -3 -34 1577.78 496.746   3 
   2   3 -34 1240.92 413.698   3 
   2  -3  35 133.428 238.936   2 
   2   3 -35 315.164 226.844   3 
  -2  -3  35 609.902 292.098   2 
   2  -3 -35 479.730 429.282   3 
  -2   3 -35 578.449 293.349   3 
  -2  -3 -35 700.953 320.695   3 
   2  -3  36 210.514 231.443   2 
  -2  -3  36 899.416 293.453   2 
  -2   3 -36 761.753 321.944   3 
  -2  -3 -36 1169.98 489.758   3 
   2  -3 -36 897.182 466.513   3 
   2   3 -36 543.307 273.494   3 
   2  -3  37 981.895 369.821   2 
   2  -3 -37 1067.76 480.892   3 
  -2  -3  37 1046.27 327.359   2 
  -2   3 -37 1293.10 354.274   3 
  -2  -3 -37 512.366 383.516   3 
   2   3 -37 1086.09 375.652   3 
  -2   3 -38 374.704 323.758   3 
   2  -3  38 257.763 243.465   2 
   2  -3 -38-14.1642 295.406   3 
  -2  -3 -38-112.208 309.053   3 
   2   3 -38 179.017 248.532   3 
   2  -3  39 1378.70 438.998   2 
  -2  -3 -39 1198.31 459.483   3 
   2  -3 -39 1188.84 464.659   3 
   2   3 -39 823.478 307.117   3 
  -2  -3 -40-72.4085 279.663   3 
   2   3 -40 1510.97 432.639   3 
   2  -3 -40 784.619 433.576   3 
   2  -3  40 746.152 350.219   2 
   2  -3 -41 1095.41 443.956   3 
   2  -3  41 937.230 381.025   2 
  -2  -3 -41 939.250 457.144   3 
  -2  -3 -42 614.003 393.706   3 
   2  -3 -42 94.7139 319.809   3 
  -2  -3 -43 894.971 445.870   3 
   2  -4   0 160508. 1849.08   3 
   2   4   0 164513. 2382.94   2 
  -2  -4   0 165492. 2386.25   2 
   2   4   0 165608. 2020.46   3 
   2  -4   0 167359. 2200.76   1 
   2  -4   0 172775. 2208.26   2 
   2   4  -1 155976. 2338.80   2 
   2   4   1 150142. 2003.66   3 
   2   4  -1 150933. 1888.49   3 
  -2  -4  -1 152401. 2274.57   2 
   2  -4   1 155320. 2165.76   1 
   2  -4  -1 152018. 2045.26   1 
  -2  -4   1 155718. 2337.20   2 
   2  -4  -1 149254. 1857.40   3 
   2  -4   1 150114. 1720.50   3 
   2  -4   1 154493. 2125.56   2 
   2   4   1 152159. 2276.01   2 
   2  -4  -1 150021. 2008.80   2 
   2   4   2 688.668 264.136   2 
   2  -4  -2 844.325 262.208   3 
   2   4   2 906.039 262.377   3 
  -2  -4  -2 652.553 287.434   2 
   2  -4  -2 2877.27 412.511   1 
   2   4  -2 620.003 229.526   2 
   2  -4   2 2386.17 405.337   1 
  -2  -4   2 626.748 319.889   2 
   2  -4  -2 981.034 469.367   2 
   2  -4   3 156301. 2228.89   2 
   2   4  -3 164772. 2472.15   2 
   2   4   3 159162. 2311.36   2 
  -2  -4   3 160750. 2412.90   2 
   2   4   3 163674. 2172.49   3 
  -2  -4  -3 159565. 2291.86   2 
   2  -4  -3 158807. 2063.80   3 
   2  -4   3 160841. 2300.49   1 
   2  -4  -3 162827. 1941.21   2 
   2  -4  -3 156974. 1960.14   1 
   2   4  -4 2715.33 370.496   2 
  -2  -4   4 2888.49 435.526   2 
   2  -4  -4 2693.79 366.699   3 
  -2  -4  -4 3200.95 401.837   2 
   2  -4   4 3970.31 500.154   1 
   2  -4  -4 4872.72 431.384   1 
   2   4   4 2772.61 343.981   2 
   2   4   4 3575.08 378.016   3 
   2  -4  -4 2900.67 314.769   2 
   2   4   5 119388. 1986.37   2 
  -2  -4  -5 114685. 1874.76   3 
   2   4  -5 119120. 2131.27   2 
  -2  -4   5 118159. 2104.51   2 
   2   4   5 120597. 1976.66   3 
  -2  -4  -5 119066. 1952.92   2 
   2  -4  -5 117470. 1895.89   3 
   2  -4  -5 115497. 1560.73   2 
   2  -4   5 120309. 2081.59   1 
   2  -4  -5 118807. 1600.48   1 
   2  -4   5 121967. 2062.16   2 
   2   4   6 112680. 1994.75   3 
  -2  -4  -6 114455. 1899.29   2 
  -2  -4  -6 109488. 1900.08   3 
  -2  -4   6 109634. 2045.75   2 
   2   4   6 117447. 1958.67   2 
   2  -4  -6 111390. 1906.90   3 
   2  -4   6 115703. 2079.00   1 
   2   4  -6 114679. 2118.66   2 
   2  -4  -6 113262. 1506.29   1 
   2  -4   6 122532. 2108.48   2 
   2  -4  -6 112047. 1471.54   2 
   2   4  -7 37958.3 1227.81   2 
  -2  -4  -7 36594.7 1095.45   2 
   2   4   7 38557.9 1122.70   2 
  -2  -4   7 36364.7 1223.96   2 
   2  -4  -7 38866.3 1181.16   3 
   2   4   7 37452.9 1182.14   3 
   2  -4   7 38818.1 1241.40   1 
   2  -4  -7 38058.8 833.823   1 
   2  -4   7 43511.3 1322.33   2 
   2  -4  -7 37492.3 818.497   2 
  -2  -4  -7 37588.3 1152.19   3 
   2   4  -8 10493.6 682.293   2 
   2   4   8 10300.0 594.540   2 
  -2  -4   8 10398.1 682.918   2 
   2   4   8 10439.6 654.027   3 
  -2  -4  -8 10300.0 627.015   3 
   2  -4  -8 9809.14 636.564   3 
   2  -4   8 10901.4 679.901   1 
   2  -4   8 12704.4 746.123   2 
   2  -4  -8 10511.4 408.760   2 
  -2   4   8 10413.7 634.987   3 
  -2  -4  -8 11257.8 635.419   1 
   2  -4  -8 10914.3 434.433   1 
  -2  -4  -9 457.532 208.315   1 
   2  -4  -9 338.306 114.856   2 
  -2  -4  -9 398.681 279.818   3 
   2   4  -9 266.919 198.305   2 
  -2   4   9 277.778 213.102   3 
   2   4   9 461.917 180.026   2 
   2  -4  -9 644.776 134.405   1 
   2  -4  -9 491.061 306.464   3 
   2   4   9 293.453 202.307   3 
   2  -4   9 428.320 223.650   1 
   2  -4   9 764.566 344.511   2 
  -2  -4   9 664.335 306.794   2 
   2   4 -10 9643.44 661.828   2 
   2  -4 -10 9694.49 650.681   3 
  -2  -4 -10 8733.41 625.287   3 
   2  -4  10 9170.16 336.758   3 
   2  -4 -10 9423.48 353.524   1 
   2   4  10 8574.09 537.276   2 
   2  -4  10 9009.91 634.317   1 
   2   4  10 8853.45 630.310   3 
  -2   4  10 9046.13 612.163   3 
  -2  -4  10 9668.35 661.010   2 
   2  -4  10 9655.89 652.957   2 
  -2  -4 -10 9398.25 589.599   1 
   2  -4 -10 9355.00 341.761   2 
  -2  -4 -11 1032.35 252.265   1 
   2   4 -11 851.839 235.503   2 
   2  -4 -11 880.384 113.195   2 
   2  -4 -11 1024.01 121.679   1 
   2  -4 -11 677.766 273.581   3 
   2   4  11 1338.47 298.706   3 
  -2  -4 -11 1053.79 333.673   3 
  -2  -4  11 736.747 331.950   2 
   2  -4  11 749.886 220.085   1 
  -2   4  11 893.551 212.344   3 
   2  -4  11 750.262 123.536   3 
   2   4  11 856.421 190.207   2 
   2  -4  11 697.796 279.731   2 
   2  -4 -12 1907.19 142.336   1 
  -2  -4  12 2483.62 448.960   2 
   2  -4 -12 2005.68 133.743   2 
  -2  -4 -12 1942.23 306.149   1 
   2   4 -12 1893.02 322.392   2 
   2   4  12 2072.67 359.319   3 
   2  -4  12 2080.86 350.888   1 
  -2  -4 -12 2322.72 414.048   3 
   2   4  12 1951.43 288.142   2 
   2  -4 -12 1802.20 387.386   3 
   2  -4  12 1988.23 178.304   3 
  -2   4  12 2479.08 378.405   3 
   2  -4  12 2369.51 391.369   2 
   2  -4  13 14579.0 833.942   2 
   2  -4  13 13476.0 442.307   3 
   2  -4  13 12607.7 781.993   1 
   2   4  13 13532.1 680.720   2 
   2   4  13 14358.9 840.498   3 
  -2  -4  13 13055.9 784.941   2 
   2  -4 -13 11498.3 291.825   1 
  -2  -4 -13 12513.4 770.809   3 
   2  -4 -13 12822.8 810.194   3 
  -2   4  13 13598.5 809.043   3 
  -2  -4 -13 13408.9 697.104   1 
   2   4 -13 12632.8 769.618   2 
  -2  -4 -14 8578.61 571.340   1 
  -2  -4  14 8075.03 640.612   2 
   2  -4  14 8374.05 377.289   3 
   2   4  14 8825.33 687.275   3 
   2  -4  14 8129.94 640.319   1 
   2   4  14 8326.70 540.804   2 
   2  -4 -14 7707.61 640.695   3 
  -2   4  14 9251.18 697.323   3 
   2  -4  14 9083.08 683.728   2 
   2   4 -14 8699.48 646.914   2 
  -2  -4 -14 9792.21 728.741   3 
   2  -4  15 1968.89 195.688   3 
   2   4 -15 1460.40 302.881   2 
   2  -4 -15 2025.56 384.430   3 
  -2  -4  15 2282.74 410.055   2 
  -2  -4 -15 1747.16 268.525   1 
   2   4  15 1686.26 256.248   2 
   2   4 -15 1940.23 260.316   3 
  -2  -4 -15 2700.21 458.536   3 
   2  -4  15 2036.32 413.013   2 
  -2  -4  16 320.433 271.908   2 
  -2  -4 -16-8.42523 153.852   1 
   2  -4 -16-189.773 341.295   3 
   2   4 -16 144.270 207.727   2 
   2   4  16 125.667 133.974   2 
   2  -4  16 54.8900 97.3192   3 
   2   4 -16 154.232 158.384   3 
   2  -4  16 605.436 295.480   2 
  -2  -4 -17 11652.0 841.713   3 
  -2  -4  17 12969.5 844.553   2 
  -2  -4 -17 10901.4 660.087   1 
   2  -4  17 10692.0 474.786   3 
   2   4  17 10252.8 605.655   2 
   2  -4 -17 11411.0 886.834   3 
   2   4 -17 10853.7 573.806   3 
   2  -4  17 12984.9 851.956   2 
   2   4 -17 10939.1 748.937   2 
   2   4 -18 20544.6 1040.28   2 
  -2  -4  18 20224.7 1020.55   2 
   2   4 -18 21399.8 812.056   3 
   2  -4  18 20230.9 679.013   3 
   2  -4 -18 22291.3 1141.13   3 
   2   4  18 21312.2 871.024   2 
  -2  -4 -18 21753.3 1101.84   3 
   2  -4  18 20638.1 1089.33   2 
  -2  -4 -18 20770.9 901.285   1 
   2  -4  19 182.731 139.552   3 
   2   4 -19 66.4301 147.694   3 
  -2  -4 -19 905.380 440.675   3 
  -2  -4  19 836.058 338.506   2 
   2  -4 -19 616.959 377.759   3 
   2   4  19 282.311 194.710   2 
  -2  -4 -19 206.431 171.773   1 
   2  -4  19 1042.15 395.102   2 
   2  -4 -20 7090.50 735.535   3 
   2  -4  20 6572.19 441.344   3 
   2   4 -20 7616.70 517.510   3 
  -2  -4  20 7355.05 640.726   2 
  -2  -4 -20 6987.80 541.554   1 
  -2  -4 -20 7810.36 710.579   3 
   2   4  20 7200.85 524.017   2 
   2  -4  20 7598.88 691.002   2 
   2  -4  21 5702.98 423.241   3 
   2   4 -21 6428.77 493.028   3 
  -2  -4  21 5890.95 611.540   2 
   2   4  21 6581.29 500.417   2 
   2  -4 -21 6533.69 690.841   3 
  -2  -4 -21 7686.48 720.461   3 
   2  -4  21 6724.50 680.510   2 
  -2  -4 -21 6363.63 528.313   1 
  -2  -4 -22 1313.09 402.388   3 
   2  -4 -22 415.799 315.417   3 
  -2  -4  22 1297.56 365.742   2 
   2  -4  22 552.716 177.945   3 
   2   4 -22 621.565 213.255   3 
   2   4  22 401.474 202.583   2 
  -2  -4 -22 670.153 227.752   1 
   2  -4  22 1051.01 376.874   2 
  -2  -4 -23-144.128 146.996   1 
  -2  -4 -23 327.695 333.298   3 
   2  -4 -23 642.748 297.029   3 
   2  -4  23 211.344 142.212   3 
  -2  -4  23 554.763 284.721   2 
   2   4 -23 57.3359 149.178   3 
   2   4  23 138.962 129.365   2 
   2  -4  23-8.74259 231.564   2 
   2  -4  24 186.190 233.733   2 
   2  -4 -24-112.053 286.239   3 
  -2  -4 -24 319.654 203.563   1 
  -2  -4  24 436.920 319.611   2 
  -2  -4 -24 732.646 423.841   3 
   2  -4  24 48.2263 124.828   3 
   2   4  24 211.618 179.207   2 
   2   4 -24 46.2022 181.110   3 
   2  -4 -25 10834.1 918.367   3 
  -2  -4  25 10014.6 810.414   2 
  -2  -4 -25 9745.79 678.008   1 
   2   4 -25 10356.3 689.882   3 
   2  -4  25 9564.70 601.806   3 
  -2  -4 -25 10422.3 894.980   3 
   2   4  25 10018.5 634.819   2 
   2  -4  25 10549.4 873.662   2 
   2  -4 -26 8503.24 902.357   3 
   2   4 -26 7192.21 619.171   3 
  -2  -4  26 8121.24 783.119   2 
   2  -4  26 7414.23 553.788   3 
  -2  -4 -26 9108.83 882.602   3 
  -2  -4 -26 7017.61 580.901   1 
   2   4  26 7579.50 584.747   2 
   2  -4  26 7988.50 827.292   2 
  -2  -4  27 14966.4 980.782   2 
  -2  -4 -27 15317.1 1099.99   3 
   2   4 -27 15691.6 870.999   3 
   2  -4  27 14706.8 777.633   3 
   2  -4 -27 15157.9 1130.86   3 
   2   4  27 14059.0 779.627   2 
  -2  -4 -27 15934.6 865.346   1 
   2  -4  27 14469.9 1044.07   2 
   2  -4  28 708.126 398.921   2 
   2   4 -28 910.585 312.002   3 
  -2  -4  28 1235.95 472.913   2 
  -2  -4 -28 1018.83 577.405   3 
   2  -4 -28 1401.49 602.430   3 
  -2  -4 -28 59.7766 194.154   1 
   2   4  28 432.743 297.200   2 
   2  -4  28 690.131 267.366   3 
  -2  -4 -29 19898.3 981.610   1 
  -2  -4  29 19587.2 1173.51   2 
   2   4 -29 20812.9 1045.40   3 
  -2  -4 -29 20293.5 1310.80   3 
   2  -4 -29 19570.1 1305.47   3 
   2  -4  29 20246.0 1249.49   2 
   2  -4  30 3732.40 631.885   2 
  -2  -4 -30 2717.59 425.377   1 
  -2  -4  30 3765.78 581.277   2 
  -2  -4 -30 3420.78 698.600   3 
   2   4 -30 3316.94 468.025   3 
   2  -4 -30 2980.70 650.351   3 
   2   4 -31 7932.91 682.051   3 
  -2  -4  31 7064.51 725.756   2 
  -2  -4 -31 7922.04 645.344   1 
  -2  -4 -31 8074.43 866.561   3 
   2  -4  31 7198.74 780.749   2 
   2  -4 -31 7835.49 881.550   3 
   2  -4  32 1384.62 416.010   2 
   2   4 -32 1702.14 358.965   3 
  -2  -4 -32 1389.20 314.439   1 
  -2  -4 -32 1544.58 514.085   3 
   2  -4 -32 1456.08 496.330   3 
  -2  -4  32 2064.77 466.626   2 
   2  -4  33 3662.42 647.010   2 
   2   4 -33 3675.54 507.077   3 
   2  -4 -33 3658.28 670.017   3 
  -2  -4  33 3528.21 563.898   2 
  -2  -4 -33 3657.98 625.495   3 
  -2  -4 -33 3581.96 456.412   1 
   2  -4  34 924.886 370.638   2 
  -2  -4 -34 1033.59 419.521   3 
  -2  -4  34 624.958 341.235   2 
   2   4 -34 737.533 276.221   3 
   2  -4 -34 1596.24 532.377   3 
   2  -4  35 594.095 255.970   2 
   2   4 -35 1147.05 337.556   3 
  -2  -4  35 723.445 287.160   2 
   2  -4 -35 1562.32 534.428   3 
  -2  -4 -35 261.913 326.973   3 
   2  -4  36-26.5857 273.676   2 
   2  -4 -36 467.476 358.542   3 
  -2  -4 -36 147.061 291.190   3 
  -2  -4  36 300.864 227.969   2 
   2   4 -36 295.043 211.092   3 
  -2  -4 -37 547.824 369.626   3 
  -2  -4  37 508.973 297.284   2 
   2  -4  37 362.009 254.840   2 
   2  -4 -37 941.445 485.718   3 
  -2  -4 -38 2160.57 564.963   3 
  -2  -4  38 2005.55 475.886   2 
   2  -4 -38 2703.73 617.195   3 
   2  -4  38 2129.96 519.341   2 
  -2  -4 -39 5589.54 861.875   3 
   2  -4  39 4504.64 722.528   2 
   2  -4 -39 6058.85 884.476   3 
   2  -4  40 374.881 320.183   2 
   2  -4 -40 815.818 488.535   3 
  -2  -4 -40 1108.69 552.597   3 
  -2  -4 -41 640.549 387.119   3 
   2  -4  41 860.686 441.904   2 
   2  -4 -41 839.766 507.769   3 
   2  -4  42-154.575 270.976   2 
  -2  -5   0 8353.30 624.146   2 
   2  -5   0 8168.78 552.344   1 
   2   5   0 7765.32 576.879   2 
   2  -5   0 7973.08 464.125   3 
   2   5   0 7716.67 492.833   3 
   2  -5   0 8382.73 568.779   2 
   2  -5   1 18395.3 830.044   1 
   2  -5   1 18200.6 808.942   2 
   2  -5  -1 18723.7 781.379   2 
   2   5  -1 18901.6 894.600   2 
   2  -5  -1 18173.4 781.605   1 
   2   5   1 17859.0 849.299   2 
   2  -5  -1 19367.9 745.247   3 
   2   5  -1 18756.5 718.692   3 
   2  -5   1 17954.5 631.584   3 
   2   5   1 17245.6 726.640   3 
  -2  -5  -1 18855.1 891.344   2 
  -2  -5   1 18857.7 904.747   2 
   2  -5   2 362.370 259.367   2 
   2  -5  -2 465.996 206.571   1 
   2   5  -2-120.028 207.272   2 
   2   5   2 425.449 198.098   3 
   2  -5  -2 493.755 237.132   2 
  -2  -5   2 290.819 271.132   2 
  -2  -5  -2 73.4525 220.202   2 
   2  -5   2-204.410 137.780   3 
   2  -5   2 417.918 221.638   1 
   2  -5  -2 486.078 288.669   3 
   2   5   2 379.738 222.306   2 
   2   5  -2 193.316 158.093   3 
   2  -5   3 13808.8 751.524   1 
   2   5  -3 14299.8 798.082   2 
   2  -5  -3 13760.1 668.756   3 
   2   5   3 14491.1 766.076   2 
   2  -5  -3 14641.8 686.274   1 
  -2  -5   3 14799.2 811.659   2 
   2   5   3 13872.3 686.663   3 
  -2  -5  -3 15005.5 781.894   2 
   2  -5   3 14694.1 528.029   3 
   2   5  -3 14016.1 603.167   3 
   2  -5   3 15104.7 772.883   2 
   2  -5  -3 14020.3 654.747   2 
   2  -5   4 12308.5 713.352   1 
   2  -5  -4 12182.9 603.197   1 
   2   5   4 11242.8 675.964   2 
  -2  -5   4 12016.4 748.004   2 
   2   5  -4 11240.4 528.305   3 
   2   5   4 11578.6 648.272   3 
   2  -5  -4 11339.1 615.195   3 
  -2  -5  -4 11717.2 689.068   2 
   2   5  -4 11749.8 741.662   2 
   2  -5   4 11890.4 458.304   3 
   2  -5   4 12479.0 728.798   2 
   2  -5  -4 11816.4 585.714   2 
   2  -5  -5 3278.81 327.142   2 
   2   5   5 3164.07 372.943   2 
  -2  -5  -5 3416.41 403.434   2 
   2  -5  -5 3563.85 340.212   1 
   2   5  -5 3434.88 430.983   2 
  -2  -5   5 2797.22 417.767   2 
   2   5   5 3341.63 381.621   3 
   2  -5   5 3575.46 423.618   1 
   2  -5   5 3246.83 249.374   3 
   2  -5  -5 3191.69 402.155   3 
  -2  -5  -5 3489.89 415.305   3 
   2  -5   5 3823.67 473.715   2 
   2   5  -6 10951.4 728.311   2 
   2  -5  -6 11298.4 559.915   1 
  -2  -5   6 10575.0 709.337   2 
   2   5   6 11962.8 690.908   2 
  -2  -5  -6 10717.9 661.471   3 
   2   5   6 11603.8 682.018   3 
  -2  -5  -6 11620.6 675.372   2 
   2  -5  -6 11425.4 551.022   2 
   2  -5   6 11807.4 400.275   3 
   2  -5   6 12381.0 776.392   2 
   2  -5  -6 11639.1 703.129   3 
   2  -5   6 11804.0 746.334   1 
   2   5   7 30679.9 1077.42   2 
   2   5  -7 29468.4 1193.82   2 
   2  -5  -7 30325.9 874.815   1 
  -2  -5  -7 30924.7 1079.27   2 
  -2  -5  -7 31811.8 1132.25   3 
  -2   5   7 30547.6 1072.19   3 
   2  -5   7 30648.9 612.443   3 
  -2  -5   7 29968.7 1191.21   2 
   2   5   7 31974.3 1138.94   3 
   2  -5  -7 29572.0 1076.97   3 
   2  -5   7 31149.4 1171.44   2 
   2  -5  -7 29610.5 838.787   2 
   2  -5   7 30401.8 1199.26   1 
   2   5  -8 5394.82 540.471   2 
  -2  -5   8 5634.94 574.219   2 
   2   5   8 6406.73 495.621   2 
  -2  -5  -8 6193.04 542.878   3 
   2   5   8 6241.92 533.810   3 
   2  -5  -8 7331.52 655.594   3 
  -2  -5  -8 6185.26 516.717   2 
  -2   5   8 6293.50 536.416   3 
   2  -5   8 8385.96 697.695   2 
   2  -5   8 6563.58 584.133   1 
   2  -5  -8 6200.59 380.709   2 
   2  -5  -8 6355.27 408.876   1 
   2  -5  -9 21149.3 659.447   2 
   2   5  -9 20222.9 1005.91   2 
   2  -5  -9 20319.3 668.710   1 
  -2  -5   9 19847.3 992.946   2 
  -2   5   9 21209.5 948.033   3 
   2   5   9 20344.0 886.473   2 
  -2  -5  -9 20341.9 933.814   3 
   2   5   9 19718.0 948.518   3 
   2  -5  -9 20165.8 923.749   3 
  -2  -5  -9 20603.6 868.800   2 
   2  -5   9 20636.5 995.013   1 
   2  -5   9 21576.3 1013.86   2 
   2   5 -10 1340.69 300.654   2 
   2  -5  10 1579.68 344.393   1 
   2  -5 -10 1463.03 192.621   2 
   2  -5  10 862.446 58.9625   3 
  -2  -5  10 1218.81 322.543   2 
   2  -5 -10 1545.03 204.012   1 
   2   5  10 1366.73 297.231   3 
  -2   5  10 1756.29 353.165   3 
   2   5  10 1837.20 299.129   2 
   2  -5 -10 1697.95 380.577   3 
  -2  -5 -10 1337.98 296.001   1 
  -2  -5 -10 1442.02 389.360   3 
   2  -5  10 2790.06 471.681   2 
  -2  -5 -11 1363.27 275.531   1 
   2  -5  11 1179.52 272.236   1 
   2   5 -11 1398.88 308.559   2 
   2  -5 -11 1499.84 365.420   3 
   2  -5 -11 1521.43 182.732   2 
  -2  -5 -11 1730.53 358.268   3 
   2  -5 -11 1402.78 176.539   1 
   2  -5  11 1142.56 107.102   3 
   2   5  11 1204.67 245.549   2 
   2   5  11 1757.43 323.935   3 
  -2  -5  11 1128.63 315.550   2 
  -2   5  11 1288.30 321.798   3 
   2  -5  11 1667.92 392.549   2 
   2   5  12 6536.39 590.803   3 
   2  -5 -12 6329.82 317.642   2 
  -2  -5  12 7469.34 682.360   2 
   2  -5  12 5842.25 239.123   3 
   2  -5 -12 5963.29 586.054   3 
  -2  -5 -12 6323.99 521.503   1 
   2   5  12 6644.91 533.621   2 
  -2  -5 -12 6419.33 607.889   3 
  -2   5  12 7332.48 607.882   3 
   2   5 -12 6623.57 606.151   2 
   2  -5 -12 6079.41 331.976   1 
   2  -5  12 7123.16 687.543   2 
   2  -5  13 20356.6 446.569   3 
  -2  -5  13 21510.1 1056.02   2 
   2  -5 -13 21105.2 567.951   1 
   2  -5 -13 21119.5 508.528   2 
  -2  -5 -13 22087.3 957.791   1 
   2  -5  13 22147.6 1105.42   2 
   2   5  13 21723.6 910.312   2 
   2  -5 -13 20732.4 1041.53   3 
  -2  -5 -13 21834.4 1043.19   3 
   2  -5  14 1174.14 120.898   3 
  -2  -5 -14 1176.42 275.828   1 
  -2  -5  14 1232.62 371.263   2 
  -2  -5 -14 2127.90 451.388   3 
   2  -5 -14 649.838 49.8283   2 
   2  -5 -14 1222.32 383.555   3 
   2  -5 -14 1196.08 134.309   1 
   2   5  14 1076.92 266.215   2 
   2  -5  14 1842.36 428.072   2 
   2  -5  15 1059.02 122.392   3 
   2  -5 -15 1124.45 385.788   3 
   2  -5  15 1131.14 329.734   2 
  -2  -5 -15 1327.62 270.587   1 
  -2  -5 -15 1014.27 276.427   3 
  -2  -5  15 875.984 325.963   2 
   2  -5 -15 1021.23 112.329   1 
   2   5  15 1005.48 211.978   2 
   2   5 -15 1169.17 189.173   3 
   2  -5  16 536.929 259.706   2 
   2  -5 -16 738.608 84.4070   1 
   2  -5  16 950.813 124.583   3 
  -2  -5  16 469.074 258.487   2 
   2   5  16 968.381 239.820   2 
  -2  -5 -16 970.615 245.746   1 
  -2  -5 -16 766.321 296.559   3 
   2  -5 -16 705.335 82.8541   1 
   2  -5 -16 870.255 351.643   3 
   2   5 -16 868.111 189.494   3 
   2  -5  17-94.3803 223.475   2 
  -2  -5 -17-109.625 169.247   1 
   2  -5 -17 224.221 345.233   3 
   2   5  17 200.096 163.882   2 
   2  -5  17 163.196 93.2855   3 
   2   5 -17 105.928 123.414   3 
  -2  -5 -17 707.155 332.316   3 
  -2  -5  17 572.925 335.994   2 
   2   5 -18 5216.59 401.148   3 
   2   5  18 5039.71 485.327   2 
  -2  -5 -18 5316.78 496.054   1 
  -2  -5 -18 5881.54 736.891   3 
   2  -5 -18 5630.62 766.511   3 
   2  -5  18 5415.49 310.286   3 
   2  -5  18 7841.90 805.843   2 
   2  -5  19 43546.9 885.356   3 
  -2  -5 -19 44003.1 1361.27   1 
  -2  -5  19 43784.4 1627.82   2 
  -2  -5 -19 44239.1 1645.25   3 
   2   5  19 44537.3 1307.30   2 
   2  -5 -19 43324.3 1689.70   3 
   2   5 -19 45715.7 1143.67   3 
   2  -5  19 43419.4 1672.16   2 
   2  -5  20 6529.76 756.559   2 
  -2  -5  20 6216.14 719.224   2 
  -2  -5 -20 4480.93 449.967   1 
  -2  -5 -20 6810.94 801.372   3 
   2   5  20 4200.16 444.381   2 
   2   5 -20 4277.31 385.730   3 
   2  -5  20 4700.89 332.646   3 
   2  -5 -20 4630.34 702.395   3 
  -2  -5  21 4320.31 623.561   2 
  -2  -5 -21 4664.76 683.336   3 
   2  -5  21 3852.44 585.149   2 
   2  -5  21 3312.32 288.406   3 
   2   5  21 3279.36 390.544   2 
   2   5 -21 3292.80 361.350   3 
   2  -5 -21 4275.14 670.196   3 
  -2  -5 -21 3180.51 403.256   1 
   2  -5  22 19307.0 669.670   3 
   2  -5 -22 19362.5 1202.42   3 
  -2  -5  22 20642.4 1145.35   2 
  -2  -5 -22 17847.8 890.019   1 
   2   5  22 19187.0 877.261   2 
   2   5 -22 17847.5 798.860   3 
  -2  -5 -22 18672.6 1160.07   3 
   2  -5  22 20272.5 1215.41   2 
  -2  -5 -23 10088.4 887.525   3 
   2  -5  23 9264.62 493.290   3 
  -2  -5  23 9480.32 795.354   2 
  -2  -5 -23 8722.46 636.781   1 
   2   5  23 9260.68 626.880   2 
   2   5 -23 9672.02 601.296   3 
   2  -5  23 9698.81 880.860   2 
   2  -5 -23 9385.31 870.719   3 
   2  -5  24 2740.37 522.125   2 
   2   5 -24 2217.58 327.156   3 
  -2  -5  24 1892.93 409.424   2 
   2   5  24 2209.29 328.892   2 
   2  -5 -24 1904.46 453.781   3 
   2  -5  24 2772.07 300.078   3 
  -2  -5 -24 2604.14 531.612   3 
  -2  -5 -24 1870.58 291.790   1 
  -2  -5 -25-228.496 202.475   1 
  -2  -5 -25 127.876 227.347   3 
   2  -5 -25 343.891 293.831   3 
  -2  -5  25 256.993 285.824   2 
   2  -5  25 312.487 277.344   2 
   2   5 -25 196.496 160.798   3 
   2  -5  25 171.718 144.132   3 
   2   5  25-51.0842 122.437   2 
   2  -5  26 328.248 356.885   2 
  -2  -5 -26-103.632 211.006   1 
  -2  -5  26 253.974 332.407   2 
  -2  -5 -26 402.578 379.991   3 
   2  -5 -26 1049.33 499.688   3 
   2   5  26 236.876 193.101   2 
   2  -5  26 515.269 190.162   3 
   2   5 -26-18.4477 160.272   3 
   2   5 -27 13262.6 761.170   3 
  -2  -5  27 12238.2 957.539   2 
  -2  -5 -27 13537.5 1056.50   3 
  -2  -5 -27 13845.9 815.291   1 
   2  -5 -27 14835.0 1131.89   3 
   2   5  27 13170.9 742.585   2 
   2  -5  27 12902.4 1032.34   2 
   2  -5  28 1030.75 392.191   2 
  -2  -5  28 323.237 273.829   2 
  -2  -5 -28 730.486 473.567   3 
   2   5 -28 264.005 217.700   3 
   2  -5 -28 511.052 410.305   3 
  -2  -5 -28 68.3484 153.435   1 
   2  -5  29 3017.65 534.936   2 
   2   5 -29 3040.04 393.224   3 
  -2  -5 -29 3917.17 656.155   3 
  -2  -5 -29 2649.41 370.341   1 
   2  -5 -29 3215.00 558.700   3 
  -2  -5  29 2742.90 474.370   2 
  -2  -5 -30 703.581 437.646   3 
   2  -5  30 434.312 303.071   2 
  -2  -5  30-399.179 302.135   2 
  -2  -5 -30-143.501 158.091   1 
   2   5 -30 155.184 171.857   3 
   2  -5 -30-71.1853 294.305   3 
   2  -5  31 265.796 235.087   2 
  -2  -5 -31 903.071 486.869   3 
   2  -5 -31 1324.87 494.497   3 
   2   5 -31 627.307 242.238   3 
  -2  -5  31-154.282 311.395   2 
  -2  -5 -31 508.021 227.897   1 
   2  -5  32 1527.49 416.943   2 
  -2  -5  32 2138.06 467.320   2 
   2   5 -32 1930.82 361.714   3 
  -2  -5 -32 2515.23 560.693   3 
   2  -5 -32 2254.39 584.088   3 
   2  -5  33 644.927 355.189   2 
  -2  -5 -33 1796.71 515.909   3 
  -2  -5  33 1311.46 372.675   2 
   2   5 -33 1686.75 351.115   3 
   2  -5 -33 1179.93 496.320   3 
   2  -5  34 1497.56 438.247   2 
  -2  -5  34 2020.68 485.128   2 
  -2  -5 -34 1471.45 465.009   3 
   2  -5 -34 2572.78 580.639   3 
   2  -5  35-163.792 315.806   2 
  -2  -5 -35 390.789 402.074   3 
  -2  -5  35-30.4697 251.504   2 
   2  -5 -35 359.399 424.588   3 
  -2  -5  36 1944.80 474.124   2 
  -2  -5 -36 1833.98 578.261   3 
   2  -5  36 1797.36 481.655   2 
   2  -5 -36 1628.34 506.719   3 
   2  -5 -37 23.1519 302.674   3 
  -2  -5 -37 99.5995 347.906   3 
  -2  -5  37-119.977 246.652   2 
   2  -5  37 205.064 293.839   2 
   2  -5  38 398.926 345.525   2 
  -2  -5  38 669.721 368.886   2 
   2  -5 -38-260.833 299.019   3 
  -2  -5 -38 214.138 331.442   3 
   2  -5  39 671.050 400.547   2 
  -2  -5 -39 1839.65 593.998   3 
  -2  -5  39 845.484 350.475   2 
   2  -5 -39 826.918 390.717   3 
   2  -5  40 35.8076 278.854   2 
  -2  -5 -40 580.203 430.676   3 
   2  -5  41 813.183 379.726   2 
   2  -5  42 568.367 344.979   2 
   2   6   0 40266.9 1142.84   3 
   2   6   0 39969.2 1397.02   2 
   2  -6   0 37908.5 1238.99   2 
  -2  -6   0 39313.8 1369.47   2 
   2  -6   0 38782.4 1006.79   3 
   2  -6   0 39724.8 1306.62   1 
   2   6  -1 15812.1 900.007   2 
   2   6   1 14601.9 871.806   2 
   2  -6   1 15652.2 679.393   3 
  -2  -6   1 15518.2 910.071   2 
   2  -6  -1 16538.5 832.461   1 
   2  -6   1 17004.9 877.458   1 
   2   6  -1 14810.5 691.097   3 
   2  -6  -1 16219.2 739.247   3 
   2  -6   1 13445.7 757.924   2 
  -2  -6  -1 15813.3 895.463   2 
   2  -6  -1 14386.8 813.823   2 
   2   6   1 14635.2 737.409   3 
   2  -6  -2 74571.1 1715.21   1 
   2   6  -2 72936.5 1921.44   2 
   2   6   2 75567.6 1890.07   2 
  -2  -6   2 77475.7 1931.57   2 
   2  -6   2 74512.2 1839.74   1 
   2  -6  -2 72648.3 1496.89   3 
   2   6  -2 74148.8 1475.89   3 
   2  -6   2 73743.1 1281.09   3 
  -2  -6  -2 75563.6 1867.34   2 
   2  -6   2 74281.3 1780.40   2 
   2  -6  -2 76679.2 1694.79   2 
   2   6   2 75471.3 1635.20   3 
   2  -6  -3 4026.56 476.047   2 
  -2  -6  -3 2365.71 387.153   2 
   2   6  -3 2884.34 443.216   2 
   2  -6   3 3092.47 447.344   1 
   2   6   3 2460.20 394.072   2 
   2   6  -3 2586.51 303.647   3 
  -2  -6   3 3217.38 464.723   2 
   2   6   3 2644.97 355.578   3 
   2  -6  -3 4533.93 528.942   3 
   2  -6   3 3114.62 323.610   3 
   2  -6  -3 2598.06 379.409   1 
   2  -6   3 4479.05 559.951   2 
   2   6   4 2869.95 390.955   3 
   2  -6  -4 3037.07 368.203   2 
   2   6  -4 2754.98 396.902   2 
   2  -6   4 3304.50 433.214   1 
  -2  -6  -4 2382.28 404.460   2 
  -2  -6   4 3332.29 467.086   2 
   2  -6  -4 3045.00 389.685   1 
   2  -6  -4 3120.32 419.764   3 
   2  -6   4 3315.61 309.012   3 
   2   6   4 2467.40 371.433   2 
   2  -6   4 3435.34 495.855   2 
   2   6  -4 2580.76 291.225   3 
   2   6  -5 36568.9 1383.01   2 
   2   6   5 36542.2 1225.22   3 
   2  -6   5 38078.6 1355.41   1 
   2   6   5 35515.6 1270.09   2 
   2   6  -5 35161.5 943.308   3 
  -2  -6   5 34392.3 1323.25   2 
   2  -6  -5 36293.4 1163.44   3 
   2  -6  -5 36793.8 1126.19   1 
  -2  -6  -5 36810.1 1274.43   2 
  -2  -6  -5 33670.0 1142.59   3 
   2  -6   5 36012.5 778.519   3 
   2  -6   5 37696.4 1338.23   2 
   2  -6  -5 35531.5 1088.28   2 
   2   6  -6 12759.0 554.115   3 
   2  -6   6 13588.8 855.912   1 
   2   6   6 11542.8 740.608   2 
  -2  -6   6 12369.8 832.318   2 
   2  -6  -6 13659.9 676.160   1 
  -2  -6  -6 13112.2 773.297   2 
   2  -6  -6 13973.3 792.798   3 
   2  -6   6 13430.6 459.477   3 
  -2   6   6 12835.0 718.101   3 
  -2  -6  -6 12608.6 735.250   3 
   2   6   6 12481.6 756.494   3 
   2  -6   6 14118.8 878.940   2 
   2  -6  -6 13057.8 651.601   2 
   2  -6  -7 12909.7 633.300   2 
   2  -6   7 13274.6 841.797   1 
   2   6  -7 12593.4 543.049   3 
   2   6   7 14025.4 798.790   2 
   2  -6  -7 13288.7 787.917   3 
  -2  -6   7 12691.2 852.071   2 
   2   6   7 13851.6 780.135   3 
   2  -6   7 13426.7 415.448   3 
  -2  -6  -7 13681.8 775.517   3 
  -2  -6  -7 13446.2 780.327   2 
  -2   6   7 12597.3 735.870   3 
   2  -6   7 13916.8 861.457   2 
   2  -6  -7 13235.3 654.199   1 
   2  -6  -8 15104.4 656.183   2 
  -2  -6  -8 15136.7 846.634   3 
  -2  -6   8 14936.8 935.270   2 
   2   6   8 14548.1 804.407   2 
   2   6   8 15794.1 855.048   3 
   2   6  -8 15180.0 570.014   3 
   2  -6  -8 16205.4 697.605   1 
   2  -6  -8 16489.2 891.233   3 
   2  -6   8 14922.1 398.599   3 
  -2   6   8 16132.0 852.458   3 
  -2  -6  -8 15988.5 840.038   2 
   2  -6   8 16882.0 965.041   2 
   2  -6  -9 15686.2 662.971   2 
   2  -6   9 14825.8 349.602   3 
  -2  -6   9 15711.4 944.296   2 
   2   6   9 15374.4 826.013   2 
  -2  -6  -9 16372.8 880.630   3 
   2   6   9 15980.0 894.586   3 
   2  -6  -9 15745.4 683.504   1 
   2  -6  -9 15924.6 867.709   3 
  -2   6   9 16713.0 879.826   3 
   2  -6   9 16649.5 959.677   2 
  -2  -6  -9 16427.9 835.830   2 
   2  -6 -10 139.932 117.675   1 
   2  -6  10 1497.00 404.974   2 
   2   6  10 28.7264 179.493   3 
   2  -6 -10 463.987 171.009   2 
  -2  -6 -10 1464.81 445.308   3 
   2   6  10 161.651 189.498   2 
  -2   6  10 115.521 185.224   3 
  -2  -6 -10-16.2172 184.553   2 
   2  -6 -10 93.0367 285.329   3 
  -2  -6  10 9.47658 279.908   2 
   2  -6  11 30.6018 239.870   2 
   2  -6 -11 239.649 170.404   2 
  -2  -6  11 175.929 268.263   2 
   2  -6 -11 8.48137 112.301   1 
   2  -6 -11 22.2444 226.011   3 
   2   6  11 111.448 187.196   2 
  -2  -6 -11-40.2496 166.679   2 
   2  -6  12 910.575 357.096   2 
   2  -6 -12 1036.08 182.677   1 
  -2  -6  12 1012.73 346.353   2 
   2  -6 -12 995.934 194.759   2 
   2   6  12 919.992 242.747   2 
  -2  -6 -12 911.499 235.777   1 
   2  -6 -12 819.521 306.149   3 
  -2  -6 -12 715.046 302.562   3 
   2  -6 -13 6807.32 403.367   1 
  -2  -6  13 7188.98 681.139   2 
   2  -6 -13 7765.57 687.224   3 
   2  -6 -13 6658.50 370.185   2 
   2   6  13 6961.73 564.847   2 
  -2  -6 -13 6970.26 645.697   3 
  -2  -6 -13 6989.19 568.725   1 
   2  -6  13 8052.65 722.125   2 
   2  -6 -14 10228.3 461.625   1 
  -2  -6  14 9371.27 796.852   2 
   2   6  14 9635.52 641.287   2 
   2  -6 -14 8731.29 380.868   2 
  -2  -6 -14 10276.8 774.977   3 
  -2  -6 -14 9628.65 680.346   1 
   2  -6  14 9497.72 775.731   2 
   2  -6 -14 9292.87 765.713   3 
   2  -6  15 264.003 269.380   2 
   2  -6 -15 287.201 102.970   1 
  -2  -6  15 327.113 286.178   2 
  -2  -6 -15 354.585 280.612   3 
  -2  -6 -15 97.2152 161.678   1 
   2   6  15 504.074 196.592   2 
   2  -6 -15-145.387 133.836   2 
   2  -6 -15 193.864 263.473   3 
   2  -6  16 282.044 275.726   2 
  -2  -6 -16 767.055 239.895   1 
   2  -6 -16 721.226 127.538   1 
  -2  -6  16 659.726 302.021   2 
  -2  -6 -16 420.391 294.464   3 
   2   6  16 598.984 208.334   2 
   2  -6 -16 711.830 105.806   2 
   2  -6 -16 318.699 281.922   3 
   2   6 -16 689.464 156.921   3 
   2   6 -17 92.3046 97.7996   3 
   2  -6 -17-33.8339 254.400   3 
  -2  -6 -17 455.418 218.360   1 
  -2  -6  17 219.720 235.064   2 
  -2  -6 -17 277.706 308.453   3 
   2   6  17 359.030 198.658   2 
   2  -6  17 425.297 335.891   2 
   2  -6 -17 117.904 76.4525   1 
   2  -6  18 3997.86 648.944   2 
  -2  -6  18 3700.03 646.353   2 
  -2  -6 -18 1509.25 304.782   1 
   2   6  18 2603.49 401.731   2 
   2  -6 -18 1831.34 152.270   1 
   2   6 -18 2138.75 246.377   3 
   2  -6 -18 2121.99 539.221   3 
  -2  -6 -18 3919.11 722.514   3 
   2  -6 -18 1584.86 142.986   1 
  -2  -6 -19 36912.4 1319.13   1 
   2   6 -19 36183.5 946.208   3 
  -2  -6  19 36128.4 1546.47   2 
   2   6  19 34536.5 1198.55   2 
  -2  -6 -19 35176.4 1516.13   3 
   2  -6 -19 36102.3 1566.99   3 
   2  -6  19 34241.4 1563.36   2 
  -2  -6 -20 3357.48 614.375   3 
   2  -6  20 3035.14 573.361   2 
  -2  -6 -20 2060.44 335.284   1 
   2   6  20 2075.80 378.139   2 
   2  -6  20 1764.78 144.726   3 
   2  -6 -20 2260.69 567.039   3 
   2   6 -20 1636.64 253.073   3 
  -2  -6  20 3138.09 589.217   2 
   2  -6 -21 882.235 383.557   3 
   2  -6  21 1114.39 370.016   2 
  -2  -6  21 825.891 372.214   2 
   2   6 -21 755.836 190.303   3 
  -2  -6 -21 2048.61 490.045   3 
  -2  -6 -21 769.405 243.050   1 
   2   6  21 1097.43 269.690   2 
   2  -6  21 701.403 108.448   3 
   2  -6  22 5074.39 658.897   2 
   2   6  22 4857.88 466.756   2 
  -2  -6 -22 5243.30 656.888   3 
  -2  -6 -22 5576.68 542.987   1 
   2  -6  22 4709.34 259.095   3 
  -2  -6  22 4602.22 604.817   2 
   2  -6 -22 4627.36 619.825   3 
   2   6 -22 5038.22 395.422   3 
  -2  -6  23 719.121 309.454   2 
  -2  -6 -23 1231.68 287.033   1 
  -2  -6 -23 1261.13 405.874   3 
   2  -6  23 1300.78 426.922   2 
   2   6  23 1609.04 302.696   2 
   2   6 -23 849.366 220.731   3 
   2  -6 -23 1389.43 463.828   3 
   2  -6  23 1181.50 150.156   3 
   2   6 -24 2107.62 292.135   3 
  -2  -6  24 1644.51 405.388   2 
   2  -6  24 1741.35 436.602   2 
  -2  -6 -24 1566.00 450.860   3 
   2   6  24 2461.78 355.794   2 
   2  -6 -24 1524.20 417.845   3 
  -2  -6 -24 2090.68 346.766   1 
   2  -6  25 554.241 321.924   2 
  -2  -6 -25 1293.74 433.645   3 
  -2  -6  25 795.126 305.256   2 
   2  -6 -25 1108.36 384.472   3 
  -2  -6 -25 1127.16 270.220   1 
   2   6 -25 868.311 208.894   3 
   2   6  25 1347.45 278.258   2 
   2  -6  26 137.576 248.426   2 
   2  -6 -26 199.188 341.827   3 
  -2  -6 -26-108.676 196.312   1 
  -2  -6 -26 315.390 386.318   3 
   2   6 -26 189.879 139.404   3 
  -2  -6  26-202.125 282.712   2 
  -2  -6 -27 481.287 203.689   1 
   2  -6  27 47.5175 280.269   2 
  -2  -6  27 20.0044 254.005   2 
   2  -6 -27 682.544 392.265   3 
   2   6 -27 570.832 207.398   3 
  -2  -6 -27 142.667 304.747   3 
   2  -6  28 882.467 361.499   2 
  -2  -6 -28 1060.79 277.610   1 
  -2  -6 -28 1268.23 451.020   3 
   2  -6 -28 1029.34 368.975   3 
  -2  -6  28 718.667 320.204   2 
   2   6 -28 1604.84 267.988   3 
  -2  -6 -29 317.610 334.711   3 
   2  -6  29-73.7029 292.783   2 
  -2  -6 -29-123.776 176.087   1 
  -2  -6  29 125.576 266.365   2 
   2  -6 -29 488.159 376.756   3 
   2   6 -29 197.433 150.516   3 
   2  -6  30 3256.93 573.851   2 
  -2  -6 -30 3365.10 434.199   1 
  -2  -6 -30 2970.02 618.660   3 
   2  -6 -30 3716.78 718.469   3 
  -2  -6  30 2702.21 540.323   2 
  -2  -6 -31 3088.01 689.989   3 
  -2  -6  31 3226.15 596.108   2 
   2  -6  31 2917.48 604.806   2 
   2  -6 -31 3945.41 731.887   3 
   2  -6  32 5934.63 814.314   2 
  -2  -6 -32 5659.51 806.023   3 
  -2  -6  32 6046.56 773.062   2 
   2  -6 -32 6806.89 875.987   3 
   2  -6  33 1219.79 452.975   2 
  -2  -6  33 1995.69 522.128   2 
   2  -6 -33 2303.49 641.859   3 
  -2  -6 -33 2240.58 549.611   3 
   2  -6  34 836.453 346.754   2 
  -2  -6  34 1981.98 503.853   2 
  -2  -6 -34 1456.61 496.582   3 
   2  -6 -34 1913.26 604.365   3 
   2  -6  35 1139.15 485.582   2 
  -2  -6 -35 344.047 348.628   3 
   2  -6 -35 706.068 415.987   3 
  -2  -6  35 565.267 302.776   2 
   2  -6 -36 2310.51 638.074   3 
   2  -6  36 1556.57 486.487   2 
  -2  -6 -36 1121.38 497.960   3 
  -2  -6  36 1425.39 472.044   2 
  -2  -6 -37 4788.29 791.061   3 
  -2  -6  37 4797.12 718.230   2 
   2  -6  37 4703.31 790.151   2 
   2  -6 -37 5112.37 825.006   3 
   2  -6  38-15.8739 293.086   2 
  -2  -6 -38 760.544 516.961   3 
   2  -6 -38 112.333 319.301   3 
  -2  -6  39 78.7354 307.574   2 
   2  -6  39 775.383 403.970   2 
   2  -6  40 1677.65 552.176   2 
  -2  -6  40 1732.65 514.312   2 
   2  -6  41 531.696 342.857   2 
   2  -6  42 604.587 373.831   2 
   2  -6  43 986.728 451.083   2 
   2  -7   0 92632.9 1657.22   3 
   2   7   0 95004.1 1838.02   3 
   2  -7   0 96699.4 2170.48   1 
   2  -7   0 94714.7 2090.34   2 
  -2  -7   0 91869.2 2238.11   2 
   2  -7   1 12766.2 836.308   1 
  -2  -7   1 14958.3 955.313   2 
   2   7   1 13036.9 747.664   3 
   2  -7   1 13798.7 639.011   3 
   2  -7  -1 15335.1 754.974   3 
   2   7  -1 12795.3 683.415   3 
   2  -7  -1 13395.9 829.995   1 
  -2  -7  -1 14710.2 929.207   2 
   2  -7   1 13528.7 872.413   2 
   2  -7  -1 12916.4 782.698   2 
   2  -7   2 8242.59 458.065   3 
  -2  -7   2 8660.71 735.129   2 
   2  -7  -2 9729.10 611.616   3 
  -2  -7  -2 10399.0 793.192   2 
   2   7  -2 8465.92 551.906   3 
   2  -7   2 9261.15 708.635   1 
   2   7   2 8832.66 596.937   3 
   2  -7  -2 9116.60 674.166   1 
   2  -7   2 8736.43 671.794   2 
   2  -7  -2 9129.53 667.635   2 
   2  -7  -3 1583.06 355.829   2 
   2   7   3 1424.74 327.952   2 
  -2  -7   3 1631.52 355.802   2 
   2  -7   3 882.660 272.325   2 
   2   7  -3 1427.43 251.649   3 
   2   7   3 1101.57 238.794   3 
  -2  -7  -3 1033.64 296.775   2 
   2  -7   3 1191.76 167.199   3 
   2  -7  -3 1347.27 284.932   1 
   2  -7  -3 1531.45 305.054   3 
   2   7  -4 1902.45 251.865   3 
   2  -7  -4 1997.88 313.878   1 
   2  -7  -4 2110.26 326.581   3 
   2  -7   4 2126.42 380.642   2 
  -2  -7  -4 2184.43 379.095   2 
   2  -7  -4 1724.17 292.962   2 
   2   7   4 2277.96 373.628   2 
   2  -7   4 1881.94 210.199   3 
   2   7   4 2138.33 332.114   3 
  -2  -7   4 2531.43 447.039   2 
   2   7   5 3399.51 423.571   3 
   2  -7   5 3422.76 475.100   2 
   2  -7  -5 3330.69 379.375   2 
   2  -7  -5 3297.12 385.901   3 
   2   7   5 3429.33 444.311   2 
  -2  -7   5 3513.09 481.827   2 
   2  -7   5 3343.73 255.295   3 
  -2  -7  -5 2917.00 436.374   2 
   2  -7  -5 3240.76 397.192   1 
   2   7  -5 3351.40 321.002   3 
  -2  -7  -5 3555.30 428.708   3 
   2  -7   6 1163.82 375.663   2 
  -2  -7  -6 1428.70 295.446   3 
   2  -7  -6 1060.96 223.291   2 
   2   7   6 1040.57 269.699   2 
  -2  -7   6 709.153 299.490   2 
   2   7   6 1356.27 325.671   3 
  -2  -7  -6 1257.55 324.560   2 
   2  -7  -6 1280.87 325.972   3 
   2  -7   6 1034.16 126.558   3 
  -2   7   6 1373.08 299.770   3 
   2  -7  -6 1145.40 243.702   1 
   2   7  -6 878.970 175.254   3 
   2  -7  -7 11375.6 657.143   2 
   2   7   7 11456.6 773.561   2 
   2   7   7 12780.4 801.935   3 
   2  -7   7 10853.7 378.458   3 
  -2  -7  -7 12114.0 783.209   2 
   2  -7  -7 11793.0 750.920   3 
   2   7  -7 11415.2 532.791   3 
  -2   7   7 13624.5 792.741   3 
   2  -7  -7 11430.8 688.990   1 
  -2  -7   7 12230.8 875.797   2 
   2  -7   7 11322.3 821.918   2 
  -2  -7  -7 12030.8 753.414   3 
  -2  -7   8 2610.88 494.750   2 
   2  -7   8 2501.58 446.560   2 
   2  -7  -8 2343.63 293.019   2 
   2   7   8 2254.81 351.700   2 
   2   7  -8 3540.24 374.597   3 
  -2   7   8 3004.17 406.031   3 
   2  -7   8 1949.66 145.480   3 
   2  -7  -8 2465.22 342.161   1 
   2  -7  -8 2891.65 428.965   3 
  -2  -7  -8 2424.30 392.841   2 
  -2  -7  -8 2234.18 396.157   3 
   2  -7   9 1342.73 375.571   2 
   2  -7  -9 598.044 178.273   2 
   2   7   9 859.257 251.317   2 
  -2  -7  -9 1108.75 316.715   3 
   2  -7  -9 1017.18 310.139   3 
  -2  -7  -9 1078.71 316.160   2 
   2  -7  -9 934.755 230.756   1 
  -2  -7   9 857.455 335.376   2 
  -2   7   9 881.746 275.354   3 
   2  -7  10 1738.81 384.782   2 
   2  -7 -10 1992.12 308.815   2 
   2  -7 -10 1607.13 364.005   3 
   2   7 -10 1966.82 218.453   3 
  -2  -7 -10 2057.96 416.554   3 
   2  -7 -10 1533.62 258.945   1 
  -2  -7  10 1585.53 367.186   2 
   2   7  10 1665.54 327.548   2 
  -2  -7 -10 1476.67 316.711   2 
   2  -7  11 987.929 377.237   2 
   2   7  11 428.172 208.923   2 
   2  -7 -11 458.645 160.891   1 
  -2  -7  11 657.222 317.924   2 
   2   7 -11 522.480 135.800   3 
  -2  -7 -11 1131.34 397.141   3 
   2  -7 -11 1208.51 396.717   3 
  -2  -7 -11 315.704 208.120   2 
   2  -7 -11 977.836 249.305   2 
   2   7 -12 13572.9 507.893   3 
   2   7  12 13968.4 823.503   2 
   2  -7 -12 13502.2 645.375   2 
  -2  -7  12 13409.9 952.102   2 
  -2  -7 -12 13337.2 885.702   3 
   2  -7 -12 12509.7 862.585   3 
  -2  -7 -12 14009.8 807.108   2 
   2  -7 -12 13411.4 656.832   1 
   2  -7  12 13579.3 953.201   2 
   2  -7  13 1018.10 373.424   2 
   2  -7 -13 659.569 129.143   2 
  -2  -7  13 1247.69 376.704   2 
   2   7  13 816.754 255.167   2 
   2  -7 -13 840.793 181.312   1 
  -2  -7 -13 1032.27 361.254   3 
  -2  -7 -13 729.399 217.504   1 
   2  -7 -13 1612.72 438.191   3 
  -2  -7 -14 2550.51 382.828   1 
   2  -7  14 2391.39 471.664   2 
  -2  -7  14 2268.94 468.037   2 
   2  -7 -14 1482.35 120.872   2 
   2  -7 -14 2340.23 277.460   1 
  -2  -7 -14 3042.63 545.223   3 
   2   7  14 2163.81 362.670   2 
   2  -7 -14 2258.96 487.951   3 
  -2  -7  15 13157.1 968.624   2 
   2   7  15 13015.6 784.094   2 
   2  -7 -15 13474.5 605.348   1 
   2  -7 -15 12927.2 513.355   2 
   2  -7 -15 13474.3 950.317   3 
  -2  -7 -15 13669.1 857.944   1 
   2  -7  15 13122.5 982.149   2 
  -2  -7 -15 13732.6 950.867   3 
   2  -7  16 1401.93 447.777   2 
  -2  -7  16 989.509 463.845   2 
  -2  -7 -16 1120.95 285.200   1 
  -2  -7 -16 2171.00 554.769   3 
   2   7  16 766.466 276.852   2 
   2  -7 -16 378.007 77.4033   2 
   2   7 -16 700.273 144.468   3 
   2  -7 -16 1405.81 445.133   3 
   2  -7 -16 787.207 174.455   1 
  -2  -7 -17 9333.70 838.538   3 
  -2  -7  17 9359.94 862.530   2 
   2   7  17 9084.46 668.957   2 
   2  -7 -17 9422.69 858.070   3 
   2  -7 -17 9043.95 380.439   2 
   2  -7 -17 9044.55 458.843   1 
   2   7 -17 9050.83 416.261   3 
  -2  -7 -17 9270.72 707.249   1 
   2  -7  17 9677.76 881.026   2 
  -2  -7 -18 11236.3 918.548   3 
   2   7  18 11645.5 733.420   2 
   2  -7 -18 11248.5 480.522   1 
   2  -7 -18 10727.2 876.896   3 
   2   7 -18 11549.9 476.827   3 
   2  -7  18 12010.9 982.945   2 
  -2  -7 -18 11919.7 796.156   1 
  -2  -7  18 11765.1 960.897   2 
   2  -7 -19 892.043 140.693   1 
   2  -7 -19 1029.01 150.824   1 
   2  -7  19 1492.16 458.457   2 
  -2  -7 -19 700.727 258.261   1 
   2  -7 -19 607.486 335.957   3 
  -2  -7  19 1653.39 465.361   2 
  -2  -7 -19 1082.66 460.810   3 
   2   7 -19 742.208 146.240   3 
   2   7  19 1314.47 292.422   2 
   2  -7  20 4206.68 623.589   2 
  -2  -7 -20 4253.84 517.076   1 
  -2  -7 -20 4838.45 654.293   3 
   2   7  20 4559.05 475.128   2 
   2  -7 -20 3607.39 234.371   1 
   2   7 -20 4286.10 311.993   3 
  -2  -7  20 4984.25 662.231   2 
   2  -7 -20 4145.45 247.119   1 
   2  -7 -20 3892.47 618.076   3 
   2   7 -21 9838.42 477.590   3 
   2  -7 -21 8288.50 288.974   1 
  -2  -7  21 10542.4 921.605   2 
   2  -7 -21 8338.42 292.837   1 
   2   7  21 9895.39 674.469   2 
  -2  -7 -21 10186.0 916.785   3 
   2  -7 -21 10250.5 921.553   3 
  -2  -7 -21 10579.5 755.943   1 
   2  -7  21 10177.4 921.078   2 
   2  -7  22 2151.38 486.348   2 
  -2  -7  22 2336.68 508.669   2 
   2   7  22 2173.99 338.651   2 
  -2  -7 -22 2500.52 379.100   1 
   2   7 -22 2275.59 240.997   3 
   2  -7 -22 2613.56 539.258   3 
  -2  -7 -22 2453.48 529.373   3 
   2  -7  23 895.653 350.813   2 
   2  -7 -23 868.163 344.743   3 
   2   7  23 816.822 235.597   2 
   2   7 -23 817.984 165.312   3 
  -2  -7 -23 728.615 241.593   1 
  -2  -7  23 956.536 391.470   2 
  -2  -7 -23 1336.72 452.129   3 
   2  -7  24 383.105 397.114   2 
  -2  -7 -24 108.004 163.755   1 
  -2  -7  24 117.160 281.839   2 
   2  -7 -24 259.579 347.618   3 
   2   7 -24 153.250 123.069   3 
  -2  -7  25 9346.65 946.430   2 
  -2  -7 -25 9130.41 704.409   1 
  -2  -7 -25 8657.79 920.164   3 
   2  -7 -25 8141.85 857.752   3 
   2  -7  25 9551.22 946.246   2 
  -2  -7  26 1811.89 479.614   2 
   2  -7  26 2418.57 549.169   2 
  -2  -7 -26 3065.06 623.336   3 
  -2  -7 -26 2237.46 381.000   1 
   2  -7 -26 2625.43 568.587   3 
   2  -7  27 188.807 321.609   2 
  -2  -7  27 224.532 299.135   2 
  -2  -7 -27 656.179 611.352   3 
  -2  -7 -27 322.710 179.693   1 
   2  -7 -27 756.100 397.782   3 
   2  -7  28-407.359 342.427   2 
  -2  -7  28 466.412 360.785   2 
   2  -7 -28 46.6753 317.913   3 
  -2  -7 -28 325.385 203.147   1 
   2  -7  29 2639.48 543.883   2 
  -2  -7  29 3528.39 603.004   2 
  -2  -7 -29 3605.37 656.571   3 
   2  -7 -29 2891.67 643.932   3 
   2  -7  30-17.7258 300.409   2 
  -2  -7  30 249.456 330.666   2 
  -2  -7 -30 506.119 422.599   3 
   2  -7 -30 948.006 574.547   3 
   2  -7  31 6788.81 874.572   2 
  -2  -7  31 7479.10 911.604   2 
   2  -7 -31 6715.34 892.919   3 
  -2  -7 -31 6865.88 951.656   3 
  -2  -7  32 6052.91 812.632   2 
   2  -7 -32 6840.44 929.808   3 
  -2  -7 -32 7359.75 933.778   3 
   2  -7  32 6935.78 902.007   2 
   2  -7  33 1349.86 481.663   2 
  -2  -7  33 1383.53 441.384   2 
  -2  -7 -33 1854.87 612.912   3 
   2  -7 -33 2081.84 662.132   3 
   2  -7  34 2585.05 631.450   2 
   2  -7 -34 2475.33 615.712   3 
  -2  -7  34 2403.10 541.902   2 
  -2  -7 -34 2250.05 585.152   3 
   2  -7  35 807.299 397.769   2 
  -2  -7 -35 692.675 492.718   3 
  -2  -7  35 499.787 378.874   2 
   2  -7 -35-443.858 373.214   3 
   2  -7  36 1218.94 484.574   2 
  -2  -7  36 1672.28 521.527   2 
   2  -7 -36 1386.49 484.181   3 
   2  -7  37 227.575 311.682   2 
  -2  -7  37 321.737 341.680   2 
  -2  -7  38 260.057 322.875   2 
   2  -7  38 419.438 431.619   2 
  -2  -7  39 2461.35 606.943   2 
   2  -7  39 2314.36 596.862   2 
  -2  -7  40 1427.90 472.518   2 
   2  -7  40 1879.71 548.037   2 
   2  -7  41 669.165 437.942   2 
   2  -8   0 325.901 248.247   2 
  -2  -8   0 685.891 339.463   2 
   2   8   0 462.087 237.045   3 
   2  -8   0 860.206 286.513   3 
  -2  -8  -1 15842.4 995.745   2 
  -2  -8   1 16689.3 1025.94   2 
   2   8  -1 16600.4 796.908   3 
   2  -8   1 15907.7 697.798   3 
   2  -8  -1 15783.1 762.893   3 
   2   8   1 16824.0 836.466   3 
   2  -8   1 15380.4 941.862   2 
   2  -8  -1 15607.1 922.652   2 
   2  -8  -2 14694.8 865.810   2 
   2   8   2 16309.8 858.274   3 
  -2  -8   2 15478.4 1025.90   2 
  -2  -8  -2 15778.5 995.448   2 
   2  -8  -2 16004.9 783.616   3 
   2  -8   2 14542.8 923.678   2 
   2  -8   2 15224.3 667.672   3 
   2   8  -2 15687.6 756.855   3 
   2  -8  -3 1163.53 343.121   1 
   2  -8   3 1389.02 379.796   2 
   2  -8  -3 261.209 169.791   2 
  -2  -8   3 1054.65 407.959   2 
   2   8  -3 1233.93 283.109   3 
   2   8   3 1225.73 320.783   3 
  -2  -8  -3 1450.62 407.907   2 
   2  -8  -3 1474.05 345.653   3 
   2  -8   3 1073.43 232.298   3 
  -2  -8  -4 19969.1 1097.09   2 
   2  -8  -4 18423.4 954.273   2 
   2  -8  -4 20241.2 926.878   3 
  -2  -8   4 20012.2 1176.89   2 
   2  -8   4 20661.5 1117.75   2 
   2   8  -4 20257.0 814.451   3 
   2  -8   4 18681.6 646.932   3 
   2   8   4 20911.5 1004.86   3 
   2  -8  -4 20616.4 1027.35   1 
   2  -8   5 15772.1 556.348   3 
   2  -8  -5 15229.4 850.558   2 
  -2  -8  -5 16281.9 983.231   2 
  -2  -8   5 16984.6 1078.99   2 
   2   8   5 18566.7 957.954   3 
   2  -8  -5 17812.0 900.820   3 
   2   8  -5 17595.7 740.881   3 
   2  -8  -5 17522.6 945.775   1 
   2  -8   5 17422.9 1053.49   2 
  -2  -8  -5 16137.6 883.358   3 
   2  -8  -6 14506.5 822.025   3 
   2  -8  -6 13306.5 772.309   2 
  -2  -8  -6 14749.3 870.610   3 
   2  -8   6 14462.5 978.148   2 
  -2  -8   6 14794.2 1011.35   2 
   2   8  -6 13868.3 644.101   3 
   2  -8   6 12670.7 453.612   3 
  -2  -8  -6 14383.4 920.314   2 
   2  -8  -6 14926.3 860.365   1 
   2  -8   7 2140.70 409.449   2 
  -2  -8  -7 2261.90 391.476   3 
   2  -8  -7 1302.17 244.821   2 
   2   8  -7 2306.48 284.724   3 
  -2  -8   7 2218.40 449.223   2 
  -2  -8  -7 1941.74 380.714   2 
   2  -8  -7 1879.29 328.293   1 
   2  -8   7 1212.80 99.6268   3 
  -2   8   7 1760.06 349.411   3 
   2  -8  -7 2224.02 377.179   3 
   2  -8   8 1432.50 408.847   2 
   2   8  -8 1295.73 206.395   3 
   2  -8  -8 826.783 185.832   2 
  -2  -8   8 1550.61 388.909   2 
   2  -8  -8 913.565 228.181   1 
   2  -8  -8 1056.55 291.867   3 
   2  -8   8 748.294 82.7539   3 
  -2  -8  -8 1498.11 353.430   3 
  -2  -8  -8 1449.99 335.196   2 
   2  -8   9 1412.69 422.806   2 
   2  -8  -9 1159.63 262.369   1 
   2  -8  -9 1626.26 366.702   2 
  -2  -8   9 1085.97 349.992   2 
  -2  -8  -9 1578.67 373.507   3 
  -2  -8  -9 1293.29 325.852   2 
   2   8  -9 1288.57 186.949   3 
   2  -8  -9 1555.54 373.511   3 
   2   8 -10 2467.82 248.392   3 
   2  -8  10 2629.15 453.653   2 
  -2  -8 -10 2759.85 460.134   3 
   2  -8 -10 2704.99 357.410   1 
   2  -8 -10 2844.59 432.053   3 
  -2  -8  10 2675.21 503.341   2 
  -2  -8 -10 2962.06 434.243   2 
   2  -8 -10 3199.43 402.934   2 
   2  -8  11 3550.47 562.834   2 
   2  -8 -11 3703.93 411.630   2 
   2   8 -11 3627.17 285.996   3 
  -2  -8  11 2976.23 553.301   2 
  -2  -8 -11 3474.61 524.220   3 
   2  -8 -11 3492.75 389.892   1 
  -2  -8 -11 3617.40 492.602   2 
   2  -8 -11 4167.73 542.440   3 
  -2  -8  12 15337.8 1064.75   2 
   2   8 -12 14489.5 529.060   3 
   2  -8 -12 14646.8 773.153   1 
   2  -8 -12 14341.6 935.742   3 
   2  -8 -12 15137.7 741.372   2 
  -2  -8 -12 15819.5 926.242   2 
  -2  -8 -12 15315.8 979.418   3 
   2  -8  12 15008.4 1053.21   2 
   2  -8  13 601.441 386.448   2 
   2  -8 -13 474.701 173.762   1 
   2  -8 -13 963.816 321.867   3 
  -2  -8 -13 864.340 418.755   3 
   2  -8 -13-78.3906 221.863   2 
   2   8 -13 265.059 104.388   3 
  -2  -8 -13 76.6689 223.419   2 
  -2  -8  13 201.453 309.379   2 
   2  -8  14 368.427 276.771   2 
   2  -8 -14-205.878 224.963   2 
   2   8 -14 282.943 89.9271   3 
   2  -8 -14 139.454 264.598   3 
  -2  -8 -14 327.637 303.714   3 
   2  -8 -14 88.0129 132.143   1 
  -2  -8  14 454.077 360.822   2 
   2   8 -15 1871.07 182.457   3 
   2  -8  15 1920.57 460.292   2 
   2   8  15 1944.86 337.623   2 
  -2  -8 -15 1962.67 430.099   3 
   2  -8 -15 1222.50 120.672   2 
  -2  -8  15 1872.78 483.880   2 
   2  -8 -15 1860.44 261.443   1 
   2  -8 -15 1649.03 376.636   3 
  -2  -8 -15 2132.55 372.724   1 
  -2  -8 -16 264.224 258.128   1 
   2  -8  16 274.507 306.577   2 
   2   8  16 422.089 219.431   2 
   2  -8 -16 62.7524 101.627   1 
   2  -8 -16-141.969 243.331   3 
   2   8 -16 99.1754 74.6898   3 
   2  -8 -16-376.420 194.262   2 
   2   8 -16 77.0217 73.1783   3 
  -2  -8 -16-102.119 240.766   3 
  -2  -8  16 43.7285 299.589   2 
   2  -8  17 471.747 275.446   2 
   2   8  17 475.160 186.935   2 
   2  -8 -17 614.040 158.924   1 
  -2  -8  17 1036.99 322.044   2 
  -2  -8 -17 428.417 296.241   3 
  -2  -8 -17 840.221 307.596   1 
   2   8 -17 540.470 99.0648   3 
   2  -8 -17 725.904 154.449   2 
   2   8 -17 614.167 107.319   3 
   2  -8 -17 468.702 271.557   3 
   2  -8  18 234.494 248.013   2 
   2   8  18 145.492 180.473   2 
  -2  -8 -18 327.549 228.608   1 
  -2  -8  18 348.520 252.988   2 
  -2  -8 -18 555.310 304.400   3 
   2  -8 -18 24.9176 311.780   3 
   2  -8 -18 531.178 138.594   2 
   2   8 -18 265.966 73.5199   3 
   2  -8 -18 396.137 150.314   1 
   2  -8  19 3192.19 557.691   2 
   2   8  19 3287.57 430.549   2 
  -2  -8 -19 2975.31 460.405   1 
   2  -8 -19 3210.17 573.151   3 
  -2  -8  19 2297.50 493.472   2 
   2   8 -19 2748.38 207.069   3 
  -2  -8 -19 2961.90 563.342   3 
   2  -8  20 4061.60 630.892   2 
   2   8  20 3722.04 453.510   2 
  -2  -8 -20 4533.43 669.957   3 
   2  -8 -20 4286.98 616.036   3 
  -2  -8  20 3516.42 622.374   2 
   2  -8 -20 4238.80 328.002   1 
  -2  -8 -20 4622.91 554.261   1 
   2  -8  21 1380.70 494.767   2 
  -2  -8 -21 1026.69 313.098   1 
   2   8  21 809.206 229.466   2 
  -2  -8  21 1359.64 472.091   2 
  -2  -8 -21 1395.03 437.964   3 
   2  -8 -21 1471.83 473.196   3 
   2  -8  22 3543.32 663.657   2 
  -2  -8 -22 3373.89 465.868   1 
  -2  -8 -22 2928.96 506.713   3 
  -2  -8  22 2904.23 552.447   2 
   2  -8 -22 2910.12 534.804   3 
   2  -8  23 297.951 333.619   2 
  -2  -8  23-121.876 263.023   2 
  -2  -8 -23 189.923 214.048   1 
  -2  -8 -23 97.9706 305.912   3 
   2  -8 -23 560.947 402.828   3 
  -2  -8 -24 1554.42 355.119   1 
   2  -8  24 680.571 364.250   2 
  -2  -8 -24 1772.74 489.230   3 
  -2  -8  24 823.623 404.663   2 
   2  -8 -24 1012.19 431.179   3 
   2  -8  25 3217.98 646.054   2 
  -2  -8 -25 2478.53 414.823   1 
  -2  -8 -25 3119.24 603.730   3 
   2  -8 -25 2648.23 614.111   3 
  -2  -8  25 2090.06 503.879   2 
   2  -8  26 3947.97 660.286   2 
  -2  -8 -26 3527.55 652.242   3 
  -2  -8  26 4105.37 651.664   2 
   2  -8 -26 4410.15 701.796   3 
  -2  -8 -26 3704.23 477.640   1 
   2  -8  27 130.317 339.468   2 
  -2  -8 -27 122.565 201.841   1 
   2  -8 -27 537.309 403.368   3 
  -2  -8  27 440.633 318.050   2 
  -2  -8 -27-32.9778 335.909   3 
   2  -8  28 691.207 423.142   2 
  -2  -8 -28 296.939 279.323   3 
  -2  -8  28 256.497 337.726   2 
   2  -8 -28 811.065 461.736   3 
   2  -8  29 503.382 457.809   2 
  -2  -8 -29 267.355 311.201   3 
   2  -8 -29 46.6775 386.204   3 
  -2  -8  29 340.100 348.074   2 
  -2  -8 -30 1719.86 506.464   3 
   2  -8  30 2899.12 644.673   2 
  -2  -8  30 2870.86 589.383   2 
   2  -8 -30 2563.92 638.729   3 
   2  -8 -31 2245.90 644.439   3 
   2  -8  31 2104.32 566.262   2 
  -2  -8  31 2294.49 556.959   2 
  -2  -8 -31 2020.10 532.004   3 
  -2  -8  32 109.519 303.642   2 
   2  -8  32 360.017 390.579   2 
  -2  -8 -32 71.2153 377.005   3 
   2  -8 -32-166.436 393.411   3 
   2  -8  33 1442.43 509.342   2 
  -2  -8  33 1248.54 473.521   2 
  -2  -8 -33 2044.67 607.088   3 
   2  -8 -33 2311.57 618.869   3 
   2  -8  34 1683.98 580.397   2 
  -2  -8 -34 1631.14 578.077   3 
   2  -8 -34 1726.79 553.026   3 
  -2  -8  34 1774.02 532.162   2 
   2  -8  35 587.701 475.327   2 
  -2  -8  35 584.595 469.138   2 
   2  -8  36 2193.18 619.342   2 
  -2  -8  36 1207.83 457.404   2 
  -2  -8  37 2656.42 624.885   2 
   2  -8  37 3338.66 763.409   2 
   2  -8  38 95.0270 355.076   2 
  -2  -8  38-172.517 342.667   2 
  -2  -8  39 111.249 276.809   2 
  -2  -8  40-142.131 291.904   2 
   2  -9   0 40470.7 1607.01   2 
  -2  -9   0 41555.0 1708.43   2 
   2  -9   0 40738.8 1217.03   3 
   2   9   0 41008.0 1333.29   3 
  -2  -9  -1 361.034 345.327   2 
   2  -9  -1 233.123 359.608   2 
   2  -9   1 1362.85 331.669   3 
  -2  -9   1 705.247 402.652   2 
   2  -9  -1 815.667 337.977   3 
   2   9   1 591.407 316.950   3 
   2  -9   1 597.182 418.554   2 
   2   9  -1 1000.35 317.366   3 
   2  -9   2 11277.0 894.432   2 
   2  -9  -2 10380.5 812.538   2 
  -2  -9   2 11254.1 923.026   2 
   2  -9   2 10458.6 577.872   3 
   2  -9  -2 10318.7 678.425   3 
   2   9  -2 10618.2 656.957   3 
   2   9   2 10675.4 719.912   3 
  -2  -9  -2 11917.0 924.205   2 
   2  -9   3 11980.5 921.251   2 
   2  -9  -3 10721.8 791.816   2 
   2  -9  -3 10829.3 699.720   3 
  -2  -9   3 11641.5 959.619   2 
   2  -9   3 10191.6 547.303   3 
   2   9  -3 10884.5 649.449   3 
   2   9   3 10954.7 735.942   3 
  -2  -9  -3 11484.7 907.466   2 
   2   9  -4 7262.35 527.939   3 
   2  -9   4 6072.03 402.678   3 
   2  -9  -4 5899.35 557.007   2 
  -2  -9  -4 6371.39 679.844   2 
   2  -9  -4 6783.77 590.772   3 
   2  -9   4 7061.16 748.638   2 
  -2  -9   4 7123.42 780.679   2 
   2  -9  -5 14653.2 876.516   2 
  -2  -9   5 15932.2 1108.51   2 
   2  -9   5 14079.3 574.222   3 
  -2  -9  -5 16533.6 1042.63   2 
   2  -9  -5 15034.9 857.773   3 
   2   9  -5 15039.7 714.396   3 
   2  -9   5 16010.8 1078.52   2 
   2  -9  -6 6540.70 528.509   2 
  -2  -9   6 8584.35 861.349   2 
   2  -9   6 7342.58 377.307   3 
  -2  -9  -6 8654.20 684.354   3 
   2   9  -6 8037.60 513.309   3 
  -2  -9  -6 8125.52 754.356   2 
   2  -9  -6 8909.29 676.033   3 
   2  -9   6 8225.69 799.547   2 
   2  -9   7 516.515 352.888   2 
   2  -9  -7-379.391 364.454   2 
   2  -9   7 379.707 126.614   3 
  -2  -9  -7 656.343 352.420   3 
  -2  -9   7 391.293 396.955   2 
  -2  -9  -7 143.462 234.325   2 
   2   9  -7 286.352 167.614   3 
   2  -9  -7 358.129 263.488   3 
   2   9  -8 10197.6 525.655   3 
   2  -9  -8 9117.03 674.020   2 
  -2  -9   8 9516.86 869.646   2 
  -2  -9  -8 10103.6 778.109   3 
  -2  -9  -8 10575.5 847.825   2 
   2  -9   8 9432.46 328.774   3 
   2  -9  -8 10090.4 751.285   3 
   2  -9   8 10480.6 898.915   2 
   2  -9   9 210.100 315.445   2 
   2   9  -9 531.453 174.716   3 
   2  -9  -9 598.569 258.220   1 
  -2  -9   9 379.471 367.799   2 
   2  -9  -9 533.656 331.782   3 
  -2  -9  -9 13.6215 245.710   3 
   2  -9  -9-153.621 249.274   2 
  -2  -9  -9 282.697 260.820   2 
  -2  -9 -10 6104.44 620.622   3 
   2  -9  10 5352.08 669.072   2 
   2  -9 -10 5671.32 510.346   2 
  -2  -9  10 7269.58 817.054   2 
   2  -9 -10 5358.64 586.561   3 
  -2  -9 -10 5592.24 630.423   2 
   2   9 -10 5952.81 376.674   3 
   2  -9 -10 5644.21 542.146   1 
   2  -9  11-118.665 259.859   2 
  -2  -9 -11-119.824 239.206   3 
   2   9 -11 117.934 101.705   3 
  -2  -9 -11 94.5922 219.490   2 
   2  -9 -11-481.623 286.316   2 
   2  -9 -11-69.4274 222.066   3 
   2  -9 -11 224.686 171.603   1 
   2   9 -12 1497.26 178.885   3 
  -2  -9 -12 1244.64 378.817   3 
   2  -9  12 786.877 313.854   2 
  -2  -9  12 1998.50 466.749   2 
   2  -9 -12 1221.54 181.422   2 
   2  -9 -12 1112.00 294.046   3 
  -2  -9 -12 1492.44 318.425   2 
   2  -9 -12 1626.48 312.650   1 
   2  -9  13 1569.52 472.055   2 
  -2  -9  13 1588.30 482.867   2 
   2  -9 -13 1309.82 424.699   3 
   2  -9 -13 1155.77 155.768   2 
   2  -9 -13 1532.92 295.477   1 
  -2  -9 -13 1624.82 475.178   3 
  -2  -9 -13 1979.93 402.883   2 
   2  -9 -14 11635.6 723.864   1 
  -2  -9 -14 13577.1 994.917   3 
  -2  -9  14 12371.6 1065.99   2 
   2  -9 -14 12110.5 687.603   2 
   2  -9 -14 11159.4 912.348   3 
  -2  -9 -14 12864.0 864.319   2 
   2  -9  14 12926.4 1075.91   2 
   2  -9 -15 4838.45 470.653   1 
  -2  -9 -15 6026.38 731.270   3 
   2  -9 -15 4697.46 419.071   2 
   2  -9 -15 5122.32 651.097   3 
   2   9 -15 4356.84 232.285   3 
  -2  -9  15 4945.40 705.096   2 
  -2  -9 -15 5183.57 586.945   1 
   2  -9  15 5474.00 760.221   2 
  -2  -9  16 1202.76 510.562   2 
   2  -9  16 863.990 418.856   2 
  -2  -9 -16 1581.19 509.874   3 
   2  -9 -16 417.626 150.959   2 
   2  -9 -16 1066.60 385.250   3 
  -2  -9 -16 893.844 292.370   1 
  -2  -9  17 9850.24 979.892   2 
  -2  -9 -17 10658.3 945.040   3 
   2  -9 -17 10656.3 579.264   2 
   2  -9 -17 9493.75 873.090   3 
  -2  -9 -17 10091.6 840.893   1 
   2  -9  17 9157.62 946.112   2 
   2  -9  18 2597.25 610.472   2 
  -2  -9  18 3043.92 619.099   2 
   2  -9 -18 2629.70 295.389   2 
  -2  -9 -18 2724.83 455.552   1 
   2  -9 -18 2834.05 593.131   3 
  -2  -9 -18 2506.84 590.474   3 
   2  -9 -19 10775.3 967.058   3 
  -2  -9  19 11135.0 1029.24   2 
  -2  -9 -19 11798.6 1017.87   3 
  -2  -9 -19 11554.5 877.626   1 
   2  -9  19 12249.6 1101.42   2 
   2  -9  20 1016.37 468.650   2 
  -2  -9 -20 719.581 279.820   1 
  -2  -9 -20 1355.22 495.481   3 
   2  -9 -20 799.937 362.657   3 
  -2  -9  20 876.694 440.802   2 
   2  -9 -21 360.095 391.983   3 
   2  -9  21 920.552 430.067   2 
  -2  -9 -21-45.5627 226.604   1 
  -2  -9  21 482.920 392.589   2 
  -2  -9 -21 470.621 353.023   3 
   2  -9  22 8037.71 918.735   2 
  -2  -9  22 7839.50 904.826   2 
  -2  -9 -22 7908.46 863.278   3 
   2  -9 -22 7554.64 870.729   3 
  -2  -9 -22 8105.66 729.748   1 
  -2  -9  23 717.313 458.659   2 
   2  -9  23 1006.96 468.093   2 
  -2  -9 -23 1129.46 513.882   3 
   2  -9 -23 296.861 383.179   3 
  -2  -9 -23 335.356 306.357   1 
  -2  -9 -24 8296.91 735.935   1 
  -2  -9 -24 6808.92 821.386   3 
  -2  -9  24 6929.15 871.558   2 
   2  -9 -24 6659.73 840.940   3 
   2  -9  24 7985.41 947.231   2 
   2  -9  25 1104.13 449.124   2 
  -2  -9  25 289.117 322.865   2 
  -2  -9 -25 491.519 256.856   1 
   2  -9 -25 329.264 289.828   3 
  -2  -9 -25 952.579 449.212   3 
  -2  -9 -26 245.957 430.979   3 
   2  -9  26-325.626 389.823   2 
  -2  -9  26 501.502 408.338   2 
   2  -9 -26 229.864 429.050   3 
  -2  -9  27 3153.33 664.513   2 
  -2  -9 -27 2558.63 616.128   3 
   2  -9 -27 3003.92 618.924   3 
   2  -9  27 2458.20 568.172   2 
  -2  -9  28 594.286 382.505   2 
   2  -9  28 887.639 455.870   2 
  -2  -9 -28 1635.12 527.293   3 
   2  -9 -28 1657.62 573.409   3 
   2  -9  29 1774.02 613.288   2 
  -2  -9 -29 2139.57 649.250   3 
   2  -9 -29 2638.02 616.783   3 
  -2  -9  29 1842.04 519.734   2 
  -2  -9  30 386.522 371.262   2 
   2  -9  30 323.232 395.266   2 
  -2  -9 -30 762.184 519.190   3 
   2  -9 -30-323.112 437.318   3 
   2  -9  31 439.994 394.348   2 
  -2  -9  31 236.158 320.985   2 
   2  -9 -31 13.6419 348.027   3 
  -2  -9 -31 865.071 464.348   3 
   2  -9  32 2817.03 665.650   2 
  -2  -9  32 2317.97 597.390   2 
  -2  -9 -32 2942.04 662.656   3 
   2  -9 -32 3124.07 700.215   3 
   2  -9  33 1210.43 572.054   2 
  -2  -9  33 998.012 468.999   2 
   2  -9  34 467.649 395.463   2 
  -2  -9  34 560.951 414.476   2 
  -2  -9  35 1124.75 479.337   2 
  -2  -9  36 224.038 353.403   2 
   2 -10   0 25956.0 1371.77   2 
  -2 -10   0 24560.8 1388.31   2 
   2 -10   0 23522.1 947.179   3 
   2  10   0 24617.7 1074.98   3 
   2 -10   1 934.954 411.784   2 
   2 -10  -1 1109.71 448.191   2 
   2 -10   1 145.493 154.035   3 
  -2 -10   1 592.653 409.981   2 
   2 -10  -1 165.312 169.240   3 
  -2 -10  -1 523.052 397.912   2 
   2  10   1 632.716 295.322   3 
   2  10  -1 537.223 254.486   3 
   2 -10   2 1347.98 235.117   3 
   2 -10  -2 1297.69 262.521   3 
   2 -10   2 1633.58 470.165   2 
   2 -10  -2 1906.54 461.661   2 
  -2 -10   2 1190.32 429.777   2 
  -2 -10  -2 1185.87 416.886   2 
   2  10  -2 1473.39 277.536   3 
   2 -10   3 2469.78 521.393   2 
   2  10  -3 2520.67 363.240   3 
   2 -10  -3 2771.60 504.499   2 
   2 -10   3 2349.55 298.631   3 
  -2 -10   3 2757.57 572.625   2 
   2 -10  -3 2398.72 393.789   3 
  -2 -10  -3 3197.55 576.532   2 
   2 -10  -4 13839.7 932.659   2 
   2 -10   4 12727.5 607.370   3 
  -2 -10  -4 14017.6 1043.07   2 
   2 -10  -4 12942.6 789.914   3 
  -2 -10   4 14067.7 1080.31   2 
   2 -10   4 13692.1 1042.20   2 
   2  10  -4 13935.5 735.452   3 
   2 -10   5 3998.97 334.361   3 
   2 -10   5 4945.80 681.858   2 
   2 -10  -5 2582.68 324.466   2 
  -2 -10  -5 4593.60 608.799   2 
   2  10  -5 4355.16 410.561   3 
  -2 -10   5 4985.69 691.629   2 
   2 -10  -5 4043.14 475.778   3 
   2 -10   6 3023.62 282.529   3 
  -2 -10  -6 2068.91 439.356   2 
   2 -10   6 2137.66 492.926   2 
   2 -10  -6 1123.03 205.249   2 
  -2 -10   6 2920.12 582.814   2 
   2 -10  -6 2126.56 366.315   3 
   2 -10   7 2169.55 206.722   3 
  -2 -10  -7 2142.79 428.299   3 
   2 -10   7 2461.78 523.482   2 
   2 -10  -7 911.863 322.539   2 
  -2 -10   7 2376.85 532.861   2 
   2 -10  -7 2075.36 396.353   3 
  -2 -10  -7 2396.42 478.855   2 
   2 -10   8 9089.39 874.483   2 
   2 -10  -8 8506.03 738.146   3 
   2 -10  -8 8284.92 673.629   2 
  -2 -10   8 8452.21 890.865   2 
  -2 -10  -8 9727.93 840.939   2 
  -2 -10  -8 9581.89 772.956   3 
   2 -10  -9 9622.63 727.060   2 
  -2 -10   9 10466.8 1008.83   2 
  -2 -10  -9 10736.5 843.881   3 
   2 -10  -9 9939.98 816.990   3 
  -2 -10  -9 9688.63 854.736   2 
   2 -10   9 10587.7 995.744   2 
   2 -10  10 8091.00 885.252   2 
   2 -10 -10 7621.29 625.747   2 
   2 -10 -10 8609.25 785.012   3 
  -2 -10 -10 8098.49 791.148   2 
  -2 -10  10 9410.96 962.558   2 
  -2 -10 -10 8145.02 766.275   3 
  -2 -10 -11 4630.63 604.567   3 
   2 -10  11 4934.80 725.586   2 
   2 -10 -11 4391.70 457.772   2 
  -2 -10  11 4995.13 725.844   2 
   2 -10 -11 4965.43 621.696   3 
  -2 -10 -11 4348.27 575.650   2 
   2 -10  12 1133.63 441.714   2 
  -2 -10  12 811.387 374.664   2 
   2 -10 -12 405.598 226.329   2 
   2 -10 -12 1109.48 364.916   3 
  -2 -10 -12 980.407 384.167   3 
  -2 -10 -12 1054.28 326.544   2 
  -2 -10 -13 3462.72 506.987   2 
   2 -10  13 2551.32 546.375   2 
  -2 -10 -13 3153.63 504.052   3 
  -2 -10  13 2292.01 472.294   2 
   2 -10 -13 2916.07 363.675   2 
   2 -10 -13 3643.40 567.236   3 
  -2 -10 -14 1593.15 432.028   3 
   2 -10  14 2112.82 525.442   2 
  -2 -10  14 1533.36 503.440   2 
   2 -10 -14 1530.62 277.646   2 
   2 -10 -14 2269.33 505.599   3 
  -2 -10 -14 2419.84 449.488   2 
   2 -10  15 2955.73 588.398   2 
  -2 -10  15 3143.81 596.168   2 
  -2 -10 -15 3581.27 513.012   2 
  -2 -10 -15 3184.18 545.163   3 
   2 -10 -15 3247.11 390.744   2 
   2 -10 -15 3223.45 551.311   3 
   2 -10  16 1228.06 466.776   2 
   2 -10 -16 321.466 144.643   2 
   2 -10 -16 561.790 319.075   3 
  -2 -10 -16 428.656 313.945   3 
  -2 -10  16 910.585 428.220   2 
  -2 -10 -16 343.954 276.013   1 
  -2 -10 -17 1383.28 361.380   1 
   2 -10  17 1415.61 503.410   2 
  -2 -10  17 2274.90 543.036   2 
   2 -10 -17 1683.30 423.056   3 
  -2 -10 -17 1616.61 436.628   3 
   2 -10 -18 1632.50 393.532   3 
  -2 -10 -18 1351.19 373.057   1 
   2 -10  18 2441.30 597.389   2 
  -2 -10  18 1295.92 482.425   2 
  -2 -10 -18 1962.91 476.166   3 
  -2 -10 -19 1402.66 390.478   1 
   2 -10  19 1484.65 509.910   2 
  -2 -10 -19 1335.43 425.227   3 
   2 -10 -19 922.361 351.230   3 
  -2 -10  19 615.401 379.386   2 
  -2 -10 -20 148.620 337.303   3 
  -2 -10 -20 411.894 269.034   1 
   2 -10  20 657.716 465.972   2 
  -2 -10  20 567.615 366.836   2 
   2 -10 -20-246.656 324.245   3 
  -2 -10  21 646.033 361.169   2 
   2 -10  21 1940.77 563.815   2 
  -2 -10 -21 1573.40 416.103   1 
  -2 -10 -21 1214.28 427.482   3 
   2 -10 -21 626.938 308.810   3 
   2 -10  22 2043.18 599.596   2 
  -2 -10 -22 1755.42 396.439   1 
   2 -10 -22 1680.56 483.024   3 
  -2 -10  22 2407.15 608.785   2 
  -2 -10 -22 1990.36 529.883   3 
   2 -10  23 1905.44 533.806   2 
  -2 -10 -23 1930.03 437.458   1 
  -2 -10 -23 2177.06 590.269   3 
   2 -10 -23 2130.33 574.861   3 
  -2 -10  23 2001.27 545.936   2 
   2 -10  24 5564.84 851.791   2 
  -2 -10  24 5404.92 806.928   2 
   2 -10 -24 5353.54 754.050   3 
  -2 -10 -24 5773.73 830.111   3 
   2 -10  25 746.948 414.835   2 
  -2 -10  25 576.301 419.853   2 
   2 -10 -25 82.3967 367.545   3 
  -2 -10 -25 700.915 500.630   3 
  -2 -10 -26 618.499 424.019   3 
   2 -10  26 114.823 347.314   2 
  -2 -10  26-90.1679 369.868   2 
   2 -10 -26 586.130 417.308   3 
  -2 -10  27 568.603 356.451   2 
   2 -10  27 622.430 399.960   2 
  -2 -10 -27 1699.60 546.929   3 
   2 -10 -27 900.766 451.384   3 
   2 -10 -28 6.60945 468.019   3 
   2 -10  28-220.955 322.367   2 
  -2 -10  28 125.996 344.865   2 
  -2 -10 -28 1142.63 512.596   3 
   2 -10  29 1422.99 521.533   2 
  -2 -10  29 2550.11 603.749   2 
   2 -10 -29 2570.63 603.703   3 
   2 -10  30 244.814 323.081   2 
  -2 -10 -30 744.288 471.600   3 
  -2 -10  30-307.015 363.527   2 
   2 -10 -30-655.472 473.661   3 
   2 -10  31 942.024 491.227   2 
  -2 -10  31 256.719 342.485   2 
  -2 -10  32 2003.69 612.633   2 
   2 -11   0 5455.55 760.196   2 
   2 -11   0 4207.30 438.544   3 
  -2 -11   0 5044.01 718.851   2 
   2 -11   1 1257.14 499.534   2 
   2 -11  -1 1921.92 606.854   2 
   2 -11  -1 414.933 194.885   3 
  -2 -11   1 1284.91 476.699   2 
  -2 -11  -1 1097.94 440.484   2 
   2 -11   1 537.744 207.181   3 
   2 -11   2 11039.1 1003.48   2 
   2 -11  -2 11666.0 964.580   2 
  -2 -11   2 10401.4 967.836   2 
  -2 -11  -2 10781.5 995.466   2 
   2 -11   2 10029.2 611.379   3 
   2 -11  -2 10353.0 700.837   3 
   2 -11  -3 637.150 250.140   3 
   2 -11  -3-254.507 343.307   2 
   2 -11   3 590.200 216.186   3 
  -2 -11   3 773.565 402.016   2 
  -2 -11  -3 355.403 317.425   2 
   2 -11   4 1757.84 256.916   3 
   2 -11   4 1841.29 480.228   2 
   2 -11  -4 751.047 236.301   2 
  -2 -11   4 2470.68 564.231   2 
   2 -11  -4 1702.55 335.220   3 
  -2 -11  -4 1616.62 383.887   2 
   2 -11   5 443.324 355.195   2 
   2 -11  -5-767.530 434.070   2 
  -2 -11   5 84.3781 307.952   2 
   2 -11  -5 20.8377 187.621   3 
  -2 -11  -5 146.403 262.310   2 
   2 -11   6 3135.13 588.354   2 
   2 -11  -6 3632.32 479.843   3 
  -2 -11  -6 3577.48 604.220   2 
   2 -11  -6 1856.28 275.027   2 
  -2 -11   6 2761.16 546.184   2 
   2 -11   7 784.823 332.268   2 
   2 -11  -7 267.155 342.456   2 
  -2 -11   7 598.089 311.646   2 
   2 -11  -7 636.580 251.405   3 
  -2 -11  -7 628.259 352.863   2 
   2 -11   8 216.980 306.449   2 
   2 -11  -8-316.197 285.272   2 
  -2 -11   8 187.110 299.905   2 
   2 -11  -8 512.003 315.986   3 
  -2 -11  -8 592.836 325.097   2 
   2 -11   9 206.701 288.030   2 
  -2 -11   9 418.659 364.512   2 
   2 -11  -9 570.583 308.585   3 
  -2 -11  -9 686.532 330.446   3 
   2 -11  -9 157.898 172.005   2 
  -2 -11  -9 618.312 375.866   2 
   2 -11  10 3090.95 637.124   2 
  -2 -11 -10 3387.41 542.274   3 
   2 -11 -10 2585.13 410.017   2 
  -2 -11  10 2947.80 594.303   2 
   2 -11 -10 3178.69 534.748   3 
  -2 -11 -10 3922.20 600.909   2 
  -2 -11 -11 3340.58 575.766   2 
   2 -11  11 4229.72 724.615   2 
  -2 -11  11 3555.27 694.776   2 
   2 -11 -11 2637.65 411.245   2 
   2 -11 -11 3614.23 586.489   3 
  -2 -11 -11 3432.51 588.558   3 
   2 -11  12 12951.3 1158.98   2 
  -2 -11  12 11335.8 1092.04   2 
   2 -11 -12 11874.0 837.642   2 
   2 -11 -12 11781.2 942.054   3 
  -2 -11 -12 12533.8 982.684   2 
  -2 -11 -12 12498.2 997.646   3 
   2 -11  13 4427.71 737.939   2 
   2 -11 -13 5401.91 683.776   3 
  -2 -11 -13 5189.13 675.461   3 
   2 -11 -13 5196.77 564.889   2 
  -2 -11 -13 5109.88 661.882   2 
  -2 -11  13 4915.55 785.287   2 
   2 -11  14 344.808 396.951   2 
  -2 -11 -14 803.900 417.978   3 
  -2 -11  14 502.402 436.175   2 
   2 -11 -14 211.360 277.406   3 
   2 -11 -14 752.144 287.488   2 
  -2 -11 -14 334.022 293.359   2 
   2 -11  15 3600.41 694.466   2 
   2 -11 -15 3193.00 549.731   3 
  -2 -11  15 3408.68 649.467   2 
  -2 -11 -15 2902.95 513.596   2 
  -2 -11 -15 3388.29 583.390   3 
   2 -11  16 3098.30 646.816   2 
  -2 -11  16 2675.60 607.842   2 
   2 -11 -16 1508.43 405.551   3 
  -2 -11 -16 2138.45 496.479   3 
  -2 -11 -16 2225.53 456.723   2 
  -2 -11  17-82.3114 319.016   2 
   2 -11  17 795.795 546.134   2 
   2 -11 -17 279.798 334.309   3 
  -2 -11 -17-181.585 230.950   1 
  -2 -11 -18 4798.50 657.436   1 
  -2 -11  18 5112.12 795.366   2 
   2 -11  18 6428.28 900.660   2 
  -2 -11 -18 5514.67 774.736   3 
   2 -11 -18 5165.88 713.092   3 
  -2 -11 -19 1079.32 489.590   3 
  -2 -11 -19 260.135 265.033   1 
  -2 -11  19 395.031 375.633   2 
   2 -11  19 730.862 491.457   2 
   2 -11 -19 495.744 387.428   3 
  -2 -11 -20 1002.43 326.356   1 
   2 -11  20 681.483 444.810   2 
   2 -11 -20 1095.00 430.182   3 
  -2 -11  20 1923.81 581.997   2 
  -2 -11 -20 834.482 387.487   3 
  -2 -11 -21 2218.63 462.624   1 
   2 -11  21 1923.42 594.900   2 
  -2 -11  21 2198.29 574.136   2 
   2 -11 -21 1732.35 438.406   3 
  -2 -11 -21 2439.93 562.039   3 
   2 -11  22 847.058 465.103   2 
  -2 -11 -22 896.163 462.300   3 
  -2 -11  22 134.589 324.859   2 
   2 -11 -22-118.629 412.341   3 
  -2 -11 -23 1517.79 532.309   3 
   2 -11  23 845.259 486.319   2 
  -2 -11  23 452.001 398.048   2 
   2 -11 -23 328.224 338.329   3 
   2 -11 -24 322.492 304.867   3 
   2 -11  24 1375.13 448.359   2 
  -2 -11  24 1212.20 498.152   2 
  -2 -11 -24 1867.85 590.913   3 
  -2 -11  25 446.486 372.902   2 
   2 -11  25-73.2413 355.393   2 
   2 -11 -25-129.655 297.558   3 
  -2 -11 -25-112.938 343.596   3 
   2 -11  26 3784.63 788.522   2 
   2 -11 -26 3097.09 614.528   3 
  -2 -11  26 4319.45 775.105   2 
  -2 -11 -26 3383.47 713.165   3 
   2 -11  27 1261.81 562.961   2 
  -2 -11  27 622.752 499.932   2 
   2 -11 -27-26.9735 308.801   3 
  -2 -11 -27 1125.51 424.737   3 
  -2 -11  28 426.321 401.398   2 
   2 -11 -28 707.737 379.055   3 
  -2 -11 -28 923.575 483.650   3 
   2 -12   0-433.450 424.290   2 
  -2 -12   0 421.930 330.304   2 
   2 -12   1 2360.68 534.749   2 
   2 -12  -1 943.772 283.159   2 
  -2 -12   1 1388.34 482.395   2 
  -2 -12  -1 1678.50 445.593   2 
   2 -12  -1 1510.91 305.223   3 
   2 -12   2 972.114 441.935   2 
   2 -12  -2-185.479 320.601   2 
  -2 -12   2 98.9702 299.559   2 
  -2 -12  -2 54.2327 347.370   2 
   2 -12  -2-76.3694 193.132   3 
   2 -12  -3 1110.61 249.974   2 
   2 -12   3 2638.50 558.179   2 
   2 -12  -3 1835.25 322.766   3 
  -2 -12   3 1882.46 527.939   2 
  -2 -12  -3 1622.61 415.247   2 
   2 -12   4 493.185 366.355   2 
  -2 -12  -4 180.316 257.356   2 
   2 -12  -4-298.100 336.018   2 
   2 -12  -4 405.361 194.765   3 
  -2 -12   4 35.1332 313.439   2 
   2 -12  -5 2235.57 389.069   3 
   2 -12   5 2793.06 597.436   2 
  -2 -12   5 2924.49 633.811   2 
   2 -12  -5 1846.77 354.873   2 
  -2 -12  -5 2338.35 513.583   2 
   2 -12  -6 1620.50 379.850   2 
   2 -12   6 2318.05 571.518   2 
  -2 -12   6 1952.11 561.624   2 
  -2 -12  -6 1506.39 411.542   2 
   2 -12  -6 1882.07 415.368   3 
   2 -12   7 8055.90 948.006   2 
   2 -12  -7 6774.27 707.033   2 
   2 -12  -7 7135.20 729.514   3 
  -2 -12  -7 7424.10 846.161   2 
  -2 -12   7 7488.67 924.039   2 
   2 -12   8 402.793 367.950   2 
   2 -12  -8 740.925 313.900   2 
   2 -12  -8 581.659 331.998   3 
  -2 -12   8 1258.06 523.833   2 
  -2 -12  -8 1042.91 406.123   2 
   2 -12  -9 547.241 326.042   3 
   2 -12   9 567.046 426.246   2 
   2 -12  -9 542.165 317.227   2 
  -2 -12  -9 613.206 353.190   2 
  -2 -12   9-109.372 282.926   2 
   2 -12  10-149.355 273.590   2 
   2 -12 -10 605.609 346.370   2 
  -2 -12  10 172.131 332.751   2 
  -2 -12 -10-95.5909 314.136   2 
   2 -12 -10 27.5897 237.483   3 
   2 -12  11 4684.99 733.226   2 
   2 -12 -11 5238.83 649.018   3 
   2 -12 -11 6063.99 690.957   2 
  -2 -12  11 5636.80 814.975   2 
  -2 -12 -11 5475.87 704.194   2 
  -2 -12 -11 5939.56 721.173   3 
   2 -12  12 1025.08 465.464   2 
  -2 -12 -12 1581.08 468.214   3 
  -2 -12  12 1260.33 479.385   2 
   2 -12 -12 2146.02 456.423   2 
   2 -12 -12 1842.98 465.386   3 
  -2 -12 -12 1141.62 375.368   2 
  -2 -12 -13 4024.48 601.902   2 
   2 -12  13 2586.21 585.092   2 
   2 -12 -13 3556.56 593.877   3 
  -2 -12  13 3708.00 690.235   2 
  -2 -12 -13 4325.81 670.443   3 
   2 -12  14 2353.40 586.381   2 
  -2 -12 -14 2866.89 566.709   3 
  -2 -12  14 3192.08 680.660   2 
   2 -12 -14 2517.71 506.741   3 
  -2 -12 -14 3118.75 549.419   2 
   2 -12  15 2991.53 658.313   2 
  -2 -12 -15 3651.59 652.004   3 
  -2 -12  15 3467.41 722.287   2 
   2 -12 -15 2775.30 567.421   3 
  -2 -12 -15 3148.29 536.109   2 
   2 -12  16 787.986 484.499   2 
   2 -12 -16 129.143 280.833   3 
  -2 -12 -16 663.563 400.770   3 
  -2 -12  16 159.353 281.446   2 
  -2 -12 -16 519.360 298.665   2 
  -2 -12 -17 2284.77 546.574   3 
   2 -12  17 1978.88 570.658   2 
  -2 -12  17 1768.41 561.440   2 
   2 -12 -17 1284.38 406.328   3 
  -2 -12 -17 1348.53 397.850   1 
  -2 -12 -18 1252.37 424.194   1 
   2 -12  18 743.929 449.149   2 
  -2 -12 -18 1704.95 526.845   3 
  -2 -12  18 571.375 413.003   2 
   2 -12 -18 940.322 367.719   3 
  -2 -12 -19 1761.59 523.368   3 
  -2 -12 -19 1812.95 461.050   1 
   2 -12  19 1873.00 608.510   2 
  -2 -12  19 2169.47 592.320   2 
   2 -12 -19 1273.28 390.038   3 
   2 -12 -20 184.454 289.160   3 
   2 -12  20 868.620 474.570   2 
  -2 -12 -20 635.427 418.634   3 
  -2 -12  20 691.586 464.658   2 
  -2 -12 -21 3528.81 665.829   3 
   2 -12  21 3968.78 804.536   2 
  -2 -12  21 3514.10 758.173   2 
   2 -12 -21 3030.56 579.317   3 
   2 -12  22 439.871 475.252   2 
  -2 -12 -22-29.8870 302.209   3 
  -2 -12  22 354.688 424.487   2 
   2 -12 -22 283.916 417.120   3 
  -2 -12 -23 665.352 413.509   3 
   2 -12  23 618.679 484.712   2 
  -2 -12  23 264.664 389.002   2 
   2 -12 -23 1110.44 453.939   3 
  -2 -12 -24 132.748 310.240   3 
   2 -12 -24 294.127 390.520   3 
   2 -12 -25 1942.63 560.397   3 
  -2 -12 -25 1307.78 490.003   3 
   2 -12 -26 425.553 421.351   3 
   2 -13   0 14221.0 1204.85   2 
  -2 -13   0 15497.9 1295.53   2 
   2 -13  -1 529.268 378.822   2 
   2 -13   1 82.7262 339.549   2 
  -2 -13   1 1032.59 485.365   2 
  -2 -13  -1 906.829 462.140   2 
   2 -13   2 3140.14 601.476   2 
  -2 -13   2 3675.58 687.565   2 
  -2 -13  -2 3986.16 698.709   2 
   2 -13  -2 3262.08 570.509   2 
   2 -13   3 979.051 356.089   2 
  -2 -13   3 1264.82 478.953   2 
  -2 -13  -3 1045.57 411.680   2 
   2 -13  -3 790.440 362.779   2 
  -2 -13  -4 302.100 294.865   2 
   2 -13   4 1029.53 429.093   2 
  -2 -13   4 1270.62 485.831   2 
   2 -13  -4 1075.20 425.639   2 
   2 -13   5 4355.34 745.837   2 
  -2 -13   5 3718.95 739.401   2 
   2 -13  -5 3484.62 558.849   2 
  -2 -13  -5 3345.65 615.609   2 
   2 -13   6 882.864 470.079   2 
  -2 -13   6 398.612 383.244   2 
  -2 -13  -6 585.154 336.967   2 
   2 -13  -6 398.831 310.596   2 
   2 -13   7 85.7521 301.977   2 
   2 -13  -7 423.115 311.335   2 
   2 -13  -7 25.8076 198.259   3 
  -2 -13   7 33.9302 294.019   2 
  -2 -13  -7-356.181 322.176   2 
   2 -13   8 3481.22 714.039   2 
   2 -13  -8 3203.12 581.120   2 
   2 -13  -8 2721.18 488.276   3 
  -2 -13   8 2974.61 684.140   2 
  -2 -13  -8 2859.76 582.512   2 
   2 -13   9 161.147 424.289   2 
   2 -13  -9 943.326 427.608   2 
   2 -13  -9 149.725 207.299   3 
  -2 -13  -9 150.324 321.312   2 
  -2 -13   9 127.762 419.668   2 
   2 -13  10 1170.49 466.694   2 
  -2 -13  10 1321.03 499.687   2 
  -2 -13 -10 1701.52 460.381   2 
   2 -13 -10 1172.68 421.481   3 
   2 -13  11 340.482 442.356   2 
  -2 -13 -11 134.357 330.647   2 
  -2 -13  11 174.899 383.434   2 
   2 -13 -11 259.861 254.713   3 
   2 -13  12-206.043 331.239   2 
  -2 -13  12-218.397 283.256   2 
   2 -13 -12 108.563 290.198   3 
  -2 -13 -12-198.512 261.730   2 
   2 -13  13 944.116 493.637   2 
  -2 -13 -13 964.718 392.646   2 
  -2 -13  13 824.850 510.317   2 
   2 -13 -13 746.242 371.538   3 
  -2 -13 -14 6800.66 794.629   2 
   2 -13  14 6844.14 982.094   2 
  -2 -13  14 7877.12 1067.92   2 
  -2 -13 -14 7094.98 819.343   3 
   2 -13 -14 6692.94 800.604   3 
   2 -13  15 1191.18 575.784   2 
  -2 -13  15 527.382 385.757   2 
   2 -13 -15 579.805 363.579   3 
  -2 -13 -15 517.184 370.937   3 
  -2 -13  16 612.856 405.772   2 
   2 -13  16 965.880 567.574   2 
   2 -13 -16 1296.65 462.589   3 
  -2 -13 -16 2113.78 550.174   3 
   2 -13  17 170.200 473.675   2 
  -2 -13 -17 670.739 382.928   3 
   2 -13 -17 377.392 260.053   3 
  -2 -13  17 492.863 519.603   2 
  -2 -13 -17 254.970 365.345   1 
   2 -13 -18 1616.18 495.317   3 
  -2 -13 -18 2136.84 511.595   3 
   2 -13  18 2200.75 648.297   2 
   2 -13 -19 301.829 335.536   3 
  -2 -13 -19 508.156 404.515   3 
   2 -13 -20 160.186 318.542   3 
  -2 -13 -20 263.535 376.747   3 
  -2 -13 -21 254.667 323.828   3 
   2 -13 -21 506.846 310.899   3 
  -2 -13 -22 151.039 359.473   3 
   2 -13 -22-462.760 502.828   3 
  -2 -13 -23 855.531 478.491   3 
   2 -13 -23-57.7148 340.329   3 
  -2 -14   0 2581.13 629.145   2 
   2 -14   0 2469.88 530.407   2 
  -2 -14  -1 687.484 366.461   2 
   2 -14   1 437.795 322.800   2 
   2 -14  -1 231.701 304.419   2 
  -2 -14   1 67.4480 325.368   2 
  -2 -14  -2 1164.37 399.142   2 
   2 -14   2 1513.24 510.679   2 
   2 -14  -2 1902.43 507.724   2 
  -2 -14   2 1475.86 437.152   2 
   2 -14  -3 1536.93 500.045   2 
   2 -14   3 942.485 443.613   2 
  -2 -14   3 965.975 454.723   2 
  -2 -14  -3 379.923 290.426   2 
   2 -14   4 402.866 351.392   2 
   2 -14  -4 71.1128 272.902   2 
  -2 -14   4 14.1730 349.087   2 
  -2 -14  -4 455.821 368.112   2 
  -2 -14  -5 2575.83 638.281   2 
   2 -14   5 1601.40 510.340   2 
   2 -14  -5 2623.93 545.170   2 
  -2 -14   5 2729.18 634.559   2 
  -2 -14   6 37.7719 345.154   2 
   2 -14   6-213.636 312.028   2 
   2 -14  -6 543.716 300.428   2 
  -2 -14  -6-658.295 410.324   2 
   2 -14   7-247.765 352.903   2 
   2 -14  -7 893.150 442.949   2 
  -2 -14   7 447.574 421.486   2 
  -2 -14  -7 314.906 304.585   2 
   2 -14   8 2805.97 622.115   2 
  -2 -14   8 2552.87 583.682   2 
  -2 -14  -8 3275.88 656.110   2 
   2 -14   9 1419.35 591.755   2 
  -2 -14   9 1386.58 506.280   2 
  -2 -14  -9 1026.66 461.712   2 
   2 -14  10 9877.96 1144.30   2 
  -2 -14  10 9310.08 1133.49   2 
  -2 -14 -10 9159.60 1017.18   2 
   2 -14  11 1131.53 582.427   2 
  -2 -14  11 166.338 355.407   2 
  -2 -14 -11 611.864 420.471   2 
   2 -14  12 2824.49 714.543   2 
  -2 -14 -12 2817.01 568.494   2 
   2 -14 -14-46.3976 271.783   3 
   2 -14 -15-366.096 339.461   3 
   2 -14 -16 236.211 307.111   3 
   2 -14 -17-283.178 346.291   3 
  -2 -14 -18-364.338 350.190   3 
   2 -14 -18-614.346 426.918   3 
  -2 -14 -19 573.181 379.462   3 
   2 -14 -19 69.2055 287.470   3 
   2 -14 -20 363.833 384.673   3 
  -2 -14 -20 1685.14 533.710   3 
   2 -14 -21 17.8139 289.706   3 
  -2 -15   0 1263.72 509.799   2 
   2 -15   0 572.788 404.036   2 
   2 -15  -1 845.264 398.595   2 
   2 -15   1 1163.23 494.358   2 
  -2 -15   1 1407.71 517.614   2 
  -2 -15  -1 1057.00 419.020   2 
  -2 -15   2 1032.52 486.150   2 
   2 -15  -2 714.775 447.967   2 
  -2 -15  -2 993.389 437.622   2 
   2 -15   2 1315.44 541.054   2 
  -2 -15  -3 1319.76 527.683   2 
   2 -15   3 912.466 482.596   2 
   2 -15  -3 802.844 412.541   2 
  -2 -15  -4 85.2199 333.023   2 
   2 -15   4 162.034 405.657   2 
   2 -15  -4-130.605 292.785   2 
   2 -15   5 80.7676 346.576   2 
  -2 -15  -5 187.150 321.564   2 
   2 -15   6 763.997 423.006   2 
  -2 -15  -6 305.425 284.836   2 
  -2 -15  -7 1951.40 539.131   2 
  -2 -15  -8 429.718 381.979   2 
  -2 -15  -9-130.620 288.301   2 
   2 -16  -1 255.158 365.397   2 
   3   0   0 153.824 185.181   1 
  -3   0   0 13.1186 205.318   1 
   3   0  -1-127.863 189.099   1 
   3   0   1 187.439 187.895   1 
  -3   0   1 297.339 191.297   1 
  -3   0  -1 218.872 196.205   1 
   3   0   2 65418.1 1308.83   1 
  -3   0   2 61054.1 1217.10   1 
  -3   0  -2 62744.4 1310.94   1 
   3   0  -2 62937.6 1222.12   1 
   3   0  -3 159.431 149.435   1 
  -3   0   3 90.4824 167.094   1 
  -3   0  -3 156.158 237.030   1 
   3   0   3 35.0211 159.369   1 
   3   0   4 12655.7 615.231   1 
  -3   0  -4 12839.2 640.784   1 
   3   0  -4 12057.7 557.499   2 
  -3   0   4 12291.7 546.843   1 
  -3   0   5-41.7949 152.104   1 
   3   0   5-75.3081 184.720   1 
   3   0  -5-135.139 191.685   2 
  -3   0  -5-133.356 220.468   1 
   3   0   6 19004.4 759.462   1 
  -3   0  -6 18232.1 771.537   1 
   3   0  -6 19233.4 675.206   2 
  -3   0   6 18553.2 645.470   1 
  -3   0   7-120.004 143.932   1 
   3   0   7-149.477 207.731   1 
   3   0  -7 53.7897 170.614   2 
  -3   0  -7 18.7894 223.240   1 
   3   0   8 20567.0 825.404   1 
  -3   0  -8 19766.8 820.631   1 
   3   0  -8 19681.4 682.473   2 
  -3   0   8 19440.3 647.905   1 
  -3   0   9 15.9690 153.303   1 
  -3   0  -9-66.2150 214.983   1 
   3   0   9 82.7303 210.237   3 
   3   0  -9 198.839 159.984   2 
   3   0   9 185.041 208.966   1 
   3   0  10 111520. 1905.19   3 
   3   0  10 111007. 1982.81   1 
   3   0 -10 111147. 1578.66   2 
  -3   0  10 111195. 1570.47   2 
  -3   0 -10 107362. 1969.59   1 
  -3   0 -11 1.39821 206.174   1 
  -3   0  11-95.9097 150.819   2 
   3   0  11 672.010 267.540   3 
   3   0 -11-75.7799 141.882   2 
   3   0  11 735.720 315.816   1 
   3   0 -12 18972.1 664.407   2 
   3   0  12 19241.2 864.563   1 
   3   0  12 18821.7 817.359   3 
  -3   0  12 18622.8 663.205   2 
  -3   0 -12 19136.3 858.900   1 
   3   0 -13-104.303 124.772   2 
  -3   0 -13 242.489 212.177   1 
   3   0  13-116.720 194.576   3 
   3   0  13-35.1357 171.722   1 
  -3   0  13-48.5574 119.518   2 
   3   0 -13 3.11359 244.973   3 
   3   0 -14-87.8155 122.194   2 
  -3   0 -14-65.0492 187.273   1 
   3   0  14-5.17647 194.919   3 
  -3   0  14 87.4798 132.183   2 
   3   0 -14-72.5690 258.752   3 
   3   0  14-278.194 210.003   1 
   3   0  15-133.398 212.112   3 
   3   0 -15-94.2555 121.169   2 
  -3   0 -15-190.551 181.915   1 
   3   0  15-111.826 180.271   1 
  -3   0  15-230.989 152.653   2 
   3   0 -15 398.142 263.698   3 
   3   0 -16 11412.7 543.628   2 
   3   0 -16 12478.6 782.628   3 
   3   0  16 12079.1 720.595   1 
   3   0  16 11691.0 714.943   3 
  -3   0  16 11703.7 541.985   2 
  -3   0 -16 12581.7 749.156   1 
   3   0  17-169.113 175.797   3 
   3   0 -17 121.963 117.114   2 
  -3   0  17 526.858 194.686   2 
  -3   0 -17-241.486 186.574   1 
   3   0 -17 3.22657 201.640   3 
   3   0  17 52.5205 227.536   1 
  -3   0 -18 24061.7 1051.56   1 
   3   0  18 24669.8 1061.99   1 
  -3   0 -18 24334.6 1006.33   3 
   3   0  18 25271.6 1084.77   3 
  -3   0  18 23632.5 781.321   2 
   3   0 -18 24516.9 1113.30   3 
   3   0 -18 24404.2 789.781   2 
   3   0 -19 32.7169 104.821   2 
  -3   0 -19 450.030 341.388   3 
   3   0  19 478.465 265.038   1 
  -3   0  19-41.6927 209.445   2 
   3   0 -19 182.029 254.668   3 
   3   0  19 13.3457 155.706   3 
  -3   0 -19-109.724 213.317   1 
   3   0  20 7921.83 630.915   3 
  -3   0 -20 8546.74 650.723   1 
   3   0  20 8520.98 659.421   1 
  -3   0 -20 8305.50 640.923   3 
  -3   0  20 7828.24 461.799   2 
   3   0 -20 8303.32 703.224   3 
   3   0 -20 7783.76 473.018   2 
   3   0 -21 14.1676 114.288   2 
  -3   0 -21 528.240 288.133   1 
  -3   0  21 252.313 204.408   2 
   3   0 -21-200.112 220.022   3 
   3   0 -22 15580.2 967.839   3 
  -3   0 -22 15693.9 902.965   1 
  -3   0  22 14456.8 646.552   2 
  -3   0 -22 15195.5 869.650   3 
  -3   0  22 15395.3 615.238   1 
   3   0 -22 14667.3 651.306   2 
  -3   0  23-12.9737 95.6084   1 
  -3   0  23 406.003 259.818   2 
  -3   0 -23 383.859 293.582   1 
   3   0 -23 136.219 301.023   3 
   3   0 -23 133.682 148.057   2 
  -3   0 -24 17795.4 984.340   3 
   3   0 -24 18162.0 747.237   2 
  -3   0 -24 19163.9 1026.14   1 
   3   0 -24 18800.7 1093.42   3 
  -3   0  24 18166.5 738.717   2 
  -3   0  24 18785.1 703.447   1 
  -3   0  25 52.9280 127.820   1 
  -3   0  25 309.042 218.371   2 
  -3   0 -25-93.5961 230.212   1 
   3   0 -25 362.769 247.704   3 
  -3   0 -26 1605.59 356.140   1 
  -3   0 -26 2064.47 392.119   3 
  -3   0  26 1894.10 262.610   2 
   3   0 -26 1232.57 286.616   3 
  -3   0  26 2088.00 255.406   1 
  -3   0  27 36.3585 136.090   2 
  -3   0  27-43.0067 96.1636   1 
  -3   0 -27 332.674 238.854   3 
  -3   0 -27 65.5347 214.017   1 
  -3   0 -28 199.851 196.323   1 
  -3   0  28 49.1216 92.5793   1 
  -3   0 -28 177.586 227.036   3 
  -3   0  28-36.5647 120.004   2 
   3   0 -28 11.2422 257.991   3 
  -3   0 -29 1206.08 534.039   3 
  -3   0 -29 372.786 318.727   1 
  -3   0  29 264.838 239.258   2 
   3   0 -29 252.584 456.624   3 
  -3   0  29 166.731 120.303   1 
   3   0 -30 27700.5 1461.33   3 
  -3   0 -30 26591.0 1350.08   3 
  -3   0  30 27672.2 991.559   2 
  -3   0 -30 27418.0 1352.80   1 
  -3   0  31 654.119 280.579   2 
  -3   0 -31 1048.93 442.836   3 
  -3   0 -31 480.515 357.341   1 
   3   0 -31 740.630 492.085   3 
  -3   0 -32 3055.62 513.845   3 
  -3   0  32 3596.32 371.174   2 
   3   0 -32 2792.47 506.111   3 
  -3   0 -32 3091.12 516.656   1 
  -3   0 -33 58.0171 211.223   1 
   3   0 -33 565.188 407.128   3 
  -3   0 -33 262.855 379.209   3 
  -3   0 -34 6565.75 693.796   1 
  -3   0 -34 6187.63 705.035   3 
   3   0 -34 5684.83 720.443   3 
   3   0 -35 50.6723 368.303   3 
  -3   0 -35 695.564 386.519   3 
  -3   0 -35 397.845 344.210   1 
   3   0  35-182.921 219.550   2 
  -3   0 -36 2352.38 465.379   3 
   3   0 -36 2636.56 552.167   3 
  -3   0 -36 2905.15 503.763   1 
   3   0  36 2286.16 425.801   2 
   3   0 -37 322.899 373.904   3 
  -3   0 -37 120.508 219.734   1 
  -3   0 -37 368.476 304.128   3 
   3   0  37 114.865 212.627   2 
  -3   0 -38 3433.65 609.840   3 
   3   0 -38 3064.98 619.237   3 
   3   0  38 2639.94 484.374   2 
  -3   0 -39 1484.65 513.118   3 
   3   0 -39 875.860 423.550   3 
  -3   0 -40 8218.46 898.566   3 
   3   0 -40 7932.96 924.397   3 
  -3   0 -41 645.638 425.957   3 
   3   0 -41-24.2028 284.525   3 
  -3   0 -42 2890.11 612.844   3 
   3   0 -42 2508.54 584.863   3 
  -3   0 -43 354.512 411.841   3 
   3   0 -43 544.544 433.056   3 
   3   0 -44 2136.07 549.505   3 
  -3   0 -44 2626.45 626.207   3 
   3   0 -45-6.16887 298.117   3 
  -3   0 -45 526.815 414.541   3 
  -3   0 -46 1214.20 484.704   3 
  -3  -1   0 167.883 210.288   1 
   3  -1   0-200.080 191.089   1 
   3   1   0-200.785 223.743   2 
   3   1   0 75.0143 188.653   1 
  -3   1   0-110.287 201.593   1 
  -3   1  -1 1918.24 301.842   1 
   3  -1   1 1329.12 241.847   1 
   3   1  -1 1688.00 297.143   2 
  -3  -1   1 1288.62 277.838   1 
  -3  -1  -1 1023.74 241.068   1 
   3  -1  -1 1242.83 198.706   1 
   3   1   1 1407.76 254.908   1 
  -3   1   1 1449.58 240.960   1 
   3   1   2 539.393 198.847   1 
  -3  -1   2 1292.26 291.878   1 
  -3   1  -2 777.084 241.826   1 
  -3  -1  -2 1146.50 282.423   1 
   3  -1   2 647.310 176.629   1 
   3   1  -2 566.716 209.177   2 
  -3   1   2 646.148 176.863   1 
   3  -1  -3 4599.97 378.098   1 
  -3  -1   3 2122.81 293.123   1 
   3   1   3 2549.80 332.729   1 
  -3   1  -3 2164.29 311.838   1 
  -3  -1  -3 2478.90 350.347   1 
   3   1  -3 2691.18 335.214   2 
  -3   1   3 2227.29 259.130   1 
   3  -1   3 2476.58 320.178   1 
  -3  -1  -4 35089.5 1055.78   1 
  -3   1   4 35629.1 856.357   1 
   3  -1   4 34345.5 1008.60   1 
   3   1  -4 35070.3 998.962   2 
  -3   1  -4 35346.6 1024.83   1 
  -3  -1   4 35737.2 974.347   1 
   3   1   4 36745.8 1043.95   1 
   3  -1  -4 34549.8 800.069   1 
  -3   1  -5 16663.7 741.657   1 
  -3  -1  -5 16721.4 763.392   1 
  -3   1   5 16286.6 575.503   1 
   3  -1   5 16782.8 716.951   1 
   3   1  -5 17892.8 710.500   2 
   3   1   5 16987.4 739.825   1 
  -3  -1   5 17321.1 699.817   2 
   3  -1  -5 17721.5 590.302   1 
  -3  -1  -6 6143.84 490.843   1 
  -3   1   6 6941.23 378.422   1 
   3  -1   6 7358.40 502.760   1 
  -3  -1   6 6921.55 472.376   2 
   3   1  -6 7296.54 472.191   2 
  -3   1  -6 6499.04 494.603   1 
   3  -1  -6 8877.63 457.613   1 
   3   1   6 6640.38 490.472   1 
  -3   1   7 2271.78 232.411   1 
   3   1   7 2430.87 317.712   1 
  -3   1  -7 2175.42 325.635   1 
   3   1  -7 2330.85 283.384   2 
   3   1   7 2681.25 336.905   3 
  -3  -1   7 2275.48 288.606   2 
  -3  -1  -7 1874.37 321.143   1 
   3  -1  -7 2019.05 185.308   2 
   3  -1   7 2285.85 339.847   1 
   3  -1  -7 4070.94 302.134   1 
  -3   1   8 19767.0 583.014   1 
   3  -1  -8 18949.0 608.648   2 
  -3  -1  -8 19629.4 840.569   1 
   3   1  -8 19891.3 746.308   2 
   3   1   8 20213.4 836.435   3 
   3  -1   8 18722.8 812.160   1 
  -3  -1   8 18851.9 733.520   2 
  -3   1  -8 19880.1 843.055   1 
   3   1   8 20170.6 833.393   1 
   3   1   9 38978.0 1176.33   1 
  -3   1   9 39221.1 798.284   1 
   3   1  -9 40642.5 1061.51   2 
  -3  -1  -9 40277.8 1178.00   1 
   3  -1   9 40039.6 1197.57   1 
   3   1   9 41733.2 1194.23   3 
  -3  -1   9 38424.4 1027.57   2 
   3  -1  -9 38834.3 860.991   2 
  -3   1  -9 38773.0 1193.21   1 
   3   1  10 5655.52 548.462   1 
   3  -1  10 5078.17 411.991   3 
   3   1 -10 5152.45 400.794   2 
   3   1  10 5010.26 463.653   3 
   3  -1  10 5747.20 536.956   1 
   3  -1 -10 4642.20 319.343   2 
  -3  -1  10 4096.25 373.168   2 
  -3   1  10 4751.04 279.844   1 
  -3  -1 -10 4332.32 438.741   1 
  -3   1 -10 5206.77 490.827   1 
  -3   1  11 136967. 1410.59   1 
  -3   1 -11 134868. 2253.84   1 
   3   1  11 135903. 2248.90   1 
   3   1 -11 132691. 1946.06   2 
   3  -1 -11 139027. 1578.97   2 
   3  -1  11 137382. 2278.34   1 
  -3  -1  11 132020. 1942.84   2 
   3   1  11 135531. 2257.99   3 
  -3  -1 -11 136349. 2214.77   1 
   3  -1 -11 136425. 2317.16   3 
   3  -1  11 138353. 2038.67   3 
   3   1  12 23105.9 960.682   1 
   3  -1 -12 22522.6 646.994   2 
  -3   1 -12 23585.1 1009.61   1 
   3   1 -12 23701.8 836.706   2 
   3  -1  12 25451.8 1035.10   1 
   3  -1  12 24127.6 905.127   3 
   3   1  12 24511.5 990.518   3 
  -3  -1 -12 23295.6 961.214   1 
  -3  -1  12 23077.7 832.674   2 
   3  -1 -12 24339.5 1008.21   3 
  -3   1  12 22815.3 574.318   1 
   3   1  13 53876.6 1472.07   1 
  -3   1 -13 53713.5 1489.74   1 
   3   1 -13 54325.1 1271.52   2 
   3  -1 -13 54543.9 970.895   2 
   3   1  13 56288.0 1502.18   3 
  -3  -1  13 53075.3 1250.90   2 
   3  -1  13 54466.0 1509.78   1 
   3  -1  13 53621.3 1341.13   3 
  -3  -1 -13 53930.1 1467.08   1 
   3  -1 -13 53043.2 1519.86   3 
  -3   1  13 53893.7 860.605   1 
   3   1  14 35871.9 1220.12   1 
   3   1 -14 33126.8 1005.71   2 
   3  -1 -14 33471.8 781.582   2 
  -3   1 -14 34720.7 1230.87   1 
  -3  -1 -14 33053.1 1168.18   1 
   3  -1  14 34498.9 1091.24   3 
   3   1  14 33887.5 1210.03   3 
  -3  -1  14 32862.7 990.837   2 
   3  -1  14 34277.8 1220.10   1 
   3  -1 -14 33808.1 1236.55   3 
  -3   1  14 33451.8 677.073   1 
   3   1 -15 5468.13 431.624   2 
   3   1  15 5871.58 533.222   1 
   3  -1 -15 5712.68 323.138   2 
  -3   1 -15 5308.94 523.398   1 
  -3  -1  15 5812.73 444.401   2 
   3  -1  15 5537.24 482.437   3 
   3  -1  15 6169.33 539.244   1 
   3   1  15 5551.39 533.170   3 
  -3  -1 -15 5275.65 510.687   3 
   3   1 -15 5167.82 484.056   3 
   3  -1 -15 5298.07 528.319   3 
  -3  -1 -15 5474.79 501.249   1 
  -3   1  15 5305.03 273.487   1 
   3   1 -16 4541.51 389.456   2 
   3  -1 -16 4962.38 303.816   2 
   3   1  16 5186.37 493.380   1 
  -3  -1 -16 4487.46 467.087   1 
  -3   1 -16 5056.50 507.935   1 
   3  -1  16 4770.38 446.340   3 
   3   1  16 4749.55 497.989   3 
  -3  -1 -16 5176.65 499.273   3 
   3  -1  16 5083.15 501.185   1 
  -3  -1  16 4077.70 401.197   2 
   3  -1 -16 4922.50 518.501   3 
   3   1 -16 4287.56 455.091   3 
  -3   1  16 4516.87 251.365   1 
  -3   1  17 683.226 110.307   1 
   3  -1  17 578.189 225.000   3 
   3  -1 -17 815.649 137.786   2 
   3   1 -17 762.685 195.147   2 
  -3   1 -17 631.531 265.329   1 
  -3  -1 -17 574.129 224.356   1 
  -3  -1 -17 1694.90 472.201   3 
   3   1  17 838.703 259.193   1 
  -3  -1  17 853.307 297.208   2 
   3   1  17 1134.83 287.775   3 
   3  -1 -17 659.234 304.561   3 
   3   1 -17 793.750 279.381   3 
  -3   1  17 632.893 146.298   2 
   3  -1  17 884.132 262.224   1 
   3   1 -18 21141.2 1002.72   3 
   3   1  18 20343.3 968.441   1 
   3   1  18 20632.7 1020.07   3 
  -3  -1  18 20336.3 825.539   2 
  -3  -1 -18 20331.1 975.995   3 
  -3   1 -18 18738.2 973.827   1 
   3  -1  18 20531.1 937.465   3 
   3  -1  18 20431.7 994.293   1 
   3  -1 -18 20889.3 1073.35   3 
  -3  -1 -18 19528.3 959.544   1 
  -3   1  18 21001.3 611.313   2 
  -3   1  18 19711.9 513.984   1 
   3   1 -18 20908.4 828.058   2 
   3  -1 -18 20169.6 611.426   2 
   3   1 -19 287.536 150.970   2 
   3  -1 -19 63.4632 82.7676   2 
  -3  -1 -19 533.390 368.840   3 
   3   1  19 227.884 236.943   1 
  -3  -1 -19 30.2650 175.286   1 
  -3   1 -19 193.360 241.334   1 
   3  -1  19 306.934 185.160   3 
  -3  -1  19 343.504 253.012   2 
  -3   1  19 129.312 51.3394   1 
   3  -1 -19 169.896 235.297   3 
  -3   1  19 337.266 135.799   2 
   3   1 -19-95.9912 219.330   3 
   3  -1  19 594.431 268.972   1 
  -3   1  20 6322.57 292.354   1 
   3   1  20 6551.95 579.063   1 
  -3  -1 -20 7898.46 688.098   3 
  -3  -1  20 7000.55 528.366   2 
   3  -1  20 6307.99 543.519   3 
  -3   1 -20 6362.39 599.692   1 
  -3   1  20 6191.75 351.105   2 
   3   1 -20 6358.87 577.608   3 
   3  -1 -20 6542.42 350.086   2 
  -3  -1 -20 5846.77 554.820   1 
   3  -1 -20 6373.72 634.242   3 
   3   1 -20 6005.31 454.731   2 
  -3   1 -21 9740.29 736.014   1 
  -3  -1 -21 8917.05 674.438   1 
   3   1  21 10376.9 735.316   1 
  -3  -1  21 9470.03 588.777   2 
   3   1 -21 9581.57 710.691   3 
  -3  -1 -21 9851.31 736.140   3 
   3   1 -21 9669.50 581.190   2 
   3  -1  21 9528.71 684.898   3 
   3  -1 -21 9342.58 421.655   2 
   3  -1 -21 9331.12 776.890   3 
  -3   1  21 9168.96 353.014   1 
  -3   1  21 9819.77 439.248   2 
   3   1 -22 1745.30 284.084   2 
  -3  -1  22 2299.45 395.973   2 
  -3  -1 -22 4018.68 617.308   3 
   3  -1 -22 2383.02 496.152   3 
   3   1  22 1924.19 375.807   1 
  -3   1  22 1514.15 154.010   1 
  -3   1  22 1904.44 242.924   2 
  -3  -1 -22 1812.71 357.076   1 
   3  -1  22 2000.74 365.674   3 
   3   1 -22 2053.33 390.345   3 
  -3   1 -22 1900.49 449.268   1 
  -3  -1 -23 21244.2 1099.98   3 
  -3  -1 -23 19672.4 1032.82   1 
  -3   1  23 19815.3 531.170   1 
  -3  -1  23 21193.6 890.309   2 
  -3   1 -23 26646.9 1201.24   3 
  -3   1  23 20820.8 652.224   2 
   3  -1 -23 20922.5 1193.70   3 
   3   1 -23 21400.4 1121.25   3 
  -3   1 -23 20378.7 1102.30   1 
   3   1 -23 20314.3 883.665   2 
  -3   1  24 9625.46 377.961   1 
  -3  -1 -24 10073.4 763.397   1 
  -3  -1 -24 10775.6 861.025   3 
  -3  -1  24 10282.4 668.706   2 
  -3   1  24 10144.4 477.326   2 
   3  -1 -24 11175.1 893.786   3 
   3   1 -24 9750.96 773.185   3 
  -3  -1  24 9434.23 584.421   1 
  -3   1 -24 10143.5 806.684   1 
   3   1 -24 8807.69 596.945   2 
   3   1 -25 12402.9 906.381   3 
  -3  -1 -25 11901.9 820.855   1 
  -3  -1 -25 12531.9 893.121   3 
  -3  -1  25 12670.9 720.926   2 
  -3  -1  25 12007.9 661.712   1 
  -3   1  25 12799.9 531.196   2 
   3  -1 -25 12187.4 941.373   3 
   3   1 -25 11875.3 691.320   2 
  -3   1 -25 12593.4 904.663   1 
  -3   1  25 12053.4 423.105   1 
  -3  -1 -26 1622.09 378.943   1 
  -3  -1 -26 2265.66 504.316   3 
  -3   1 -26 1671.31 451.020   1 
  -3   1 -26 2496.49 488.973   3 
  -3  -1  26 2117.65 366.262   2 
   3  -1 -26 1794.72 452.299   3 
  -3   1  26 1582.29 220.004   2 
   3   1 -26 1515.33 398.276   3 
  -3   1  26 1749.32 173.351   1 
   3   1 -26 1285.80 268.148   2 
  -3  -1  26 1475.60 261.028   1 
  -3   1 -27 2527.88 404.179   3 
  -3  -1 -27 3086.70 528.281   3 
  -3  -1 -27 2869.94 448.630   1 
  -3  -1  27 2553.97 317.327   1 
  -3  -1  27 3051.55 387.139   2 
  -3   1  27 3119.70 275.597   2 
  -3   1  27 2381.76 198.555   1 
   3   1 -27 2744.51 442.301   3 
   3  -1 -27 2517.43 488.258   3 
  -3   1 -27 2630.96 465.345   1 
   3  -1 -28 84.3752 264.223   3 
  -3   1  28 63.6879 65.2676   1 
  -3  -1  28 251.478 146.946   1 
  -3   1 -28 111.411 215.858   3 
  -3  -1 -28 166.106 311.764   3 
  -3  -1  28 365.173 216.037   2 
  -3   1  28 174.058 114.346   2 
  -3   1 -28-59.7118 232.700   1 
   3   1 -28 382.439 309.012   3 
  -3  -1 -28 500.212 246.426   1 
   3   1 -29 311.485 262.227   3 
  -3   1 -29 332.869 234.412   1 
  -3   1 -29 916.065 331.604   3 
  -3  -1 -29 958.943 357.429   3 
  -3  -1  29 275.405 177.865   2 
   3  -1 -29 51.1262 267.648   3 
  -3   1  29 412.780 127.903   2 
  -3  -1 -29 306.831 216.437   1 
  -3  -1  29 370.044 160.604   1 
  -3   1 -30 1561.25 390.620   1 
   3   1 -30 1957.22 427.355   3 
  -3   1 -30 2942.01 545.538   3 
  -3  -1 -30 1791.39 478.381   3 
  -3  -1  30 1679.70 312.243   2 
   3  -1 -30 1450.90 406.391   3 
  -3   1  30 1859.49 227.409   2 
  -3  -1 -30 2117.06 404.901   1 
  -3  -1 -31 1392.16 360.564   1 
  -3  -1 -31 1496.44 432.565   3 
  -3   1 -31 1874.01 455.398   1 
  -3  -1  31 1767.28 332.192   2 
   3   1 -31 1665.24 430.495   3 
   3  -1 -31 2095.61 488.234   3 
  -3   1 -31 2096.10 442.021   3 
  -3  -1 -32 2677.36 463.939   1 
  -3   1 -32 2840.51 521.189   3 
  -3  -1 -32 2984.66 587.415   3 
  -3  -1  32 2954.83 409.155   2 
   3  -1 -32 2991.44 568.212   3 
   3   1 -32 3125.56 562.932   3 
  -3   1 -32 2816.12 511.666   1 
  -3  -1 -33 5452.44 747.884   3 
  -3   1 -33 3334.26 537.226   3 
   3  -1 -33 4582.04 676.043   3 
  -3  -1 -33 3789.15 538.526   1 
  -3   1 -33 4104.86 580.530   1 
   3  -1  33 3355.02 526.914   2 
   3   1 -33 3627.08 608.860   3 
  -3  -1  33 4149.58 469.404   2 
   3  -1 -34 854.952 400.517   3 
  -3   1 -34 1115.95 406.344   3 
  -3  -1 -34 43.3614 286.370   1 
  -3   1 -34 393.536 286.222   1 
  -3  -1 -34 1515.94 475.161   3 
   3   1 -34 181.738 251.435   3 
   3  -1  34-140.090 240.502   2 
  -3   1 -35 1187.09 412.202   3 
  -3  -1 -35 646.207 363.011   3 
   3   1 -35 389.961 286.559   3 
   3  -1 -35 766.290 363.480   3 
  -3  -1 -35 116.570 220.724   1 
   3  -1  35 214.812 226.035   2 
   3  -1 -36 2218.62 547.929   3 
  -3  -1 -36 1942.38 455.921   1 
  -3  -1 -36 1986.88 481.205   3 
  -3   1 -36 2141.85 512.271   3 
   3  -1  36 2154.15 439.375   2 
   3   1 -36 1824.70 475.302   3 
  -3  -1 -37 114.506 289.972   3 
  -3  -1 -37 348.542 273.276   1 
   3  -1 -37 681.939 368.416   3 
   3   1 -37 257.015 342.273   3 
  -3   1 -37 590.783 366.145   3 
   3   1  37 128.635 206.944   2 
   3  -1  37 519.134 311.545   2 
  -3   1 -38 1310.96 405.126   3 
  -3  -1 -38 1115.29 363.692   1 
   3   1 -38 1073.79 402.490   3 
   3  -1 -38 1103.71 453.821   3 
  -3  -1 -38 1069.95 427.670   3 
   3  -1  38 951.245 360.882   2 
   3  -1  39-291.129 234.242   2 
   3  -1 -39-31.5229 286.317   3 
  -3   1 -39 736.644 388.881   3 
  -3  -1 -39 1036.00 454.030   3 
   3   1 -39 890.050 420.108   3 
  -3   1 -40 1588.01 555.845   3 
  -3  -1 -40 1796.24 568.810   3 
   3   1 -40 611.806 405.956   3 
   3  -1 -40 878.108 380.160   3 
  -3  -1 -41 646.248 393.932   3 
   3   1 -41 664.936 404.383   3 
   3  -1 -41 535.233 369.540   3 
   3   1 -42 286.317 345.771   3 
  -3   1 -42 1281.57 470.072   3 
  -3  -1 -42 349.512 372.303   3 
   3  -1 -42-71.5432 323.683   3 
   3  -1 -43 780.804 450.091   3 
  -3  -1 -43 1336.82 504.633   3 
   3   1 -43 485.192 329.405   3 
  -3  -1 -44 481.539 475.784   3 
   3   1 -44-100.497 288.409   3 
   3  -1 -44 421.824 454.674   3 
  -3  -1 -45 2340.07 629.746   3 
   3   1 -45 621.555 312.162   3 
   3   1 -46 775.590 363.338   3 
  -3   2   0 94.1857 229.812   1 
   3   2   0 142.592 217.956   2 
   3  -2   0 674.962 232.886   1 
  -3  -2   0-236.649 272.204   1 
  -3   2  -1 34847.1 974.338   1 
   3   2  -1 34091.5 1056.47   2 
   3  -2   1 38262.4 1037.52   1 
   3   2   1 35114.5 1056.72   2 
  -3  -2   1 35296.2 1053.53   2 
   3  -2  -1 32631.4 866.855   1 
  -3  -2  -1 33660.5 1057.54   1 
  -3   2   1 36735.9 934.226   1 
  -3   2  -2 38350.2 1049.64   1 
   3  -2   2 38368.5 1046.26   1 
   3  -2  -2 40412.8 964.420   1 
   3   2  -2 35350.4 1078.32   2 
   3   2   2 36613.4 1085.74   2 
  -3  -2   2 37647.3 1095.36   2 
  -3  -2  -2 36817.1 1108.38   1 
  -3   2   2 39415.5 966.691   1 
  -3   2  -3 44754.9 1180.02   1 
   3  -2  -3 43056.7 1010.78   1 
   3   2  -3 38598.6 1119.35   2 
  -3  -2   3 38548.5 1116.26   2 
   3   2   3 40670.8 1132.97   2 
   3  -2   3 40356.7 1103.18   1 
  -3   2   3 43060.7 1021.40   1 
  -3  -2  -3 39132.6 1145.36   1 
  -3   2  -4 202962. 2501.26   1 
   3  -2  -4 205777. 2029.13   1 
   3   2  -4 203173. 2538.33   2 
  -3  -2   4 204749. 2507.06   2 
   3  -2   4 204716. 2493.23   1 
   3   2   4 201346. 2528.66   2 
  -3   2   4 206073. 2020.60   1 
  -3  -2  -4 197608. 2565.69   1 
  -3   2  -5 52562.0 1334.06   1 
   3  -2  -5 45246.0 923.946   1 
   3   2  -5 45512.1 1215.91   2 
   3  -2   5 46688.0 1234.00   1 
  -3  -2   5 44041.5 1190.39   2 
  -3   2   5 50100.0 988.236   1 
   3   2   5 44925.3 1245.59   1 
   3   2   5 44259.0 1210.18   2 
  -3  -2  -5 45500.2 1236.82   1 
   3  -2  -6 15920.0 535.168   1 
  -3   2  -6 18059.4 800.445   1 
   3   2  -6 15562.0 725.974   2 
   3   2   6 15963.9 741.712   3 
  -3  -2   6 16357.6 737.843   2 
   3  -2   6 16005.1 754.845   1 
  -3   2   6 17643.6 568.167   1 
   3   2   6 16512.2 766.998   1 
  -3  -2  -6 16259.9 774.232   1 
  -3  -2  -7 9956.27 623.259   1 
  -3   2  -7 11164.2 702.404   1 
   3   2  -7 10251.5 586.643   2 
   3   2   7 10339.4 618.756   3 
  -3  -2   7 10488.7 619.171   2 
   3  -2  -7 9816.69 400.604   1 
  -3   2   7 11807.6 458.394   1 
   3  -2   7 11106.3 651.498   1 
   3   2   7 9597.02 603.128   1 
  -3  -2  -8 45890.4 1290.08   1 
   3   2  -8 46555.7 1225.74   2 
  -3   2  -8 45801.9 1310.99   1 
  -3  -2   8 45449.5 1216.15   2 
   3   2   8 48041.2 1328.37   3 
   3  -2   8 46843.1 1307.41   1 
  -3   2   8 49287.4 843.636   1 
   3   2   8 46265.6 1288.85   1 
   3  -2  -8 45924.3 835.600   1 
  -3  -2  -9 9319.14 610.957   1 
   3   2  -9 10002.1 598.503   2 
  -3   2  -9 9627.38 620.405   1 
   3   2   9 9927.25 630.159   3 
  -3  -2   9 9166.54 580.111   2 
   3   2   9 10004.5 621.369   1 
   3  -2   9 9705.87 630.207   1 
  -3   2   9 11119.3 395.558   1 
   3  -2  -9 10045.0 634.199   3 
   3  -2  -9 8457.22 324.335   1 
   3  -2  10 4194.80 426.581   1 
   3   2  10 4126.65 400.313   1 
   3   2 -10 4442.15 406.515   2 
  -3   2  10 4642.55 254.354   1 
  -3   2 -10 3558.58 407.032   1 
   3   2  10 3815.38 417.695   3 
  -3  -2 -10 3857.66 411.308   1 
  -3  -2  10 4281.84 422.945   2 
   3  -2 -10 2152.67 161.330   2 
   3  -2 -10 3858.72 437.434   3 
   3  -2  11 6203.83 533.484   1 
   3   2 -11 6191.97 474.037   2 
  -3  -2 -11 5863.52 498.313   1 
   3  -2  11 6568.70 466.111   3 
   3   2  11 6424.64 525.244   3 
  -3   2 -11 6173.73 541.058   1 
  -3  -2  11 5702.23 464.936   2 
   3  -2 -11 5889.45 292.936   2 
  -3   2  11 6511.06 275.038   1 
   3  -2 -11 5880.02 528.273   3 
   3   2  11 5904.70 495.000   1 
   3  -2  12 9665.10 534.945   3 
  -3  -2 -12 8723.84 611.831   1 
  -3  -2  12 8463.91 556.516   2 
   3   2  12 8858.50 631.176   3 
  -3   2 -12 8527.51 630.755   1 
   3   2 -12 8928.90 558.745   2 
   3  -2  12 9285.42 646.507   1 
  -3   2  12 9044.31 299.256   1 
   3  -2 -12 8802.96 647.984   3 
   3  -2 -12 9264.36 367.648   2 
   3   2  12 9029.51 603.349   1 
   3   2 -13 15219.7 741.854   2 
  -3  -2  13 13549.2 754.075   2 
  -3  -2 -13 14632.9 771.591   1 
   3  -2 -13 14993.7 442.070   2 
  -3  -2 -13 16129.5 871.555   3 
   3  -2  13 15321.6 685.173   3 
   3   2  13 14570.9 815.587   3 
  -3   2 -13 14091.6 803.309   1 
   3  -2  13 14727.6 822.368   1 
   3  -2 -13 15266.5 864.988   3 
  -3   2  13 14076.8 341.254   1 
   3   2  13 14820.3 776.547   1 
   3   2 -14 20654.1 872.291   2 
   3  -2 -14 19425.7 487.727   2 
   3  -2  14 20038.6 969.548   1 
  -3  -2 -14 19913.8 941.687   3 
  -3  -2  14 19681.3 861.603   2 
   3  -2  14 20096.1 782.711   3 
  -3  -2 -14 19198.7 878.236   1 
   3   2  14 20304.5 984.643   3 
  -3   2 -14 19914.8 965.788   1 
   3   2  14 19121.6 890.602   1 
   3  -2 -14 19486.1 984.024   3 
   3  -2 -15 1587.49 149.519   2 
   3   2  15 1827.55 321.062   1 
   3   2 -15 1771.03 316.756   2 
   3  -2  15 1714.93 349.571   1 
   3  -2  15 1885.03 280.406   3 
   3   2  15 1538.51 316.463   3 
  -3  -2  15 1996.82 404.143   2 
  -3   2 -15 1798.30 382.825   1 
   3  -2 -15 1024.73 309.893   3 
  -3  -2 -15 1202.12 267.531   1 
   3  -2 -16 18093.9 446.287   2 
   3   2  16 20243.6 1016.80   3 
   3  -2  16 19113.7 972.642   1 
  -3  -2  16 18452.7 835.903   2 
   3  -2  16 18473.6 799.175   3 
  -3  -2 -16 19423.0 976.193   3 
  -3  -2 -16 18651.5 900.904   1 
  -3   2 -16 17923.2 934.247   1 
   3   2 -16 19931.3 877.430   2 
   3  -2 -16 18892.4 989.937   3 
   3   2 -16 18545.8 875.437   3 
   3   2  16 18690.3 905.607   1 
  -3  -2 -17 3003.53 420.966   1 
   3   2 -17 3008.66 380.368   2 
   3   2  17 3129.16 393.431   1 
   3  -2  17 2858.47 425.715   1 
  -3  -2 -17 3521.32 511.668   3 
   3  -2  17 2736.47 345.253   3 
  -3  -2  17 3051.49 410.814   2 
   3  -2 -17 2560.98 448.152   3 
   3   2 -17 2740.61 364.491   3 
   3  -2 -17 2609.66 172.627   2 
  -3   2 -17 3274.82 482.270   1 
  -3  -2 -18 3460.26 425.238   1 
  -3   2 -18 3827.94 488.295   1 
  -3  -2  18 4096.51 496.025   2 
   3  -2  18 3815.22 406.200   3 
   3  -2 -18 3379.63 519.852   3 
   3   2 -18 3177.31 415.519   3 
  -3  -2 -18 3919.19 520.307   3 
   3  -2 -18 3320.00 182.849   2 
   3   2  18 3636.07 452.748   1 
   3   2 -18 3694.07 401.713   2 
   3  -2  19 35199.5 1172.30   3 
  -3  -2  19 35469.8 1206.78   2 
   3   2  19 35797.8 1308.45   1 
  -3  -2 -19 36462.9 1295.21   1 
   3  -2 -19 37662.8 1493.81   3 
   3   2 -19 36867.8 1291.41   3 
  -3   2 -19 35737.1 1382.07   1 
   3  -2 -19 31654.4 537.148   2 
   3   2 -19 35936.6 1215.71   2 
  -3  -2 -19 37187.1 1376.23   3 
   3  -2 -20 614.485 349.349   3 
  -3  -2  20 1171.93 362.018   2 
   3   2 -20 788.475 220.069   2 
   3   2  20 883.617 302.636   1 
  -3  -2 -20 538.883 247.920   1 
  -3   2 -20 802.225 369.915   1 
   3  -2  20 480.835 220.972   3 
   3   2 -20 883.859 287.715   3 
  -3  -2  21 4376.53 488.596   2 
  -3  -2 -21 5466.28 622.183   3 
  -3  -2 -21 4065.31 475.556   1 
  -3   2 -21 3706.07 493.870   1 
   3  -2  21 3533.14 407.479   3 
   3  -2 -21 4406.60 583.619   3 
   3   2 -21 3013.31 430.977   3 
   3   2 -21 3717.59 415.878   2 
   3   2  21 4608.04 496.989   1 
  -3   2 -22 13803.3 916.159   1 
  -3  -2 -22 14192.6 909.205   3 
  -3  -2  22 14323.7 797.321   2 
   3   2 -22 13197.1 835.476   3 
   3  -2  22 13388.8 781.444   3 
  -3  -2 -22 13393.5 833.029   1 
   3  -2 -22 14276.5 985.304   3 
   3   2 -22 13706.4 781.542   2 
   3   2  22 13706.5 839.705   1 
  -3   2 -23 4303.07 587.491   1 
  -3  -2  23 4922.07 502.505   2 
  -3  -2 -23 4873.26 616.059   3 
   3  -2 -23 4447.12 594.578   3 
   3  -2  23 3774.85 442.951   3 
  -3  -2 -23 4009.91 480.115   1 
   3   2 -23 4348.50 501.771   3 
   3   2 -23 3997.96 437.472   2 
   3   2 -24 2928.19 399.141   2 
   3  -2  24 2627.52 388.454   3 
  -3  -2 -24 2975.34 478.636   3 
  -3  -2 -24 2807.21 421.148   1 
   3  -2 -24 2996.82 533.407   3 
   3   2 -24 2714.35 417.163   3 
  -3   2 -24 2704.32 441.782   1 
  -3  -2  24 2827.92 387.862   2 
  -3   2 -25 279.884 257.177   1 
  -3  -2 -25 872.026 473.776   3 
  -3  -2  25 991.408 344.321   2 
   3  -2 -25-191.360 281.385   3 
   3   2 -25-187.849 236.797   3 
  -3  -2 -25-252.179 240.313   1 
   3   2 -25-68.1631 156.287   2 
  -3  -2 -26 20286.0 1056.23   1 
  -3  -2  26 19539.8 961.921   1 
  -3  -2  26 19654.5 970.229   2 
  -3   2 -26 19471.2 1150.25   1 
   3   2 -26 21024.8 1121.76   3 
  -3  -2 -26 20380.8 1185.74   3 
   3  -2 -26 20286.1 1251.03   3 
   3   2 -26 19124.1 975.449   2 
  -3  -2  27 4560.54 552.121   2 
   3   2 -27 3012.71 507.505   3 
  -3   2 -27 2433.02 543.357   1 
  -3  -2  27 2478.95 368.433   1 
  -3  -2 -27 5153.58 893.511   3 
   3  -2 -27 3563.58 742.514   3 
   3   2 -27 2576.92 433.414   2 
  -3  -2 -27 2492.07 478.114   1 
  -3  -2  28 26859.4 1153.69   1 
  -3  -2 -28 27259.1 1293.53   1 
  -3  -2  28 27376.0 1179.71   2 
  -3  -2 -28 26222.7 1384.17   3 
  -3   2 -28 26693.7 1402.92   1 
   3  -2 -28 29898.0 1540.34   3 
   3   2 -28 28935.5 1358.53   3 
  -3   2 -29 121.842 332.362   1 
   3   2 -29 101.024 373.264   3 
  -3  -2 -29 159.303 279.281   1 
  -3  -2 -29 1064.69 437.012   3 
  -3  -2  29 1211.23 353.069   2 
   3  -2 -29 901.735 534.560   3 
  -3  -2  29 392.757 236.274   1 
   3   2 -30-18.5157 224.878   3 
  -3  -2 -30 972.073 474.446   3 
  -3  -2 -30 318.174 234.159   1 
  -3  -2  30 798.894 324.316   2 
  -3  -2  30 154.129 151.422   1 
   3  -2 -30 620.270 375.999   3 
   3  -2  30-46.4533 229.070   2 
  -3   2 -30 345.886 271.307   1 
  -3   2 -31 11079.6 947.218   1 
  -3  -2  31 11066.2 802.565   2 
  -3  -2 -31 11432.2 974.773   3 
  -3  -2 -31 10953.4 831.110   1 
   3  -2 -31 11566.9 1034.16   3 
   3   2 -31 10968.2 920.002   3 
   3  -2  31 9444.04 859.258   2 
   3   2 -32-136.061 248.335   3 
   3  -2 -32 62.3656 302.144   3 
  -3  -2  32 627.318 283.333   2 
  -3  -2 -32 175.938 340.335   3 
  -3  -2 -32 139.079 210.876   1 
   3  -2  32 315.636 266.442   2 
   3   2 -33 30.8119 270.721   3 
  -3  -2 -33 180.704 343.286   3 
  -3  -2  33 186.661 206.103   2 
   3  -2 -33-293.158 286.586   3 
   3  -2  33 62.7401 254.406   2 
  -3  -2 -33 411.255 264.255   1 
  -3  -2 -34 1945.67 400.258   1 
   3   2 -34 1660.22 414.023   3 
  -3  -2 -34 1724.02 479.658   3 
  -3  -2  34 1481.11 340.690   2 
   3  -2 -34 2034.80 521.312   3 
   3  -2  34 960.142 340.211   2 
  -3  -2 -35 693.057 285.951   1 
  -3  -2 -35 1378.78 488.992   3 
   3   2 -35 583.238 279.937   3 
  -3  -2  35 792.714 299.180   2 
   3  -2 -35 1432.04 473.807   3 
   3  -2  35 700.025 307.781   2 
  -3  -2 -36 3915.64 677.717   3 
   3   2 -36 4607.77 684.536   3 
  -3  -2 -36 4056.01 547.342   1 
   3  -2 -36 3612.82 655.545   3 
   3  -2  36 4061.43 616.532   2 
   3  -2  37 4546.91 667.349   2 
  -3  -2 -37 5529.21 782.106   3 
   3   2 -37 5417.49 732.725   3 
   3  -2 -37 5072.34 773.563   3 
  -3  -2 -37 4727.52 624.980   1 
   3  -2  38-43.7189 238.049   2 
  -3  -2 -38 843.314 452.054   3 
   3  -2 -38 353.113 358.102   3 
   3   2 -38 396.341 334.588   3 
   3  -2  39 195.868 278.299   2 
  -3  -2 -39 261.059 293.667   3 
   3  -2 -39 87.5240 361.628   3 
   3   2 -39 514.277 377.779   3 
   3  -2 -40 1534.38 538.859   3 
   3  -2  40 1214.80 390.190   2 
  -3  -2 -40 1025.64 418.795   3 
   3   2 -40 2534.68 546.006   3 
  -3  -2 -41 1574.37 527.911   3 
   3   2 -41 1708.08 493.226   3 
   3  -2 -41 2206.77 603.659   3 
   3   2 -42 3551.01 653.447   3 
  -3  -2 -42 3538.47 694.791   3 
   3  -2 -42 3912.56 760.816   3 
  -3  -2 -43 1085.13 499.545   3 
   3   2 -43 1073.92 420.872   3 
   3  -2 -43 1481.54 550.342   3 
   3   3   0 242.759 208.791   2 
   3  -3   0-1.03232 169.414   1 
  -3  -3   0 276.195 285.284   2 
   3   3  -1 76473.2 1658.31   2 
  -3   3  -1 75497.3 1480.77   1 
  -3   3   1 75739.7 1409.88   1 
   3   3   1 75353.7 1650.72   2 
   3  -3  -1 73312.1 1411.38   1 
  -3  -3   1 75833.5 1646.84   2 
  -3  -3  -1 74525.5 1626.51   2 
   3  -3   1 75409.6 1494.58   1 
  -3   3   2 13194.9 617.299   1 
   3   3  -2 11307.6 664.896   2 
   3   3   2 11349.4 657.498   2 
  -3  -3   2 10781.5 646.595   2 
  -3   3  -2 14036.1 716.632   1 
  -3  -3  -2 10668.7 665.446   2 
   3  -3  -2 11028.1 546.674   1 
   3  -3   2 11101.1 604.912   1 
  -3  -3   3 28883.8 1040.14   2 
   3   3  -3 29244.1 1044.85   2 
   3   3   3 29590.0 1040.31   2 
  -3   3  -3 29026.2 979.199   1 
   3  -3  -3 27946.7 823.410   1 
  -3   3   3 28673.5 833.348   1 
   3  -3   3 30540.1 986.942   1 
  -3  -3  -3 29090.4 1041.77   1 
   3  -3  -4 14485.5 577.570   1 
  -3   3   4 15450.7 619.878   1 
   3   3  -4 13702.4 720.925   2 
  -3  -3   4 13232.4 734.394   2 
   3   3   4 15321.3 736.990   3 
   3   3   4 14603.4 725.975   2 
  -3   3  -4 16292.5 798.522   1 
   3  -3   4 15372.3 740.069   1 
  -3  -3  -4 14505.7 757.508   1 
  -3   3  -5 53844.5 1364.83   1 
  -3   3   5 51985.3 1039.93   1 
   3   3   5 52938.2 1379.07   2 
   3   3  -5 52794.7 1408.91   2 
   3   3   5 54089.0 1379.55   3 
  -3  -3   5 52902.5 1404.19   2 
   3  -3  -5 51417.9 1038.95   1
[truncated: 500,551 more chars]
