# Supplementary material for: Amino-oxetanes as amide isosteres by an alternative defluorosulfonylative coupling of sulfonyl fluorides
Source: Springer Nature journal article supplement (doi:10.1038/s41557-021-00856-2), 2022-01-27
Supplement: 41557_2021_856_MOESM150_ESM.mol [file 41557_2021_856_MOESM150_ESM.mol]

nchem.21010138B-comp56.mol
  ChemDraw10262115192D

 27 28  0  0  0  0  0  0  0  0999 V2000
   -0.5383    0.9275    0.0000 C   0  0  0  0  0  0  0  0  0  0  0  0
   -0.5383    0.3128    0.0000 C   0  0  0  0  0  0  0  0  0  0  0  0
   -0.0059    0.0055    0.0000 C   0  0  0  0  0  0  0  0  0  0  0  0
    0.5264    0.3128    0.0000 C   0  0  0  0  0  0  0  0  0  0  0  0
    0.5264    0.9275    0.0000 C   0  0  0  0  0  0  0  0  0  0  0  0
   -0.0059    1.2349    0.0000 C   0  0  0  0  0  0  0  0  0  0  0  0
    1.0588    1.2349    0.0000 C   0  0  0  0  0  0  0  0  0  0  0  0
    1.6462    1.8223    0.0000 C   0  0  0  0  0  0  0  0  0  0  0  0
    1.0588    2.4097    0.0000 O   0  0  0  0  0  0  0  0  0  0  0  0
    0.4714    1.8223    0.0000 C   0  0  0  0  0  0  0  0  0  0  0  0
   -1.2527   -0.0997    0.0000 O   0  0  0  0  0  0  0  0  0  0  0  0
   -1.2527   -1.1722    0.0000 Si  0  0  0  0  0  0  0  0  0  0  0  0
   -2.0777   -1.1722    0.0000 C   0  0  0  0  0  0  0  0  0  0  0  0
   -1.2527   -1.9972    0.0000 C   0  0  0  0  0  0  0  0  0  0  0  0
   -0.4277   -1.1722    0.0000 C   0  0  0  0  0  0  0  0  0  0  0  0
   -2.4902   -1.8866    0.0000 C   0  0  0  0  0  0  0  0  0  0  0  0
   -2.4902   -0.4577    0.0000 C   0  0  0  0  0  0  0  0  0  0  0  0
   -1.9672   -2.4097    0.0000 C   0  0  0  0  0  0  0  0  0  0  0  0
   -0.5383   -2.4097    0.0000 C   0  0  0  0  0  0  0  0  0  0  0  0
   -0.0152   -0.4577    0.0000 C   0  0  0  0  0  0  0  0  0  0  0  0
   -0.0152   -1.8866    0.0000 C   0  0  0  0  0  0  0  0  0  0  0  0
    1.7782    0.8196    0.0000 S   0  0  0  0  0  0  0  0  0  0  0  0
    1.3671    0.1075    0.0000 O   0  0  0  0  0  0  0  0  0  0  0  0
    2.1893    1.5316    0.0000 O   0  0  0  0  0  0  0  0  0  0  0  0
    2.4902    0.4084    0.0000 F   0  0  0  0  0  0  0  0  0  0  0  0
   -1.2577    1.3429    0.0000 O   0  0  0  0  0  0  0  0  0  0  0  0
   -1.9697    0.9318    0.0000 C   0  0  0  0  0  0  0  0  0  0  0  0
 26 27  1  0      
  1 26  1  0      
  1  2  2  0      
  2  3  1  0      
  3  4  2  0      
  4  5  1  0      
  5  6  2  0      
  6  1  1  0      
  5  7  1  0      
  2 11  1  0      
  7 22  1  0      
  7  8  1  0      
  8  9  1  0      
  9 10  1  0      
 10  7  1  0      
 15 21  1  0      
 15 20  1  0      
 14 19  1  0      
 14 18  1  0      
 13 17  1  0      
 13 16  1  0      
 12 15  1  0      
 12 14  1  0      
 12 13  1  0      
 11 12  1  0      
 22 23  2  0      
 22 24  2  0      
 22 25  1  0      
M  STY  1   1 SUP
M  SLB  1   1   1
M  SAL   1  2  26  27
M  SBL   1  1   2
M  SMT   1 OMe
M  SBV   1   2    0.7194   -0.4153
M  END
